# Supplementary material for: Transcriptome analysis of the pulp of citrus fruitlets suggests that domestication enhanced growth processes and reduced chemical defenses increasing palatability
Source: Front Plant Sci. 2022 Sep 2;13:982683. doi: 10.3389/fpls.2022.982683 (PMC9478336; doi:10.3389/fpls.2022.982683)
Supplement: Supplementary file 3 [file Data_Sheet_3.xlsx]

## Sheet: Supplementary_Table_1
Supplementary Table 1. List of primers used in the study
Gene Name Abbrev.	Sample	Forward	Reverse
CitPH1	ICH;SCM;WMU;CLM;S1;S2;S3	CCAGAGACAGATGTGTCGTCA	CATGATTGCACGGTCCATGGT
CitPH5.2	SCM;WMU;CLM;S1;S2;S3	GGAGCTCTGTTGATGTGTGCA	ATGAACTTAATGACGTCCAATGGT
CitPH5.2	ICH	GGAGCTCTGTTGATGTGTGCA	ATGAACTTAATGACGTCCAATGGT
CitMAC9F1	ICH;WMU;S1;S2;S3	GCAGAAACGGATTGATGAAGAG	CATCAGGGACAACTTCCTCAG
CitMAC9F1	SCM	GCAGAAACGGATTGATGAAGAG	CATCAGGGACAACTTYCTCRG
CitAN1	SCM;WMU;CLM;S1;S2;S3	ACCGGTTATGATAGGTAGCAGT	GCTGCTTCTGAAGAATGGTAGA
CitAN1	ICH	CCCGGTTATGATAGGTAGCAGT	GCTGCTTCTGAAGAATGGTAGA
CitPH3	ICH;SCM;WMU;CLM;S1;S2;S3	CTGAGATTCTTAGTGATGGCTTC	CAGATGTCACTGGAGTTGTGC
CitPH4	SCM;WMU;CLM;S1;S2;S3	GATCTCATTCTTCGCCTACATC	CTTGGCTTATCAGCTTCTTACTC
CitPH4	ICH	GATCTCATTCTTCGCCTACATC	CTTGGCTTACCAGCTTCTTACTC
CitAN11	ICH;SCM;WMU;CLM;S1;S2;S3	GGTCTCCTGCACAGCCTGA	AGTTAGCTATCCCAAACGAGCA
CitPH5.1	SCM;WMU;CLM;S1;S2;S3	TCCTTGGTGACAGTGAGGGA	AAACTGCAGCTCTGATGGCT
CitPH5.1	ICH	TCCTTGGTGACAGTGAGGGA	AAGCTGCAGCTCAGATGGCT
CitSO	ICH;SCM;WMU;CLM;S1;S2;S3	CTTCTGGGAGAAAGCTTTTGAATG	CCAGAACAACATTGATAGGAATGA
CitERF13	SCM;WMU;CLM;S1;S2;S3	TCAGGCTCAGGCTAGTGGAT	GCGTATCATAGGTCCCCAGC
CitERF13	ICH	TCAGGCTCAGGCTAGTGGAT	GCGTATCGTAGGTCCCCAGC
CitVHA_C4	ICH;SCM;WMU;CLM;S1;S2;S3	CGACGAAACTGCTCCCTTCT	GATTGGCCTGCTCGAGATGA
ase.1.1	SCM;WMU;CLM;S1;S2;S3	CGGGCCACTTCACTCTCATT	AACACAGCTGGTCCTGCAAA
ase.1.2	SCM;WMU;CLM;S1;S2;S3	AGTCCAGCCATCAATGACACT	ACCTTGCCTGATTGCCACAA
gs.4.1	ICH;SCM;WMU;CLM;S1;S2;S3	GGAGGTGAAACTGGAAGAGGG	TGAGGGTGAAAGTCGGTTGA
gs.4.2	ICH;SCM;WMU;CLM;S1;S2;S3	GGCGGCGTACCAGATCATAA	CGCTCCAGTGACAATGTTGG
co.1	SCM;WMU;CLM;S1;S2;S3	GTCACCAATTCTGTCTCTGTGA	GCGGGAGGGCCAATATAGTC
CitACTIN11	CLM;S1;S2	GGYATTGCCGATAGAATGAGCA	TCATACTCAGCCTTTGCAATCCA
CitACTIN11	ICH;SCM;WMU;S3	GGCATTGCCGATAGAATGAGCA	TCATACTCAGCCTTTGCAATCCA
CitUBC	ICH;SCM;WMU;CLM;S1;S2;S3	GTGCAGCGAGAGAAATCAGC	ACTTGTGGAGGTTGCAGAGG

## Sheet: Supplementary_Table_2
Supplementary Table 2. DEGs in the pulp of developing fruitlets of ICH versus SCM (Log2FC=0.58 and α=0.05).
		Expression Data				KEGG Data
Gene Id	Gene Name	log2FoldChange	lfcSE	pValue	pAdj	KEGG Id	EC Number	Pathway KEGG Id	Supp. Figure Code
LOC18042808	chalcone synthase	-18.069	3.77924	1.74586e-39	3.64649e-38	K00660	[EC:2.3.1.74]	cic00941;cic00960;cic04712	082;088;117
LOC18033006	heat shock protein 83	-16.6867	3.64308	3.94939e-34	6.90414e-33	K04079	NA	cic04141;cic04626	112;116
LOC18035879	acid phosphatase 1	-16.2872	3.60419	1.79269e-32	2.9645e-31	NA	NA	NA	NA
LOC18036667	defensin-like protein 1	-15.541	3.53014	1.50765e-29	2.27934e-28	NA	NA	NA	NA
LOC18045039	caffeic acid 3-O-methyltransferase	-15.4085	1.34821	3.96815e-36	7.37048e-35	K13066	[EC:2.1.1.68 2.1.1.4]	cic00380;cic00940	033;081
LOC18044758	SNF2 domain-containing protein CLASSY 1	-15.3258	3.50724	6.87541e-29	1.01152e-27	K10875	[EC:3.6.4.-]	cic03440	105
LOC18043348	tyrosine/DOPA decarboxylase 5	-15.1267	3.4883	5.21844e-28	7.44577e-27	NA	NA	NA	NA
LOC18045597	callose synthase 7	-15.0401	3.47935	1.0594e-27	1.49618e-26	K11000	[EC:2.4.1.-]	NA	NA
LOC18045154	anthranilate N-methyltransferase	-14.8046	1.3432	1.54399e-33	2.64577e-32	K13066	[EC:2.1.1.68 2.1.1.4]	cic00380;cic00940	033;081
LOC18033150	F-box protein At2g02240	14.7826	2.62706	3.68071e-29	5.48494e-28	NA	NA	NA	NA
LOC18047282	ankyrin repeat-containing protein NPR4	14.6678	3.52694	1.49157e-25	1.94907e-24	NA	NA	NA	NA
LOC18033218	anthranilate N-methyltransferase	-14.6414	0.708515	6.70161e-85	4.1004e-83	K13066	[EC:2.1.1.68 2.1.1.4]	cic00380;cic00940	033;081
LOC18055030	nuclear poly(A) polymerase 4	-14.5303	3.42512	4.65652e-26	6.17004e-25	K14376	[EC:2.7.7.19]	cic03015	095
LOC18054015	UDP-glycosyltransferase 79B3	-14.4254	3.41558	1.43958e-25	1.88231e-24	NA	NA	NA	NA
LOC18034083	secoisolariciresinol dehydrogenase	-14.1414	3.38726	1.73908e-24	2.18863e-23	NA	NA	NA	NA
LOC18042657	probable disease resistance protein At4g27220	-14.0561	3.37684	2.53302e-24	3.17055e-23	NA	NA	NA	NA
LOC18043275	pre-mRNA-processing factor 19	-13.8967	3.36187	1.21427e-23	1.47636e-22	NA	NA	NA	NA
LOC18052677	protein PLANT CADMIUM RESISTANCE 2	13.8584	2.80789	9.21591e-22	1.02578e-20	NA	NA	NA	NA
LOC18042812	chalcone synthase 2	13.8423	1.35621	2.89391e-29	4.33733e-28	K00660	[EC:2.3.1.74]	cic00941;cic00960;cic04712	082;088;117
LOC112099277	uncharacterized LOC112099277	-13.8317	3.35551	2.17326e-23	2.61331e-22	NA	NA	NA	NA
LOC112099295	uncharacterized LOC112099295	-13.7855	3.34908	2.3187e-23	2.78498e-22	NA	NA	NA	NA
LOC18033322	major allergen Pru ar 1	13.7483	10.3418	0.0016273	0.00539829	NA	NA	NA	NA
LOC18032537	serine/threonine-protein phosphatase 6 regulatory ankyrin repeat subunit B	13.705	2.6901	1.37155e-24	1.73554e-23	NA	NA	NA	NA
LOC18034319	uncharacterized LOC18034319	-13.6688	3.3059	4.35671e-23	5.1672e-22	NA	NA	NA	NA
LOC18040068	uncharacterized LOC18040068	-13.6477	3.34767	6.26609e-22	7.03472e-21	NA	NA	NA	NA
LOC112096701	putative disease resistance protein RGA3	-13.6025	3.3285	7.39752e-23	8.69438e-22	NA	NA	NA	NA
LOC18046152	disease resistance-like protein DSC1	13.5288	3.41104	1.24702e-21	1.38061e-20	NA	NA	NA	NA
LOC18034178	vacuolar cation/proton exchanger 3	-13.4608	3.3284	2.54808e-21	2.75795e-20	K07300	NA	NA	NA
LOC112095831	uncharacterized LOC112095831	-13.3979	3.31183	8.00274e-22	8.92182e-21	NA	NA	NA	NA
LOC18041135	basic blue protein	-13.3892	3.30624	3.92198e-22	4.44869e-21	NA	NA	NA	NA
LOC112098433	uncharacterized LOC112098433	-13.3595	0.815546	5.55636e-53	1.68743e-51	NA	NA	NA	NA
LOC18039116	nucleosome assembly protein 1;2	13.3078	2.65266	1.07721e-23	1.31279e-22	K11279	NA	NA	NA
LOC18053050	linoleate 13S-lipoxygenase 2-1, chloroplastic	-13.2939	3.29736	9.84015e-22	1.09351e-20	K00454	[EC:1.13.11.12]	cic00591;cic00592	052;053
LOC18034048	probable metal-nicotianamine transporter YSL6	-13.2216	3.28906	1.51425e-21	1.66848e-20	NA	NA	NA	NA
LOC18048636	protein STICHEL-like 2	-13.1881	3.28626	2.20237e-21	2.39623e-20	NA	NA	NA	NA
LOC112097332	uncharacterized LOC112097332	-13.075	3.27534	6.0307e-21	6.39759e-20	NA	NA	NA	NA
LOC18052892	UPF0481 protein At3g47200	13.0728	3.18036	1.43219e-20	1.49194e-19	NA	NA	NA	NA
LOC18043390	sodium/hydrogen exchanger 6	-13.0689	3.23504	4.91038e-21	5.2385e-20	NA	NA	NA	NA
LOC18033043	uncharacterized LOC18033043	-13.0673	3.27264	4.73201e-21	5.05598e-20	NA	NA	NA	NA
LOC18050970	UDP-glycosyltransferase 90A1	13.0311	3.06476	2.20939e-20	2.2776e-19	NA	NA	NA	NA
LOC18053682	uncharacterized LOC18053682	-13.0001	3.26417	6.93589e-21	7.33913e-20	NA	NA	NA	NA
LOC112099313	uncharacterized LOC112099313	-12.9573	3.26165	1.24834e-20	1.30368e-19	NA	NA	NA	NA
LOC18044420	probable metal-nicotianamine transporter YSL7	-12.9242	3.31264	1.6589e-17	1.50371e-16	NA	NA	NA	NA
LOC112097042	putative disease resistance protein RGA3	12.921	2.78186	1.62903e-21	1.78643e-20	NA	NA	NA	NA
LOC112099275	uncharacterized LOC112099275	-12.8488	3.24786	1.86599e-20	1.93222e-19	NA	NA	NA	NA
LOC112096243	uncharacterized LOC112096243	-12.8452	3.25571	3.05856e-20	3.1328e-19	NA	NA	NA	NA
LOC18054401	receptor-like serine/threonine-protein kinase SD1-8	12.836	2.77663	3.18954e-21	3.43259e-20	NA	NA	NA	NA
LOC18055469	transcription factor MYBS3	-12.7926	3.24338	3.53603e-20	3.61119e-19	NA	NA	NA	NA
LOC112095901	uncharacterized LOC112095901	-12.7723	3.24319	5.4864e-20	5.55936e-19	NA	NA	NA	NA
LOC18046240	chaperonin CPN60-2, mitochondrial	12.7631	2.94127	1.18484e-20	1.23799e-19	NA	NA	NA	NA
LOC18052683	cytochrome P450 71A1	12.7595	1.69717	5.16151e-14	3.87076e-13	NA	NA	NA	NA
LOC18050857	zinc transporter 8	-12.756	3.24649	1.26787e-19	1.2632e-18	K14709	NA	NA	NA
LOC112098305	coumarin 8-geranyltransferase 1b, chloroplastic-like	12.6936	2.76351	1.02912e-20	1.07745e-19	NA	NA	NA	NA
LOC112098326	uncharacterized LOC112098326	-12.6902	3.23255	7.52854e-20	7.57698e-19	NA	NA	NA	NA
LOC18053801	coumarin 8-geranyltransferase 1b, chloroplastic	12.6279	1.07658	7.15079e-28	1.0168e-26	K09833	[EC:2.5.1.115 2.5.1.116]	cic00130	013
LOC18035409	geraniol 8-hydroxylase	-12.5882	3.21449	2.81774e-19	2.77151e-18	NA	NA	NA	NA
LOC18045399	putative disease resistance RPP13-like protein 1	-12.5841	3.22054	1.46183e-19	1.45365e-18	NA	NA	NA	NA
LOC18046075	uncharacterized protein At1g05835	-12.5622	3.22068	2.43045e-19	2.39738e-18	NA	NA	NA	NA
LOC18038658	cysteine--tRNA ligase 2, cytoplasmic	-12.4967	3.21007	2.34628e-19	2.31545e-18	K01883	[EC:6.1.1.16]	cic00970	090
LOC18054884	ABC transporter C family member 3	12.459	3.30004	3.03801e-18	2.86101e-17	NA	NA	NA	NA
LOC18040137	F-box protein PP2-B15	-12.4283	3.29913	8.36666e-15	6.57294e-14	NA	NA	NA	NA
LOC18035701	putative Peroxidase 48	-12.4127	3.20388	6.29521e-19	6.10817e-18	K00430	[EC:1.11.1.7]	cic00940	081
LOC18033438	major allergen Pru ar 1	12.4077	1.30246	3.24165e-24	4.04536e-23	NA	NA	NA	NA
LOC18035284	uncharacterized LOC18035284	-12.4011	3.20093	5.39912e-19	5.2485e-18	NA	NA	NA	NA
LOC112096702	putative disease resistance protein RGA3	-12.3721	3.1783	5.90293e-19	5.7329e-18	NA	NA	NA	NA
LOC112099818	putative disease resistance protein RGA4	12.3666	2.5353	1.35039e-20	1.40813e-19	NA	NA	NA	NA
LOC112099665	caffeic acid 3-O-methyltransferase-like	12.3178	3.28608	8.72569e-18	8.02124e-17	NA	NA	NA	NA
LOC18044629	agamous-like MADS-box protein AGL29	-12.2545	3.18524	1.9608e-18	1.85749e-17	NA	NA	NA	NA
LOC18041639	protein SRG1	12.2194	3.07695	5.45482e-18	5.07498e-17	NA	NA	NA	NA
LOC112098432	uncharacterized LOC112098432	-12.1878	0.607084	2.71333e-80	1.53384e-78	NA	NA	NA	NA
LOC18048675	mitogen-activated protein kinase kinase 9	-12.174	3.17541	2.29731e-18	2.17232e-17	NA	NA	NA	NA
LOC18034993	anti-sigma-I factor RsgI6	-12.1124	3.17	4.12554e-18	3.86767e-17	NA	NA	NA	NA
LOC112098073	uncharacterized LOC112098073	12.082	2.60338	3.46622e-19	3.3981e-18	NA	NA	NA	NA
LOC18054952	cold and drought-regulated protein CORA	12.0602	0.378008	3.38484e-203	1.23535e-200	NA	NA	NA	NA
LOC18047634	putative disease resistance RPP13-like protein 1	12.0563	2.93686	4.38122e-18	4.10182e-17	NA	NA	NA	NA
LOC112100803	uncharacterized LOC112100803	-12.0538	3.16198	5.00002e-18	4.66646e-17	NA	NA	NA	NA
LOC112098336	uncharacterized LOC112098336	-12.0356	3.16337	8.5764e-18	7.89796e-17	NA	NA	NA	NA
LOC18052402	G-type lectin S-receptor-like serine/threonine-protein kinase At1g11410	12.0128	2.76082	2.8453e-18	2.68317e-17	NA	NA	NA	NA
LOC18035327	nitrate regulatory gene2 protein	-12.0103	3.17971	9.19316e-17	8.02203e-16	NA	NA	NA	NA
LOC18051735	uncharacterized LOC18051735	-12.0099	3.13783	9.43263e-18	8.65199e-17	NA	NA	NA	NA
LOC18049491	ankyrin-1	-12.0078	3.15095	1.53028e-17	1.39075e-16	NA	NA	NA	NA
LOC18045727	beta-amyrin synthase	12.0027	0.714377	1.68321e-55	5.47121e-54	NA	NA	NA	NA
LOC112097182	disease resistance protein At4g27190-like	-11.938	3.14885	1.02626e-17	9.40495e-17	NA	NA	NA	NA
LOC18035999	putative disease resistance protein At4g19050	-11.9266	3.1487	1.26475e-17	1.15448e-16	NA	NA	NA	NA
LOC18040739	cytochrome P450 98A2	-11.9238	0.449019	2.74819e-139	4.57364e-137	K09754	[EC:1.14.14.96]	cic00940;cic00941;cic00945	081;082;086
LOC18037321	G-type lectin S-receptor-like serine/threonine-protein kinase At1g67520	-11.9159	3.14616	1.15241e-17	1.05286e-16	NA	NA	NA	NA
LOC18040493	beta-galactosidase 6	-11.8907	3.14537	1.72858e-17	1.56483e-16	NA	NA	NA	NA
LOC18036655	uncharacterized LOC18036655	-11.8754	3.14328	1.8132e-17	1.63786e-16	NA	NA	NA	NA
LOC112101110	uncharacterized LOC112101110	-11.864	3.14599	3.13064e-17	2.79034e-16	NA	NA	NA	NA
LOC112096194	uncharacterized LOC112096194	-11.8388	3.14466	4.36798e-17	3.86176e-16	NA	NA	NA	NA
LOC18050534	MDIS1-interacting receptor like kinase 2	-11.7726	3.13847	6.65985e-17	5.85071e-16	NA	NA	NA	NA
LOC18052012	patatin-like protein 1	-11.7695	3.13046	3.18378e-17	2.83449e-16	NA	NA	NA	NA
LOC18043155	tryptophan aminotransferase-related protein 3	-11.7683	3.13938	9.03045e-17	7.88998e-16	NA	NA	NA	NA
LOC18047133	probable glutathione S-transferase	-11.7657	3.1258	3.4117e-17	3.03177e-16	K00799	[EC:2.5.1.18]	cic00480	041
LOC112096713	putative disease resistance protein RGA3	-11.7501	3.13103	4.94886e-17	4.36603e-16	NA	NA	NA	NA
LOC18045038	caffeic acid 3-O-methyltransferase	-11.7483	0.816238	8.67521e-41	1.89371e-39	K13066	[EC:2.1.1.68 2.1.1.4]	cic00380;cic00940	033;081
LOC18034668	uncharacterized LOC18034668	11.7318	2.8755	1.90223e-17	1.71604e-16	NA	NA	NA	NA
LOC18045241	probable glutathione S-transferase	11.7307	2.81354	3.42916e-17	3.04598e-16	K00799	[EC:2.5.1.18]	cic00480	041
LOC18035663	uncharacterized LOC18035663	11.6916	2.65889	5.03055e-18	4.69285e-17	NA	NA	NA	NA
LOC18035901	probable indole-3-acetic acid-amido synthetase GH3.1	-11.6916	3.13474	2.21527e-16	1.89803e-15	K14487	NA	cic04075	109
LOC18036712	putative disease resistance RPP13-like protein 2	-11.6841	3.12017	5.02843e-17	4.43435e-16	NA	NA	NA	NA
LOC18044478	metal transporter Nramp6	-11.678	3.06777	4.55873e-17	4.02698e-16	NA	NA	NA	NA
LOC18048294	disease resistance-like protein DSC1	11.6714	3.21899	7.80157e-16	6.48147e-15	NA	NA	NA	NA
LOC18033574	LOB domain-containing protein 4	11.6565	2.80691	5.64786e-17	4.97217e-16	NA	NA	NA	NA
LOC18055693	protein kinase PINOID 2	-11.6469	3.1171	7.22686e-17	6.3408e-16	K08286	[EC:2.7.11.-]	NA	NA
LOC18053506	WUSCHEL-related homeobox 6	-11.6322	1.31365	1.67726e-21	1.83836e-20	NA	NA	NA	NA
LOC18032066	two-component response regulator ARR12	-11.6188	3.1246	1.4941e-16	1.29131e-15	NA	NA	NA	NA
LOC112100170	uncharacterized LOC112100170	11.5559	2.52462	7.01967e-18	6.48734e-17	NA	NA	NA	NA
LOC112097434	uncharacterized LOC112097434	-11.5542	3.10668	1.28836e-16	1.11674e-15	NA	NA	NA	NA
LOC112100350	uncharacterized LOC112100350	-11.5306	3.10528	1.7176e-16	1.48078e-15	NA	NA	NA	NA
LOC18034978	BEL1-like homeodomain protein 1	11.5101	1.2968	5.02893e-21	5.35947e-20	NA	NA	NA	NA
LOC112097255	uncharacterized LOC112097255	-11.5101	3.10196	1.74425e-16	1.50251e-15	NA	NA	NA	NA
LOC112098278	uncharacterized LOC112098278	-11.505	3.10295	2.13439e-16	1.83176e-15	NA	NA	NA	NA
LOC18053630	disease resistance-like protein DSC1	11.5043	3.2014	2.50939e-15	2.0273e-14	NA	NA	NA	NA
LOC18038551	uncharacterized LOC18038551	-11.5002	3.10013	1.71431e-16	1.47856e-15	NA	NA	NA	NA
LOC112100059	uncharacterized LOC112100059	-11.4817	3.10555	2.94182e-16	2.50097e-15	NA	NA	NA	NA
LOC18037596	uncharacterized LOC18037596	-11.4756	3.0988	2.34194e-16	2.0008e-15	NA	NA	NA	NA
LOC112095900	uncharacterized LOC112095900	-11.4552	3.09551	2.38375e-16	2.03568e-15	NA	NA	NA	NA
LOC18045400	auxin response factor 4	-11.4448	0.962937	3.21473e-27	4.4584e-26	NA	NA	NA	NA
LOC18032835	bidirectional sugar transporter SWEET17	-11.4438	3.07221	2.52334e-16	2.14959e-15	K15382	NA	NA	NA
LOC112097248	50S ribosomal protein HLP, mitochondrial-like	-11.4419	3.09304	2.32398e-16	1.98708e-15	NA	NA	NA	NA
LOC18052579	putative lipid-transfer protein DIR1	-11.4129	0.710718	1.05765e-50	3.05589e-49	NA	NA	NA	NA
LOC112097050	uncharacterized LOC112097050	-11.4128	3.09133	3.30272e-16	2.79636e-15	NA	NA	NA	NA
LOC112097740	uncharacterized LOC112097740	11.3623	2.46604	1.85163e-17	1.67185e-16	NA	NA	NA	NA
LOC112098872	phosphoglucan phosphatase DSP4, amyloplastic-like	-11.3548	3.09377	9.27232e-16	7.66966e-15	NA	NA	NA	NA
LOC18050105	BAG family molecular chaperone regulator 6	-11.3496	3.08801	7.2506e-16	6.04304e-15	NA	NA	NA	NA
LOC18040621	DNA-directed RNA polymerase II subunit 1	-11.3482	3.22605	1.4128e-11	9.17882e-11	NA	NA	NA	NA
LOC18044735	probable RNA-binding protein ARP1	-11.3424	3.0831	4.93982e-16	4.14033e-15	NA	NA	NA	NA
LOC18035000	subtilisin-like protease SBT4.5	-11.3063	3.16178	5.87221e-13	4.12562e-12	NA	NA	NA	NA
LOC18048819	CSC1-like protein At4g02900	-11.3	3.0788	6.74792e-16	5.62633e-15	K21989	NA	NA	NA
LOC18055428	lachrymatory-factor synthase	-11.286	1.31224	2.94955e-20	3.02711e-19	NA	NA	NA	NA
LOC18033101	probable methyltransferase PMT15	-11.2638	3.07651	1.01119e-15	8.35081e-15	NA	NA	NA	NA
LOC18045170	aldehyde oxidase GLOX	-11.2525	3.07621	1.19733e-15	9.84117e-15	NA	NA	NA	NA
LOC18035133	uncharacterized LOC18035133	-11.2458	3.06714	1.01213e-15	8.35529e-15	NA	NA	NA	NA
LOC18031586	trans-resveratrol di-O-methyltransferase	11.1915	3.17052	2.10499e-14	1.61886e-13	NA	NA	NA	NA
LOC18044764	putative ABC transporter C family member 15	-11.1015	3.07498	1.28174e-14	9.99401e-14	NA	NA	NA	NA
LOC18031593	sugar transport protein 8	-11.0894	3.06371	6.52092e-15	5.15014e-14	K24193	NA	NA	NA
LOC18041693	putative disease resistance protein RGA3	-11.0735	3.02475	2.00398e-15	1.63102e-14	NA	NA	NA	NA
LOC18036713	uncharacterized LOC18036713	-11.0627	3.024	1.98807e-15	1.6187e-14	NA	NA	NA	NA
LOC112098365	putative 12-oxophytodienoate reductase 11	11.0522	3.01127	4.43706e-14	3.3371e-13	NA	NA	NA	NA
LOC112096001	small nucleolar RNA snoR28	11.0177	3.15337	6.96888e-14	5.17213e-13	NA	NA	NA	NA
LOC18046843	cytochrome P450 71A26	10.9805	0.809417	7.00712e-36	1.29113e-34	NA	NA	NA	NA
LOC112101571	uncharacterized LOC112101571	-10.9445	3.0394	6.1055e-15	4.83121e-14	NA	NA	NA	NA
LOC18045036	golgin subfamily B member 1	-10.9324	3.04487	7.10908e-15	5.59766e-14	NA	NA	NA	NA
LOC18044909	uncharacterized LOC18044909	-10.884	3.03516	1.13673e-14	8.89334e-14	NA	NA	NA	NA
LOC18038413	UPF0481 protein At3g47200	-10.8803	3.03695	1.42484e-14	1.10849e-13	NA	NA	NA	NA
LOC18033079	LRR receptor-like serine/threonine-protein kinase ERL1	-10.8564	3.03059	1.42934e-14	1.11115e-13	K20718	[EC:2.7.11.1]	cic04016	107
LOC112098884	uncharacterized LOC112098884	-10.8561	3.02361	9.70554e-15	7.60755e-14	NA	NA	NA	NA
LOC18032191	ankyrin repeat-containing protein At5g02620	10.8457	2.65327	1.22201e-14	9.539e-14	NA	NA	NA	NA
LOC18045943	disease resistance protein TAO1	10.8455	2.64468	1.19879e-14	9.36827e-14	NA	NA	NA	NA
LOC18052011	uncharacterized LOC18052011	-10.8301	3.02372	1.28018e-14	9.9856e-14	NA	NA	NA	NA
LOC18031211	primary amine oxidase	-10.8219	3.04138	5.13721e-14	3.85531e-13	K00276	[EC:1.4.3.21]	cic00260;cic00350;cic00360;cic00410;cic00950;cic00960	022;031;032;035;087;088
LOC18038600	15.7 kDa heat shock protein, peroxisomal	10.8068	2.78851	2.05488e-14	1.58149e-13	K13993	NA	cic04141	112
LOC18034103	probable carotenoid cleavage dioxygenase 4, chloroplastic	-10.7898	3.02183	1.54947e-14	1.20275e-13	K09840	[EC:1.13.11.51]	cic00906	076
LOC18052870	flavonoid 3'-monooxygenase	-10.7464	1.31757	3.19309e-18	3.00433e-17	NA	NA	NA	NA
LOC18038442	F-box/FBD/LRR-repeat protein At5g53840	-10.7403	3.01377	1.66173e-14	1.28605e-13	NA	NA	NA	NA
LOC18038412	putative UPF0481 protein At3g02645	-10.737	3.01453	1.87983e-14	1.44999e-13	NA	NA	NA	NA
LOC18034249	hevein-like preproprotein	10.7344	3.00143	3.1298e-13	2.23589e-12	NA	NA	NA	NA
LOC112098990	caffeoylshikimate esterase-like	-10.7256	3.01573	2.51026e-14	1.91989e-13	NA	NA	NA	NA
LOC18042992	uncharacterized LOC18042992	10.6991	2.41251	8.54403e-16	7.08416e-15	NA	NA	NA	NA
LOC18040808	auxin-induced protein 22D	-10.6715	3.0119	4.20254e-14	3.1653e-13	K14484	NA	cic04075	109
LOC112098987	caffeoylshikimate esterase-like	-10.6705	3.01029	4.17844e-14	3.14942e-13	NA	NA	NA	NA
LOC18036656	uncharacterized LOC18036656	-10.6662	0.970329	1.19833e-23	1.45783e-22	NA	NA	NA	NA
LOC112098556	uncharacterized LOC112098556	-10.628	3.0066	5.2261e-14	3.91637e-13	NA	NA	NA	NA
LOC18041239	long chain acyl-CoA synthetase 9, chloroplastic	-10.6256	0.969422	1.66102e-23	2.00663e-22	K01897	[EC:6.2.1.3]	cic00061;cic00071;cic04146	008;010;115
LOC18039967	protein FAR1-RELATED SEQUENCE 5	-10.6177	2.93928	2.55594e-14	1.9541e-13	NA	NA	NA	NA
LOC112100154	uncharacterized LOC112100154	-10.6122	3.00176	4.40834e-14	3.3167e-13	NA	NA	NA	NA
LOC112095597	uncharacterized LOC112095597	-10.6027	3.0084	6.96893e-14	5.17213e-13	NA	NA	NA	NA
LOC18053696	caffeic acid 3-O-methyltransferase	10.5862	2.87003	2.70981e-13	1.94253e-12	NA	NA	NA	NA
LOC18035548	FAD-linked sulfhydryl oxidase ERV1	-10.5767	2.99592	7.67507e-14	5.67393e-13	K17783	[EC:1.8.3.2]	NA	NA
LOC18040304	disease resistance protein At4g27190	-10.571	1.30164	5.5226e-18	5.13575e-17	NA	NA	NA	NA
LOC18055028	endoribonuclease YBEY, chloroplastic	-10.5553	2.99757	7.43876e-14	5.50511e-13	NA	NA	NA	NA
LOC18033773	shikimate O-hydroxycinnamoyltransferase	-10.5484	2.99377	5.98818e-14	4.47136e-13	NA	NA	NA	NA
LOC112099095	uncharacterized LOC112099095	-10.5192	3.00571	2.43124e-13	1.74886e-12	NA	NA	NA	NA
LOC18049487	uncharacterized LOC18049487	-10.5143	2.99984	1.63677e-13	1.18847e-12	NA	NA	NA	NA
LOC18037669	G-type lectin S-receptor-like serine/threonine-protein kinase CES101	-10.5075	2.9757	6.58796e-14	4.8989e-13	NA	NA	NA	NA
LOC18044457	BTB/POZ domain-containing protein At3g56230	-10.5036	0.806296	3.09074e-33	5.253e-32	K10523	NA	NA	NA
LOC18039773	probable LRR receptor-like serine/threonine-protein kinase At3g47570	-10.4977	2.99584	1.73375e-13	1.25757e-12	NA	NA	NA	NA
LOC18037281	uncharacterized LOC18037281	10.4927	3.1103	3.77648e-12	2.54164e-11	NA	NA	NA	NA
LOC18050418	protein STRICTOSIDINE SYNTHASE-LIKE 4	-10.4903	2.99615	3.07921e-13	2.20278e-12	NA	NA	NA	NA
LOC18043334	cation/H(+) antiporter 15	-10.4746	2.99206	1.5847e-13	1.15107e-12	NA	NA	NA	NA
LOC18031543	uncharacterized LOC18031543	-10.4395	2.97248	1.3051e-13	9.52631e-13	NA	NA	NA	NA
LOC112096183	uncharacterized LOC112096183	-10.4167	2.98027	1.44216e-13	1.05046e-12	NA	NA	NA	NA
LOC112098019	protein ALP1-like	10.4139	2.46824	1.62088e-14	1.2563e-13	NA	NA	NA	NA
LOC18031710	cyclic nucleotide-gated ion channel 1	10.4104	2.77416	4.82333e-13	3.40712e-12	K05391	NA	cic04626	116
LOC18054044	6-hydroxynicotinate 3-monooxygenase	10.3889	0.56175	8.28644e-68	3.69128e-66	NA	NA	NA	NA
LOC112096719	2-hydroxyisoflavanone dehydratase-like	10.3636	0.550707	1.75145e-71	8.39524e-70	NA	NA	NA	NA
LOC112096298	pre-mRNA-splicing factor CWC21-like	-10.3506	2.97203	1.97303e-13	1.42517e-12	NA	NA	NA	NA
LOC18054362	LRR receptor-like serine/threonine-protein kinase	-10.3475	2.95059	1.90068e-13	1.37434e-12	NA	NA	NA	NA
LOC18032149	early light-induced protein 1, chloroplastic	-10.3366	2.97243	2.51682e-13	1.80729e-12	NA	NA	NA	NA
LOC112101176	uncharacterized LOC112101176	-10.3285	2.97283	2.84433e-13	2.03615e-12	NA	NA	NA	NA
LOC18052682	MLP-like protein 43	10.3219	3.09345	8.50644e-12	5.59998e-11	NA	NA	NA	NA
LOC18050786	AT-hook motif nuclear-localized protein 28	-10.3094	2.96555	2.17252e-13	1.56709e-12	NA	NA	NA	NA
LOC18037099	sulfite exporter TauE/SafE family protein 3	-10.2776	0.850076	5.31158e-29	7.82556e-28	NA	NA	NA	NA
LOC18044991	uncharacterized LOC18044991	-10.2676	2.94657	2.36159e-13	1.69994e-12	NA	NA	NA	NA
LOC112101133	uncharacterized LOC112101133	-10.2508	2.96635	5.38626e-13	3.79446e-12	NA	NA	NA	NA
LOC18041724	uncharacterized LOC18041724	-10.2466	1.3023	5.81917e-17	5.12082e-16	NA	NA	NA	NA
LOC112098068	disease resistance protein RPS2-like	10.2435	2.58471	1.77721e-12	1.21416e-11	NA	NA	NA	NA
LOC18050035	disease resistance-like protein DSC1	-10.2259	2.95005	3.28947e-13	2.34754e-12	NA	NA	NA	NA
LOC18045508	protodermal factor 1	-10.2231	0.196377	0	0	NA	NA	NA	NA
LOC112097791	uncharacterized LOC112097791	10.2036	3.07959	1.73304e-11	1.12138e-10	NA	NA	NA	NA
LOC18035232	uncharacterized LOC18035232	10.1891	2.39995	2.24853e-14	1.72542e-13	NA	NA	NA	NA
LOC18036714	uncharacterized LOC18036714	-10.1818	2.96643	4.80375e-13	3.39675e-12	NA	NA	NA	NA
LOC18048780	protein SHORT-ROOT	10.1754	2.60056	1.32273e-12	9.12663e-12	NA	NA	NA	NA
LOC18053047	linoleate 13S-lipoxygenase 2-1, chloroplastic	10.1718	0.452634	2.88405e-100	2.39988e-98	K00454	[EC:1.13.11.12]	cic00591;cic00592	052;053
LOC18048295	TMV resistance protein N	10.129	1.32357	3.62746e-16	3.06134e-15	NA	NA	NA	NA
LOC18046151	disease resistance-like protein DSC1	10.127	3.06919	2.33038e-11	1.49626e-10	NA	NA	NA	NA
LOC112096169	auxin-induced protein 15A-like	-10.12	2.94869	9.02688e-13	6.27628e-12	NA	NA	NA	NA
LOC112099081	uncharacterized LOC112099081	10.0815	3.06931	3.77426e-11	2.38723e-10	NA	NA	NA	NA
LOC112096228	uncharacterized LOC112096228	10.0751	2.82336	4.47801e-12	2.9973e-11	NA	NA	NA	NA
LOC112096456	gamma-terpinene synthase, chloroplastic-like	-10.0607	0.752549	8.13754e-36	1.49413e-34	NA	NA	NA	NA
LOC18052259	flavonol synthase/flavanone 3-hydroxylase	-10.0539	2.94899	2.2522e-12	1.53263e-11	K05278	[EC:1.14.20.6]	cic00941	082
LOC18054339	calcium-binding protein PBP1	-10.0386	2.94436	1.99502e-12	1.36118e-11	NA	NA	NA	NA
LOC18055479	seed lectin	-10.0233	2.97159	1.08501e-11	7.10242e-11	NA	NA	NA	NA
LOC18031408	S-type anion channel SLAH2	10.0185	1.63386	1.00059e-10	6.16022e-10	NA	NA	NA	NA
LOC18040265	uncharacterized LOC18040265	-9.98344	2.93797	2.58548e-12	1.75427e-11	NA	NA	NA	NA
LOC18042961	uncharacterized LOC18042961	-9.98119	3.09425	4.37949e-09	2.42176e-08	NA	NA	NA	NA
LOC112097652	uncharacterized LOC112097652	-9.97921	0.970936	9.38169e-21	9.84202e-20	NA	NA	NA	NA
LOC18036496	probably inactive leucine-rich repeat receptor-like protein kinase At2g25790	-9.97722	2.92847	1.44725e-12	9.95605e-12	NA	NA	NA	NA
LOC18031442	wall-associated receptor kinase 2	-9.96178	1.30782	6.42741e-16	5.36124e-15	NA	NA	NA	NA
LOC18042589	uncharacterized LOC18042589	-9.91396	2.95703	1.417e-11	9.20317e-11	NA	NA	NA	NA
LOC112097662	DNA (cytosine-5)-methyltransferase 1B-like	9.89621	3.0493	9.69872e-11	5.97461e-10	NA	NA	NA	NA
LOC18045144	uncharacterized LOC18045144	-9.89496	2.92769	4.21106e-12	2.82589e-11	NA	NA	NA	NA
LOC18054024	protein CUP-SHAPED COTYLEDON 2	-9.89342	2.92675	7.5079e-12	4.95832e-11	NA	NA	NA	NA
LOC18050780	uncharacterized LOC18050780	9.88428	3.05673	1.63718e-10	9.92664e-10	NA	NA	NA	NA
LOC112100324	uncharacterized LOC112100324	-9.86485	1.29754	7.44763e-16	6.20175e-15	NA	NA	NA	NA
LOC18038022	putative FBD-associated F-box protein At5g56440	-9.84395	2.91793	4.23052e-12	2.83781e-11	NA	NA	NA	NA
LOC18045035	protein disulfide-isomerase C17H9.14c	-9.84003	2.92364	6.16947e-12	4.0952e-11	NA	NA	NA	NA
LOC18041794	UPF0481 protein At3g47200	-9.80762	2.91935	1.01121e-11	6.636e-11	NA	NA	NA	NA
LOC18047696	endoglucanase 17	-9.80386	1.30496	1.69459e-15	1.383e-14	K01179	[EC:3.2.1.4]	cic00500	042
LOC18033164	putative F-box protein PP2-B12	9.78859	2.54438	5.28267e-12	3.52342e-11	NA	NA	NA	NA
LOC112096859	mitochondrial carrier protein MTM1-like	-9.7854	0.969603	5.40338e-20	5.48325e-19	NA	NA	NA	NA
LOC18037094	uncharacterized LOC18037094	-9.75881	2.90564	5.57848e-12	3.7112e-11	NA	NA	NA	NA
LOC18052887	UPF0481 protein At3g47200	-9.74288	2.9133	1.23897e-11	8.07467e-11	NA	NA	NA	NA
LOC112099690	2-oxoglutarate-dependent dioxygenase mpl2-like	9.73455	0.82769	2.77369e-27	3.85702e-26	NA	NA	NA	NA
LOC18054408	G-type lectin S-receptor-like serine/threonine-protein kinase At4g27290	-9.70972	2.89933	6.96565e-12	4.61045e-11	NA	NA	NA	NA
LOC18042779	cytochrome P450 CYP82D47	9.70496	0.829557	4.14937e-27	5.7203e-26	NA	NA	NA	NA
LOC18031860	probable glutathione S-transferase	9.70173	2.54285	1.08901e-11	7.12412e-11	K00799	[EC:2.5.1.18]	cic00480	041
LOC112100964	uncharacterized LOC112100964	9.68784	2.44816	1.81377e-12	1.23833e-11	NA	NA	NA	NA
LOC112098106	probable LRR receptor-like serine/threonine-protein kinase At1g34110	9.6821	3.03827	4.91432e-10	2.88467e-09	NA	NA	NA	NA
LOC18032490	heat stress transcription factor A-6b	-9.66518	2.90248	1.48291e-11	9.61929e-11	K09419	NA	NA	NA
LOC112100741	probable LRR receptor-like serine/threonine-protein kinase At3g47570	-9.65679	2.9055	2.00819e-11	1.29459e-10	NA	NA	NA	NA
LOC18039952	tropinone reductase-like 1	9.65567	2.54759	2.63526e-12	1.78746e-11	NA	NA	NA	NA
LOC112096162	serine carboxypeptidase-like 12	-9.65549	2.90143	1.56629e-11	1.01474e-10	NA	NA	NA	NA
LOC18047663	protein SIEVE ELEMENT OCCLUSION B	-9.64863	2.89586	1.20309e-11	7.84327e-11	NA	NA	NA	NA
LOC18034975	4-coumarate--CoA ligase-like 7	-9.6443	2.92467	8.11781e-11	5.03053e-10	K01904	[EC:6.2.1.12]	cic00130;cic00940	013;081
LOC112100009	beta-glucosidase 11-like	9.6184	1.26087	1.42264e-13	1.03661e-12	NA	NA	NA	NA
LOC18040529	BAHD acyltransferase BIA1	9.60371	1.3334	3.43737e-14	2.60691e-13	NA	NA	NA	NA
LOC18040371	sugar transporter ERD6-like 18	9.5966	2.38605	2.06328e-12	1.40683e-11	NA	NA	NA	NA
LOC18038923	riboflavin biosynthesis protein PYRD, chloroplastic	-9.58394	2.8934	2.35913e-11	1.51379e-10	NA	NA	NA	NA
LOC18037287	aldehyde dehydrogenase family 3 member F1	-9.5736	2.8794	1.08151e-11	7.0817e-11	K00128	[EC:1.2.1.3]	cic00010;cic00053;cic00071;cic00280;cic00310;cic00330;cic00340;cic00380;cic00410;cic00561;cic00620;cic00770;cic00903	001;007;010;025;028;029;030;033;035;047;057;068;073
LOC18046164	LRR receptor-like serine/threonine-protein kinase FLS2	-9.56462	2.9004	4.59341e-11	2.8904e-10	NA	NA	NA	NA
LOC18038813	F-box/FBD/LRR-repeat protein At5g53840	-9.55341	2.87712	1.30978e-11	8.52543e-11	NA	NA	NA	NA
LOC18050006	caffeic acid 3-O-methyltransferase 1	9.5385	1.31181	3.06561e-14	2.33348e-13	K13066	[EC:2.1.1.68 2.1.1.4]	cic00380;cic00940	033;081
LOC18048704	expansin-like B1	-9.53326	1.30614	1.19213e-14	9.32327e-14	NA	NA	NA	NA
LOC18037635	protein DETOXIFICATION 27	-9.51588	0.805697	2.74737e-27	3.82297e-26	K03327	NA	NA	NA
LOC18036830	probable disease resistance protein At1g61300	-9.51401	1.29716	8.79231e-15	6.90213e-14	NA	NA	NA	NA
LOC112096722	uncharacterized LOC112096722	-9.50678	2.88042	2.62362e-11	1.67678e-10	NA	NA	NA	NA
LOC18036902	G-type lectin S-receptor-like serine/threonine-protein kinase RLK1	-9.50548	2.87486	2.39521e-11	1.53552e-10	NA	NA	NA	NA
LOC18048915	protein HOTHEAD	9.48566	0.498513	2.135e-70	1.00485e-68	NA	NA	NA	NA
LOC18033632	subtilisin-like protease SBT1.7	-9.47142	2.88776	6.63426e-11	4.13707e-10	NA	NA	NA	NA
LOC18050960	non-specific lipid-transfer protein	-9.45154	2.92775	6.88443e-10	4.00943e-09	NA	NA	NA	NA
LOC112098225	uncharacterized LOC112098225	9.448	2.57184	1.67663e-11	1.08522e-10	NA	NA	NA	NA
LOC18048154	licodione synthase	-9.44341	0.520553	3.74408e-64	1.54388e-62	K23179	[EC:1.14.19.76]	cic00941;cic00943	082;084
LOC18043997	probable xyloglucan endotransglucosylase/hydrolase protein 33	9.4388	0.467651	8.11904e-79	4.49203e-77	K08235	[EC:2.4.1.207]	NA	NA
LOC112098981	uncharacterized LOC112098981	-9.43454	2.84475	4.50169e-11	2.83612e-10	NA	NA	NA	NA
LOC18052679	MLP-like protein 43	9.42408	3.25169	0.000203738	0.0007555	NA	NA	NA	NA
LOC112098333	protein ENHANCED DISEASE RESISTANCE 2-like	-9.41791	2.91646	4.44302e-10	2.62133e-09	NA	NA	NA	NA
LOC18038096	GDSL esterase/lipase At1g09390	-9.41617	1.30351	2.38997e-14	1.83126e-13	NA	NA	NA	NA
LOC18034899	protein TOPLESS	9.41272	0.990203	6.51714e-18	6.03633e-17	NA	NA	NA	NA
LOC18046941	disease resistance RPP13-like protein 4	9.41125	3.13813	8.06004e-06	3.44722e-05	NA	NA	NA	NA
LOC112095462	glycine-rich cell wall structural protein-like	-9.39736	2.84661	3.11587e-11	1.98043e-10	NA	NA	NA	NA
LOC18042368	7-deoxyloganetin glucosyltransferase	-9.38987	2.86507	5.29658e-11	3.31982e-10	NA	NA	NA	NA
LOC18043148	uncharacterized LOC18043148	-9.38618	2.90759	4.01943e-10	2.37816e-09	NA	NA	NA	NA
LOC112097181	uncharacterized LOC112097181	-9.3843	2.84739	3.9205e-11	2.47671e-10	NA	NA	NA	NA
LOC18039803	ABC transporter G family member 20	-9.38144	2.87901	1.10829e-10	6.79511e-10	NA	NA	NA	NA
LOC112095908	uncharacterized LOC112095908	9.37774	2.55529	3.14852e-11	1.99935e-10	NA	NA	NA	NA
LOC112100370	pectinesterase inhibitor-like	9.36465	2.70666	4.45296e-10	2.62571e-09	NA	NA	NA	NA
LOC18053044	beta-glucosidase 24	9.36079	1.34606	1.46875e-13	1.06909e-12	NA	NA	NA	NA
LOC112101136	uncharacterized LOC112101136	9.35615	2.44909	1.35429e-11	8.80416e-11	NA	NA	NA	NA
LOC18041202	photosystem I chlorophyll a/b-binding protein 5, chloroplastic	-9.33983	1.30177	3.37388e-14	2.55969e-13	K08911	NA	cic00196	016
LOC112098955	uncharacterized LOC112098955	-9.33826	2.87301	9.26766e-11	5.72772e-10	NA	NA	NA	NA
LOC18041921	uncharacterized LOC18041921	9.3356	2.39316	5.37261e-12	3.57996e-11	NA	NA	NA	NA
LOC18032752	uncharacterized LOC18032752	-9.3315	0.810981	5.13473e-26	6.79935e-25	NA	NA	NA	NA
LOC112098988	uncharacterized LOC112098988	-9.32269	2.87148	7.77445e-11	4.8235e-10	NA	NA	NA	NA
LOC18045148	protein disulfide isomerase-like 1-4	-9.31386	2.86887	1.24556e-10	7.60535e-10	K09580	[EC:5.3.4.1]	cic04141	112
LOC18038448	ankyrin repeat-containing protein ITN1	-9.30552	2.86811	1.13247e-10	6.93723e-10	NA	NA	NA	NA
LOC18051862	glutaredoxin-C9	-9.29745	2.86012	2.06428e-10	1.24437e-09	K03676	NA	NA	NA
LOC112096188	shikimate O-hydroxycinnamoyltransferase-like	-9.29291	1.29091	3.66707e-14	2.77707e-13	NA	NA	NA	NA
LOC18053327	uncharacterized protein At4g04980	-9.28106	1.29633	4.20462e-14	3.16571e-13	NA	NA	NA	NA
LOC112098868	uncharacterized LOC112098868	-9.26322	2.84669	8.71613e-11	5.39487e-10	NA	NA	NA	NA
LOC18044368	cytosolic sulfotransferase 12	-9.2398	2.85155	1.19512e-10	7.30843e-10	NA	NA	NA	NA
LOC18052680	protein PLANT CADMIUM RESISTANCE 2	9.2213	1.33114	3.80802e-13	2.71017e-12	NA	NA	NA	NA
LOC18035157	geraniol 8-hydroxylase	9.21272	3.1866	0.000222625	0.000821874	NA	NA	NA	NA
LOC18039436	uncharacterized protein At4g19900	-9.20783	2.88017	4.90989e-10	2.88288e-09	K01988	[EC:2.4.1.228]	cic00603	055
LOC18039125	gamma-interferon-inducible lysosomal thiol reductase	-9.19968	2.8642	4.26061e-10	2.51728e-09	NA	NA	NA	NA
LOC112101210	uncharacterized LOC112101210	-9.19653	0.982439	2.19844e-17	1.97641e-16	NA	NA	NA	NA
LOC18047173	protein YLS3	-9.17777	2.83832	1.40883e-10	8.57707e-10	NA	NA	NA	NA
LOC18053836	uncharacterized LOC18053836	9.17609	1.33828	4.46248e-13	3.16512e-12	NA	NA	NA	NA
LOC18033356	UDP-glycosyltransferase 88B1	-9.17406	0.34525	1.52623e-135	2.33458e-133	NA	NA	NA	NA
LOC112095800	uncharacterized LOC112095800	-9.17229	2.8602	3.62906e-10	2.1527e-09	NA	NA	NA	NA
LOC18035878	uncharacterized LOC18035878	-9.16556	1.29097	7.16186e-14	5.31341e-13	NA	NA	NA	NA
LOC18048466	disease resistance-like protein DSC1	9.13471	0.94904	1.04181e-17	9.5391e-17	NA	NA	NA	NA
LOC112100210	uncharacterized LOC112100210	-9.13382	2.84407	2.19695e-10	1.31937e-09	NA	NA	NA	NA
LOC112096258	uncharacterized LOC112096258	-9.12055	0.816456	1.36276e-24	1.72547e-23	NA	NA	NA	NA
LOC18037895	anthocyanidin 3-O-glucosyltransferase 2	-9.11781	2.86934	1.03593e-09	5.97294e-09	NA	NA	NA	NA
LOC112097433	uncharacterized LOC112097433	-9.1101	2.8158	1.11131e-10	6.81163e-10	NA	NA	NA	NA
LOC112101597	uncharacterized LOC112101597	9.11002	0.950695	1.56461e-17	1.42133e-16	NA	NA	NA	NA
LOC18039745	7-deoxyloganetic acid glucosyltransferase	-9.1046	2.84296	2.6698e-10	1.59689e-09	NA	NA	NA	NA
LOC112100768	uncharacterized LOC112100768	-9.1022	0.636033	8.34008e-40	1.76141e-38	NA	NA	NA	NA
LOC18055263	F-box/FBD/LRR-repeat protein At5g53840	-9.08849	2.82303	1.28697e-10	7.85357e-10	NA	NA	NA	NA
LOC18032506	UPF0481 protein At3g47200	9.07386	0.822677	8.1104e-24	9.94229e-23	NA	NA	NA	NA
LOC18052826	tyrosine aminotransferase	-9.06305	1.29642	1.79833e-13	1.30305e-12	K00815	[EC:2.6.1.5]	cic00130;cic00270;cic00350;cic00360;cic00400;cic00950;cic00960	013;024;031;032;034;087;088
LOC112101470	uncharacterized LOC112101470	-9.02565	2.82175	2.40265e-10	1.44041e-09	NA	NA	NA	NA
LOC18050571	WAT1-related protein At4g15540	-8.9997	2.83884	5.46795e-10	3.20512e-09	NA	NA	NA	NA
LOC112099231	uncharacterized LOC112099231	-8.99476	2.83626	6.71031e-10	3.91131e-09	NA	NA	NA	NA
LOC18036265	probably inactive leucine-rich repeat receptor-like protein kinase At3g28040	-8.98613	2.82576	4.4941e-10	2.64921e-09	NA	NA	NA	NA
LOC112101114	uncharacterized LOC112101114	-8.97828	0.811315	4.54531e-24	5.64514e-23	NA	NA	NA	NA
LOC18052064	uncharacterized LOC18052064	8.97091	2.98595	2.5721e-08	1.34915e-07	NA	NA	NA	NA
LOC18035936	probable disease resistance protein At5g63020	-8.97048	2.8176	3.51705e-10	2.08924e-09	NA	NA	NA	NA
LOC18051585	ADP,ATP carrier protein 1, mitochondrial	8.95217	2.60163	4.27917e-09	2.36817e-08	K05863	NA	NA	NA
LOC18049781	E3 ubiquitin-protein ligase MARCH11	8.95077	0.825328	2.9078e-23	3.47849e-22	NA	NA	NA	NA
LOC18055737	uncharacterized LOC18055737	-8.94189	2.80359	4.28545e-10	2.53124e-09	NA	NA	NA	NA
LOC18049599	uncharacterized LOC18049599	8.93292	2.99162	4.23273e-08	2.18387e-07	NA	NA	NA	NA
LOC18053055	uncharacterized LOC18053055	-8.92693	2.83404	1.29307e-09	7.40225e-09	NA	NA	NA	NA
LOC18034902	17.3 kDa class I heat shock protein	-8.92669	0.585241	4.22838e-45	1.05598e-43	K13993	NA	cic04141	112
LOC112096259	pollen-specific leucine-rich repeat extensin-like protein 4	8.9159	2.47456	2.14829e-10	1.29277e-09	NA	NA	NA	NA
LOC18046561	PE-PGRS family protein PE_PGRS33	-8.91278	0.203773	0	0	NA	NA	NA	NA
LOC18035618	lysosomal Pro-X carboxypeptidase	-8.91234	0.557658	4.88006e-50	1.38878e-48	K01285	[EC:3.4.16.2]	NA	NA
LOC112096862	uncharacterized LOC112096862	-8.91164	2.80537	3.54451e-10	2.10495e-09	NA	NA	NA	NA
LOC112101121	glucan endo-1,3-beta-glucosidase 11-like	8.90597	1.25508	3.52373e-13	2.51214e-12	NA	NA	NA	NA
LOC112100269	uncharacterized LOC112100269	8.89658	1.26997	6.21932e-13	4.36654e-12	NA	NA	NA	NA
LOC18037346	LRR receptor-like serine/threonine-protein kinase HSL2	8.89365	1.3163	1.40921e-12	9.71046e-12	NA	NA	NA	NA
LOC18037251	probable disease resistance protein At5g43730	-8.88411	0.635945	6.3772e-38	1.26227e-36	NA	NA	NA	NA
LOC112100297	uncharacterized LOC112100297	8.8834	1.67452	1.74621e-08	9.28828e-08	NA	NA	NA	NA
LOC18034881	isoflavone reductase homolog PCBER	8.87895	0.537802	4.59387e-53	1.39717e-51	K23050	[EC:1.3.1.-]	NA	NA
LOC18032288	probable glutathione S-transferase	-8.87746	0.815163	2.5826e-23	3.09659e-22	K00799	[EC:2.5.1.18]	cic00480	041
LOC18034500	uncharacterized LOC18034500	-8.86861	1.29386	5.59696e-13	3.94022e-12	NA	NA	NA	NA
LOC18053613	receptor-like protein EIX2	-8.8589	2.79811	5.52121e-10	3.23543e-09	K13466	NA	cic04626	116
LOC18041865	3-oxo-Delta(4,5)-steroid 5-beta-reductase	8.85694	2.27173	2.67218e-11	1.70624e-10	K22419	[EC:1.3.1.3]	NA	NA
LOC18053707	lectin-like protein At3g16530	8.8418	0.404634	9.54261e-93	6.75221e-91	NA	NA	NA	NA
LOC18033129	F-box protein PP2-B3	8.81561	2.55653	3.28807e-09	1.83284e-08	NA	NA	NA	NA
LOC18049402	germin-like protein subfamily 1 member 17	8.81386	0.902193	5.32267e-20	5.40926e-19	NA	NA	NA	NA
LOC18043219	probable leucine-rich repeat receptor-like protein kinase At1g35710	8.80262	2.55192	2.05788e-09	1.16458e-08	NA	NA	NA	NA
LOC18052096	binding partner of ACD11 1	-8.80258	2.78846	4.88455e-10	2.86962e-09	NA	NA	NA	NA
LOC18044257	serine/threonine-protein kinase D6PKL2	-8.78481	2.80207	1.12603e-09	6.47449e-09	K08286	[EC:2.7.11.-]	NA	NA
LOC18053209	indole-3-acetic acid-amido synthetase GH3.6	-8.75566	0.973227	5.10886e-16	4.27684e-15	K14487	NA	cic04075	109
LOC18041428	protein SRG1	8.74772	2.52042	4.046e-09	2.24211e-08	NA	NA	NA	NA
LOC18050354	MDIS1-interacting receptor like kinase 2	-8.7473	2.80678	1.94538e-09	1.10272e-08	NA	NA	NA	NA
LOC18035713	cysteine proteinase COT44	-8.73772	0.312639	2.03711e-149	3.85255e-147	NA	NA	NA	NA
LOC18038632	protein HEADING DATE 3A	8.73237	1.84529	1.10775e-06	5.14845e-06	K16223	NA	cic04712	117
LOC18046345	auxin-induced protein 22D	-8.72608	0.973272	5.64391e-16	4.71907e-15	K14484	NA	cic04075	109
LOC18036888	probable disease resistance protein At4g27220	-8.72579	0.965452	3.98521e-16	3.35645e-15	NA	NA	NA	NA
LOC18046037	LRR receptor-like serine/threonine-protein kinase FLS2	-8.72464	2.78224	8.11416e-10	4.70716e-09	K13420	[EC:2.7.11.1]	cic04016;cic04626	107;116
LOC18052879	heavy metal-associated isoprenylated plant protein 6	8.71971	1.34231	8.92768e-12	5.87543e-11	NA	NA	NA	NA
LOC18039754	tropinone reductase homolog	-8.71638	0.268285	1.05897e-201	3.73384e-199	K08081	[EC:1.1.1.206]	cic00960	088
LOC18042019	uncharacterized LOC18042019	8.7118	2.86678	6.04358e-08	3.08148e-07	NA	NA	NA	NA
LOC18039714	stress-induced protein KIN2	8.70653	2.65038	1.41941e-08	7.60637e-08	NA	NA	NA	NA
LOC18035407	caffeic acid 3-O-methyltransferase	8.69295	1.32545	7.37483e-12	4.87198e-11	NA	NA	NA	NA
LOC112097725	LRR receptor-like serine/threonine-protein kinase GSO1	8.68107	1.29803	4.04306e-12	2.71578e-11	NA	NA	NA	NA
LOC112097026	chaperonin CPN60-2, mitochondrial-like	-8.67017	2.82692	9.06511e-09	4.91482e-08	NA	NA	NA	NA
LOC18046174	ent-copalyl diphosphate synthase, chloroplastic	-8.66652	2.7965	2.7398e-09	1.53546e-08	NA	NA	NA	NA
LOC18032803	uncharacterized LOC18032803	-8.6531	2.78785	2.13593e-09	1.2058e-08	NA	NA	NA	NA
LOC18043419	probable LRR receptor-like serine/threonine-protein kinase At3g47570	-8.65253	1.31586	5.39716e-12	3.59517e-11	NA	NA	NA	NA
LOC18047784	probable leucine-rich repeat receptor-like serine/threonine-protein kinase At3g14840	-8.64898	2.86696	4.03e-08	2.08392e-07	NA	NA	NA	NA
LOC18036214	probable disease resistance protein At5g63020	-8.6375	2.78489	2.15927e-09	1.21832e-08	NA	NA	NA	NA
LOC112098429	probable S-adenosylmethionine-dependent methyltransferase At5g37990	8.63622	2.38798	5.6438e-10	3.30262e-09	NA	NA	NA	NA
LOC112098473	uncharacterized LOC112098473	8.63112	0.42736	3.83235e-78	2.09801e-76	NA	NA	NA	NA
LOC18056157	transcription factor MYB36	-8.62445	2.79581	3.06687e-09	1.71275e-08	K09422	NA	NA	NA
LOC18054697	receptor-like protein EIX2	8.62404	2.85726	7.95553e-08	4.02478e-07	NA	NA	NA	NA
LOC18046422	transcription factor MYB52	-8.61792	0.981543	2.07465e-15	1.68656e-14	K09422	NA	NA	NA
LOC112095499	uncharacterized LOC112095499	-8.59171	2.78065	2.79511e-09	1.56561e-08	NA	NA	NA	NA
LOC18048328	uncharacterized protein At4g00950	8.58505	0.738011	1.0598e-26	1.43817e-25	NA	NA	NA	NA
LOC18033276	major allergen Pru ar 1	8.5768	1.57679	3.089e-08	1.61094e-07	NA	NA	NA	NA
LOC112100226	uncharacterized LOC112100226	-8.57205	2.77411	2.7076e-09	1.51782e-08	NA	NA	NA	NA
LOC18041395	TMV resistance protein N	8.5618	0.551594	2.1327e-46	5.47735e-45	NA	NA	NA	NA
LOC112096217	uncharacterized LOC112096217	8.55551	2.50037	2.55867e-09	1.43627e-08	NA	NA	NA	NA
LOC112100252	uncharacterized LOC112100252	8.54875	2.65585	3.36305e-09	1.87313e-08	NA	NA	NA	NA
LOC112097754	uncharacterized LOC112097754	8.54755	2.48061	6.71889e-09	3.67534e-08	NA	NA	NA	NA
LOC18038358	uncharacterized LOC18038358	8.54657	0.590249	1.31211e-40	2.84037e-39	NA	NA	NA	NA
LOC18031286	trehalose-phosphate phosphatase A	-8.53783	0.82116	2.41921e-21	2.62256e-20	K01087	[EC:3.1.3.12]	cic00500	042
LOC18035128	cyclin-D4-1	-8.53235	0.480108	9.19957e-61	3.45449e-59	K18810	NA	NA	NA
LOC18053375	flavonoid 3'-monooxygenase	-8.52601	2.7672	2.93259e-09	1.64085e-08	NA	NA	NA	NA
LOC18046257	21 kDa seed protein	8.52073	1.34076	3.7148e-11	2.35105e-10	NA	NA	NA	NA
LOC112098247	uncharacterized LOC112098247	8.51675	2.48993	4.2883e-09	2.37259e-08	NA	NA	NA	NA
LOC112096834	uncharacterized LOC112096834	-8.51605	2.76476	2.89493e-09	1.62065e-08	NA	NA	NA	NA
LOC18037489	histidine kinase 1	-8.51556	0.342083	1.51167e-118	1.71842e-116	NA	NA	NA	NA
LOC112098989	protein disulfide isomerase-like 1-4	-8.51513	2.74855	2.27411e-09	1.28172e-08	NA	NA	NA	NA
LOC18039381	uncharacterized acetyltransferase At3g50280	8.51476	0.995641	9.65596e-15	7.57154e-14	NA	NA	NA	NA
LOC18044658	beta-glucosidase 13	-8.51463	0.636146	8.95734e-35	1.60085e-33	K01188	[EC:3.2.1.21]	cic00460;cic00500;cic00999	039;042;091
LOC112098314	uncharacterized LOC112098314	8.49729	0.81032	2.0915e-21	2.27799e-20	NA	NA	NA	NA
LOC18045371	heat shock 70 kDa protein 18	-8.49489	0.97904	5.27504e-15	4.18842e-14	K03283	NA	cic04141;cic04144	112;113
LOC112096105	uncharacterized LOC112096105	8.49406	2.30694	3.32994e-10	1.98205e-09	NA	NA	NA	NA
LOC112096180	probable carboxylesterase 2	-8.48888	2.75627	3.38778e-09	1.8859e-08	NA	NA	NA	NA
LOC112098567	uncharacterized LOC112098567	8.4729	2.87899	3.45973e-07	1.6699e-06	NA	NA	NA	NA
LOC18037750	caffeic acid 3-O-methyltransferase	8.47252	0.407963	6.33291e-84	3.78574e-82	K13066	[EC:2.1.1.68 2.1.1.4]	cic00380;cic00940	033;081
LOC112096239	uncharacterized LOC112096239	-8.45655	2.77609	7.83533e-09	4.26809e-08	NA	NA	NA	NA
LOC112099002	zinc finger MYM-type protein 1-like	8.43483	2.47055	1.59941e-09	9.11078e-09	NA	NA	NA	NA
LOC18033684	uncharacterized LOC18033684	-8.42301	2.76341	6.50511e-09	3.56121e-08	NA	NA	NA	NA
LOC18049103	uncharacterized LOC18049103	-8.41956	1.32044	2.24767e-11	1.44494e-10	NA	NA	NA	NA
LOC112096770	protein BPS1, chloroplastic-like	-8.40817	2.79263	2.18457e-08	1.15461e-07	NA	NA	NA	NA
LOC18043814	putative receptor-like protein kinase At3g47110	8.38522	2.61247	1.57035e-07	7.76884e-07	NA	NA	NA	NA
LOC18031372	cyclic nucleotide-gated ion channel 1	8.37884	0.854066	1.9373e-19	1.9173e-18	K05391	NA	cic04626	116
LOC18035194	zinc finger MYM-type protein 1	8.35319	2.96922	8.10935e-07	3.80982e-06	NA	NA	NA	NA
LOC18035766	uncharacterized LOC18035766	-8.34886	2.75425	7.71896e-09	4.20801e-08	NA	NA	NA	NA
LOC18051386	uncharacterized LOC18051386	-8.34783	1.29553	1.43238e-11	9.29728e-11	NA	NA	NA	NA
LOC18031330	hexose carrier protein HEX6	-8.34616	1.30194	1.96143e-11	1.26523e-10	K24193	NA	NA	NA
LOC112100750	uncharacterized LOC112100750	-8.33069	2.75733	1.12717e-08	6.07475e-08	NA	NA	NA	NA
LOC18031839	1-aminocyclopropane-1-carboxylate oxidase homolog 1	-8.32295	2.74386	9.61078e-09	5.19847e-08	NA	NA	NA	NA
LOC18039156	protein ABSCISIC ACID-INSENSITIVE 5	-8.32132	1.27654	1.08668e-11	7.11113e-11	K14432	NA	cic04075	109
LOC18042308	serine carboxypeptidase-like 7	8.31834	0.57762	7.77047e-42	1.76666e-40	K16296	[EC:3.4.16.-]	NA	NA
LOC18031363	probable trehalose-phosphate phosphatase C	8.30577	0.853248	5.27151e-19	5.13164e-18	K01087	[EC:3.1.3.12]	cic00500	042
LOC112097217	uncharacterized LOC112097217	-8.30034	2.74888	1.19246e-08	6.41829e-08	NA	NA	NA	NA
LOC18051202	probable LRR receptor-like serine/threonine-protein kinase At3g47570	-8.30011	0.646373	4.53701e-32	7.40843e-31	NA	NA	NA	NA
LOC18054426	uncharacterized LOC18054426	-8.28787	2.75265	1.53674e-08	8.21608e-08	NA	NA	NA	NA
LOC112097755	uncharacterized LOC112097755	-8.27874	2.79336	5.57667e-08	2.84901e-07	NA	NA	NA	NA
LOC112098518	nuclear intron maturase 4, mitochondrial-like	-8.27752	2.79986	6.84959e-08	3.48051e-07	NA	NA	NA	NA
LOC18035053	uncharacterized LOC18035053	-8.27185	0.829488	9.30777e-20	9.32256e-19	K07025	NA	NA	NA
LOC18036262	transcription factor WER	-8.27091	1.29744	2.45219e-11	1.57011e-10	K09422	NA	NA	NA
LOC18055487	lectin	-8.26594	1.04806	1.22494e-13	8.9506e-13	NA	NA	NA	NA
LOC112100371	putative defensin-like protein 20	-8.25666	2.79984	1.23586e-07	6.15799e-07	NA	NA	NA	NA
LOC18033395	zinc finger A20 and AN1 domain-containing stress-associated protein 10	8.25646	2.74725	2.75241e-07	1.33781e-06	NA	NA	NA	NA
LOC18045345	cytochrome P450 89A2	8.24117	0.293477	1.87521e-149	3.5789e-147	K24184	[EC:1.14.-.-]	NA	NA
LOC112096853	2-oxoisovalerate dehydrogenase subunit beta 1, mitochondrial-like	8.23674	2.98285	1.92647e-06	8.76369e-06	NA	NA	NA	NA
LOC18045181	uncharacterized LOC18045181	8.22274	1.0065	1.12472e-13	8.23569e-13	NA	NA	NA	NA
LOC18043107	probable glucan endo-1,3-beta-glucosidase BG4	-8.2125	2.79936	1.11213e-07	5.56277e-07	NA	NA	NA	NA
LOC18033572	cyclic nucleotide-gated ion channel 1	-8.21208	1.29431	3.30632e-11	2.09699e-10	K05391	NA	cic04626	116
LOC112100331	uncharacterized LOC112100331	8.21009	2.61775	7.44722e-08	3.7768e-07	NA	NA	NA	NA
LOC112097627	chaperonin CPN60, mitochondrial-like	-8.20971	2.72574	9.79462e-09	5.29653e-08	NA	NA	NA	NA
LOC112099096	uncharacterized LOC112099096	-8.19132	2.70242	1.21081e-08	6.51538e-08	NA	NA	NA	NA
LOC18032262	short-chain dehydrogenase TIC 32, chloroplastic	8.16297	0.846163	9.24688e-19	8.89745e-18	NA	NA	NA	NA
LOC18038272	MKI67 FHA domain-interacting nucleolar phosphoprotein	8.16184	2.56466	3.43763e-08	1.78559e-07	K14838	NA	NA	NA
LOC18041295	uncharacterized LOC18041295	-8.15954	2.73373	2.03015e-08	1.07546e-07	NA	NA	NA	NA
LOC18046375	uncharacterized LOC18046375	-8.15336	2.72519	1.68893e-08	8.99508e-08	NA	NA	NA	NA
LOC18047430	36.4 kDa proline-rich protein	-8.15247	0.351609	9.47584e-103	8.11217e-101	NA	NA	NA	NA
LOC112097062	uncharacterized LOC112097062	-8.15043	1.29048	4.04963e-11	2.55519e-10	NA	NA	NA	NA
LOC112097637	uncharacterized LOC112097637	-8.12766	2.72124	1.71599e-08	9.13452e-08	NA	NA	NA	NA
LOC18044330	uncharacterized LOC18044330	8.12341	0.740446	1.07058e-23	1.30547e-22	NA	NA	NA	NA
LOC18033435	protein STRICTOSIDINE SYNTHASE-LIKE 2	8.11977	1.0417	1.26398e-12	8.72707e-12	NA	NA	NA	NA
LOC18039966	sodium/hydrogen exchanger 6	-8.11347	0.714128	2.99594e-25	3.87109e-24	NA	NA	NA	NA
LOC18042762	magnesium transporter MRS2-3	8.11181	0.978159	1.34073e-13	9.77613e-13	NA	NA	NA	NA
LOC18050733	ankyrin repeat-containing protein At5g02620	8.10558	2.68417	6.72977e-07	3.1818e-06	NA	NA	NA	NA
LOC112099301	NAC domain-containing protein 7-like	-8.1037	2.7691	9.46102e-08	4.75749e-07	NA	NA	NA	NA
LOC112096791	heat shock 70 kDa protein 17-like	-8.10361	2.72102	2.42735e-08	1.27677e-07	NA	NA	NA	NA
LOC18051600	disease resistance protein RPM1	-8.10211	2.72615	2.48274e-08	1.30458e-07	K13457	NA	cic04626	116
LOC112098189	protein NAR1-like	8.10008	2.71638	2.00517e-07	9.86138e-07	NA	NA	NA	NA
LOC18053416	BAG family molecular chaperone regulator 2	-8.09288	2.71434	1.75255e-08	9.31962e-08	NA	NA	NA	NA
LOC18040354	receptor-like protein 12	8.08856	0.766336	1.90226e-22	2.18755e-21	NA	NA	NA	NA
LOC18037982	probable acyl-activating enzyme 12, peroxisomal	-8.08643	0.638144	4.09065e-31	6.48118e-30	K23618	[EC:6.2.1.2 6.2.1.-]	NA	NA
LOC18054406	G-type lectin S-receptor-like serine/threonine-protein kinase At4g27290	-8.06896	2.71933	2.43905e-08	1.28227e-07	NA	NA	NA	NA
LOC112099547	uncharacterized LOC112099547	-8.06648	2.83486	6.01864e-07	2.85402e-06	NA	NA	NA	NA
LOC18038228	VQ motif-containing protein 17	-8.05574	2.72317	3.27502e-08	1.70496e-07	NA	NA	NA	NA
LOC18037187	uncharacterized LOC18037187	8.05354	2.64306	3.97972e-07	1.91245e-06	NA	NA	NA	NA
LOC18036396	uncharacterized LOC18036396	-8.05	1.29265	7.73556e-11	4.8008e-10	NA	NA	NA	NA
LOC18033719	lysine-specific demethylase JMJ25	-8.04652	2.70503	1.86353e-08	9.8971e-08	K15601	[EC:1.14.11.65]	NA	NA
LOC18034927	phosphatidylinositol/phosphatidylcholine transfer protein SFH3	-8.04547	0.996053	2.65743e-13	1.9063e-12	NA	NA	NA	NA
LOC18049412	germin-like protein subfamily 1 member 17	8.03443	0.55364	2.004e-40	4.30674e-39	NA	NA	NA	NA
LOC18053302	probable sulfate transporter 3.3	8.03111	0.394211	1.32854e-79	7.42948e-78	K17471	NA	NA	NA
LOC18038197	aldose 1-epimerase	-8.02312	2.72277	3.9081e-08	2.0234e-07	K01785	[EC:5.1.3.3]	cic00010;cic00052	001;006
LOC18055255	F-box/LRR-repeat protein At3g58900	-8.02243	2.76449	1.47263e-07	7.30975e-07	NA	NA	NA	NA
LOC18040575	copper transport protein ATX1	8.01662	0.215636	1.87099e-260	1.21632e-257	NA	NA	NA	NA
LOC112096806	uncharacterized LOC112096806	-8.00098	2.7126	2.94593e-08	1.53826e-07	NA	NA	NA	NA
LOC18039663	tropinone reductase homolog	-7.98632	0.808278	3.62352e-19	3.54897e-18	K08081	[EC:1.1.1.206]	cic00960	088
LOC18033947	squalene monooxygenase	-7.9841	2.73908	9.44912e-08	4.75266e-07	K00511	[EC:1.14.14.17]	cic00100;cic00909	012;078
LOC18038801	UPF0481 protein At3g47200	-7.98339	2.69631	2.32107e-08	1.22365e-07	NA	NA	NA	NA
LOC18053589	alpha-farnesene synthase	-7.98073	2.75493	1.43891e-07	7.15087e-07	K14173	[EC:4.2.3.46]	cic00909	078
LOC18031462	gamma-glutamyl hydrolase 1	-7.96404	0.828037	2.1344e-18	2.01919e-17	NA	NA	NA	NA
LOC18041665	amino acid permease 2	-7.96269	2.75109	1.51706e-07	7.51772e-07	K24917	NA	NA	NA
LOC112096889	uncharacterized LOC112096889	7.95711	2.97444	5.90027e-06	2.55715e-05	NA	NA	NA	NA
LOC18042392	precursor of CEP9	-7.94801	2.79181	4.6525e-07	2.22292e-06	NA	NA	NA	NA
LOC18052412	calcium-binding protein PBP1	-7.93684	1.30424	2.16545e-10	1.30196e-09	K24345	NA	NA	NA
LOC18049794	uncharacterized LOC18049794	-7.92448	0.965485	1.89044e-13	1.36789e-12	NA	NA	NA	NA
LOC18041157	protein ANTHESIS POMOTING FACTOR 1	-7.91935	0.440775	6.92713e-62	2.6986e-60	K14962	NA	cic03015	095
LOC18053450	putative fasciclin-like arabinogalactan protein 20	-7.91016	2.69445	4.05765e-08	2.09665e-07	NA	NA	NA	NA
LOC18033833	proline-rich protein 4	7.90946	0.339523	2.62591e-104	2.28564e-102	NA	NA	NA	NA
LOC18031891	pectinesterase inhibitor	-7.90929	2.88932	3.95794e-06	1.74369e-05	NA	NA	NA	NA
LOC18054829	cytochrome P450 734A1	-7.89686	0.811381	1.00656e-18	9.66286e-18	K15639	[EC:1.14.-.-]	cic00905	075
LOC18039272	probable F-box protein At2g36090	-7.89215	2.80952	9.15002e-07	4.27748e-06	NA	NA	NA	NA
LOC18035419	UDP-glycosyltransferase 83A1	-7.88957	2.81473	1.04016e-06	4.84732e-06	NA	NA	NA	NA
LOC18043497	ABC transporter G family member 6	-7.88677	0.710861	4.94606e-24	6.12822e-23	NA	NA	NA	NA
LOC112100270	uncharacterized LOC112100270	-7.88271	2.68598	3.09133e-08	1.61175e-07	NA	NA	NA	NA
LOC18039779	expansin-A23	-7.87432	2.72179	1.189e-07	5.93585e-07	NA	NA	NA	NA
LOC18043945	caffeic acid 3-O-methyltransferase	7.87345	0.664083	1.31812e-27	1.85527e-26	NA	NA	NA	NA
LOC112097259	uncharacterized LOC112097259	-7.87192	2.83488	1.61254e-06	7.38566e-06	NA	NA	NA	NA
LOC18052392	cytochrome P450 77A4	-7.86384	0.314846	2.97928e-118	3.36836e-116	K21995	[EC:1.14.-.-]	cic00073	011
LOC18034801	sodium/proton antiporter 1	-7.8622	2.70759	8.9993e-08	4.53299e-07	NA	NA	NA	NA
LOC112101533	uncharacterized LOC112101533	-7.86002	0.962389	2.81117e-13	2.01449e-12	NA	NA	NA	NA
LOC18050685	transcription factor WER	-7.85554	2.7036	8.6431e-08	4.35884e-07	K09422	NA	NA	NA
LOC18041856	alpha-crystallin domain-containing protein 22.3	-7.85066	2.83721	1.93505e-06	8.79694e-06	NA	NA	NA	NA
LOC18033578	uncharacterized LOC18033578	-7.84883	2.69451	6.41304e-08	3.26347e-07	NA	NA	NA	NA
LOC18033907	U-box domain-containing protein 44	7.83989	2.65996	8.85115e-07	4.14055e-06	NA	NA	NA	NA
LOC18036844	protein WALLS ARE THIN 1	7.82042	2.86972	7.21758e-06	3.09965e-05	NA	NA	NA	NA
LOC18035085	UDP-glucose iridoid glucosyltransferase	-7.81578	0.971843	5.67866e-13	3.99368e-12	NA	NA	NA	NA
LOC112095745	zinc finger BED domain-containing protein RICESLEEPER 1-like	7.80604	2.85168	5.16684e-06	2.2496e-05	NA	NA	NA	NA
LOC18055922	shikimate O-hydroxycinnamoyltransferase	-7.79464	2.80696	1.46594e-06	6.73648e-06	K13065	[EC:2.3.1.133]	cic00940;cic00941;cic00945	081;082;086
LOC18036422	cytochrome P450 71A1	-7.79028	0.590632	9.04867e-34	1.56605e-32	K20623	NA	cic00905	075
LOC18031421	cytochrome P450 76M5	7.77819	0.189092	0	0	NA	NA	NA	NA
LOC18046238	E3 ubiquitin-protein ligase SIRP1	-7.75938	2.70008	1.47918e-07	7.33875e-07	K11982	[EC:2.3.2.27]	NA	NA
LOC18045067	cytochrome P450 78A5	-7.75756	2.74958	5.79514e-07	2.75243e-06	K20619	NA	NA	NA
LOC18053500	MLP-like protein 43	7.73887	0.341288	7.88062e-99	6.35428e-97	NA	NA	NA	NA
LOC112100064	uncharacterized LOC112100064	-7.73838	2.6719	6.60063e-08	3.35647e-07	NA	NA	NA	NA
LOC18043477	uncharacterized LOC18043477	-7.738	2.66815	8.9892e-08	4.529e-07	NA	NA	NA	NA
LOC112097790	putative disease resistance protein RGA1	7.7372	0.529709	4.26666e-41	9.44248e-40	NA	NA	NA	NA
LOC18046702	uncharacterized LOC18046702	-7.73578	0.959459	5.88468e-13	4.13298e-12	NA	NA	NA	NA
LOC112096808	uncharacterized LOC112096808	7.73451	0.811634	8.68763e-18	7.98978e-17	NA	NA	NA	NA
LOC18054772	indole-3-acetic acid-amido synthetase GH3.6	-7.72401	0.98286	1.53036e-12	1.05e-11	K14487	NA	cic04075	109
LOC18035398	aquaporin AQPAn.G	7.71836	0.35922	1.29515e-87	8.29017e-86	NA	NA	NA	NA
LOC18038354	ABC transporter B family member 15	-7.71661	0.58606	1.9515e-33	3.33035e-32	K05658	[EC:7.6.2.2]	cic02010	092
LOC112100843	extensin-like	7.71387	2.99386	1.98772e-05	8.19635e-05	NA	NA	NA	NA
LOC18040405	NAD(P)H-quinone oxidoreductase subunit N, chloroplastic	-7.71156	1.29071	4.86975e-10	2.86254e-09	NA	NA	NA	NA
LOC18034558	pathogenesis-related protein PR-4	7.70918	0.16186	0	0	NA	NA	NA	NA
LOC18042311	subtilisin-like protease SBT4.3	-7.68271	2.85652	5.66704e-06	2.46069e-05	NA	NA	NA	NA
LOC18037613	sodium/hydrogen exchanger 6	-7.67625	0.555573	8.05503e-37	1.53311e-35	NA	NA	NA	NA
LOC18051133	putative MO25-like protein At5g47540	-7.67616	2.66904	9.73291e-08	4.89185e-07	NA	NA	NA	NA
LOC18047368	F-box/kelch-repeat protein At1g74510	-7.67613	0.964875	1.13497e-12	7.85715e-12	NA	NA	NA	NA
LOC112097626	chaperonin CPN60-2, mitochondrial-like	-7.6653	2.67965	9.37631e-08	4.71718e-07	NA	NA	NA	NA
LOC18048273	sulfate transporter 3.1	-7.6448	0.462869	5.0016e-52	1.49495e-50	K17471	NA	NA	NA
LOC112097925	disease resistance protein RGA2-like	7.64123	0.442038	7.05102e-57	2.37735e-55	NA	NA	NA	NA
LOC112097674	uncharacterized LOC112097674	7.63929	3.00145	2.81344e-05	0.000114245	NA	NA	NA	NA
LOC18046383	dirigent protein 5	7.63392	1.83979	9.53892e-06	4.04811e-05	NA	NA	NA	NA
LOC18047048	transcription factor MYC2	-7.62746	0.466545	5.45493e-51	1.58934e-49	NA	NA	NA	NA
LOC18045329	GDSL esterase/lipase At1g29670	-7.62605	0.975586	2.51751e-12	1.70926e-11	NA	NA	NA	NA
LOC18040937	protein SRC2 homolog	-7.61328	2.68466	2.61705e-07	1.2756e-06	NA	NA	NA	NA
LOC18047100	uncharacterized LOC18047100	-7.6127	2.65722	1.23178e-07	6.13914e-07	NA	NA	NA	NA
LOC18055262	F-box/LRR-repeat protein At3g03030	-7.59815	2.67032	2.12411e-07	1.04217e-06	NA	NA	NA	NA
LOC18041762	receptor homology region, transmembrane domain- and RING domain-containing protein 1	-7.59491	1.27557	5.92854e-10	3.46436e-09	K15692	[EC:2.3.2.27]	NA	NA
LOC18032722	uncharacterized LOC18032722	-7.5919	0.807011	1.97114e-17	1.77513e-16	NA	NA	NA	NA
LOC112101025	protein FAR1-RELATED SEQUENCE 5-like	7.58751	2.99985	3.28164e-05	0.000132123	NA	NA	NA	NA
LOC18050002	uncharacterized LOC18050002	7.58311	1.28903	1.71565e-09	9.74624e-09	NA	NA	NA	NA
LOC18039588	uncharacterized LOC18039588	-7.57838	0.564831	8.00668e-35	1.43589e-33	NA	NA	NA	NA
LOC112101534	uncharacterized LOC112101534	-7.57688	2.65436	1.47035e-07	7.30018e-07	NA	NA	NA	NA
LOC112098372	uncharacterized LOC112098372	-7.56713	2.74625	1.36892e-06	6.31155e-06	NA	NA	NA	NA
LOC18051888	probable zinc transporter 10	7.55399	0.52406	1.06999e-40	2.32834e-39	K14709	NA	NA	NA
LOC18055643	uncharacterized protein DDB_G0271670	-7.55297	2.68822	4.11155e-07	1.97261e-06	NA	NA	NA	NA
LOC18053991	uncharacterized LOC18053991	-7.54344	0.407459	5.38698e-65	2.26395e-63	NA	NA	NA	NA
LOC112100244	uncharacterized LOC112100244	-7.53824	0.719878	1.39128e-21	1.53624e-20	NA	NA	NA	NA
LOC18035118	18.1 kDa class I heat shock protein	-7.53565	1.29707	1.51337e-09	8.63482e-09	K13993	NA	cic04141	112
LOC18048848	beta-glucosidase 11	7.53488	0.424701	1.35873e-61	5.23436e-60	NA	NA	NA	NA
LOC112096490	probable carboxylesterase 12	7.53055	0.788425	1.66865e-18	1.58579e-17	NA	NA	NA	NA
LOC18035069	serine carboxypeptidase II-3	-7.52861	2.67182	3.03219e-07	1.46934e-06	K16297	[EC:3.4.16.-]	NA	NA
LOC18041922	uncharacterized LOC18041922	7.5264	2.25318	2.48507e-08	1.30548e-07	NA	NA	NA	NA
LOC18056070	cysteine proteinase inhibitor 5	-7.52561	1.39929	1.61067e-08	8.59808e-08	NA	NA	NA	NA
LOC18039972	uncharacterized LOC18039972	-7.51741	2.7646	2.6142e-06	1.17155e-05	NA	NA	NA	NA
LOC112096704	uncharacterized LOC112096704	-7.51648	2.66934	4.49875e-07	2.15265e-06	NA	NA	NA	NA
LOC18032177	xanthohumol 4'-O-methyltransferase	7.51293	2.89429	2.6156e-05	0.000106607	NA	NA	NA	NA
LOC112096708	uncharacterized LOC112096708	-7.50961	1.28358	1.14257e-09	6.56597e-09	NA	NA	NA	NA
LOC18053153	uncharacterized LOC18053153	-7.5062	2.71411	1.05037e-06	4.89379e-06	K09955	NA	NA	NA
LOC18054463	uncharacterized LOC18054463	-7.50341	2.72977	1.4751e-06	6.77554e-06	NA	NA	NA	NA
LOC18045752	receptor-like protein Cf-9	7.50311	2.29013	8.73631e-05	0.000336683	NA	NA	NA	NA
LOC18037774	protein JINGUBANG	-7.49253	0.702065	4.219e-22	4.78038e-21	NA	NA	NA	NA
LOC18035385	protein HYPER-SENSITIVITY-RELATED 4	-7.4738	2.66871	4.41401e-07	2.11285e-06	K08900	NA	NA	NA
LOC18054495	cytochrome b-c1 complex subunit 8	7.47292	0.294772	6.5018e-121	7.68505e-119	NA	NA	NA	NA
LOC18036271	AP2-like ethylene-responsive transcription factor AIL1	-7.47224	0.646823	5.81913e-26	7.68118e-25	K09285	NA	NA	NA
LOC18049691	ornithine decarboxylase	-7.47178	2.64143	2.41537e-07	1.18061e-06	K01581	[EC:4.1.1.17]	cic00330;cic00480	029;041
LOC18055375	beta-galactosidase 7	-7.4702	2.64601	2.45882e-07	1.201e-06	NA	NA	NA	NA
LOC112098256	putative 12-oxophytodienoate reductase 11	7.46183	2.73648	2.79258e-05	0.000113465	NA	NA	NA	NA
LOC18046196	ethylene-responsive transcription factor ERF022	7.46036	1.01675	4.54862e-11	2.86482e-10	NA	NA	NA	NA
LOC18045944	disease resistance-like protein DSC1	7.44281	1.35125	9.98077e-09	5.39158e-08	NA	NA	NA	NA
LOC18033054	uncharacterized LOC18033054	7.44244	2.73786	1.04784e-05	4.42691e-05	NA	NA	NA	NA
LOC18040451	zinc-finger homeodomain protein 4	-7.42949	2.62962	1.95273e-07	9.61937e-07	NA	NA	NA	NA
LOC18051434	berberine bridge enzyme-like 18	-7.4264	2.73871	2.594e-06	1.16324e-05	NA	NA	NA	NA
LOC18034900	subtilisin-like protease SBT4.5	-7.42394	2.75048	3.32101e-06	1.47338e-05	NA	NA	NA	NA
LOC18033593	nucleobase-ascorbate transporter 4	-7.41992	0.4668	3.54882e-48	9.60028e-47	NA	NA	NA	NA
LOC18047284	disease resistance-like protein DSC1	-7.41925	0.986327	1.5089e-11	9.7848e-11	NA	NA	NA	NA
LOC18034460	protodermal factor 1	-7.41892	0.365885	1.17046e-77	6.35747e-76	NA	NA	NA	NA
LOC18055959	probable protein ABIL4	-7.41573	0.967923	7.35568e-12	4.86087e-11	NA	NA	NA	NA
LOC112097894	putative disease resistance protein RGA3	7.41388	2.54359	2.99182e-06	1.33216e-05	NA	NA	NA	NA
LOC18044008	EEF1A lysine methyltransferase 3	-7.41255	2.89773	2.61146e-05	0.000106459	K21804	[EC:2.1.1.-]	NA	NA
LOC18052413	zinc finger protein CONSTANS-LIKE 4	-7.41038	2.68841	1.03852e-06	4.84074e-06	NA	NA	NA	NA
LOC18051743	trans-resveratrol di-O-methyltransferase	7.40878	0.229497	7.02188e-195	2.21327e-192	K22588	[EC:2.1.1.4]	cic00380	033
LOC18046194	disease resistance-like protein DSC1	7.40402	2.5815	1.92793e-06	8.76736e-06	NA	NA	NA	NA
LOC18051359	cold and drought-regulated protein CORA	-7.40079	0.718657	7.07287e-21	7.48027e-20	NA	NA	NA	NA
LOC18032388	DNA repair protein XRCC4	-7.3973	2.63564	2.79308e-07	1.35663e-06	K10886	NA	cic03450	106
LOC18037492	probable disease resistance protein At5g63020	-7.39597	0.545065	2.30125e-35	4.17012e-34	NA	NA	NA	NA
LOC112100147	2-alkenal reductase (NADP(+)-dependent)-like	-7.39209	0.521148	1.44607e-38	2.92632e-37	NA	NA	NA	NA
LOC18034045	gamma-glutamyl hydrolase 1	7.38822	0.770871	1.5579e-18	1.48325e-17	NA	NA	NA	NA
LOC18035182	receptor-like protein EIX2	7.38655	1.01362	4.70294e-11	2.95754e-10	NA	NA	NA	NA
LOC18040989	non-functional pseudokinase ZED1	7.38451	2.39244	4.07532e-07	1.95659e-06	NA	NA	NA	NA
LOC18036378	boron transporter 4	-7.38031	1.00462	3.37588e-11	2.13981e-10	K24194	NA	NA	NA
LOC18045240	glutathione S-transferase U7	-7.38026	2.64437	4.18971e-07	2.0078e-06	K00799	[EC:2.5.1.18]	cic00480	041
LOC18043085	isoflavone 2'-hydroxylase	7.37979	0.883353	1.89138e-14	1.45836e-13	NA	NA	NA	NA
LOC18045823	ATPase family AAA domain-containing protein 2	-7.37512	2.70795	1.84024e-06	8.38975e-06	NA	NA	NA	NA
LOC18041996	uncharacterized LOC18041996	7.37127	4.23305	0.00262552	0.0084772	NA	NA	NA	NA
LOC112096940	receptor like protein 30-like	-7.36845	2.67758	1.07996e-06	5.02379e-06	NA	NA	NA	NA
LOC18054751	G-type lectin S-receptor-like serine/threonine-protein kinase At4g27290	7.36739	0.285016	5.75022e-125	7.03657e-123	NA	NA	NA	NA
LOC18046891	14 kDa proline-rich protein DC2.15	-7.3554	0.972633	1.42032e-11	9.2219e-11	NA	NA	NA	NA
LOC18032878	basic 7S globulin	-7.35208	2.64445	5.28917e-07	2.52017e-06	NA	NA	NA	NA
LOC18034971	probable xyloglucan endotransglucosylase/hydrolase protein B	-7.34909	0.804918	1.72623e-16	1.48761e-15	K08235	[EC:2.4.1.207]	NA	NA
LOC112097624	protein disulfide isomerase-like 5-4	7.33781	0.886892	3.16126e-14	2.40276e-13	NA	NA	NA	NA
LOC18052711	putative receptor-like protein kinase At4g00960	-7.33364	0.594919	2.68358e-29	4.02789e-28	NA	NA	NA	NA
LOC18052006	MADS-box protein defh21	-7.32284	2.75639	5.81656e-06	2.52192e-05	NA	NA	NA	NA
LOC18045324	GDSL esterase/lipase At1g29670	7.32219	1.38618	3.60051e-08	1.8688e-07	NA	NA	NA	NA
LOC18045744	beta-D-glucosyl crocetin beta-1,6-glucosyltransferase	7.32118	0.239861	2.61964e-173	6.41133e-171	NA	NA	NA	NA
LOC18044125	WEB family protein At2g40480	-7.31976	0.24822	1.26069e-162	2.79001e-160	NA	NA	NA	NA
LOC18038163	uncharacterized protein At4g19900	-7.31777	2.69786	2.06177e-06	9.34243e-06	K01988	[EC:2.4.1.228]	cic00603	055
LOC18038791	phosphate transporter PHO1 homolog 7	-7.31189	2.63272	5.7636e-07	2.73807e-06	NA	NA	NA	NA
LOC18056133	alpha-dioxygenase 2	-7.3116	0.722566	3.62288e-20	3.69626e-19	K10529	[EC:1.13.11.92]	cic00592	053
LOC112100214	uncharacterized LOC112100214	-7.31091	0.987067	3.02635e-11	1.92589e-10	NA	NA	NA	NA
LOC112099053	putative receptor-like protein kinase At3g47110	7.28773	1.02534	1.65879e-10	1.00518e-09	NA	NA	NA	NA
LOC18036490	naringenin,2-oxoglutarate 3-dioxygenase	7.28672	0.127171	0	0	K00475	[EC:1.14.11.9]	cic00941	082
LOC18034444	wound-induced protein WIN2	7.28218	1.07016	4.44015e-10	2.62038e-09	NA	NA	NA	NA
LOC18037494	uncharacterized LOC18037494	-7.28213	0.810844	5.54367e-16	4.63711e-15	NA	NA	NA	NA
LOC18037787	peroxidase 72	-7.27778	1.30651	6.76757e-09	3.70002e-08	K00430	[EC:1.11.1.7]	cic00940	081
LOC112100123	uncharacterized LOC112100123	7.27432	0.697883	1.84827e-21	2.02154e-20	NA	NA	NA	NA
LOC112095854	shikimate O-hydroxycinnamoyltransferase-like	7.27308	0.769535	4.94344e-18	4.6178e-17	NA	NA	NA	NA
LOC18052666	quinone oxidoreductase PIG3	-7.27299	0.513337	2.76045e-38	5.53766e-37	NA	NA	NA	NA
LOC18049367	amino acid permease 8	-7.2718	2.68606	1.95035e-06	8.85487e-06	K24917	NA	NA	NA
LOC18046576	malate dehydrogenase, cytoplasmic	-7.27045	2.65351	1.05158e-06	4.89833e-06	K00025	[EC:1.1.1.37]	cic00020;cic00270;cic00620;cic00630;cic00710	002;024;057;058;063
LOC18051492	double-stranded RNA-binding protein 4	-7.26717	2.72092	4.17245e-06	1.83353e-05	NA	NA	NA	NA
LOC112095829	uncharacterized LOC112095829	-7.26038	2.6497	1.06945e-06	4.97711e-06	NA	NA	NA	NA
LOC18041592	probable mediator of RNA polymerase II transcription subunit 37b	-7.25938	1.34357	1.75778e-08	9.34504e-08	K09490	[EC:3.6.4.10]	cic03060;cic04141	101;112
LOC18050084	universal stress protein PHOS34	-7.23847	2.67214	1.87752e-06	8.55037e-06	NA	NA	NA	NA
LOC18044659	beta-glucosidase 12	-7.23389	2.59146	3.42688e-07	1.65443e-06	K01188	[EC:3.2.1.21]	cic00460;cic00500;cic00999	039;042;091
LOC18055814	vacuolar protein sorting-associated protein 51 homolog	-7.23271	1.358	2.66643e-08	1.39722e-07	K20296	NA	NA	NA
LOC18034302	serine carboxypeptidase-like 17	-7.22926	0.263331	2.5408e-141	4.33248e-139	K16296	[EC:3.4.16.-]	NA	NA
LOC112099284	uncharacterized LOC112099284	-7.22864	2.61718	6.57072e-07	3.10802e-06	NA	NA	NA	NA
LOC18032251	uncharacterized membrane protein At1g16860	-7.21244	0.6016	8.13978e-28	1.15585e-26	NA	NA	NA	NA
LOC18043507	ribonuclease 3	-7.20291	2.63916	1.08339e-06	5.03748e-06	K01166	[EC:4.6.1.19]	NA	NA
LOC18033048	MADS-box protein AGL42	7.20281	1.38471	6.17756e-08	3.14749e-07	NA	NA	NA	NA
LOC18041914	COBRA-like protein 6	-7.20181	2.72564	6.16163e-06	2.66377e-05	NA	NA	NA	NA
LOC18045404	protein TAPETUM DETERMINANT 1	-7.18505	2.66568	2.02483e-06	9.17904e-06	NA	NA	NA	NA
LOC112098904	cytochrome P450 82A3-like	7.17822	2.85232	5.6446e-05	0.000221681	NA	NA	NA	NA
LOC112097687	uncharacterized LOC112097687	7.17712	2.27477	1.97532e-07	9.72607e-07	NA	NA	NA	NA
LOC112097649	uncharacterized LOC112097649	-7.1707	2.83835	3.07174e-05	0.000124201	NA	NA	NA	NA
LOC18051037	mitochondrial pyruvate carrier 4	-7.16675	0.824938	4.22645e-15	3.37256e-14	K22139	NA	NA	NA
LOC18045796	inositol 2-dehydrogenase/D-chiro-inositol 3-dehydrogenase	-7.16119	0.708512	5.47305e-20	5.54853e-19	NA	NA	NA	NA
LOC18039496	cytokinin riboside 5'-monophosphate phosphoribohydrolase LOG3	-7.15877	2.61692	7.63091e-07	3.59398e-06	K22522	[EC:3.2.2.-]	NA	NA
LOC18047729	uncharacterized LOC18047729	-7.15418	0.276084	2.34793e-125	2.90738e-123	NA	NA	NA	NA
LOC18055903	serine/threonine-protein kinase RIPK	7.15393	2.5544	9.91428e-06	4.20226e-05	NA	NA	NA	NA
LOC18033090	cyclic nucleotide-gated ion channel 1	-7.14618	2.71515	6.69664e-06	2.88606e-05	K05391	NA	cic04626	116
LOC18032032	probable sucrose-phosphate synthase 3	-7.14243	0.391685	1.24916e-62	4.95922e-61	K00696	[EC:2.4.1.14]	cic00500	042
LOC18034604	organ-specific protein S2	-7.13257	2.68072	3.97283e-06	1.74951e-05	NA	NA	NA	NA
LOC18033633	cation/H(+) antiporter 24	7.12608	0.690279	4.36561e-21	4.66929e-20	NA	NA	NA	NA
LOC112097090	small nucleolar RNA SNORD14	7.11976	2.43966	1.02015e-06	4.75725e-06	NA	NA	NA	NA
LOC18049514	uncharacterized LOC18049514	-7.11615	0.663701	1.47636e-22	1.70722e-21	NA	NA	NA	NA
LOC18031350	uncharacterized LOC18031350	-7.1119	2.72132	8.7059e-06	3.71049e-05	NA	NA	NA	NA
LOC18038637	protein PHR1-LIKE 1	-7.09473	2.6983	6.55664e-06	2.82748e-05	NA	NA	NA	NA
LOC18043822	protein TRANSPARENT TESTA 16	-7.09461	2.74461	1.29121e-05	5.39921e-05	NA	NA	NA	NA
LOC18043928	transcription factor TCP15	-7.09119	0.296565	1.42482e-106	1.28872e-104	NA	NA	NA	NA
LOC18035596	B3 domain-containing protein At4g01580	-7.09092	2.69239	5.78521e-06	2.50938e-05	NA	NA	NA	NA
LOC18033446	gibberellin-regulated protein 12	-7.08532	2.76937	1.89269e-05	7.82308e-05	NA	NA	NA	NA
LOC112098329	uncharacterized LOC112098329	7.07616	0.965509	9.34287e-11	5.76906e-10	NA	NA	NA	NA
LOC18042520	peroxidase 12	-7.07294	0.295801	6.30506e-108	5.85555e-106	K00430	[EC:1.11.1.7]	cic00940	081
LOC18047756	putative disease resistance RPP13-like protein 1	7.06831	1.40688	1.43665e-07	7.14137e-07	NA	NA	NA	NA
LOC18051247	O-fucosyltransferase 8	-7.06603	0.97812	1.0372e-10	6.37615e-10	NA	NA	NA	NA
LOC18047592	vignain	-7.06051	0.974	3.82789e-12	2.57457e-11	K16292	[EC:3.4.22.-]	NA	NA
LOC112097671	disease resistance RPP8-like protein 3	7.05774	2.58387	1.94099e-05	8.01159e-05	NA	NA	NA	NA
LOC18039951	tropinone reductase-like 1	7.03352	0.269647	2.90423e-126	3.70654e-124	NA	NA	NA	NA
LOC18031275	ABC transporter G family member 8	-7.02572	0.437231	7.67296e-49	2.10859e-47	NA	NA	NA	NA
LOC112099232	protein SRC2-like	-7.0146	2.61978	2.38012e-06	1.07265e-05	NA	NA	NA	NA
LOC18054865	cytochrome P450 711A1	-7.00656	2.6787	6.9339e-06	2.98399e-05	K20771	[EC:1.14.-.-]	NA	NA
LOC18034637	uncharacterized LOC18034637	-6.99852	0.993121	2.53479e-10	1.51789e-09	NA	NA	NA	NA
LOC112097281	uncharacterized LOC112097281	6.99306	2.40787	2.90181e-06	1.29375e-05	NA	NA	NA	NA
LOC18038859	U-box domain-containing protein 40	-6.9905	0.496034	5.33845e-38	1.05969e-36	NA	NA	NA	NA
LOC18042313	subtilisin-like protease SBT4.8	-6.98983	2.70907	1.22191e-05	5.12073e-05	NA	NA	NA	NA
LOC112099705	protein SUPPRESSOR OF npr1-1, CONSTITUTIVE 1-like	-6.98937	0.588856	4.61966e-27	6.33924e-26	NA	NA	NA	NA
LOC18050023	epidermis-specific secreted glycoprotein EP1	-6.98863	2.62026	2.4605e-06	1.10625e-05	NA	NA	NA	NA
LOC112096848	uncharacterized LOC112096848	-6.98335	1.28401	1.71439e-08	9.12835e-08	NA	NA	NA	NA
LOC18033888	auxin-responsive protein SAUR50	-6.9811	0.697335	4.97718e-20	5.06062e-19	K14488	NA	cic04075	109
LOC18040339	endochitinase EP3	6.97933	0.763731	9.31652e-17	8.11946e-16	K01183	[EC:3.2.1.14]	cic00520	045
LOC18039350	ABC transporter G family member 20	-6.97099	2.636	3.8089e-06	1.68159e-05	NA	NA	NA	NA
LOC112100727	(-)-germacrene D synthase-like	6.97001	2.34814	3.24558e-06	1.44115e-05	NA	NA	NA	NA
LOC18034383	potassium transporter 1	-6.967	2.65058	5.28544e-06	2.30027e-05	K03549	NA	NA	NA
LOC18039659	disease resistance protein At4g27190	-6.9618	0.394464	9.92014e-59	3.52165e-57	NA	NA	NA	NA
LOC18052342	rust resistance kinase Lr10	6.93511	2.75005	6.7918e-05	0.000264885	NA	NA	NA	NA
LOC112099074	phosphatidylinositol-3-phosphatase myotubularin-1-like	6.92434	2.3888	2.66724e-06	1.19429e-05	NA	NA	NA	NA
LOC18052316	uncharacterized LOC18052316	-6.9184	0.725676	5.05788e-18	4.71623e-17	NA	NA	NA	NA
LOC18032450	CASP-like protein 1D1	6.91657	1.28793	3.99334e-08	2.06599e-07	NA	NA	NA	NA
LOC18051172	uncharacterized LOC18051172	-6.90751	2.60265	2.96774e-06	1.32201e-05	NA	NA	NA	NA
LOC18038293	protein CNGC15b	-6.90687	2.62533	4.70604e-06	2.05715e-05	K05391	NA	cic04626	116
LOC18039199	putative receptor-like protein kinase At3g47110	6.90365	1.07687	4.21553e-09	2.33357e-08	NA	NA	NA	NA
LOC18047757	putative disease resistance RPP13-like protein 1	6.90117	1.32987	9.76658e-08	4.90614e-07	NA	NA	NA	NA
LOC112100777	protein SPEAR4-like	-6.89963	1.30583	4.10746e-08	2.12134e-07	NA	NA	NA	NA
LOC112100334	uncharacterized LOC112100334	6.89209	2.26618	6.77052e-07	3.19962e-06	NA	NA	NA	NA
LOC18031549	transcription factor MYB63	6.88595	1.1042	8.77735e-09	4.76501e-08	K09422	NA	NA	NA
LOC112098188	uncharacterized LOC112098188	-6.88085	2.57754	2.29509e-06	1.03613e-05	NA	NA	NA	NA
LOC18044289	protein NUCLEAR FUSION DEFECTIVE 4	-6.88027	2.65921	9.02162e-06	3.83719e-05	NA	NA	NA	NA
LOC18040793	EPIDERMAL PATTERNING FACTOR-like protein 5	-6.87933	1.30416	4.24717e-08	2.19077e-07	NA	NA	NA	NA
LOC18050577	ubiquitin-conjugating enzyme E2-23 kDa	6.8788	0.887007	1.43494e-12	9.87465e-12	K10576	[EC:2.3.2.23]	cic04120	110
LOC18036841	inorganic pyrophosphatase 1	-6.87721	0.541006	3.5298e-31	5.60965e-30	K13248	[EC:3.1.3.74]	cic00750	066
LOC112096375	protein FAR1-RELATED SEQUENCE 5-like	6.87671	2.97459	0.000275521	0.0010052	NA	NA	NA	NA
LOC18050634	microtubule-associated protein 70-5	-6.87519	2.67751	1.27732e-05	5.34436e-05	NA	NA	NA	NA
LOC18032577	protein DETOXIFICATION 12	-6.86581	2.66758	1.1898e-05	4.9902e-05	K03327	NA	NA	NA
LOC112098298	uncharacterized LOC112098298	6.86438	1.39002	2.57351e-07	1.25555e-06	NA	NA	NA	NA
LOC18033445	major allergen Pru ar 1	6.85813	3.08684	0.000423228	0.0015058	NA	NA	NA	NA
LOC18032749	probable xyloglucan galactosyltransferase GT17	-6.84503	0.59094	4.05333e-26	5.38796e-25	K20888	[EC:2.4.1.-]	NA	NA
LOC112096117	protein FAR1-RELATED SEQUENCE 5-like	-6.83516	2.66778	1.29745e-05	5.4231e-05	NA	NA	NA	NA
LOC112101212	uncharacterized LOC112101212	-6.82055	1.30239	5.37103e-08	2.74597e-07	NA	NA	NA	NA
LOC18039580	homeobox-leucine zipper protein HAT7	6.81289	0.570973	8.9136e-29	1.30492e-27	K09338	NA	NA	NA
LOC18032990	basic 7S globulin	-6.81179	0.858193	4.47378e-13	3.17205e-12	NA	NA	NA	NA
LOC18048826	uncharacterized LOC18048826	6.80986	0.706338	8.38469e-19	8.09029e-18	NA	NA	NA	NA
LOC18054345	endoglucanase 11	-6.80765	2.70252	2.29887e-05	9.41774e-05	NA	NA	NA	NA
LOC18041562	disease resistance protein At4g27190	-6.80728	0.364084	1.26377e-65	5.3984e-64	NA	NA	NA	NA
LOC112098085	DEAD-box ATP-dependent RNA helicase 5-like	6.79865	0.5148	8.11671e-34	1.4071e-32	NA	NA	NA	NA
LOC112097089	small nucleolar RNA SNORD14	6.79728	2.48748	8.85695e-06	3.76946e-05	NA	NA	NA	NA
LOC18031687	3,9-dihydroxypterocarpan 6A-monooxygenase	-6.79456	0.742313	8.61943e-17	7.53404e-16	NA	NA	NA	NA
LOC18049882	transcription factor bHLH128	-6.79079	0.518673	1.25338e-32	2.08593e-31	NA	NA	NA	NA
LOC18052687	21 kDa protein	-6.78407	0.560547	3.76999e-28	5.4125e-27	NA	NA	NA	NA
LOC18038912	interactor of constitutive active ROPs 2, chloroplastic	-6.78178	0.155208	0	0	NA	NA	NA	NA
LOC18055822	probable galactinol--sucrose galactosyltransferase 6	-6.77229	0.365978	1.18148e-64	4.9255e-63	K06617	[EC:2.4.1.82]	cic00052	006
LOC112096157	probable LRR receptor-like serine/threonine-protein kinase At3g47570	-6.77184	2.57608	3.84712e-06	1.69738e-05	NA	NA	NA	NA
LOC18044661	protein PHLOEM PROTEIN 2-LIKE A1	-6.76591	0.384461	3.73838e-58	1.30705e-56	NA	NA	NA	NA
LOC18036350	G-type lectin S-receptor-like serine/threonine-protein kinase At1g67520	-6.76396	0.497638	3.55635e-35	6.42768e-34	NA	NA	NA	NA
LOC18033092	probable F-box protein At5g04010	-6.75749	2.63357	1.09417e-05	4.61329e-05	NA	NA	NA	NA
LOC112100821	peroxidase 15-like	6.75681	0.835269	7.88007e-14	5.81928e-13	NA	NA	NA	NA
LOC18044011	cytochrome P450 82A3	6.7537	0.690636	6.50951e-19	6.31022e-18	NA	NA	NA	NA
LOC112099288	uncharacterized LOC112099288	-6.74891	2.61188	7.9633e-06	3.40865e-05	NA	NA	NA	NA
LOC18053847	disease resistance protein At4g27190	6.74698	2.58704	4.37565e-05	0.000173781	NA	NA	NA	NA
LOC112097724	uncharacterized LOC112097724	-6.74435	1.30984	9.10142e-08	4.58332e-07	NA	NA	NA	NA
LOC112097254	cationic peroxidase 1-like	-6.74222	0.75993	2.77453e-17	2.48252e-16	NA	NA	NA	NA
LOC18052146	putative UPF0481 protein At3g02645	6.74195	0.257411	4.04886e-127	5.36486e-125	NA	NA	NA	NA
LOC18040337	receptor-like protein 12	6.73653	2.98412	0.000470616	0.00166529	NA	NA	NA	NA
LOC18050132	probable glycerol-3-phosphate acyltransferase 3	-6.73576	2.6281	1.16302e-05	4.88379e-05	K13508	[EC:2.3.1.15 2.3.1.198]	cic00561;cic00564	047;049
LOC18052474	pectinesterase	6.73261	0.0937825	0	0	K01051	[EC:3.1.1.11]	cic00040	004
LOC112096594	18S ribosomal RNA	6.72958	0.589644	1.51672e-26	2.04486e-25	NA	NA	NA	NA
LOC18045648	dCTP pyrophosphatase 1	-6.72797	2.56742	3.97634e-06	1.75068e-05	K16904	[EC:3.6.1.12]	cic00240	020
LOC112099208	agamous-like MADS-box protein AGL15	6.72295	2.35736	4.59724e-06	2.01255e-05	NA	NA	NA	NA
LOC18041559	NAC transcription factor 29	6.71805	0.628568	3.45392e-22	3.93493e-21	NA	NA	NA	NA
LOC18036612	uncharacterized LOC18036612	-6.71804	2.61174	8.93762e-06	3.80224e-05	NA	NA	NA	NA
LOC18037393	laccase-11	-6.70983	2.61295	1.00586e-05	4.25562e-05	K05909	[EC:1.10.3.2]	NA	NA
LOC18049516	uncharacterized LOC18049516	-6.70529	0.429488	2.63484e-46	6.75865e-45	NA	NA	NA	NA
LOC18039648	uncharacterized LOC18039648	6.70379	2.27752	1.95017e-06	8.85487e-06	NA	NA	NA	NA
LOC18049123	disease resistance protein LAZ5	-6.70286	2.8459	0.000127396	0.000482122	NA	NA	NA	NA
LOC18046195	ethylene-responsive transcription factor ERF021	6.69835	0.607139	5.47876e-24	6.76408e-23	NA	NA	NA	NA
LOC18040857	aspartyl protease AED3	-6.69084	0.161677	0	0	NA	NA	NA	NA
LOC112101193	uncharacterized LOC112101193	-6.69077	2.50483	2.1834e-06	9.88065e-06	NA	NA	NA	NA
LOC18055480	zinc finger CCCH domain-containing protein 5	6.69067	1.43369	9.27107e-07	4.33212e-06	NA	NA	NA	NA
LOC112095422	probable pectinesterase/pectinesterase inhibitor 21	6.68669	0.328037	1.82494e-77	9.80985e-76	NA	NA	NA	NA
LOC18045901	disease resistance-like protein DSC1	6.66638	0.878158	4.33567e-12	2.90577e-11	NA	NA	NA	NA
LOC112097919	putative disease resistance RPP13-like protein 1	6.66576	1.34506	2.97355e-07	1.44193e-06	NA	NA	NA	NA
LOC112098323	uncharacterized LOC112098323	-6.65928	2.74679	6.11133e-05	0.000239469	NA	NA	NA	NA
LOC18050151	4-coumarate--CoA ligase 2	-6.65855	0.251858	5.5643e-129	7.6154e-127	K01904	[EC:6.2.1.12]	cic00130;cic00940	013;081
LOC18045819	uncharacterized LOC18045819	-6.65816	1.30514	1.19381e-07	5.95703e-07	NA	NA	NA	NA
LOC18042814	uncharacterized LOC18042814	6.65433	0.879835	5.84836e-12	3.88825e-11	NA	NA	NA	NA
LOC18048519	disease resistance-like protein DSC1	-6.65327	0.484784	9.23945e-36	1.69346e-34	NA	NA	NA	NA
LOC18038792	phosphate transporter PHO1 homolog 3	-6.65315	0.402585	2.30201e-51	6.77352e-50	NA	NA	NA	NA
LOC112097896	putative disease resistance protein RGA3	6.64715	2.3272	5.02738e-06	2.19026e-05	NA	NA	NA	NA
LOC112100401	probable RNA-dependent RNA polymerase 1	-6.64354	0.850461	1.61531e-12	1.10646e-11	NA	NA	NA	NA
LOC18049265	GDSL esterase/lipase At4g28780	-6.63577	0.183534	2.55414e-239	1.3624e-236	NA	NA	NA	NA
LOC18035114	4-coumarate--CoA ligase-like 7	6.63489	0.128286	0	0	NA	NA	NA	NA
LOC18055220	condensin complex subunit 2	-6.62776	0.421956	4.12887e-47	1.08863e-45	K06676	NA	NA	NA
LOC18042376	berberine bridge enzyme-like 18	6.62344	0.24663	1.44374e-133	2.14529e-131	NA	NA	NA	NA
LOC112097682	uncharacterized LOC112097682	-6.6217	0.486083	3.7924e-35	6.84837e-34	NA	NA	NA	NA
LOC18031235	agamous-like MADS-box protein AGL18	-6.61953	0.55815	4.54923e-27	6.25083e-26	NA	NA	NA	NA
LOC18036683	ABC transporter G family member 11	-6.61951	2.54263	4.7028e-06	2.05617e-05	NA	NA	NA	NA
LOC18037574	histidine kinase 1	-6.61354	0.341252	1.03046e-69	4.74262e-68	NA	NA	NA	NA
LOC112101460	uncharacterized LOC112101460	-6.61221	2.54421	4.96005e-06	2.16273e-05	NA	NA	NA	NA
LOC18041666	disease resistance protein At4g27190	-6.61077	1.28418	1.0133e-07	5.0831e-07	NA	NA	NA	NA
LOC18036848	dynein light chain 1, cytoplasmic	-6.60329	2.60747	1.50423e-05	6.25725e-05	K10418	NA	NA	NA
LOC112101056	probable F-box protein At1g30780	6.6006	0.455536	6.11975e-41	1.34434e-39	NA	NA	NA	NA
LOC18038278	E3 ubiquitin-protein ligase SINA-like 10	-6.59952	0.969453	1.43825e-09	8.21526e-09	K04506	[EC:2.3.2.27]	cic04120	110
LOC112098067	disease resistance protein At4g27190-like	6.59937	0.536855	1.17685e-29	1.78311e-28	NA	NA	NA	NA
LOC112098492	uncharacterized LOC112098492	-6.59829	2.5549	5.79319e-06	2.51231e-05	NA	NA	NA	NA
LOC18037583	uncharacterized LOC18037583	-6.59781	0.495354	1.08272e-33	1.87231e-32	NA	NA	NA	NA
LOC18040029	short-chain dehydrogenase TIC 32, chloroplastic	6.59728	0.905259	2.15114e-11	1.3846e-10	NA	NA	NA	NA
LOC18044232	probable L-gulonolactone oxidase 6	-6.59606	0.389051	1.277e-53	3.95318e-52	K00103	[EC:1.1.3.8]	cic00053	007
LOC18048645	silicon efflux transporter LSI2	-6.59366	0.96074	1.166e-09	6.69695e-09	NA	NA	NA	NA
LOC18055692	early nodulin-93	-6.588	0.381377	2.03321e-56	6.77834e-55	NA	NA	NA	NA
LOC112101158	probable carboxylesterase 13	6.58126	0.864287	4.54573e-12	3.04067e-11	NA	NA	NA	NA
LOC18051950	uncharacterized LOC18051950	6.57279	0.847188	2.13715e-12	1.45624e-11	NA	NA	NA	NA
LOC18049519	probable leucine-rich repeat receptor-like serine/threonine-protein kinase At3g14840	6.56904	0.92577	9.60945e-11	5.92488e-10	NA	NA	NA	NA
LOC18048671	UPF0481 protein At3g47200	-6.56501	2.5847	1.06081e-05	4.47901e-05	NA	NA	NA	NA
LOC112100041	uncharacterized LOC112100041	6.55873	2.57894	3.21438e-05	0.000129565	NA	NA	NA	NA
LOC18041543	probable LRR receptor-like serine/threonine-protein kinase At3g47570	-6.55786	2.5645	9.54737e-06	4.05087e-05	NA	NA	NA	NA
LOC18056090	WUSCHEL-related homeobox 1	-6.55759	0.997495	3.99019e-09	2.21177e-08	NA	NA	NA	NA
LOC18047337	ethylene-responsive transcription factor CRF2	-6.54841	2.65032	3.30739e-05	0.000133031	NA	NA	NA	NA
LOC18050156	anthranilate N-methyltransferase	-6.5411	2.706	6.37531e-05	0.000249296	K13066	[EC:2.1.1.68 2.1.1.4]	cic00380;cic00940	033;081
LOC112097027	disease resistance protein RPM1-like	-6.53583	2.57942	1.27291e-05	5.3291e-05	NA	NA	NA	NA
LOC18053403	rac-like GTP-binding protein RAC13	-6.53188	2.55203	8.7599e-06	3.73197e-05	K04392	NA	cic04145	114
LOC18038664	UDP-glycosyltransferase 83A1	6.53121	0.15053	0	0	NA	NA	NA	NA
LOC18047119	disease resistance-like protein DSC1	6.52971	0.28352	9.69439e-98	7.66815e-96	NA	NA	NA	NA
LOC18040648	branched-chain-amino-acid aminotransferase 2, chloroplastic	6.52099	0.986994	6.31069e-10	3.68457e-09	K00826	[EC:2.6.1.42]	cic00270;cic00280;cic00290;cic00770	024;025;026;068
LOC18043233	transcription and mRNA export factor ENY2	6.51481	0.534975	7.27536e-29	1.0681e-27	K11368	NA	NA	NA
LOC18047823	transcription factor UNE10	6.50936	0.327689	7.6693e-74	3.82601e-72	NA	NA	NA	NA
LOC18032146	repetitive proline-rich cell wall protein 1	6.50867	0.562179	1.35039e-26	1.82417e-25	NA	NA	NA	NA
LOC18054703	receptor-like protein EIX2	6.50542	0.770341	7.07482e-15	5.5728e-14	NA	NA	NA	NA
LOC18051742	cannabidiolic acid synthase-like 1	-6.50086	2.61579	2.48246e-05	0.000101379	NA	NA	NA	NA
LOC18041893	cinnamoyl-CoA reductase 2	6.49617	1.29548	2.83154e-07	1.37499e-06	NA	NA	NA	NA
LOC18038673	gibberellin-regulated protein 5	6.49527	0.225403	3.10384e-152	6.09143e-150	NA	NA	NA	NA
LOC112098448	uncharacterized LOC112098448	-6.49349	0.168181	5.99851e-272	4.45668e-269	NA	NA	NA	NA
LOC18042403	uncharacterized LOC18042403	6.49268	0.376971	2.84995e-56	9.47086e-55	NA	NA	NA	NA
LOC18039132	protein LITTLE ZIPPER 4	-6.49254	0.860385	8.48922e-12	5.59042e-11	NA	NA	NA	NA
LOC18040531	coumarin 8-geranyltransferase 1b, chloroplastic	6.49205	0.181696	4.44743e-233	2.056e-230	K09833	[EC:2.5.1.115 2.5.1.116]	cic00130	013
LOC18053173	bidirectional sugar transporter SWEET2a	-6.4897	2.53351	7.80481e-06	3.34494e-05	K15382	NA	NA	NA
LOC112101607	uncharacterized LOC112101607	6.48957	2.63573	9.85498e-05	0.000377765	NA	NA	NA	NA
LOC18038652	probable carboxylesterase 15	6.48893	1.01561	9.08351e-09	4.92351e-08	NA	NA	NA	NA
LOC18043674	transcription factor TCP12	-6.4859	2.60966	2.57e-05	0.000104831	NA	NA	NA	NA
LOC18054035	PRA1 family protein H	-6.48259	0.255576	8.17322e-118	9.19068e-116	NA	NA	NA	NA
LOC18044689	glycerophosphodiester phosphodiesterase GDPD3	-6.48012	0.608242	3.58361e-22	4.07376e-21	K18696	[EC:3.1.4.46]	cic00564	049
LOC18050657	LOB domain-containing protein 42	-6.47558	1.31268	3.13856e-07	1.51841e-06	NA	NA	NA	NA
LOC18031493	probable linoleate 9S-lipoxygenase 5	-6.47142	0.254486	1.26475e-118	1.44564e-116	K15718	[EC:1.13.11.58]	cic00591	052
LOC18038629	aspartic proteinase PCS1	-6.46738	0.513976	2.39665e-30	3.71239e-29	NA	NA	NA	NA
LOC18038397	transcription elongation factor TFIIS	-6.46652	2.62791	3.53255e-05	0.000141786	K03145	NA	NA	NA
LOC18044059	protein TORNADO 2	6.46279	1.08965	9.14057e-09	4.95056e-08	NA	NA	NA	NA
LOC112100916	zinc finger CCCH domain-containing protein 5-like	6.45159	1.09149	7.47918e-09	4.07943e-08	NA	NA	NA	NA
LOC112098312	spermidine-binding periplasmic protein SpuE-like	-6.44034	0.549139	2.85628e-26	3.82363e-25	NA	NA	NA	NA
LOC112097730	uncharacterized LOC112097730	-6.43935	0.568095	6.056e-25	7.77193e-24	NA	NA	NA	NA
LOC18034351	vinorine synthase	-6.42774	2.54247	1.25965e-05	5.27468e-05	K13065	[EC:2.3.1.133]	cic00940;cic00941;cic00945	081;082;086
LOC18052219	cationic amino acid transporter 1	-6.427	0.653013	6.46195e-19	6.26704e-18	K03294	NA	NA	NA
LOC18041974	heat stress transcription factor B-4	-6.42397	0.594374	1.70917e-22	1.96985e-21	K09419	NA	NA	NA
LOC18042793	uncharacterized LOC18042793	-6.42298	2.51369	7.90863e-06	3.38595e-05	NA	NA	NA	NA
LOC112100186	uncharacterized LOC112100186	-6.42285	0.719681	9.12422e-16	7.55017e-15	NA	NA	NA	NA
LOC18044915	snakin-2	-6.41437	2.58077	2.36304e-05	9.67305e-05	NA	NA	NA	NA
LOC18045619	thylakoid lumenal 19 kDa protein, chloroplastic	-6.41231	0.59348	1.51147e-22	1.74587e-21	NA	NA	NA	NA
LOC18054557	pentatricopeptide repeat-containing protein At4g04790, mitochondrial	-6.40763	0.595095	2.42857e-22	2.78509e-21	NA	NA	NA	NA
LOC112097303	bromodomain-containing protein 4-like	-6.40367	2.64658	5.54883e-05	0.000218208	NA	NA	NA	NA
LOC18034046	chitinase 2	-6.37925	0.567541	1.68686e-24	2.1242e-23	NA	NA	NA	NA
LOC112096212	uncharacterized LOC112096212	-6.37499	2.57684	2.65843e-05	0.000108268	NA	NA	NA	NA
LOC18046233	tyrosine-specific transport protein	-6.36705	0.848204	1.2872e-11	8.38373e-11	NA	NA	NA	NA
LOC18034910	receptor-like protein EIX2	6.36457	1.47728	4.91554e-06	2.14467e-05	NA	NA	NA	NA
LOC18050765	methanol O-anthraniloyltransferase	-6.35843	0.196379	3.08729e-190	9.30795e-188	NA	NA	NA	NA
LOC18041877	protein SRG1	6.35216	2.3093	1.13578e-05	4.78195e-05	NA	NA	NA	NA
LOC18052450	protein YLS3	-6.35027	0.332722	1.78043e-67	7.88048e-66	NA	NA	NA	NA
LOC112096716	putative disease resistance protein RGA3	-6.34655	0.601198	1.51507e-21	1.6685e-20	NA	NA	NA	NA
LOC18037735	patellin-3	-6.34466	0.136718	0	0	NA	NA	NA	NA
LOC18034161	uncharacterized LOC18034161	-6.34391	2.56683	2.62811e-05	0.000107096	NA	NA	NA	NA
LOC18032545	uncharacterized LOC18032545	6.33889	0.43571	4.91432e-40	1.04747e-38	NA	NA	NA	NA
LOC18053910	uncharacterized LOC18053910	-6.33362	0.366792	1.25301e-55	4.09205e-54	NA	NA	NA	NA
LOC112099898	protein FAR1-RELATED SEQUENCE 5-like	-6.33279	2.50328	1.05598e-05	4.46042e-05	NA	NA	NA	NA
LOC18052432	protein trichome birefringence-like 43	-6.32479	0.63708	4.1596e-19	4.06636e-18	NA	NA	NA	NA
LOC18048526	TMV resistance protein N	6.32468	1.33278	8.61855e-07	4.03537e-06	NA	NA	NA	NA
LOC112095424	BAHD acyltransferase BIA1-like	-6.3215	2.60675	4.87516e-05	0.000192627	NA	NA	NA	NA
LOC18033796	protein DMR6-LIKE OXYGENASE 2	6.28947	0.19804	2.30007e-183	6.21407e-181	NA	NA	NA	NA
LOC18037005	probable inactive nicotinamidase At3g16190	6.28944	3.01145	0.00098901	0.00336733	NA	NA	NA	NA
LOC18053063	disease resistance protein RPP13	-6.28796	0.466153	2.2494e-34	3.9791e-33	NA	NA	NA	NA
LOC18037144	growth-regulating factor 1	-6.28575	0.678023	4.81509e-17	4.25163e-16	NA	NA	NA	NA
LOC18048423	protein LIGHT-DEPENDENT SHORT HYPOCOTYLS 1	-6.284	0.673199	3.18979e-17	2.83821e-16	NA	NA	NA	NA
LOC18050605	LOB domain-containing protein 6	-6.2828	2.53651	2.25202e-05	9.23493e-05	NA	NA	NA	NA
LOC112100345	BTB/POZ and TAZ domain-containing protein 3-like	6.27726	0.415088	4.56107e-43	1.06972e-41	NA	NA	NA	NA
LOC18040500	FT-interacting protein 1	-6.27681	0.46301	1.25621e-34	2.24125e-33	NA	NA	NA	NA
LOC112100231	probable glutathione S-transferase	6.27384	0.467613	3.99483e-34	6.97184e-33	NA	NA	NA	NA
LOC18046115	LEAF RUST 10 DISEASE-RESISTANCE LOCUS RECEPTOR-LIKE PROTEIN KINASE-like 2.1	6.271	0.79298	6.75177e-13	4.73238e-12	NA	NA	NA	NA
LOC18049056	putative methyltransferase DDB_G0268948	-6.26615	2.67255	0.000113095	0.000431215	NA	NA	NA	NA
LOC18041134	3-oxo-Delta(4,5)-steroid 5-beta-reductase	6.26496	0.225999	3.404e-140	5.75719e-138	K22419	[EC:1.3.1.3]	NA	NA
LOC18044559	uncharacterized LOC18044559	6.26239	1.04928	6.05957e-08	3.08888e-07	NA	NA	NA	NA
LOC18031318	uncharacterized LOC18031318	-6.26157	1.29726	5.97302e-07	2.83368e-06	NA	NA	NA	NA
LOC18032436	arogenate dehydratase/prephenate dehydratase 1, chloroplastic	-6.25233	0.732436	1.31633e-14	1.02599e-13	K05359	[EC:4.2.1.91 4.2.1.51]	cic00400	034
LOC112098538	methionine S-methyltransferase-like	6.25158	2.35167	2.85271e-05	0.00011566	NA	NA	NA	NA
LOC18049030	uncharacterized LOC18049030	-6.24768	0.364195	1.69329e-54	5.37793e-53	NA	NA	NA	NA
LOC18040227	receptor like protein 42	6.24705	1.02681	1.17903e-08	6.34932e-08	NA	NA	NA	NA
LOC112097271	uncharacterized LOC112097271	-6.24596	2.6338	8.47156e-05	0.000327086	NA	NA	NA	NA
LOC18035320	protein NRT1/ PTR FAMILY 1.2	-6.24503	0.643305	9.99113e-19	9.60025e-18	K14638	NA	NA	NA
LOC18038072	protein LURP-one-related 17	-6.24363	2.54124	2.89622e-05	0.000117332	NA	NA	NA	NA
LOC18046478	protein P21	-6.2412	2.67886	0.000124934	0.000473491	NA	NA	NA	NA
LOC18036640	uncharacterized LOC18036640	-6.23984	2.51844	1.99535e-05	8.22453e-05	NA	NA	NA	NA
LOC18048774	transcription factor bHLH162	-6.2383	1.29164	5.97047e-07	2.83311e-06	NA	NA	NA	NA
LOC112098845	uncharacterized LOC112098845	-6.23702	2.54019	2.91443e-05	0.000118024	NA	NA	NA	NA
LOC18039542	laccase-17	-6.2274	2.58139	4.92575e-05	0.000194552	K05909	[EC:1.10.3.2]	NA	NA
LOC18043672	aspartyl protease family protein 2	-6.22543	0.320307	2.21215e-69	1.01364e-67	K22683	[EC:3.4.23.-]	NA	NA
LOC18037227	AP2-like ethylene-responsive transcription factor AIL6	-6.21791	0.37184	8.13457e-52	2.41748e-50	K09285	NA	NA	NA
LOC18039536	E3 ubiquitin-protein ligase RNF14	-6.21068	2.54703	3.5487e-05	0.000142379	NA	NA	NA	NA
LOC18044100	protein SRG1	-6.20228	0.394085	4.9172e-46	1.25205e-44	NA	NA	NA	NA
LOC18042753	UPF0481 protein At3g47200	-6.19809	1.36028	1.84559e-06	8.41232e-06	NA	NA	NA	NA
LOC112097913	disease resistance protein RGA2-like	6.1948	2.82536	0.000672218	0.00234045	NA	NA	NA	NA
LOC18041660	kunitz trypsin inhibitor 2	-6.19372	0.373761	5.2753e-51	1.53916e-49	NA	NA	NA	NA
LOC18048151	licodione synthase	-6.18824	0.341378	7.53743e-61	2.84575e-59	K23179	[EC:1.14.19.76]	cic00941;cic00943	082;084
LOC18040092	mitoferrin	6.186	0.594576	2.99946e-21	3.23304e-20	K15113	NA	NA	NA
LOC18054881	ABC transporter C family member 3	6.18394	1.14976	5.19243e-07	2.47578e-06	K05666	NA	cic02010	092
LOC18051704	receptor kinase-like protein Xa21	6.18369	2.45261	8.16529e-05	0.000315612	K13420	[EC:2.7.11.1]	cic04016;cic04626	107;116
LOC18034357	serine carboxypeptidase-like 17	-6.17891	0.259236	7.43542e-104	6.39169e-102	K16296	[EC:3.4.16.-]	NA	NA
LOC18043264	V-type proton ATPase subunit H	-6.17817	0.659791	3.02361e-17	2.69958e-16	NA	NA	NA	NA
LOC18039167	probable inactive receptor kinase At5g58300	-6.17298	0.278765	1.75059e-89	1.15979e-87	NA	NA	NA	NA
LOC18042601	superoxide dismutase [Cu-Zn] 4A	-6.17295	2.6545	0.000127186	0.000481415	K04565	[EC:1.15.1.1]	cic04146	115
LOC18051857	subtilisin-like protease SBT3.18	-6.1607	2.65043	0.000129571	0.000489996	NA	NA	NA	NA
LOC18041250	uncharacterized LOC18041250	-6.15957	2.53255	3.68313e-05	0.000147488	NA	NA	NA	NA
LOC112098381	uncharacterized LOC112098381	-6.15809	2.57387	6.27662e-05	0.000245668	NA	NA	NA	NA
LOC18054146	xyloglucan endotransglucosylase/hydrolase protein 22	-6.15657	2.60846	8.88219e-05	0.000341925	NA	NA	NA	NA
LOC18054621	glutamate receptor 2.8	-6.15523	0.502935	1.41116e-28	2.05865e-27	K05387	NA	NA	NA
LOC18051086	palmitoyl-acyl carrier protein thioesterase, chloroplastic	6.15438	0.324903	1.69005e-66	7.40172e-65	NA	NA	NA	NA
LOC18046615	legumin A	-6.15081	2.61973	0.000100676	0.000385702	NA	NA	NA	NA
LOC18050432	uncharacterized LOC18050432	6.1476	0.858138	9.50795e-11	5.86577e-10	NA	NA	NA	NA
LOC18039329	uncharacterized LOC18039329	-6.14628	2.49276	2.19856e-05	9.0228e-05	NA	NA	NA	NA
LOC18040881	7-deoxyloganetin glucosyltransferase	6.14295	2.43699	9.43648e-05	0.000362659	NA	NA	NA	NA
LOC18048655	ethylene-responsive transcription factor ERF039	6.13971	0.834041	1.0261e-11	6.72948e-11	NA	NA	NA	NA
LOC112098484	chaperonin CPN60-1, mitochondrial-like	6.13814	0.597616	7.44147e-21	7.85812e-20	NA	NA	NA	NA
LOC18053263	uncharacterized LOC18053263	-6.13641	0.254245	4.31944e-107	3.94111e-105	K08912	NA	cic00196	016
LOC112096854	uncharacterized LOC112096854	-6.12951	2.52583	3.82007e-05	0.000152766	NA	NA	NA	NA
LOC18033692	probable indole-3-acetic acid-amido synthetase GH3.1	-6.12868	2.59768	8.7406e-05	0.000336786	K14487	NA	cic04075	109
LOC112100718	uncharacterized LOC112100718	6.12846	1.0209	8.08333e-08	4.08745e-07	NA	NA	NA	NA
LOC18053428	probable aminotransferase TAT2	-6.12432	0.39878	5.74218e-44	1.3762e-42	K00815	[EC:2.6.1.5]	cic00130;cic00270;cic00350;cic00360;cic00400;cic00950;cic00960	013;024;031;032;034;087;088
LOC112098844	uncharacterized LOC112098844	-6.11727	2.4987	2.80117e-05	0.000113792	NA	NA	NA	NA
LOC18054047	6-hydroxynicotinate 3-monooxygenase	6.11278	0.368134	5.34813e-52	1.59623e-50	NA	NA	NA	NA
LOC112099817	putative F-box protein At3g16210	6.11016	2.52332	0.000127037	0.000480937	NA	NA	NA	NA
LOC112096098	disease resistance protein SUMM2-like	-6.09758	0.167715	2.07575e-237	1.05322e-234	NA	NA	NA	NA
LOC112097072	small nucleolar RNA snoR99	6.09622	2.48899	0.000105741	0.00040451	NA	NA	NA	NA
LOC112096755	E3 ubiquitin-protein ligase MBR2-like	-6.09617	2.75968	0.000343719	0.00123902	NA	NA	NA	NA
LOC112097811	putative disease resistance protein RGA3	-6.09153	1.29699	1.15458e-06	5.36013e-06	NA	NA	NA	NA
LOC112097709	uncharacterized LOC112097709	-6.08847	0.432916	3.58344e-37	6.90883e-36	NA	NA	NA	NA
LOC112101157	arabinogalactan protein 1-like	-6.08232	1.29595	1.21746e-06	5.64325e-06	NA	NA	NA	NA
LOC18049411	germin-like protein subfamily 1 member 17	6.08228	0.323687	2.04108e-65	8.70096e-64	NA	NA	NA	NA
LOC18031889	receptor kinase-like protein Xa21	-6.08077	2.74987	0.000327686	0.00118369	NA	NA	NA	NA
LOC18038761	uncharacterized LOC18038761	6.0763	0.950675	3.34363e-09	1.86281e-08	NA	NA	NA	NA
LOC18047309	probable pectinesterase 68	-6.07371	0.26478	7.19559e-96	5.36523e-94	NA	NA	NA	NA
LOC18045460	probable calcium-binding protein CML16	6.07361	0.75103	9.67914e-14	7.12005e-13	K13448	NA	cic04626	116
LOC18047966	putative anthocyanidin reductase	6.07226	0.271664	8.34895e-92	5.77021e-90	NA	NA	NA	NA
LOC18053652	vacuolar-processing enzyme	-6.07056	0.75659	4.94026e-14	3.71019e-13	K01369	[EC:3.4.22.34]	NA	NA
LOC112096809	uncharacterized LOC112096809	-6.0667	2.80727	0.000463029	0.00164011	NA	NA	NA	NA
LOC18053225	sodium-dependent phosphate transporter 1	-6.06571	2.4954	3.33454e-05	0.000134071	K14640	NA	NA	NA
LOC112098299	uncharacterized LOC112098299	6.06493	0.883865	4.73961e-10	2.7892e-09	NA	NA	NA	NA
LOC18041136	carboxyvinyl-carboxyphosphonate phosphorylmutase, chloroplastic	6.05509	1.1704	2.16731e-07	1.06211e-06	NA	NA	NA	NA
LOC18036735	probable disease resistance protein At5g63020	-6.05468	2.50107	3.74393e-05	0.000149894	NA	NA	NA	NA
LOC18037095	serine/threonine-protein kinase SAPK2	6.0536	0.713639	3.80829e-15	3.04707e-14	K14498	[EC:2.7.11.1]	cic04016;cic04075	107;109
LOC18052881	uncharacterized LOC18052881	-6.0514	0.658099	1.19839e-16	1.04006e-15	K09955	NA	NA	NA
LOC18033035	defensin Ec-AMP-D1	6.04979	0.430789	6.9308e-38	1.36795e-36	NA	NA	NA	NA
LOC18032541	transcription factor MYB13	6.04424	2.78344	0.000676852	0.002355	K09422	NA	NA	NA
LOC112101526	uncharacterized LOC112101526	-6.03274	2.68832	0.000246241	0.000903129	NA	NA	NA	NA
LOC18050126	transcription factor UPBEAT1	-6.03085	1.38081	4.74408e-06	2.07334e-05	NA	NA	NA	NA
LOC112099291	uncharacterized LOC112099291	-6.0264	0.995087	6.44796e-08	3.28043e-07	NA	NA	NA	NA
LOC18031424	uncharacterized LOC18031424	-6.01098	0.692005	3.92902e-15	3.13884e-14	NA	NA	NA	NA
LOC18042767	cytochrome P450 CYP82D47	6.01056	0.301368	1.38255e-73	6.84788e-72	NA	NA	NA	NA
LOC18043735	potassium transporter 5	6.0095	0.712121	5.18144e-14	3.88431e-13	K03549	NA	NA	NA
LOC112098529	uncharacterized LOC112098529	-6.00847	0.318411	3.38705e-65	1.43505e-63	NA	NA	NA	NA
LOC18039560	alpha carbonic anhydrase 1, chloroplastic	-6.00812	2.5751	0.000105554	0.000403871	K01674	[EC:4.2.1.1]	cic00910	079
LOC18049129	uncharacterized LOC18049129	-6.00629	0.387343	1.65807e-44	4.05799e-43	K11322	NA	NA	NA
LOC18033555	ABC transporter B family member 11	-6.00229	0.441602	8.21552e-35	1.47057e-33	K05658	[EC:7.6.2.2]	cic02010	092
LOC18035586	B3 domain-containing transcription factor VRN1	-5.99171	0.655098	2.01148e-16	1.72841e-15	NA	NA	NA	NA
LOC18044914	UDP-glycosyltransferase 74B1	-5.98973	0.312181	3.72273e-67	1.64076e-65	K11820	[EC:2.4.1.195]	cic00380	033
LOC112097396	36.4 kDa proline-rich protein-like	5.9883	0.523517	5.22734e-26	6.91319e-25	NA	NA	NA	NA
LOC18047714	cytochrome P450 71A1	-5.98817	0.382245	2.86076e-45	7.17016e-44	K20617	NA	NA	NA
LOC18040656	pathogen-related protein	5.98809	0.233302	4.58767e-119	5.27278e-117	NA	NA	NA	NA
LOC18050355	uncharacterized LOC18050355	-5.98688	2.72957	0.00036429	0.00130909	NA	NA	NA	NA
LOC18038440	probable leucine-rich repeat receptor-like protein kinase At1g35710	-5.98681	0.490374	1.40535e-28	2.05161e-27	NA	NA	NA	NA
LOC18052503	peroxidase A2	5.98584	0.698227	5.51503e-15	4.37564e-14	NA	NA	NA	NA
LOC18032307	translation initiation factor eIF-2B subunit beta	-5.98525	1.27455	1.30462e-06	6.02709e-06	K03754	NA	NA	NA
LOC112098377	disease resistance RPP8-like protein 3	-5.98183	0.166408	1.74408e-231	7.55876e-229	NA	NA	NA	NA
LOC18041264	UPF0481 protein At3g47200	-5.98089	2.66991	0.000254237	0.000931141	NA	NA	NA	NA
LOC18031567	glutaredoxin	-5.97337	0.596238	7.63087e-20	7.67255e-19	K03676	NA	NA	NA
LOC18045422	floricaula/leafy homolog	-5.97296	2.61891	0.000180709	0.000674674	NA	NA	NA	NA
LOC18045066	14-3-3-like protein GF14 iota	-5.96939	2.65595	0.000238037	0.000875356	NA	NA	NA	NA
LOC18055199	oligopeptide transporter 1	-5.96911	0.836363	1.47946e-10	8.98866e-10	NA	NA	NA	NA
LOC112101151	uncharacterized LOC112101151	5.96842	0.87919	2.69586e-10	1.61109e-09	NA	NA	NA	NA
LOC112098533	uncharacterized LOC112098533	-5.96789	1.03093	1.80003e-07	8.87979e-07	NA	NA	NA	NA
LOC18045262	probable carboxylesterase 6	-5.96568	1.28865	1.73956e-06	7.94819e-06	NA	NA	NA	NA
LOC18056039	defensin-like protein 182	-5.96285	2.6554	0.000239901	0.000881119	NA	NA	NA	NA
LOC18031299	protein MIZU-KUSSEI 1	-5.96242	2.57111	0.00011904	0.000452806	NA	NA	NA	NA
LOC18032657	probable glutathione S-transferase	-5.96033	2.67382	0.000273865	0.000999687	K00799	[EC:2.5.1.18]	cic00480	041
LOC18033713	17.4 kDa class I heat shock protein	5.95975	1.20679	3.57096e-06	1.58023e-05	K13993	NA	cic04141	112
LOC112100185	receptor-like protein EIX2	-5.95704	2.55084	9.83016e-05	0.000377022	NA	NA	NA	NA
LOC18040582	serine carboxypeptidase II-3	5.95443	0.427548	3.32643e-37	6.42523e-36	K16297	[EC:3.4.16.-]	NA	NA
LOC18032576	protein TPX2	-5.95392	2.52656	7.76099e-05	0.000300879	NA	NA	NA	NA
LOC112097655	DNA (cytosine-5)-methyltransferase 1-like	5.95276	0.873022	2.67887e-10	1.60139e-09	NA	NA	NA	NA
LOC112099734	peptide chain release factor 1-like	5.946	3.08954	0.00209012	0.00682908	NA	NA	NA	NA
LOC18031806	probable glutathione S-transferase	5.94076	0.5905	7.38322e-20	7.43793e-19	K00799	[EC:2.5.1.18]	cic00480	041
LOC112097088	small nucleolar RNA SNORD14	5.91567	2.41704	9.78125e-05	0.000375216	NA	NA	NA	NA
LOC18037209	uncharacterized LOC18037209	-5.9149	1.262	1.44187e-06	6.63026e-06	NA	NA	NA	NA
LOC112101137	uncharacterized LOC112101137	5.91394	0.875114	8.74594e-10	5.0652e-09	NA	NA	NA	NA
LOC18040170	gibberellin-regulated protein 1	5.90148	0.0746652	0	0	NA	NA	NA	NA
LOC18046039	LRR receptor-like serine/threonine-protein kinase FLS2	-5.89949	2.5556	0.000124903	0.000473463	K13420	[EC:2.7.11.1]	cic04016;cic04626	107;116
LOC18031183	uncharacterized LOC18031183	-5.89934	1.30744	2.84831e-06	1.27153e-05	NA	NA	NA	NA
LOC18046161	uncharacterized LOC18046161	-5.89406	0.374219	2.90591e-46	7.44479e-45	NA	NA	NA	NA
LOC18034296	4-hydroxy-3-methylbut-2-enyl diphosphate reductase, chloroplastic	-5.89323	1.51348	2.83824e-05	0.00011514	K03527	[EC:1.17.7.4]	cic00900	072
LOC18045834	uncharacterized LOC18045834	-5.88548	0.528191	1.15217e-23	1.40249e-22	NA	NA	NA	NA
LOC112098550	disease resistance protein RGA2-like	5.88531	0.483766	1.62374e-28	2.36545e-27	NA	NA	NA	NA
LOC18035077	photosystem I subunit O	-5.88307	0.666978	2.17023e-15	1.76013e-14	K14332	NA	cic00195	015
LOC18041709	hippocampus abundant transcript-like protein 1	-5.88193	0.569996	8.77384e-21	9.22761e-20	NA	NA	NA	NA
LOC112097678	probable terpene synthase 9	-5.87721	2.70705	0.000421408	0.00150061	NA	NA	NA	NA
LOC18033764	deSI-like protein At4g17486	-5.87713	0.270526	2.19972e-85	1.36193e-83	NA	NA	NA	NA
LOC18044593	V-type proton ATPase subunit H	-5.87628	0.820084	1.56422e-10	9.48979e-10	NA	NA	NA	NA
LOC18046706	protein ACCELERATED CELL DEATH 6	5.87525	0.629584	8.93846e-18	8.2132e-17	NA	NA	NA	NA
LOC18043565	peroxidase 65	-5.87027	0.575118	3.03496e-20	3.11016e-19	K00430	[EC:1.11.1.7]	cic00940	081
LOC18054632	uncharacterized LOC18054632	-5.86841	0.649269	4.55145e-16	3.82252e-15	NA	NA	NA	NA
LOC18033243	disease resistance protein RPP5	-5.86255	0.30721	3.21961e-66	1.4012e-64	NA	NA	NA	NA
LOC18034667	BURP domain-containing protein BNM2A	-5.86036	2.42171	3.04751e-05	0.000123293	NA	NA	NA	NA
LOC112099895	uncharacterized LOC112099895	-5.85957	3.00966	0.00147931	0.00493728	NA	NA	NA	NA
LOC18038800	putative UPF0481 protein At3g02645	-5.8591	1.03087	2.99402e-07	1.45118e-06	NA	NA	NA	NA
LOC18044239	expansin-A23	-5.85535	2.72131	0.000484341	0.00171036	NA	NA	NA	NA
LOC18047355	probable methyltransferase PMT18	-5.85156	2.46921	4.64101e-05	0.000183584	NA	NA	NA	NA
LOC18055184	glucan endo-1,3-beta-glucosidase 7	-5.84399	0.968207	2.42557e-08	1.27615e-07	NA	NA	NA	NA
LOC18042771	abscisic stress-ripening protein 1	-5.84028	2.48286	7.14288e-05	0.000277952	NA	NA	NA	NA
LOC112098407	putative disease resistance RPP13-like protein 1	-5.83849	0.323253	1.43836e-59	5.18581e-58	NA	NA	NA	NA
LOC18050718	uncharacterized LOC18050718	-5.83737	2.6686	0.000373587	0.00133926	NA	NA	NA	NA
LOC112100365	uncharacterized LOC112100365	5.8366	2.1581	1.80138e-05	7.45903e-05	NA	NA	NA	NA
LOC18049389	putative F-box protein At5g55150	5.83524	3.36746	0.00417609	0.013145	NA	NA	NA	NA
LOC18039282	uncharacterized LOC18039282	-5.83311	1.30871	3.74237e-06	1.65362e-05	NA	NA	NA	NA
LOC112096710	probable LRR receptor-like serine/threonine-protein kinase At5g45780	-5.8329	0.752021	2.48903e-12	1.69048e-11	NA	NA	NA	NA
LOC112101209	uncharacterized LOC112101209	-5.82884	0.551082	2.43072e-21	2.63228e-20	NA	NA	NA	NA
LOC18054254	NADP-dependent glyceraldehyde-3-phosphate dehydrogenase	-5.82026	0.19711	3.23819e-156	6.60433e-154	K00131	[EC:1.2.1.9]	cic00010;cic00030	001;003
LOC18054041	6-hydroxynicotinate 3-monooxygenase	5.8169	0.345808	6.98815e-53	2.10688e-51	NA	NA	NA	NA
LOC18052996	protein NUCLEAR FUSION DEFECTIVE 4	-5.81527	0.371379	4.49453e-45	1.1211e-43	NA	NA	NA	NA
LOC112097394	uncharacterized LOC112097394	5.81409	0.708613	7.41917e-14	5.49256e-13	NA	NA	NA	NA
LOC18037884	uncharacterized LOC18037884	-5.81368	0.655052	1.64536e-15	1.34387e-14	NA	NA	NA	NA
LOC18042609	protein ACCELERATED CELL DEATH 6	5.81366	0.994529	2.03018e-07	9.97726e-07	NA	NA	NA	NA
LOC18054292	aspartic proteinase nepenthesin-1	-5.81338	2.54757	0.000156839	0.000588091	NA	NA	NA	NA
LOC112099258	zinc finger protein WIP2-like	-5.81112	2.51277	0.00011177	0.000426322	NA	NA	NA	NA
LOC18036386	putative cyclic nucleotide-gated ion channel 7	-5.81021	0.621244	3.83584e-17	3.39562e-16	K05391	NA	cic04626	116
LOC18052075	UDP-glycosyltransferase 92A1	5.80746	2.94269	0.00174192	0.00575103	NA	NA	NA	NA
LOC112098308	elongation of fatty acids protein 3-like	-5.80738	0.401737	8.36241e-39	1.70385e-37	NA	NA	NA	NA
LOC112099200	uncharacterized LOC112099200	-5.7977	2.62973	0.000312957	0.00113363	NA	NA	NA	NA
LOC18031486	inhibitor of trypsin and hageman factor	-5.79516	0.80784	4.56199e-11	2.87237e-10	NA	NA	NA	NA
LOC18050308	expansin-like B1	-5.79385	1.36135	8.56055e-06	3.65003e-05	NA	NA	NA	NA
LOC18036417	cytochrome P450 71A1	-5.79256	2.53928	0.000154907	0.000581473	K20623	NA	cic00905	075
LOC18055489	probable calcium-binding protein CML21	5.78156	0.361694	3.42536e-47	9.05435e-46	K13448	NA	cic04626	116
LOC18041719	BEL1-like homeodomain protein 11	-5.78088	1.01703	3.38542e-07	1.63555e-06	NA	NA	NA	NA
LOC18055735	rho guanine nucleotide exchange factor 8	-5.78019	0.977776	1.53888e-07	7.6222e-07	NA	NA	NA	NA
LOC18038508	uncharacterized LOC18038508	5.77893	1.48162	3.11889e-05	0.000126058	NA	NA	NA	NA
LOC18033425	major allergen Pru ar 1	5.77746	0.263269	1.12105e-87	7.1979e-86	NA	NA	NA	NA
LOC18049801	protein DETOXIFICATION 16	-5.77284	0.832763	5.6165e-10	3.28849e-09	K03327	NA	NA	NA
LOC18034475	receptor-like protein EIX2	5.77001	0.542506	2.26817e-22	2.60401e-21	NA	NA	NA	NA
LOC18054819	thiol protease aleurain	-5.76948	0.145148	9.49629e-281	7.90205e-278	K01366	[EC:3.4.22.16]	NA	NA
LOC18048227	uncharacterized LOC18048227	-5.76932	2.42807	5.06158e-05	0.000199689	NA	NA	NA	NA
LOC18052515	disease resistance protein At4g27190	5.76767	0.570877	1.16062e-19	1.15801e-18	NA	NA	NA	NA
LOC112095850	uncharacterized LOC112095850	-5.76718	2.50332	0.000120963	0.000459221	NA	NA	NA	NA
LOC18043697	ethylene-responsive transcription factor ESR2	-5.76586	2.56062	0.00020488	0.000759465	NA	NA	NA	NA
LOC112098292	uncharacterized LOC112098292	-5.76308	2.69248	0.000500072	0.00176352	NA	NA	NA	NA
LOC18052333	cinnamoyl-CoA reductase 1	5.75682	0.139208	2.52864e-303	2.50492e-300	NA	NA	NA	NA
LOC18042936	floral homeotic protein DEFICIENS	-5.74882	0.290557	6.6571e-71	3.14745e-69	K09264	NA	NA	NA
LOC18036080	ACT domain-containing protein ACR1	-5.73806	2.58335	0.000264592	0.000967364	NA	NA	NA	NA
LOC18044387	non-functional NADPH-dependent codeinone reductase 2	-5.73588	0.316901	1.50808e-59	5.42777e-58	K22374	[EC:1.1.1.285]	cic00999	091
LOC18036268	methylesterase 10	5.73448	0.786696	1.47788e-11	9.58961e-11	NA	NA	NA	NA
LOC18042788	pectinesterase 2	5.7343	2.6327	0.00071889	0.00249293	K01051	[EC:3.1.1.11]	cic00040	004
LOC18045829	FT-interacting protein 1	-5.7343	0.411035	3.69032e-36	6.8667e-35	NA	NA	NA	NA
LOC18055851	aldehyde dehydrogenase family 2 member C4	-5.73145	1.29071	4.3636e-06	1.91389e-05	NA	NA	NA	NA
LOC18033982	pathogenesis-related protein 1	-5.72979	1.36963	1.16093e-05	4.87697e-05	K13449	NA	cic04016;cic04075;cic04626	107;109;116
LOC112096122	myosin-4-like	5.72858	2.37343	0.000205025	0.000759868	NA	NA	NA	NA
LOC18032006	hexose carrier protein HEX6	5.72398	1.47608	3.86764e-05	0.00015452	NA	NA	NA	NA
LOC18036744	ammonium transporter 3 member 2	-5.72299	1.34555	9.12217e-06	3.87837e-05	K03320	NA	NA	NA
LOC18037818	SPX domain-containing protein 2	5.72139	1.53041	5.35442e-05	0.000210922	NA	NA	NA	NA
LOC18032052	pentatricopeptide repeat-containing protein At1g62680, mitochondrial	-5.70464	2.5653	0.000272227	0.000994057	NA	NA	NA	NA
LOC18034755	mitochondrial phosphate carrier protein 1, mitochondrial	-5.70228	2.48604	0.000130221	0.000492274	K15102	NA	NA	NA
LOC18046029	uncharacterized LOC18046029	-5.70193	0.172033	2.28974e-195	7.44273e-193	NA	NA	NA	NA
LOC18040570	uncharacterized LOC18040570	5.69731	0.545974	5.88744e-21	6.2488e-20	NA	NA	NA	NA
LOC18051854	probable O-methyltransferase 3	-5.69486	0.957598	1.56749e-07	7.75655e-07	NA	NA	NA	NA
LOC18050504	receptor-like protein 9DC3	-5.69174	0.232001	1.77662e-107	1.64262e-105	NA	NA	NA	NA
LOC18032415	arogenate dehydratase/prephenate dehydratase 2, chloroplastic	-5.68903	0.290457	2.6555e-69	1.21412e-67	NA	NA	NA	NA
LOC18040604	UDP-glucuronate:xylan alpha-glucuronosyltransferase 2	-5.6878	2.52889	0.000202539	0.000751457	K20890	[EC:2.4.1.-]	NA	NA
LOC18049716	vinorine synthase	5.68758	1.17142	4.83311e-06	2.11003e-05	K13065	[EC:2.3.1.133]	cic00940;cic00941;cic00945	081;082;086
LOC18043439	transcription factor PIF4	-5.68294	0.484326	5.8596e-26	7.7297e-25	K16189	NA	cic04075	109
LOC18040420	protein RALF-like 33	-5.68288	0.43339	2.7885e-32	4.58571e-31	NA	NA	NA	NA
LOC18049087	TMV resistance protein N	-5.68224	0.680364	5.44753e-14	4.07644e-13	NA	NA	NA	NA
LOC18032881	trans-resveratrol di-O-methyltransferase	-5.67852	1.34581	1.06021e-05	4.47736e-05	NA	NA	NA	NA
LOC18044578	uncharacterized LOC18044578	-5.67744	1.03243	7.17842e-07	3.39007e-06	NA	NA	NA	NA
LOC112095702	protein FAR1-RELATED SEQUENCE 5-like	-5.67548	2.40762	5.87503e-05	0.000230514	NA	NA	NA	NA
LOC18039258	putative UPF0481 protein At3g02645	-5.67457	2.75334	0.0008239	0.0028358	NA	NA	NA	NA
LOC18047086	ethylene-responsive transcription factor CRF5	-5.67455	0.997987	3.97689e-07	1.91153e-06	NA	NA	NA	NA
LOC18039531	pentatricopeptide repeat-containing protein At3g53360, mitochondrial	5.67122	2.44584	0.000317521	0.00114936	NA	NA	NA	NA
LOC18034198	josephin-like protein	-5.67117	1.34858	1.0665e-05	4.50211e-05	NA	NA	NA	NA
LOC18054358	indole-3-acetate O-methyltransferase 1	-5.66336	2.52619	0.000213354	0.000789332	K18848	[EC:2.1.1.278]	NA	NA
LOC18046366	cytochrome P450 83B1	5.65311	0.758544	9.56011e-12	6.28369e-11	NA	NA	NA	NA
LOC18053730	uncharacterized LOC18053730	-5.64383	1.29304	6.42091e-06	2.77125e-05	NA	NA	NA	NA
LOC18050767	methanol O-anthraniloyltransferase	-5.63562	1.27603	5.24735e-06	2.28417e-05	NA	NA	NA	NA
LOC112100757	receptor-like protein EIX1	5.6348	0.737064	1.79283e-12	1.22443e-11	NA	NA	NA	NA
LOC18037906	vinorine synthase	5.63303	0.267016	7.53123e-81	4.30418e-79	NA	NA	NA	NA
LOC18049115	transcription factor MYB11	-5.63302	0.220671	7.98573e-117	8.83655e-115	K09422	NA	NA	NA
LOC112099985	uncharacterized LOC112099985	-5.63199	2.49923	0.000184692	0.000688682	NA	NA	NA	NA
LOC18048115	protein PHYTOCHROME KINASE SUBSTRATE 3	5.62899	0.743848	1.26236e-11	8.22452e-11	NA	NA	NA	NA
LOC112095783	shikimate O-hydroxycinnamoyltransferase-like	-5.62664	2.47893	0.000149639	0.000562781	NA	NA	NA	NA
LOC18034930	laccase-17	-5.62475	2.54551	0.000277044	0.00101023	K05909	[EC:1.10.3.2]	NA	NA
LOC18040316	receptor like protein 3	-5.61904	2.68808	0.000691264	0.00240233	NA	NA	NA	NA
LOC112095589	uncharacterized LOC112095589	-5.6165	2.49719	0.00019194	0.000714553	NA	NA	NA	NA
LOC18049969	nudix hydrolase 8	-5.61325	0.499934	6.60433e-24	8.11997e-23	NA	NA	NA	NA
LOC18036154	protein BIG GRAIN 1-like B	-5.60986	0.480034	8.91076e-26	1.17101e-24	NA	NA	NA	NA
LOC18049486	ankyrin repeat-containing protein BDA1	-5.59982	1.47362	4.19058e-05	0.000166813	NA	NA	NA	NA
LOC18054807	scarecrow-like protein 18	-5.58585	2.56061	0.000347602	0.00125258	NA	NA	NA	NA
LOC18034265	WUSCHEL-related homeobox 3	-5.5853	2.68149	0.000716799	0.00248692	NA	NA	NA	NA
LOC18041279	uncharacterized LOC18041279	-5.58432	0.177993	2.60523e-174	6.52971e-172	NA	NA	NA	NA
LOC18038937	UPF0098 protein CPn_0877/CP_0992/CPj0877/CpB0906	-5.57844	2.54279	0.000314526	0.00113892	NA	NA	NA	NA
LOC112095429	uncharacterized LOC112095429	-5.57803	0.552856	1.01023e-19	1.01087e-18	NA	NA	NA	NA
LOC18034365	laccase-17	-5.57761	2.57998	0.000410563	0.00146349	K05909	[EC:1.10.3.2]	NA	NA
LOC18032922	flavonoid 3'-monooxygenase	-5.57664	0.355748	1.12544e-44	2.76418e-43	NA	NA	NA	NA
LOC18034751	probable leucine-rich repeat receptor-like protein kinase At1g35710	-5.56113	3.05366	0.00243708	0.00789101	NA	NA	NA	NA
LOC18039484	pleiotropic drug resistance protein 3	-5.55695	0.384249	2.3648e-38	4.75773e-37	NA	NA	NA	NA
LOC18047772	uncharacterized LOC18047772	-5.55606	0.745759	2.11946e-11	1.36463e-10	NA	NA	NA	NA
LOC18038311	uncharacterized LOC18038311	-5.55539	2.44132	0.000135477	0.000511584	NA	NA	NA	NA
LOC112099875	probable RNA-dependent RNA polymerase 1	-5.55352	2.58914	0.000458566	0.00162513	NA	NA	NA	NA
LOC18049947	receptor-like protein 9DC3	-5.55349	0.426165	1.32189e-31	2.12842e-30	NA	NA	NA	NA
LOC18046827	disease resistance RPP13-like protein 4	5.54948	1.04965	6.56055e-07	3.10391e-06	NA	NA	NA	NA
LOC18049376	protein ELC-like	-5.54856	1.32092	1.21307e-05	5.08475e-05	K12183	NA	cic04144	113
LOC112098452	putative disease resistance protein RGA4	-5.54845	0.42194	1.61206e-32	2.67429e-31	NA	NA	NA	NA
LOC18038211	vinorine synthase	5.54662	2.41441	0.000292311	0.00106347	K13065	[EC:2.3.1.133]	cic00940;cic00941;cic00945	081;082;086
LOC112096619	H/ACA ribonucleoprotein complex subunit 1-like	-5.54521	0.448005	6.97498e-29	1.02544e-27	NA	NA	NA	NA
LOC18041430	agamous-like MADS-box protein AGL80	5.54504	0.924768	4.03645e-08	2.08674e-07	NA	NA	NA	NA
LOC18055788	protein SPEAR3	5.54459	0.369527	1.38144e-41	3.11356e-40	NA	NA	NA	NA
LOC18035781	BTB/POZ domain-containing protein At3g49900	-5.54441	0.322219	6.39689e-54	1.99512e-52	NA	NA	NA	NA
LOC112099555	uncharacterized mitochondrial protein AtMg00810-like	-5.54317	3.00018	0.00224171	0.00729458	NA	NA	NA	NA
LOC18048499	disease resistance-like protein DSC1	5.5428	2.13599	4.5411e-05	0.000179906	NA	NA	NA	NA
LOC18033321	nucleolar GTP-binding protein 1	5.54052	0.618408	3.82262e-16	3.22473e-15	NA	NA	NA	NA
LOC18050499	receptor-like protein 9DC3	-5.54033	0.234295	6.46369e-100	5.33588e-98	NA	NA	NA	NA
LOC18046384	disease resistance response protein 206	5.53743	0.451451	4.91181e-29	7.25713e-28	NA	NA	NA	NA
LOC18050875	phosphoenolpyruvate/phosphate translocator 2, chloroplastic	5.53125	1.30535	1.1409e-05	4.79864e-05	NA	NA	NA	NA
LOC112097318	putative disease resistance RPP13-like protein 1	5.53016	1.03517	5.35156e-07	2.54873e-06	NA	NA	NA	NA
LOC18054777	lysM domain receptor-like kinase 3	5.52853	3.06203	0.00318586	0.0101728	NA	NA	NA	NA
LOC18042214	uncharacterized LOC18042214	-5.52587	0.149787	3.39264e-240	1.85729e-237	NA	NA	NA	NA
LOC112096730	autophagy-related protein 101-like	5.5246	0.60702	1.78835e-16	1.53859e-15	NA	NA	NA	NA
LOC112099725	uncharacterized LOC112099725	-5.52236	2.75694	0.00114723	0.00388505	NA	NA	NA	NA
LOC18035536	uncharacterized LOC18035536	5.51925	0.408459	3.59271e-34	6.28589e-33	NA	NA	NA	NA
LOC18044407	protein NRT1/ PTR FAMILY 3.1	-5.5081	0.455956	2.67955e-27	3.73361e-26	K14638	NA	NA	NA
LOC18054925	receptor-like protein EIX2	-5.50553	2.48871	0.000256729	0.000939772	NA	NA	NA	NA
LOC112098949	uncharacterized LOC112098949	-5.5047	2.59969	0.000562541	0.00197544	NA	NA	NA	NA
LOC18050978	serine/threonine-protein kinase STY13	-5.5043	0.312234	4.13499e-56	1.36975e-54	NA	NA	NA	NA
LOC112095846	uncharacterized LOC112095846	-5.49905	1.34782	1.90609e-05	7.87224e-05	NA	NA	NA	NA
LOC18049496	probable leucine-rich repeat receptor-like serine/threonine-protein kinase At3g14840	-5.49873	0.558344	1.29222e-18	1.23312e-17	NA	NA	NA	NA
LOC18046704	protein ACCELERATED CELL DEATH 6	-5.498	2.4023	0.000116178	0.000442405	NA	NA	NA	NA
LOC18051014	cellulose synthase-like protein B4	-5.49766	0.339458	1.05628e-48	2.89129e-47	NA	NA	NA	NA
LOC18050468	probable F-box protein At4g22030	-5.49636	2.47759	0.000242643	0.000890717	NA	NA	NA	NA
LOC18041804	ethylene-responsive transcription factor ERF014	5.493	0.189346	2.06744e-149	3.87468e-147	NA	NA	NA	NA
LOC18044873	thioredoxin H-type	5.49188	1.12713	6.42787e-06	2.77368e-05	K03671	NA	NA	NA
LOC18055776	UDP-glycosyltransferase 91C1	5.4795	0.213696	8.61271e-117	9.4799e-115	NA	NA	NA	NA
LOC18033231	7-ethoxycoumarin O-deethylase	5.47695	0.25731	9.99649e-82	5.79267e-80	NA	NA	NA	NA
LOC18031830	polygalacturonase At1g48100	-5.46614	0.175784	2.85225e-171	6.6669e-169	NA	NA	NA	NA
LOC18040130	transcription factor MYB1R1	-5.46326	0.259744	5.46472e-79	3.03964e-77	NA	NA	NA	NA
LOC112096229	uncharacterized LOC112096229	-5.46283	0.806447	6.81032e-10	3.96849e-09	NA	NA	NA	NA
LOC18053781	calcium uptake protein, mitochondrial	-5.4627	0.766969	7.90246e-11	4.9e-10	K22827	NA	NA	NA
LOC18038426	caffeoyl-CoA O-methyltransferase	5.45971	0.267072	1.46747e-75	7.67028e-74	K00588	[EC:2.1.1.104]	cic00940;cic00941;cic00945	081;082;086
LOC112100143	uncharacterized LOC112100143	-5.45803	0.981257	8.17326e-07	3.83898e-06	NA	NA	NA	NA
LOC18041814	nitrate reductase [NAD(P)H]	-5.45368	0.255795	1.22947e-81	7.10461e-80	K10534	[EC:1.7.1.1 1.7.1.2 1.7.1.3]	cic00910	079
LOC18048269	VAN3-binding protein	-5.45253	0.246378	6.27328e-88	4.05289e-86	NA	NA	NA	NA
LOC18043360	protein DETOXIFICATION 24	-5.44975	0.595203	3.27956e-16	2.77788e-15	K03327	NA	NA	NA
LOC18033777	cell division protein FtsZ homolog 2-1, chloroplastic	-5.44932	0.477529	1.84197e-24	2.31531e-23	K03531	NA	NA	NA
LOC18050572	WAT1-related protein At5g40240	-5.44677	0.388195	2.99927e-36	5.60592e-35	NA	NA	NA	NA
LOC18044878	protein LOL1	-5.4449	0.261172	1.04045e-77	5.66612e-76	NA	NA	NA	NA
LOC18050953	uncharacterized LOC18050953	-5.43699	2.55018	0.000496191	0.00175043	NA	NA	NA	NA
LOC18041383	caffeic acid 3-O-methyltransferase	-5.43178	0.261593	3.14307e-78	1.7252e-76	K13066	[EC:2.1.1.68 2.1.1.4]	cic00380;cic00940	033;081
LOC18055322	putative hydrolase YtaP	-5.42902	0.302465	3.70309e-58	1.29689e-56	NA	NA	NA	NA
LOC18034965	anti-sigma-I factor RsgI6	-5.42765	2.52563	0.000423227	0.0015058	NA	NA	NA	NA
LOC18052665	beta-galactosidase 8	-5.41899	2.66183	0.000921236	0.00314894	NA	NA	NA	NA
LOC18033714	hemoglobin-2	-5.41654	0.149089	1.68975e-232	7.6417e-230	NA	NA	NA	NA
LOC18037020	probable mannitol dehydrogenase	5.41596	2.40068	0.00036158	0.00130002	NA	NA	NA	NA
LOC112100720	uncharacterized LOC112100720	-5.41142	0.996965	1.32918e-06	6.13646e-06	NA	NA	NA	NA
LOC18032281	putative calcium-transporting ATPase 13, plasma membrane-type	-5.40956	1.06662	3.8437e-06	1.69623e-05	NA	NA	NA	NA
LOC18043865	protein trichome birefringence-like 38	-5.40856	0.909589	4.64483e-08	2.39233e-07	NA	NA	NA	NA
LOC18053518	uncharacterized LOC18053518	-5.4034	0.642855	7.33472e-14	5.43585e-13	NA	NA	NA	NA
LOC18041273	catalase	5.40236	0.121056	0	0	K03781	[EC:1.11.1.6]	cic00380;cic00630;cic04016;cic04146	033;058;107;115
LOC18047571	calcineurin B-like protein 7	-5.39822	0.549078	1.16229e-18	1.11169e-17	K06268	NA	NA	NA
LOC112096177	disease resistance protein SUMM2-like	-5.39624	0.561114	8.5833e-18	7.90081e-17	NA	NA	NA	NA
LOC18054151	probable xyloglucan endotransglucosylase/hydrolase protein 23	5.3955	0.270351	9.37722e-72	4.51561e-70	K14504	[EC:2.4.1.207]	cic04075	109
LOC18040909	uncharacterized LOC18040909	-5.39372	0.222856	6.61374e-104	5.70895e-102	NA	NA	NA	NA
LOC112101098	wall-associated receptor kinase-like 8	5.39339	1.70009	0.000349623	0.00125877	NA	NA	NA	NA
LOC18037797	RING-H2 finger protein ATL78	-5.39175	2.49808	0.000392052	0.00140063	K19040	[EC:2.3.2.27]	NA	NA
LOC18034333	transcription factor FER-LIKE IRON DEFICIENCY-INDUCED TRANSCRIPTION FACTOR	-5.38718	0.62382	2.92106e-15	2.34893e-14	NA	NA	NA	NA
LOC18044702	zinc finger protein ZAT1	5.38604	0.434313	3.12935e-29	4.68008e-28	NA	NA	NA	NA
LOC112098405	elongation of fatty acids protein A-like	-5.38578	1.28315	1.46684e-05	6.10661e-05	NA	NA	NA	NA
LOC18036062	citrate-binding protein	-5.38471	1.00304	1.57071e-06	7.20359e-06	NA	NA	NA	NA
LOC112096198	gamma-terpinene synthase, chloroplastic-like	-5.3835	1.01425	1.77646e-06	8.10431e-06	NA	NA	NA	NA
LOC18051814	probable inactive leucine-rich repeat receptor-like protein kinase At3g03770	-5.38247	0.475774	1.77084e-24	2.22726e-23	NA	NA	NA	NA
LOC18039780	protein SCARECROW	-5.38173	0.215936	7.54607e-110	7.30144e-108	NA	NA	NA	NA
LOC18032882	protein GAMETE EXPRESSED 2	5.37922	2.5472	0.000949564	0.00323939	NA	NA	NA	NA
LOC18053322	serine carboxypeptidase-like 31	-5.37702	0.466728	5.93703e-25	7.62395e-24	K16297	[EC:3.4.16.-]	NA	NA
LOC18047393	cytochrome P450 71A1	-5.37615	1.33183	2.46052e-05	0.000100523	NA	NA	NA	NA
LOC18055944	E3 ubiquitin-protein ligase ATL42	5.37203	0.940783	9.23028e-08	4.64596e-07	K10664	[EC:2.3.2.27]	NA	NA
LOC18037851	uncharacterized LOC18037851	-5.36835	0.389231	5.12835e-35	9.23681e-34	NA	NA	NA	NA
LOC18034497	L-type lectin-domain containing receptor kinase IV.1	-5.36369	0.814632	2.1249e-09	1.20022e-08	NA	NA	NA	NA
LOC18038263	non-specific lipid-transfer protein	5.35862	0.181624	7.3377e-154	1.45377e-151	NA	NA	NA	NA
LOC18044444	E3 ubiquitin-protein ligase BOI	-5.35796	0.261916	1.49216e-74	7.60819e-73	K19042	[EC:2.3.2.27]	NA	NA
LOC112098100	uncharacterized LOC112098100	-5.35572	0.430004	1.71904e-28	2.50253e-27	NA	NA	NA	NA
LOC112100406	uncharacterized LOC112100406	-5.35473	2.57721	0.00070687	0.00245452	NA	NA	NA	NA
LOC18052938	MDIS1-interacting receptor like kinase 2	-5.35403	1.03738	2.98762e-06	1.33058e-05	NA	NA	NA	NA
LOC18033215	carboxylesterase 1	-5.35197	0.246849	9.39856e-84	5.60224e-82	NA	NA	NA	NA
LOC112096802	uncharacterized LOC112096802	-5.34819	0.366681	4.49596e-39	9.26034e-38	NA	NA	NA	NA
LOC18054680	probable polygalacturonase At3g15720	-5.34699	2.71613	0.00136649	0.00458281	K01184	[EC:3.2.1.15]	cic00040	004
LOC18047934	importin subunit alpha-4	-5.34628	0.996632	1.61408e-06	7.3911e-06	NA	NA	NA	NA
LOC18052873	DNA damage-repair/toleration protein DRT100	-5.34506	1.30292	2.03549e-05	8.38002e-05	NA	NA	NA	NA
LOC18041300	probable cytochrome c biosynthesis protein	-5.34487	2.72462	0.00141105	0.00472613	NA	NA	NA	NA
LOC112095677	alpha-copaene synthase-like	-5.34038	0.707633	5.40156e-12	3.59695e-11	NA	NA	NA	NA
LOC18041509	receptor protein kinase CLAVATA1	-5.32847	0.6251	2.01274e-14	1.54963e-13	K00924	[EC:2.7.1.-]	NA	NA
LOC18034509	laccase-4	-5.32727	2.616	0.000955209	0.00325758	K05909	[EC:1.10.3.2]	NA	NA
LOC18045123	leucine-rich repeat receptor protein kinase EMS1	-5.32274	0.669353	1.22805e-12	8.48739e-12	NA	NA	NA	NA
LOC112100713	leucoanthocyanidin reductase-like	-5.31517	0.305364	2.12304e-54	6.7121e-53	NA	NA	NA	NA
LOC18041172	sugar transporter ERD6-like 10	-5.30796	0.270254	6.05445e-69	2.74402e-67	NA	NA	NA	NA
LOC18039847	nodulation-signaling pathway 2 protein	5.30529	0.844864	2.07974e-09	1.17567e-08	NA	NA	NA	NA
LOC18049062	LOB domain-containing protein 18	-5.30521	2.7176	0.00146441	0.00489226	K21994	NA	NA	NA
LOC112098957	uncharacterized LOC112098957	5.3047	0.733437	3.77421e-11	2.38723e-10	NA	NA	NA	NA
LOC18040955	probable cellulose synthase A catalytic subunit 3 [UDP-forming]	-5.3036	2.53726	0.000636074	0.00222241	NA	NA	NA	NA
LOC18032540	transcription repressor OFP12	-5.30359	0.217707	7.52957e-105	6.63719e-103	NA	NA	NA	NA
LOC18043313	protein NRT1/ PTR FAMILY 7.3	-5.30086	0.293075	1.41033e-58	4.98116e-57	K14638	NA	NA	NA
LOC18035645	abscisic acid 8'-hydroxylase 2	-5.29835	1.35346	4.03102e-05	0.000160738	K09843	[EC:1.14.14.137]	cic00906	076
LOC112095824	uncharacterized LOC112095824	-5.29787	0.359886	2.86893e-39	5.95039e-38	NA	NA	NA	NA
LOC112097931	putative disease resistance protein RGA3	-5.28775	1.5145	0.000144441	0.000543945	NA	NA	NA	NA
LOC112099303	uncharacterized LOC112099303	5.28667	0.774158	2.42684e-10	1.45408e-09	NA	NA	NA	NA
LOC18052443	EP1-like glycoprotein 2	-5.28593	1.22706	1.08953e-05	4.59561e-05	NA	NA	NA	NA
LOC18035116	ankyrin repeat-containing protein At5g02620	-5.27968	2.45594	0.000397324	0.00141849	NA	NA	NA	NA
LOC18055424	transcription factor MYB120	-5.27931	1.04224	4.63528e-06	2.02792e-05	NA	NA	NA	NA
LOC18049012	laccase-6	-5.27443	2.48218	0.000489947	0.00172957	K05909	[EC:1.10.3.2]	NA	NA
LOC112099695	disease resistance-like protein DSC1	-5.27284	0.566816	6.15699e-17	5.41352e-16	NA	NA	NA	NA
LOC112096011	28S ribosomal RNA	5.27232	0.901563	1.79567e-08	9.54158e-08	NA	NA	NA	NA
LOC112098539	uncharacterized LOC112098539	5.27138	0.895152	8.57139e-08	4.32478e-07	NA	NA	NA	NA
LOC18034989	vestitone reductase	-5.26799	2.52816	0.000667484	0.0023263	NA	NA	NA	NA
LOC18034510	CDPK-related kinase 5	-5.26698	0.211577	5.42141e-109	5.17347e-107	NA	NA	NA	NA
LOC18053049	linoleate 13S-lipoxygenase 2-1, chloroplastic	-5.26655	1.27227	1.99341e-05	8.21817e-05	K00454	[EC:1.13.11.12]	cic00591;cic00592	052;053
LOC18039716	wall-associated receptor kinase-like 1	5.26621	2.26119	0.000277155	0.00101046	NA	NA	NA	NA
LOC18034762	ABC transporter G family member 11	5.26164	2.88228	0.00302005	0.00967149	NA	NA	NA	NA
LOC18032959	sucrose synthase 2	-5.26072	0.188473	1.49471e-136	2.35565e-134	K00695	[EC:2.4.1.13]	cic00500	042
LOC18048167	classical arabinogalactan protein 26	-5.25957	0.412488	5.45467e-30	8.34364e-29	NA	NA	NA	NA
LOC112100286	uncharacterized LOC112100286	5.25584	1.09986	1.85645e-06	8.45995e-06	NA	NA	NA	NA
LOC112100719	uncharacterized LOC112100719	5.2539	1.05938	6.12166e-06	2.64759e-05	NA	NA	NA	NA
LOC18040111	peroxidase 21	-5.25226	0.757655	4.59451e-10	2.70764e-09	K00430	[EC:1.11.1.7]	cic00940	081
LOC18053615	3-oxo-Delta(4,5)-steroid 5-beta-reductase	5.25217	0.513579	6.5036e-20	6.57407e-19	K22419	[EC:1.3.1.3]	NA	NA
LOC18046946	probable LRR receptor-like serine/threonine-protein kinase At1g53420	-5.25122	0.75715	2.51135e-10	1.50428e-09	NA	NA	NA	NA
LOC18050261	pectinesterase	-5.24857	0.134314	4.22938e-265	2.93279e-262	NA	NA	NA	NA
LOC18036870	caffeoyl-CoA O-methyltransferase	5.24785	0.280685	4.62143e-63	1.85957e-61	K00588	[EC:2.1.1.104]	cic00940;cic00941;cic00945	081;082;086
LOC18043441	protein DETOXIFICATION 43	-5.24782	2.47166	0.000483431	0.00170773	NA	NA	NA	NA
LOC18032429	CASP-like protein 1D1	-5.2467	1.4107	7.72825e-05	0.000299666	NA	NA	NA	NA
LOC18054168	pathogenesis-related protein PR-1	-5.24519	0.166842	1.7724e-172	4.23807e-170	NA	NA	NA	NA
LOC18038091	uncharacterized LOC18038091	5.24487	3.65388	0.00906039	0.0271512	NA	NA	NA	NA
LOC18040378	uncharacterized LOC18040378	5.24307	0.195646	1.59513e-126	2.06109e-124	NA	NA	NA	NA
LOC18052501	peroxidase 15	5.23803	1.28707	6.3127e-05	0.000247034	K00430	[EC:1.11.1.7]	cic00940	081
LOC18047711	cytochrome P450 71A1	-5.23441	2.65628	0.00135001	0.00452971	K20617	NA	NA	NA
LOC18047838	protein DETOXIFICATION 27	-5.23331	0.963428	1.73544e-06	7.93286e-06	K03327	NA	NA	NA
LOC18043136	probable RNA helicase SDE3	-5.23079	0.347772	2.46502e-41	5.50213e-40	K18422	[EC:3.6.4.13]	NA	NA
LOC18036440	transcription factor HHO5	5.22635	0.202492	7.82702e-117	8.70724e-115	NA	NA	NA	NA
LOC18047874	uncharacterized LOC18047874	-5.20983	0.329675	7.17319e-45	1.77015e-43	NA	NA	NA	NA
LOC18043897	CLAVATA3/ESR (CLE)-related protein 9	-5.20542	0.7562	7.09605e-10	4.12805e-09	NA	NA	NA	NA
LOC18047164	GATA transcription factor 4	5.20305	0.201307	3.83607e-117	4.29042e-115	NA	NA	NA	NA
LOC18042446	glutelin type-D 1	5.20226	1.16775	2.50881e-05	0.000102415	NA	NA	NA	NA
LOC18044391	beta-D-glucosyl crocetin beta-1,6-glucosyltransferase	5.19697	0.320252	4.86552e-48	1.31281e-46	NA	NA	NA	NA
LOC18050179	adenine/guanine permease AZG2	-5.1957	2.78695	0.00219934	0.00716454	K06901	NA	NA	NA
LOC112101220	uncharacterized LOC112101220	5.19332	2.10009	0.000115628	0.000440469	NA	NA	NA	NA
LOC18042325	probable acyl-activating enzyme 9	5.19296	0.490558	1.29993e-21	1.4369e-20	NA	NA	NA	NA
LOC18038642	auxin-responsive protein SAUR32	-5.19286	0.74766	5.44143e-10	3.19047e-09	NA	NA	NA	NA
LOC18035870	monooxygenase 2	5.19215	0.36971	2.69342e-36	5.03878e-35	NA	NA	NA	NA
LOC18048525	TMV resistance protein N	-5.18984	0.227695	1.48417e-91	1.01899e-89	NA	NA	NA	NA
LOC112098918	protein FAR1-RELATED SEQUENCE 5-like	-5.18589	1.56369	0.000213608	0.000790128	NA	NA	NA	NA
LOC18049016	protein KINESIN LIGHT CHAIN-RELATED 1	-5.18578	0.245546	7.66404e-79	4.2516e-77	NA	NA	NA	NA
LOC18033697	B3 domain-containing protein Os01g0234100	-5.18231	0.564817	3.32961e-16	2.81797e-15	NA	NA	NA	NA
LOC112098092	zinc finger BED domain-containing protein RICESLEEPER 1-like	5.17679	0.699774	7.10903e-12	4.70236e-11	NA	NA	NA	NA
LOC18040686	receptor like protein 30	5.17654	1.15432	2.36806e-05	9.69168e-05	NA	NA	NA	NA
LOC18032733	uncharacterized LOC18032733	-5.17649	0.366684	1.94724e-36	3.66261e-35	NA	NA	NA	NA
LOC18033003	serine/threonine-protein kinase BRI1-like 2	-5.17479	0.293587	1.86378e-55	6.03927e-54	NA	NA	NA	NA
LOC18048989	molybdenum cofactor sulfurase	5.17316	1.74373	0.000645912	0.00225452	NA	NA	NA	NA
LOC18047480	protein SRG1	5.16648	0.201796	2.13035e-115	2.29625e-113	NA	NA	NA	NA
LOC18048734	3-oxo-Delta(4,5)-steroid 5-beta-reductase	-5.1637	2.40668	0.000390883	0.00139741	NA	NA	NA	NA
LOC18035415	auxin-responsive protein SAUR21	5.15462	1.2785	8.86167e-05	0.000341198	K14488	NA	cic04075	109
LOC18044025	leucoanthocyanidin reductase	-5.14994	0.217198	5.92001e-99	4.79199e-97	K13081	[EC:1.17.1.3]	cic00941	082
LOC18055340	protein JINGUBANG	-5.14983	0.838387	4.38931e-08	2.26297e-07	NA	NA	NA	NA
LOC18049217	probable LRR receptor-like serine/threonine-protein kinase At3g47570	-5.1481	0.672075	4.73874e-12	3.16774e-11	NA	NA	NA	NA
LOC18033838	squalene monooxygenase	-5.14551	0.755762	5.57865e-10	3.26725e-09	K00511	[EC:1.14.14.17]	cic00100;cic00909	012;078
LOC112099851	protein SRG1-like	5.14454	0.396532	3.73423e-31	5.92548e-30	NA	NA	NA	NA
LOC18040018	glutathione S-transferase L3	-5.14265	0.661525	4.70964e-12	3.14929e-11	K00799	[EC:2.5.1.18]	cic00480	041
LOC112098229	uncharacterized LOC112098229	-5.14096	0.544692	3.09159e-17	2.7579e-16	NA	NA	NA	NA
LOC18042783	glutathione S-transferase L3	5.13756	2.85787	0.00344903	0.0109844	NA	NA	NA	NA
LOC18038799	UPF0481 protein At3g47200	-5.13439	0.496349	2.5261e-20	2.60151e-19	NA	NA	NA	NA
LOC18041314	probable 3-beta-hydroxysteroid-Delta(8),Delta(7)-isomerase	-5.13416	0.466627	1.3341e-22	1.54787e-21	K01824	[EC:5.3.3.5]	cic00100	012
LOC112099242	uncharacterized LOC112099242	-5.13351	2.61969	0.0014249	0.00476792	NA	NA	NA	NA
LOC18050873	zingipain-1	-5.13019	0.98183	3.71627e-06	1.64244e-05	NA	NA	NA	NA
LOC18042560	transcription factor bHLH96	-5.12601	0.427569	5.49843e-27	7.52525e-26	NA	NA	NA	NA
LOC18054752	G-type lectin S-receptor-like serine/threonine-protein kinase At4g27290	5.11951	0.407373	3.99573e-29	5.93737e-28	NA	NA	NA	NA
LOC18032647	transcription factor bHLH92	-5.11922	0.899894	2.11646e-07	1.03866e-06	NA	NA	NA	NA
LOC18054473	probable sucrose-phosphate synthase 1	5.1173	0.273509	1.64048e-62	6.50035e-61	K00696	[EC:2.4.1.14]	cic00500	042
LOC18032628	TIMELESS-interacting protein	-5.11042	0.381979	1.17015e-32	1.9521e-31	K10904	NA	NA	NA
LOC18037724	fasciclin-like arabinogalactan protein 21	-5.10624	2.50965	0.000892388	0.00305385	NA	NA	NA	NA
LOC18051576	protein DETOXIFICATION 41	-5.10503	0.746161	3.56619e-10	2.11662e-09	K03327	NA	NA	NA
LOC112099150	uncharacterized LOC112099150	-5.10487	0.68654	3.27012e-11	2.0753e-10	NA	NA	NA	NA
LOC18037556	G-type lectin S-receptor-like serine/threonine-protein kinase LECRK4	-5.10485	2.45947	0.000670287	0.0023345	NA	NA	NA	NA
LOC18032200	uncharacterized LOC18032200	-5.10327	2.86299	0.00304989	0.00975807	NA	NA	NA	NA
LOC18038024	scopoletin glucosyltransferase	-5.08904	2.61076	0.00148346	0.00495035	K13496	[EC:2.4.1.-]	cic00908	077
LOC18041742	bZIP transcription factor 27	-5.08689	1.28767	4.18234e-05	0.000166549	NA	NA	NA	NA
LOC18051435	uncharacterized LOC18051435	-5.081	0.401712	2.36711e-29	3.56059e-28	NA	NA	NA	NA
LOC18056154	inositol oxygenase 2	-5.07844	0.993594	5.53314e-06	2.40556e-05	K00469	[EC:1.13.99.1]	cic00053;cic00562	007;048
LOC112096764	uncharacterized LOC112096764	-5.07398	2.5991	0.00146483	0.00489287	NA	NA	NA	NA
LOC18036789	phospho-2-dehydro-3-deoxyheptonate aldolase 2, chloroplastic	-5.07079	0.125051	1.85465e-283	1.6076e-280	K01626	[EC:2.5.1.54]	cic00400	034
LOC18049872	cytochrome P450 CYP72A219	5.07059	2.49187	0.00141757	0.00474722	NA	NA	NA	NA
LOC18032212	xanthohumol 4'-O-methyltransferase	-5.07019	0.467137	5.84187e-23	6.88546e-22	K22588	[EC:2.1.1.4]	cic00380	033
LOC18055299	photosynthetic NDH subunit of subcomplex B 3, chloroplastic	-5.06708	1.02461	8.27458e-06	3.5368e-05	NA	NA	NA	NA
LOC18054538	uncharacterized LOC18054538	5.06498	0.485452	2.75906e-20	2.83441e-19	NA	NA	NA	NA
LOC112099562	uncharacterized LOC112099562	-5.06478	2.52837	0.00107386	0.00364727	NA	NA	NA	NA
LOC18043965	DNA ligase 1	5.06097	0.168538	1.29965e-156	2.70367e-154	NA	NA	NA	NA
LOC18043359	axial regulator YABBY 4	-5.05821	0.484155	1.40709e-20	1.46652e-19	NA	NA	NA	NA
LOC18046562	glycine-rich protein 23	-5.05599	0.105742	0	0	NA	NA	NA	NA
LOC18045153	golgin subfamily B member 1	-5.05314	2.54329	0.00118739	0.00400928	NA	NA	NA	NA
LOC18049039	monothiol glutaredoxin-S1	5.05204	3.0598	0.00535672	0.0166025	K03676	NA	NA	NA
LOC112098119	LRR receptor-like serine/threonine-protein kinase GSO2	5.04533	1.70768	0.000639809	0.00223434	NA	NA	NA	NA
LOC18053232	uncharacterized LOC18053232	-5.04495	2.63597	0.00178458	0.00588625	NA	NA	NA	NA
LOC18045779	uncharacterized LOC18045779	5.04241	0.354447	4.31267e-37	8.28407e-36	NA	NA	NA	NA
LOC18043637	monocopper oxidase-like protein SKU5	-5.03605	2.56262	0.00136913	0.00459091	K19791	NA	NA	NA
LOC18031544	AP2-like ethylene-responsive transcription factor PLT1	-5.0337	2.64877	0.00188298	0.00619411	K09285	NA	NA	NA
LOC18043151	cysteine protease XCP2	-5.03174	0.902992	4.25711e-07	2.03963e-06	K16290	[EC:3.4.22.-]	NA	NA
LOC18037129	indole-3-pyruvate monooxygenase YUCCA2	-5.03063	0.259408	2.01354e-66	8.79991e-65	K11816	[EC:1.14.13.168]	cic00380	033
LOC112100175	subtilisin-like protease SBT1.1	-5.02198	0.755274	2.52511e-09	1.41781e-08	NA	NA	NA	NA
LOC18048453	transcription factor MYB4	5.01981	1.47131	0.000208024	0.000770571	K09422	NA	NA	NA
LOC18050235	respiratory burst oxidase homolog protein A	-5.01944	0.134187	1.20322e-240	6.76504e-238	K13447	[EC:1.6.3.- 1.11.1.-]	cic04016;cic04626	107;116
LOC18054797	crooked neck-like protein 1	5.01855	0.722204	3.80626e-10	2.25589e-09	K12869	NA	NA	NA
LOC18038894	AP2-like ethylene-responsive transcription factor At1g16060	5.01599	1.73609	0.000849341	0.00291709	NA	NA	NA	NA
LOC18054089	protein DETOXIFICATION 19	-5.01552	0.119738	6.91216e-301	6.53607e-298	K03327	NA	NA	NA
LOC18038735	PH, RCC1 and FYVE domains-containing protein 1	-5.00885	0.27847	2.63893e-57	9.01438e-56	NA	NA	NA	NA
LOC18054532	indole-3-pyruvate monooxygenase YUCCA6	-5.00681	0.450056	5.69741e-23	6.71901e-22	K11816	[EC:1.14.13.168]	cic00380	033
LOC18039298	uncharacterized LOC18039298	-5.0031	0.160586	2.74466e-168	6.27442e-166	NA	NA	NA	NA
LOC18033115	receptor-like protein EIX2	-5.00065	0.541101	8.57454e-17	7.5011e-16	NA	NA	NA	NA
LOC18042467	receptor-like protein 9DC3	4.99562	0.429747	1.25271e-25	1.64004e-24	NA	NA	NA	NA
LOC18055047	lachrymatory-factor synthase	-4.99454	0.224621	1.97218e-86	1.22836e-84	NA	NA	NA	NA
LOC18055110	uncharacterized LOC18055110	-4.99275	2.4294	0.000759	0.00262458	NA	NA	NA	NA
LOC18036732	uncharacterized LOC18036732	-4.99273	2.65659	0.00210892	0.00688617	NA	NA	NA	NA
LOC112099742	peptide chain release factor 1-like	4.99166	1.01009	3.95732e-06	1.74369e-05	NA	NA	NA	NA
LOC112096827	uncharacterized LOC112096827	-4.98884	1.28992	5.95061e-05	0.000233435	NA	NA	NA	NA
LOC112098347	probable S-adenosylmethionine-dependent methyltransferase At5g38780	-4.98578	3.05405	0.0049657	0.0154635	NA	NA	NA	NA
LOC18053646	beta-amyrin synthase	4.97864	0.409578	8.28402e-28	1.17553e-26	NA	NA	NA	NA
LOC18038685	ABC transporter G family member 14	-4.97748	0.30909	3.36605e-46	8.61303e-45	K05681	NA	cic02010	092
LOC112098474	putative disease resistance RPP13-like protein 1	-4.97682	0.180271	5.02965e-132	7.21599e-130	NA	NA	NA	NA
LOC112098486	(R)-limonene synthase 1, chloroplastic-like	-4.97577	0.338817	1.93866e-39	4.04109e-38	NA	NA	NA	NA
LOC18040524	probable pectinesterase/pectinesterase inhibitor 25	-4.97258	0.224993	4.11395e-85	2.52455e-83	K01051	[EC:3.1.1.11]	cic00040	004
LOC18045598	uncharacterized LOC18045598	-4.97157	0.819402	7.35853e-08	3.73274e-07	NA	NA	NA	NA
LOC112101080	probable rhamnogalacturonate lyase C	-4.97038	2.57561	0.00164742	0.00545703	NA	NA	NA	NA
LOC18043584	probable methyltransferase At1g27930	-4.96767	0.342223	6.39424e-38	1.26444e-36	NA	NA	NA	NA
LOC18032690	protein SRG1	-4.96476	2.56487	0.00158753	0.00527479	NA	NA	NA	NA
LOC18034884	protein DMR6-LIKE OXYGENASE 1	4.96111	0.396004	4.34397e-29	6.42728e-28	NA	NA	NA	NA
LOC18050842	coumaroyl-CoA:anthocyanidin 3-O-glucoside-6''-O-coumaroyltransferase 2	4.96019	0.459894	4.24439e-22	4.80654e-21	NA	NA	NA	NA
LOC18048134	SNF2 domain-containing protein CLASSY 3	-4.95766	2.38138	0.00061671	0.00215766	K10875	[EC:3.6.4.-]	cic03440	105
LOC18032294	pyruvate, phosphate dikinase, chloroplastic	-4.95511	1.44782	0.000222328	0.000820925	K01006	[EC:2.7.9.1]	cic00010;cic00620;cic00710	001;057;063
LOC112096131	uncharacterized LOC112096131	-4.95299	2.57823	0.00173253	0.0057232	NA	NA	NA	NA
LOC112099316	uncharacterized LOC112099316	-4.95215	0.30393	2.84981e-47	7.55216e-46	NA	NA	NA	NA
LOC112097236	peroxidase A2-like	-4.94729	2.60791	0.00194659	0.00639325	NA	NA	NA	NA
LOC18055676	probable caffeoyl-CoA O-methyltransferase At4g26220	-4.94382	0.182767	3.94833e-126	5.00836e-124	K00588	[EC:2.1.1.104]	cic00940;cic00941;cic00945	081;082;086
LOC112098064	disease resistance protein At4g27190-like	4.94228	0.574277	8.49917e-15	6.67452e-14	NA	NA	NA	NA
LOC18052952	omega-hydroxypalmitate O-feruloyl transferase	4.9406	1.08649	1.46344e-05	6.09488e-05	K15400	[EC:2.3.1.188]	cic00073	011
LOC18045785	chlorophyll a-b binding protein P4, chloroplastic	-4.94038	0.249962	3.52758e-69	1.60227e-67	K08910	NA	cic00196	016
LOC18031735	probable polygalacturonase	-4.93799	0.632832	2.47383e-12	1.6807e-11	NA	NA	NA	NA
LOC18044041	basic leucine zipper 43	-4.93739	1.34844	0.000111585	0.000425693	NA	NA	NA	NA
LOC18047892	transcription factor CSA	-4.93695	2.61744	0.0020758	0.00678443	K09422	NA	NA	NA
LOC112097728	putrescine-binding periplasmic protein-like	-4.93456	0.724264	1.5651e-09	8.92267e-09	NA	NA	NA	NA
LOC18040168	uncharacterized LOC18040168	-4.93447	0.246738	4.16494e-70	1.94267e-68	NA	NA	NA	NA
LOC18039306	auxin-induced protein 15A	-4.92893	0.666239	5.35314e-11	3.35426e-10	K14488	NA	cic04075	109
LOC112096748	putative glycine-rich cell wall structural protein 1	-4.92808	1.30079	8.16133e-05	0.000315518	NA	NA	NA	NA
LOC18053549	tetraspanin-19	-4.92762	0.380898	6.46298e-31	1.01778e-29	NA	NA	NA	NA
LOC112099226	uncharacterized LOC112099226	-4.92662	0.671258	6.30908e-11	3.93783e-10	NA	NA	NA	NA
LOC18055589	alpha-aminoadipic semialdehyde synthase	-4.92576	0.480785	8.73788e-20	8.7602e-19	NA	NA	NA	NA
LOC18051625	cytochrome P450 724B1	-4.92373	0.262454	8.94107e-62	3.45727e-60	K12639	[EC:1.14.13.-]	cic00905	075
LOC112097762	uncharacterized LOC112097762	-4.92307	3.44608	0.0070005	0.0213674	NA	NA	NA	NA
LOC18042484	wall-associated receptor kinase-like 1	-4.92269	2.49274	0.00125082	0.00421254	NA	NA	NA	NA
LOC112099678	disease resistance-like protein DSC1	4.91974	2.62836	0.00266616	0.00860175	NA	NA	NA	NA
LOC18040202	coiled-coil domain-containing protein SCD2	-4.91889	2.6738	0.00251057	0.00811868	NA	NA	NA	NA
LOC18043270	FT-interacting protein 1	-4.91879	0.771403	1.09867e-08	5.92574e-08	NA	NA	NA	NA
LOC18043957	dirigent protein 9	4.91762	0.817425	5.18925e-08	2.65434e-07	NA	NA	NA	NA
LOC18049409	germin-like protein subfamily 1 member 17	4.91621	0.379061	1.40318e-30	2.18491e-29	NA	NA	NA	NA
LOC112098241	uncharacterized LOC112098241	-4.91526	0.683966	9.73387e-11	5.99448e-10	NA	NA	NA	NA
LOC112098124	putative leucine-rich repeat receptor-like serine/threonine-protein kinase At2g24130	4.91057	0.632486	1.69335e-12	1.15877e-11	NA	NA	NA	NA
LOC18043307	MLO-like protein 12	-4.90972	0.516143	3.33603e-17	2.96579e-16	K08472	NA	NA	NA
LOC18050740	transcription activator GLK1	-4.90775	0.208014	6.16428e-97	4.74946e-95	NA	NA	NA	NA
LOC18052127	dirigent protein 22	-4.90742	0.207798	3.96269e-97	3.06453e-95	NA	NA	NA	NA
LOC18039197	L-ascorbate peroxidase 2, cytosolic	-4.90397	0.411456	1.41983e-26	1.91548e-25	K00434	[EC:1.11.1.11]	cic00053;cic00480	007;041
LOC18035843	putative leucine-rich repeat receptor-like protein kinase At2g19210	4.90174	0.531519	7.72649e-17	6.77061e-16	NA	NA	NA	NA
LOC112097788	putative disease resistance protein RGA3	4.89667	0.424486	5.11462e-25	6.58005e-24	NA	NA	NA	NA
LOC18044004	putative invertase inhibitor	-4.8958	0.466181	4.63568e-21	4.9556e-20	NA	NA	NA	NA
LOC18039006	lysosomal Pro-X carboxypeptidase	4.89541	0.472372	9.53004e-21	9.99262e-20	K01285	[EC:3.4.16.2]	NA	NA
LOC18040126	uncharacterized LOC18040126	-4.89348	0.419342	4.70973e-25	6.0629e-24	K00574	[EC:2.1.1.79]	NA	NA
LOC18044262	protein BIG GRAIN 1-like E	-4.8927	0.206146	9.73954e-98	7.67468e-96	NA	NA	NA	NA
LOC18050123	uncharacterized LOC18050123	-4.89114	0.255383	3.74783e-64	1.54388e-62	NA	NA	NA	NA
LOC18035620	anti-sigma-I factor RsgI6	-4.88545	0.617294	2.17634e-12	1.48149e-11	NA	NA	NA	NA
LOC18051320	plasma membrane-associated cation-binding protein 1	4.88475	0.125676	5.45347e-258	3.43783e-255	NA	NA	NA	NA
LOC112097785	putative disease resistance protein RGA3	4.88371	1.03132	8.78733e-06	3.74213e-05	NA	NA	NA	NA
LOC18053770	growth-regulating factor 6	-4.88048	0.137465	2.30753e-215	9.41246e-213	NA	NA	NA	NA
LOC18031628	cyclic nucleotide-gated ion channel 1	-4.87739	0.475991	6.52104e-20	6.5885e-19	K05391	NA	cic04626	116
LOC18044089	uncharacterized LOC18044089	-4.8763	2.56143	0.00189531	0.00623371	NA	NA	NA	NA
LOC18046780	inorganic phosphate transporter 1-4	-4.87546	1.02571	1.89931e-05	7.84888e-05	NA	NA	NA	NA
LOC18047768	hypersensitive-induced response protein 1	-4.87055	0.435137	2.45147e-23	2.94106e-22	NA	NA	NA	NA
LOC18034494	pathogenesis-related protein 1B	-4.87017	2.7578	0.00337784	0.0107626	K13449	NA	cic04016;cic04075;cic04626	107;109;116
LOC18047896	1-aminocyclopropane-1-carboxylate oxidase homolog 1	4.87012	0.393188	2.18371e-28	3.16569e-27	NA	NA	NA	NA
LOC112097792	putative disease resistance protein RGA3	4.86792	0.540162	1.41502e-15	1.15756e-14	NA	NA	NA	NA
LOC18033394	uncharacterized LOC18033394	-4.86757	1.00257	1.48738e-05	6.19087e-05	NA	NA	NA	NA
LOC18032723	21 kDa protein	-4.866	0.180447	6.78201e-126	8.44827e-124	NA	NA	NA	NA
LOC18034463	L-ascorbate oxidase homolog	-4.86009	0.395715	1.0171e-27	1.43839e-26	NA	NA	NA	NA
LOC18054309	leucine-rich repeat receptor-like protein kinase TDR	-4.85921	0.33566	1.99751e-37	3.89085e-36	NA	NA	NA	NA
LOC112095439	G-type lectin S-receptor-like serine/threonine-protein kinase LECRK2	4.85624	1.38523	0.000192489	0.000716343	NA	NA	NA	NA
LOC112100590	small nucleolar RNA Z162	4.85586	1.47016	0.000321484	0.00116249	NA	NA	NA	NA
LOC18041775	glutathione S-transferase zeta class	4.85511	0.359788	4.20239e-33	7.11907e-32	NA	NA	NA	NA
LOC18033287	major allergen Pru ar 1	-4.85386	0.658339	3.6155e-11	2.28959e-10	NA	NA	NA	NA
LOC18049742	protein NRT1/ PTR FAMILY 7.2	4.84551	0.545136	1.1236e-15	9.25712e-15	NA	NA	NA	NA
LOC18040326	probable LRR receptor-like serine/threonine-protein kinase At4g36180	-4.84153	0.32025	8.96639e-41	1.95522e-39	NA	NA	NA	NA
LOC18046162	uncharacterized LOC18046162	-4.83828	0.469245	5.58233e-20	5.65381e-19	NA	NA	NA	NA
LOC18038018	protein trichome birefringence-like 34	-4.83633	2.39326	0.00093536	0.00319512	NA	NA	NA	NA
LOC18031231	GDSL esterase/lipase At3g27950	4.83371	0.338426	5.34273e-37	1.02061e-35	NA	NA	NA	NA
LOC18042712	dihydroflavonol 4-reductase	-4.83357	2.56134	0.0020267	0.00663752	K13082	[EC:1.1.1.219 1.1.1.234]	cic00941	082
LOC18032223	cellulose synthase-like protein G2	-4.83338	0.214812	1.82124e-87	1.16219e-85	NA	NA	NA	NA
LOC112101217	probable caffeine synthase 4	4.83337	1.56557	0.000601326	0.00210596	NA	NA	NA	NA
LOC18054046	6-hydroxynicotinate 3-monooxygenase	-4.82984	0.308917	5.0148e-44	1.20604e-42	NA	NA	NA	NA
LOC18053194	G-type lectin S-receptor-like serine/threonine-protein kinase At2g19130	4.82692	0.544807	1.22615e-15	1.00741e-14	NA	NA	NA	NA
LOC112098516	protein FAR1-RELATED SEQUENCE 5-like	-4.82581	3.00007	0.00527847	0.0163844	NA	NA	NA	NA
LOC18031336	potassium channel SKOR	4.82575	0.291755	1.46375e-48	3.99612e-47	K21867	NA	NA	NA
LOC18037487	U-box domain-containing protein 27	-4.82396	1.34527	0.000158817	0.000595185	NA	NA	NA	NA
LOC18036480	thionin-like protein 2	-4.82171	2.60895	0.00245388	0.00794011	NA	NA	NA	NA
LOC18052204	nudix hydrolase 2	-4.81967	0.451005	2.21873e-21	2.41277e-20	NA	NA	NA	NA
LOC18049003	translocator protein homolog	4.81965	0.180614	1.88134e-122	2.26229e-120	K05770	NA	NA	NA
LOC18041487	protein WALLS ARE THIN 1	-4.8185	0.533999	1.15431e-15	9.50637e-15	NA	NA	NA	NA
LOC18042020	auxin efflux carrier component 6	-4.81722	0.63368	1.16545e-11	7.60503e-11	K13947	NA	NA	NA
LOC18052685	endoglucanase 8	-4.81703	0.174132	3.04745e-131	4.28352e-129	K01179	[EC:3.2.1.4]	cic00500	042
LOC18041971	cannabidiolic acid synthase-like 2	4.81663	2.80874	0.00447184	0.0140271	NA	NA	NA	NA
LOC112097690	methionine S-methyltransferase-like	-4.81482	0.488541	1.40359e-18	1.33755e-17	NA	NA	NA	NA
LOC112096830	receptor-like protein EIX2	-4.81243	1.0741	4.04513e-05	0.00016127	NA	NA	NA	NA
LOC18041599	WEB family protein At1g75720	-4.81138	2.75177	0.00362712	0.0115251	NA	NA	NA	NA
LOC18047428	14 kDa proline-rich protein DC2.15	-4.81035	0.135057	6.74309e-216	2.80553e-213	NA	NA	NA	NA
LOC18041806	probable histone H2A.5	-4.80703	0.19328	3.53688e-106	3.18518e-104	K11251	NA	NA	NA
LOC18055004	transcription factor bHLH35	-4.80688	0.471845	6.95768e-20	7.01943e-19	NA	NA	NA	NA
LOC112097103	small nucleolar RNA R71	-4.80676	2.54969	0.00206168	0.00673933	NA	NA	NA	NA
LOC18051764	protein POLLENLESS 3	-4.8039	0.491675	4.41273e-18	4.12946e-17	NA	NA	NA	NA
LOC18048514	acyl transferase 4	-4.80254	2.49457	0.00166736	0.00551798	NA	NA	NA	NA
LOC18042459	alcohol dehydrogenase-like 2	4.80066	0.761973	5.48222e-09	3.01312e-08	K00121	[EC:1.1.1.284 1.1.1.1]	cic00010;cic00071;cic00350;cic00620	001;010;031;057
LOC18037667	caffeic acid 3-O-methyltransferase	4.79828	0.173603	2.21554e-131	3.13537e-129	K13066	[EC:2.1.1.68 2.1.1.4]	cic00380;cic00940	033;081
LOC18046698	protein DOWNY MILDEW RESISTANCE 6	4.79756	0.246303	9.78954e-67	4.29645e-65	NA	NA	NA	NA
LOC18034696	extra-large guanine nucleotide-binding protein 1	-4.79673	0.769355	2.01573e-08	1.06809e-07	NA	NA	NA	NA
LOC18031188	probable membrane-associated kinase regulator 6	-4.79299	2.79681	0.0041703	0.0131307	NA	NA	NA	NA
LOC112096306	disease resistance protein At4g27190-like	4.78723	1.09454	4.98519e-05	0.000196787	NA	NA	NA	NA
LOC112099137	uncharacterized LOC112099137	4.78536	4.02599	0.0137668	0.0400771	NA	NA	NA	NA
LOC18045287	THO complex subunit 4B	-4.78499	0.711726	3.17433e-09	1.77182e-08	K12881	NA	cic03013;cic03015	094;095
LOC18035920	extensin	-4.78339	2.48124	0.00164886	0.00546024	NA	NA	NA	NA
LOC18038222	NADPH-dependent aldo-keto reductase, chloroplastic	-4.78301	1.31161	0.00013471	0.00050878	K00002	[EC:1.1.1.2]	cic00010;cic00040;cic00053;cic00561;cic00620	001;004;007;047;057
LOC18043537	MLP-like protein 423	4.78269	0.191286	3.12202e-108	2.92556e-106	NA	NA	NA	NA
LOC18048532	TMV resistance protein N	-4.77657	0.226907	6.84242e-77	3.63119e-75	NA	NA	NA	NA
LOC112095428	LRR receptor-like serine/threonine-protein kinase FLS2	-4.77457	2.57961	0.00241868	0.00783735	NA	NA	NA	NA
LOC18052640	protein EPIDERMAL PATTERNING FACTOR 1	-4.77372	1.27317	0.000105481	0.000403664	K20729	NA	cic04016	107
LOC18047409	LIM domain-containing protein PLIM2b	4.7713	1.83487	0.00176831	0.00583537	NA	NA	NA	NA
LOC18055854	aspartic proteinase CDR1	4.77122	0.623822	3.95833e-12	2.66145e-11	NA	NA	NA	NA
LOC18049703	pescadillo homolog	-4.77	2.41073	0.00121379	0.00409244	NA	NA	NA	NA
LOC18041318	non-functional pseudokinase ZED1	4.76692	1.80776	0.0016155	0.00536085	NA	NA	NA	NA
LOC18050824	uncharacterized LOC18050824	-4.76536	2.45906	0.00157189	0.00523034	NA	NA	NA	NA
LOC18052647	expansin-B3	-4.76401	0.549898	1.62169e-14	1.25647e-13	K20628	NA	NA	NA
LOC18043150	protein CUP-SHAPED COTYLEDON 3	-4.76276	0.864727	7.96317e-07	3.74453e-06	NA	NA	NA	NA
LOC18049460	uncharacterized LOC18049460	-4.75613	2.336	0.000812267	0.00279761	NA	NA	NA	NA
LOC18033337	two-component response regulator ARR9	-4.75515	2.62997	0.00293261	0.00940887	K14492	NA	cic04075	109
LOC18045274	beta-hexosaminidase 2	-4.75479	2.54055	0.00220149	0.00717045	K12373	[EC:3.2.1.52]	cic00513;cic00520;cic00531;cic00600;cic00603;cic00604	044;045;046;054;055;056
LOC18043758	uncharacterized LOC18043758	4.75407	0.447437	2.8041e-21	3.02561e-20	NA	NA	NA	NA
LOC18047938	ethylene-responsive transcription factor 2	-4.75289	2.46423	0.00161383	0.00535701	NA	NA	NA	NA
LOC18032380	glutathione transferase GST 23	4.7514	0.186341	1.94558e-111	1.90018e-109	K00799	[EC:2.5.1.18]	cic00480	041
LOC18041198	cytochrome P450 CYP82D47	4.75127	0.504345	2.82698e-17	2.52836e-16	NA	NA	NA	NA
LOC18052948	glutaredoxin-C1	-4.75122	1.39692	0.00027569	0.00100564	NA	NA	NA	NA
LOC18052053	linoleate 13S-lipoxygenase 2-1, chloroplastic	-4.75029	0.787204	4.8238e-08	2.47838e-07	K00454	[EC:1.13.11.12]	cic00591;cic00592	052;053
LOC18037995	uncharacterized acetyltransferase At3g50280	-4.74889	0.256509	1.07706e-59	3.9103e-58	NA	NA	NA	NA
LOC112099239	uncharacterized LOC112099239	-4.74885	2.46231	0.0016343	0.00541979	NA	NA	NA	NA
LOC18038200	uncharacterized LOC18038200	-4.74853	2.48325	0.00177987	0.00587165	NA	NA	NA	NA
LOC18047672	probable phosphoinositide phosphatase SAC9	-4.74348	0.353093	1.2026e-32	2.00303e-31	NA	NA	NA	NA
LOC112100742	dehydrin HIRD11-like	4.73554	0.157116	5.98736e-155	1.20927e-152	NA	NA	NA	NA
LOC18041819	transcription factor bHLH96	-4.73461	2.51224	0.00205359	0.00671741	NA	NA	NA	NA
LOC18051499	uncharacterized LOC18051499	4.73183	0.384757	1.02731e-27	1.45184e-26	NA	NA	NA	NA
LOC112101038	LEAF RUST 10 DISEASE-RESISTANCE LOCUS RECEPTOR-LIKE PROTEIN KINASE-like 2.4	-4.73029	2.69549	0.00359133	0.0114184	NA	NA	NA	NA
LOC18037210	uncharacterized LOC18037210	-4.72937	2.42806	0.00144275	0.00482533	NA	NA	NA	NA
LOC18031489	probable WRKY transcription factor 27	-4.72895	2.54535	0.00235635	0.00764728	NA	NA	NA	NA
LOC18038858	probable LRR receptor-like serine/threonine-protein kinase At3g47570	-4.72783	0.595211	1.42942e-12	9.83992e-12	NA	NA	NA	NA
LOC18036005	ankyrin repeat-containing protein ITN1	-4.72561	0.274519	9.53274e-52	2.82895e-50	NA	NA	NA	NA
LOC18038630	amino acid transporter AVT1D	-4.72493	2.93849	0.0056269	0.0173752	K15015	NA	NA	NA
LOC18036526	tubby-like protein 8	-4.72462	0.442949	4.04788e-21	4.33838e-20	K19600	NA	NA	NA
LOC18034627	luminal-binding protein 5	-4.72395	2.56775	0.00254567	0.0082296	K09490	[EC:3.6.4.10]	cic03060;cic04141	101;112
LOC112096843	uncharacterized LOC112096843	4.72139	1.59266	0.000755063	0.0026114	NA	NA	NA	NA
LOC112100315	uncharacterized LOC112100315	-4.72105	0.435657	3.46768e-22	3.94845e-21	NA	NA	NA	NA
LOC18046288	probable LRR receptor-like serine/threonine-protein kinase At3g47570	-4.72087	1.40386	0.000308429	0.00111898	NA	NA	NA	NA
LOC112095843	uncharacterized LOC112095843	4.72029	0.333762	3.21767e-36	6.00334e-35	NA	NA	NA	NA
LOC18036784	dormancy-associated protein homolog 4	4.71998	0.25742	6.64016e-59	2.36939e-57	NA	NA	NA	NA
LOC18054174	probable disease resistance protein At4g27220	-4.71703	1.38558	0.000279744	0.00101936	NA	NA	NA	NA
LOC112101055	uncharacterized LOC112101055	-4.71648	1.28924	0.000143485	0.000540746	K01514	[EC:3.6.1.11]	cic00230	018
LOC18033704	basic form of pathogenesis-related protein 1	-4.71601	2.6139	0.00296513	0.00950439	K13449	NA	cic04016;cic04075;cic04626	107;109;116
LOC18054575	putative beta-glucosidase 41	4.71591	0.678991	2.12913e-10	1.28198e-09	K01188	[EC:3.2.1.21]	cic00460;cic00500;cic00999	039;042;091
LOC18035694	protein IRX15-LIKE	-4.71522	2.68937	0.00364532	0.0115777	NA	NA	NA	NA
LOC18037834	transcription factor bHLH61	-4.7142	0.183618	1.10418e-112	1.11506e-110	NA	NA	NA	NA
LOC18033765	auxin-responsive protein SAUR21	-4.71414	2.76446	0.00422627	0.0132989	K14488	NA	cic04075	109
LOC18052097	cyclin-SDS	-4.70357	0.585067	9.85322e-13	6.83939e-12	K21777	NA	NA	NA
LOC18035420	protein DMR6-LIKE OXYGENASE 2	4.70284	0.223217	4.48463e-77	2.3983e-75	NA	NA	NA	NA
LOC18035124	flavanone 7-O-glucoside 2''-O-beta-L-rhamnosyltransferase	4.70226	2.25602	0.000793968	0.00273776	NA	NA	NA	NA
LOC18035539	uncharacterized LOC18035539	4.70111	1.19261	7.98464e-05	0.000309204	NA	NA	NA	NA
LOC18038128	MDIS1-interacting receptor like kinase 2	-4.70034	1.35217	0.000348053	0.00125378	NA	NA	NA	NA
LOC18053412	zinc finger CCCH domain-containing protein 43	-4.69987	0.390843	1.77115e-26	2.38173e-25	NA	NA	NA	NA
LOC18032370	leucine-rich repeat extensin-like protein 6	4.69957	0.29048	1.47705e-46	3.83609e-45	NA	NA	NA	NA
LOC112096224	F-box/kelch-repeat protein At3g23880-like	-4.69436	2.50337	0.00217093	0.00707645	NA	NA	NA	NA
LOC18047387	cytochrome P450 71A1	4.68973	0.444514	2.76996e-21	2.99343e-20	NA	NA	NA	NA
LOC18039319	putative homeobox-leucine zipper protein ATHB-51	-4.68903	0.195119	8.7161e-99	7.00082e-97	NA	NA	NA	NA
LOC18047553	oligopeptide transporter 7	-4.68308	0.408866	4.88359e-24	6.05443e-23	NA	NA	NA	NA
LOC18051788	probable NAD(P)H dehydrogenase (quinone) FQR1-like 1	4.67993	0.349861	4.68927e-32	7.64505e-31	K03809	[EC:1.6.5.2]	cic00130	013
LOC18036292	uncharacterized LOC18036292	-4.67594	2.66101	0.00363448	0.0115468	NA	NA	NA	NA
LOC18046938	disease resistance RPP13-like protein 4	4.6757	0.592317	9.71471e-13	6.7455e-12	NA	NA	NA	NA
LOC112099066	phosphatidylinositol-3-phosphatase myotubularin-1-like	-4.67346	0.242828	3.07061e-64	1.26994e-62	NA	NA	NA	NA
LOC18055410	protein ACCELERATED CELL DEATH 6	-4.67342	0.142516	4.38862e-182	1.17047e-179	NA	NA	NA	NA
LOC18052816	uncharacterized LOC18052816	-4.67329	0.51234	5.67037e-16	4.73737e-15	NA	NA	NA	NA
LOC18049827	hydroquinone glucosyltransferase	4.66732	0.158354	6.03772e-148	1.0922e-145	K08237	[EC:2.4.1.218]	NA	NA
LOC18036901	cytochrome P450 CYP736A12	4.66359	0.941036	1.39842e-06	6.44043e-06	NA	NA	NA	NA
LOC18051932	LRR receptor-like serine/threonine-protein kinase RPK2	-4.66316	0.261149	7.35354e-56	2.41287e-54	NA	NA	NA	NA
LOC18042369	7-deoxyloganetin glucosyltransferase	4.66178	0.337839	1.11854e-34	1.99735e-33	NA	NA	NA	NA
LOC112096218	peroxiredoxin-2-like	4.66042	0.276759	9.68934e-50	2.73869e-48	NA	NA	NA	NA
LOC18038067	F-box protein At2g02240	4.65822	0.248226	2.64722e-61	1.01046e-59	NA	NA	NA	NA
LOC18055352	EG45-like domain containing protein 2	4.65785	0.292483	5.05247e-45	1.25575e-43	NA	NA	NA	NA
LOC18049088	TMV resistance protein N	-4.65618	1.44337	0.000421903	0.00150211	NA	NA	NA	NA
LOC18041397	TMV resistance protein N	4.65583	1.18289	0.000172289	0.000644163	NA	NA	NA	NA
LOC112098399	uncharacterized LOC112098399	4.65406	2.88832	0.00637243	0.0195438	NA	NA	NA	NA
LOC18054050	aurachin C monooxygenase/isomerase	4.65385	0.61308	4.49251e-12	3.00603e-11	NA	NA	NA	NA
LOC18037022	nodulation receptor kinase	4.64392	0.304057	3.4116e-41	7.59726e-40	NA	NA	NA	NA
LOC18037540	mitogen-activated protein kinase kinase kinase 5	-4.64083	2.4594	0.00203662	0.00666685	NA	NA	NA	NA
LOC112101192	uncharacterized LOC112101192	-4.63945	2.41081	0.00165639	0.0054843	NA	NA	NA	NA
LOC18033738	60S ribosomal protein L14-1	4.63837	0.412325	1.97553e-23	2.37829e-22	NA	NA	NA	NA
LOC18042706	serine carboxypeptidase-like 2	4.63328	0.181376	4.41042e-112	4.34834e-110	K16296	[EC:3.4.16.-]	NA	NA
LOC18038016	cytochrome P450 85A	-4.63178	0.114803	3.88121e-274	2.9904e-271	K09590	[EC:1.14.-.-]	cic00905	075
LOC18039072	glycerol-3-phosphate 2-O-acyltransferase 6	4.63042	0.259816	1.3653e-55	4.44481e-54	K13508	[EC:2.3.1.15 2.3.1.198]	cic00561;cic00564	047;049
LOC18031810	uncharacterized LOC18031810	-4.62999	0.998638	3.60585e-05	0.000144533	NA	NA	NA	NA
LOC112100905	uncharacterized LOC112100905	-4.62835	0.708425	5.26519e-09	2.8946e-08	NA	NA	NA	NA
LOC18050359	cytochrome P450 83B1	-4.6272	0.3781	4.32127e-27	5.9494e-26	NA	NA	NA	NA
LOC112096597	small nucleolar RNA snoR136	-4.62202	2.44958	0.00201937	0.00661559	NA	NA	NA	NA
LOC18055146	probable L-type lectin-domain containing receptor kinase S.7	-4.62079	0.741082	3.32165e-08	1.72665e-07	NA	NA	NA	NA
LOC18033781	NDR1/HIN1-like protein 1	-4.62033	0.271299	1.49957e-50	4.32073e-49	NA	NA	NA	NA
LOC18042735	UDP-glycosyltransferase 83A1	4.61578	0.317959	2.13484e-37	4.1467e-36	NA	NA	NA	NA
LOC18045502	transcription factor PAR1	-4.61571	0.23936	2.0977e-64	8.71028e-63	NA	NA	NA	NA
LOC18050317	uncharacterized LOC18050317	-4.61403	0.410942	2.39255e-23	2.87203e-22	NA	NA	NA	NA
LOC18037723	uncharacterized protein At5g65660	4.61238	0.292833	4.9027e-44	1.18045e-42	NA	NA	NA	NA
LOC18037139	probable disease resistance protein At5g63020	-4.61225	0.568836	9.25209e-13	6.43071e-12	NA	NA	NA	NA
LOC18054111	uncharacterized LOC18054111	-4.60506	0.100564	0	0	NA	NA	NA	NA
LOC18044859	homeobox protein knotted-1-like 6	-4.60292	1.38168	0.000369224	0.00132568	NA	NA	NA	NA
LOC112098623	U5 spliceosomal RNA	-4.6024	2.40087	0.00174482	0.00575969	NA	NA	NA	NA
LOC18041854	isoflavone reductase homolog TP7	4.60181	0.129662	1.4029e-212	5.61239e-210	K23050	[EC:1.3.1.-]	NA	NA
LOC112098420	putative disease resistance RPP13-like protein 1	-4.60042	0.166584	5.54731e-129	7.6154e-127	NA	NA	NA	NA
LOC18049462	dehydration-responsive element-binding protein 1B	-4.59663	1.49265	0.000671821	0.00233945	NA	NA	NA	NA
LOC18055837	probable serine incorporator	-4.59455	0.331497	3.24076e-34	5.69404e-33	K23544	NA	NA	NA
LOC18040552	synaptotagmin-2	-4.59419	1.36084	0.000333486	0.00120422	NA	NA	NA	NA
LOC18043425	protein JINGUBANG	-4.59017	0.238346	5.46073e-64	2.24505e-62	NA	NA	NA	NA
LOC18050348	flavonol 3-sulfotransferase	-4.58727	0.422309	7.43739e-22	8.31828e-21	NA	NA	NA	NA
LOC18041246	serine/threonine-protein kinase Nek1	-4.5849	0.112472	7.7507e-278	6.20145e-275	K08857	[EC:2.7.11.1]	NA	NA
LOC112098400	uncharacterized LOC112098400	4.58237	2.12551	0.000790115	0.00272583	NA	NA	NA	NA
LOC18052315	protein BREAST CANCER SUSCEPTIBILITY 1 homolog	-4.57953	0.258089	1.08064e-54	3.44792e-53	K10683	NA	cic03440	105
LOC112097892	uncharacterized LOC112097892	4.57361	1.8754	0.002642	0.00852779	NA	NA	NA	NA
LOC18050423	cationic amino acid transporter 7, chloroplastic	-4.57286	0.444757	8.19435e-20	8.23512e-19	NA	NA	NA	NA
LOC18052626	uncharacterized LOC18052626	-4.56651	0.750896	6.36613e-08	3.24118e-07	NA	NA	NA	NA
LOC112097548	5S ribosomal RNA	-4.56145	2.67418	0.00441702	0.0138677	NA	NA	NA	NA
LOC18033509	zinc finger BED domain-containing protein RICESLEEPER 2	4.55975	3.80267	0.0132449	0.0386496	NA	NA	NA	NA
LOC18051621	heavy metal-associated isoprenylated plant protein 16	-4.55753	1.16502	0.000188246	0.000701554	NA	NA	NA	NA
LOC18034058	monooxygenase 2	4.5574	0.408887	8.38833e-23	9.83112e-22	NA	NA	NA	NA
LOC18051592	1-acyl-sn-glycerol-3-phosphate acyltransferase 3	-4.55143	0.319315	7.22154e-36	1.32947e-34	K13523	[EC:2.3.1.51 2.3.1.-]	cic00561;cic00564	047;049
LOC18050975	bidirectional sugar transporter SWEET4	4.54953	1.26365	0.000362761	0.00130405	K15382	NA	NA	NA
LOC18048054	UDP-glycosyltransferase 74F2	4.54923	2.9678	0.00739816	0.0224973	K13691	[EC:2.4.1.-]	NA	NA
LOC18033879	dehydrodolichyl diphosphate synthase 2	-4.54695	0.818062	3.68193e-07	1.77386e-06	NA	NA	NA	NA
LOC112098536	putative disease resistance RPP13-like protein 1	-4.54628	0.181957	1.02264e-105	9.13047e-104	NA	NA	NA	NA
LOC18039448	uncharacterized LOC18039448	-4.54271	2.4494	0.00240521	0.00779734	NA	NA	NA	NA
LOC18051040	uncharacterized LOC18051040	-4.54136	0.582055	5.44876e-12	3.62606e-11	NA	NA	NA	NA
LOC18041056	indole-3-acetic acid-amido synthetase GH3.17	-4.54006	2.42871	0.00224062	0.00729219	K14487	NA	cic04075	109
LOC18055681	metallothiol transferase FosB	4.53858	0.44134	4.15557e-20	4.23144e-19	NA	NA	NA	NA
LOC18049000	protein RALF-like 33	-4.53128	1.33546	0.000338291	0.0012203	NA	NA	NA	NA
LOC18036481	multicopper oxidase LPR1	-4.52965	1.16663	0.000225743	0.000832794	NA	NA	NA	NA
LOC18050865	polygalacturonase QRT3	-4.52953	0.189418	3.54953e-97	2.75526e-95	NA	NA	NA	NA
LOC112100288	heavy metal-associated isoprenylated plant protein 39	4.5282	0.132232	1.03981e-196	3.43353e-194	NA	NA	NA	NA
LOC18049203	protein IQ-DOMAIN 1	-4.52595	0.419795	2.31449e-21	2.51034e-20	NA	NA	NA	NA
LOC18048242	1-aminocyclopropane-1-carboxylate synthase 1	4.52542	0.413457	1.54256e-22	1.7798e-21	K20772	[EC:4.4.1.14]	cic00270;cic04016	024;107
LOC18034340	purple acid phosphatase 2	-4.52498	0.296744	9.45776e-41	2.06021e-39	K22390	NA	NA	NA
LOC18046399	probable methionine--tRNA ligase	-4.52493	2.62255	0.0041694	0.0131307	K01874	[EC:6.1.1.10]	cic00450;cic00970	038;090
LOC18031904	organic cation/carnitine transporter 3	-4.52451	2.85299	0.00629423	0.0193296	NA	NA	NA	NA
LOC18034346	receptor-like protein EIX2	-4.5233	3.3624	0.0094811	0.0283425	NA	NA	NA	NA
LOC18054424	geraniol 8-hydroxylase	4.51719	1.97297	0.00347012	0.0110482	NA	NA	NA	NA
LOC18048854	putative cell division cycle ATPase	-4.51624	0.175015	1.70769e-112	1.70793e-110	NA	NA	NA	NA
LOC112101090	uncharacterized LOC112101090	4.51561	2.40412	0.00278653	0.00896369	NA	NA	NA	NA
LOC18033896	probable leucine-rich repeat receptor-like protein kinase At1g35710	4.51503	0.820819	3.32668e-07	1.6083e-06	NA	NA	NA	NA
LOC18055625	protein EFFECTOR OF TRANSCRIPTION 2	-4.51026	0.164184	5.76154e-128	7.78295e-126	NA	NA	NA	NA
LOC18053481	O-acyltransferase WSD1	4.51006	0.827523	4.56665e-07	2.18291e-06	NA	NA	NA	NA
LOC18053151	putative lipid-transfer protein DIR1	-4.50879	1.15961	0.000223909	0.000826322	NA	NA	NA	NA
LOC18037023	G-type lectin S-receptor-like serine/threonine-protein kinase CES101	-4.50816	2.42064	0.00226871	0.00737783	NA	NA	NA	NA
LOC112100887	uncharacterized LOC112100887	-4.5075	0.463566	1.34324e-17	1.22398e-16	NA	NA	NA	NA
LOC18044674	RING-H2 finger protein ATL64	4.50342	0.385849	4.52981e-25	5.8349e-24	K16282	[EC:2.3.2.27]	NA	NA
LOC18045296	sulfated surface glycoprotein 185	-4.50275	0.171652	3.66497e-116	3.99174e-114	NA	NA	NA	NA
LOC18047859	dehydrodolichyl diphosphate synthase 6	4.50209	2.89329	0.00743041	0.0225789	K11778	[EC:2.5.1.87]	cic00900	072
LOC18036274	G2/mitotic-specific cyclin-2	-4.49972	0.364797	3.4517e-27	4.78386e-26	K21777	NA	NA	NA
LOC18031220	somatic embryogenesis receptor kinase 1	-4.49955	0.328681	3.05783e-33	5.20131e-32	NA	NA	NA	NA
LOC18038301	uncharacterized LOC18038301	-4.49882	0.29636	3.52218e-40	7.53051e-39	NA	NA	NA	NA
LOC112098456	uncharacterized LOC112098456	4.49799	0.33797	7.85643e-32	1.27288e-30	NA	NA	NA	NA
LOC112097705	putative disease resistance protein At3g14460	-4.49175	0.456395	4.81787e-18	4.50252e-17	NA	NA	NA	NA
LOC18052295	uncharacterized LOC18052295	-4.49024	0.243235	1.11504e-58	3.95164e-57	NA	NA	NA	NA
LOC112098494	putative disease resistance RPP13-like protein 1	-4.48983	0.234268	7.57703e-63	3.03709e-61	NA	NA	NA	NA
LOC18044137	carbonic anhydrase 2	4.48648	0.129715	4.25449e-200	1.42752e-197	K01673	[EC:4.2.1.1]	cic00910	079
LOC18040246	cysteine-rich receptor-like protein kinase 10	4.48375	1.1214	8.5006e-05	0.000328085	NA	NA	NA	NA
LOC112101458	uncharacterized LOC112101458	-4.48355	0.689193	7.80117e-09	4.2506e-08	NA	NA	NA	NA
LOC112095567	(-)-germacrene D synthase-like	4.48298	2.30127	0.00209651	0.00684887	NA	NA	NA	NA
LOC18053261	chlorophyll a-b binding protein of LHCII type 1	-4.47843	0.162892	5.38115e-127	7.08506e-125	K08912	NA	cic00196	016
LOC18043021	bifunctional pinoresinol-lariciresinol reductase 2	-4.47836	2.70744	0.00532464	0.0165129	K21568	[EC:1.23.1.1 1.23.1.2 1.23.1.3 1.23.1.4]	cic00999	091
LOC18052664	beta-galactosidase 8	-4.4776	2.41664	0.00243134	0.00787594	NA	NA	NA	NA
LOC18041456	disease resistance protein At4g27190	-4.4775	2.47021	0.00295642	0.00947942	NA	NA	NA	NA
LOC18049650	GDSL esterase/lipase At5g33370	4.47613	0.253841	3.94954e-54	1.23925e-52	NA	NA	NA	NA
LOC18041531	cytochrome P450 CYP82D47	4.47608	1.44021	0.00130005	0.00437196	NA	NA	NA	NA
LOC112095811	receptor-like protein EIX1	4.47226	0.762152	7.04135e-08	3.5762e-07	NA	NA	NA	NA
LOC18039148	zinc finger protein CONSTANS-LIKE 2	-4.47208	0.248338	6.54297e-56	2.15711e-54	NA	NA	NA	NA
LOC18036211	salicylic acid-binding protein 2	-4.47043	0.21217	3.77611e-76	1.99377e-74	NA	NA	NA	NA
LOC112097882	putative disease resistance protein RGA3	-4.46988	0.652353	4.7459e-10	2.79211e-09	NA	NA	NA	NA
LOC112096297	disease resistance protein At4g27190-like	4.46985	0.253379	9.52528e-54	2.95753e-52	NA	NA	NA	NA
LOC18053341	glutamate receptor 2.7	-4.46852	2.73848	0.00565136	0.0174352	NA	NA	NA	NA
LOC18035773	probable receptor-like protein kinase At2g23200	-4.46847	0.462489	1.66078e-17	1.50476e-16	NA	NA	NA	NA
LOC112100383	uncharacterized LOC112100383	-4.46701	0.39161	1.5126e-23	1.83052e-22	NA	NA	NA	NA
LOC18046299	anthranilate N-methyltransferase	-4.46575	0.218988	5.81389e-71	2.76133e-69	K13066	[EC:2.1.1.68 2.1.1.4]	cic00380;cic00940	033;081
LOC18043949	protein disulfide isomerase-like 1-3	-4.46546	0.349622	2.88582e-29	4.32831e-28	NA	NA	NA	NA
LOC18041363	cytochrome P450 83B1	4.46477	0.372532	2.25647e-26	3.02653e-25	NA	NA	NA	NA
LOC112100294	arabinogalactan peptide 14-like	-4.46397	0.31966	2.09473e-34	3.71181e-33	NA	NA	NA	NA
LOC18053438	late embryogenesis abundant protein 1	4.46372	0.790521	1.65593e-07	8.18641e-07	NA	NA	NA	NA
LOC18034020	uncharacterized LOC18034020	4.46301	0.415475	2.27703e-21	2.47358e-20	NA	NA	NA	NA
LOC18042743	uncharacterized LOC18042743	-4.46242	1.23904	0.000213699	0.000790324	NA	NA	NA	NA
LOC18032975	late embryogenesis abundant protein D-34	-4.45937	1.13958	0.000227639	0.000839047	NA	NA	NA	NA
LOC18043961	caffeoylshikimate esterase	4.45891	0.240285	1.72893e-59	6.20121e-58	K18368	[EC:3.1.1.-]	cic00940	081
LOC18035463	nuclear transcription factor Y subunit B-10	-4.45789	0.401008	1.26657e-22	1.47116e-21	NA	NA	NA	NA
LOC112096126	uncharacterized LOC112096126	-4.45714	2.6933	0.00528966	0.0164148	NA	NA	NA	NA
LOC18035994	ABC transporter G family member 29	-4.4561	0.535733	1.5177e-13	1.10394e-12	NA	NA	NA	NA
LOC18049091	TMV resistance protein N	-4.45583	0.286545	1.34813e-42	3.1196e-41	NA	NA	NA	NA
LOC18055801	monogalactosyldiacylglycerol synthase 2, chloroplastic	-4.45478	0.426937	5.36556e-20	5.44753e-19	K03715	[EC:2.4.1.46]	cic00561	047
LOC18053823	early nodulin-like protein 3	4.45466	0.4534	1.81228e-18	1.71914e-17	NA	NA	NA	NA
LOC18044238	beta-glucosidase 40	4.45327	0.155311	4.04615e-138	6.47477e-136	K01188	[EC:3.2.1.21]	cic00460;cic00500;cic00999	039;042;091
LOC112097793	putative disease resistance protein RGA4	4.45192	0.70726	2.01563e-08	1.06809e-07	NA	NA	NA	NA
LOC18049738	endoglucanase 12	-4.4509	2.5614	0.00398964	0.012602	NA	NA	NA	NA
LOC18044186	uncharacterized LOC18044186	-4.45019	2.66422	0.00511703	0.0158999	NA	NA	NA	NA
LOC112100209	uncharacterized LOC112100209	-4.44789	0.532775	1.22165e-13	8.92974e-13	NA	NA	NA	NA
LOC112097888	putative disease resistance protein RGA1	4.44714	2.04929	0.000771121	0.00266428	NA	NA	NA	NA
LOC18048424	probable low-specificity L-threonine aldolase 1	-4.44102	0.275987	7.00835e-45	1.73153e-43	K01620	[EC:4.1.2.48]	cic00260	022
LOC112097403	transmembrane 9 superfamily member 2-like	-4.43852	2.40931	0.00257702	0.00832708	NA	NA	NA	NA
LOC18054745	probable pectinesterase/pectinesterase inhibitor 12	4.43845	0.312641	1.32235e-35	2.4173e-34	NA	NA	NA	NA
LOC112098410	uncharacterized LOC112098410	-4.43836	1.15968	0.000273164	0.000997303	NA	NA	NA	NA
LOC18044631	folylpolyglutamate synthase	-4.43777	0.294832	9.178e-40	1.93641e-38	NA	NA	NA	NA
LOC18053152	uncharacterized LOC18053152	4.43501	0.673297	2.98592e-09	1.66934e-08	NA	NA	NA	NA
LOC112101156	probable sugar phosphate/phosphate translocator At1g06470	-4.43454	0.351203	2.52688e-28	3.65555e-27	NA	NA	NA	NA
LOC18041004	protein NUCLEAR FUSION DEFECTIVE 4	4.43434	0.148983	2.53221e-148	4.62084e-146	NA	NA	NA	NA
LOC18051358	uncharacterized LOC18051358	4.4323	0.809395	1.56729e-06	7.19105e-06	NA	NA	NA	NA
LOC112095423	MDIS1-interacting receptor like kinase 2-like	-4.43182	1.81598	0.00244538	0.00791647	NA	NA	NA	NA
LOC18039380	protein CHLORORESPIRATORY REDUCTION 7, chloroplastic	-4.42902	0.316035	2.11123e-34	3.73786e-33	NA	NA	NA	NA
LOC18054479	14 kDa proline-rich protein DC2.15	4.42762	0.289828	4.48891e-41	9.91326e-40	NA	NA	NA	NA
LOC18045018	protein JINGUBANG	-4.42533	0.76563	2.61847e-07	1.27599e-06	NA	NA	NA	NA
LOC18043375	uncharacterized LOC18043375	-4.42354	0.656965	2.03739e-09	1.15361e-08	NA	NA	NA	NA
LOC18044002	probable purine permease 11	-4.41305	2.57226	0.00439567	0.0138069	NA	NA	NA	NA
LOC112098461	uncharacterized LOC112098461	-4.40669	1.26377	0.000298696	0.00108537	NA	NA	NA	NA
LOC18051750	berberine bridge enzyme-like 22	-4.40462	2.30244	0.00173465	0.00572792	NA	NA	NA	NA
LOC18055556	protein STRICTOSIDINE SYNTHASE-LIKE 4	4.40246	0.575709	7.31733e-12	4.83707e-11	NA	NA	NA	NA
LOC18038903	tropinone reductase homolog	-4.40233	0.522565	4.65057e-14	3.49515e-13	K08081	[EC:1.1.1.206]	cic00960	088
LOC18047316	probable polygalacturonase	-4.40153	0.136635	4.73814e-173	1.14613e-170	NA	NA	NA	NA
LOC18033168	(3S,6E)-nerolidol synthase 1	-4.39808	0.33346	5.1385e-31	8.10433e-30	K14175	[EC:4.2.3.48]	cic00909	078
LOC18033641	abscisic acid 8'-hydroxylase 4	-4.39719	0.280989	9.50451e-43	2.20672e-41	K09843	[EC:1.14.14.137]	cic00906	076
LOC18044207	phosphoinositide phospholipase C 6	4.39666	0.212247	4.40238e-73	2.1702e-71	K05857	[EC:3.1.4.11]	cic00562;cic04070	048;108
LOC112097983	putative disease resistance protein RGA3	-4.39598	0.998314	2.03161e-05	8.36572e-05	NA	NA	NA	NA
LOC18055310	trihelix transcription factor GT-2	-4.39595	0.159516	6.43941e-127	8.37244e-125	NA	NA	NA	NA
LOC18035667	uncharacterized LOC18035667	4.39516	1.79525	0.00242757	0.00786495	NA	NA	NA	NA
LOC18032327	uncharacterized LOC18032327	-4.39452	1.28107	0.00035175	0.00126622	NA	NA	NA	NA
LOC18054400	receptor-like serine/threonine-protein kinase SD1-8	4.39432	0.192467	6.15251e-88	3.98725e-86	NA	NA	NA	NA
LOC18032596	probable glutathione S-transferase	4.39312	0.250913	7.57925e-53	2.28178e-51	K00799	[EC:2.5.1.18]	cic00480	041
LOC112098369	(R)-limonene synthase 1, chloroplastic	4.39046	1.11636	0.0002172	0.000802417	NA	NA	NA	NA
LOC18054912	probable disease resistance protein At1g61190	-4.39014	0.338963	7.55173e-30	1.15006e-28	NA	NA	NA	NA
LOC18055484	putative GATA transcription factor 22	-4.38772	0.406415	3.32204e-21	3.5715e-20	NA	NA	NA	NA
LOC18037660	cinnamoyl-CoA reductase 1	-4.38613	0.480466	1.32055e-15	1.08325e-14	K09753	[EC:1.2.1.44]	cic00940	081
LOC18037348	nitrate regulatory gene2 protein	-4.38443	0.244841	8.98415e-55	2.87092e-53	NA	NA	NA	NA
LOC112098165	sugar transporter ERD6-like 5	-4.3844	3.09911	0.00914006	0.0273741	NA	NA	NA	NA
LOC18038601	uncharacterized LOC18038601	-4.38301	0.316713	3.34182e-34	5.86666e-33	NA	NA	NA	NA
LOC18045628	uncharacterized LOC18045628	-4.38066	0.417948	4.46054e-20	4.53975e-19	NA	NA	NA	NA
LOC18034906	phenylalanine ammonia-lyase	-4.37904	0.539583	8.84045e-13	6.15076e-12	K10775	[EC:4.3.1.24]	cic00360;cic00940	032;081
LOC18042995	F-box protein PP2-B15	4.37428	0.681412	6.78176e-09	3.70681e-08	NA	NA	NA	NA
LOC112099086	uncharacterized LOC112099086	4.37127	1.95865	0.00401582	0.0126734	NA	NA	NA	NA
LOC18055587	cell wall / vacuolar inhibitor of fructosidase 2	-4.37028	3.16366	0.00985363	0.0293843	NA	NA	NA	NA
LOC18046743	probable fructokinase-5	-4.36943	0.693825	2.05069e-08	1.08579e-07	K00847	[EC:2.7.1.4]	cic00051;cic00500;cic00520	005;042;045
LOC18052648	clathrin light chain 2	4.36942	0.734486	3.31819e-08	1.72528e-07	NA	NA	NA	NA
LOC18042867	alcohol dehydrogenase-like 2	-4.36728	0.266592	2.08788e-46	5.38886e-45	K00121	[EC:1.1.1.284 1.1.1.1]	cic00010;cic00071;cic00350;cic00620	001;010;031;057
LOC18048502	glucan endo-1,3-beta-glucosidase 13	-4.36689	0.709935	3.48828e-08	1.81145e-07	NA	NA	NA	NA
LOC18055640	auxin-responsive protein IAA33	4.3667	0.971136	2.87694e-05	0.000116619	NA	NA	NA	NA
LOC18054316	cyclic nucleotide-gated ion channel 4	-4.36657	0.129947	3.43853e-187	9.79887e-185	K05391	NA	cic04626	116
LOC112098766	U1 spliceosomal RNA	4.36562	3.22172	0.0109496	0.0324204	NA	NA	NA	NA
LOC112099240	uncharacterized LOC112099240	-4.36366	1.05008	7.55665e-05	0.000293176	NA	NA	NA	NA
LOC18049190	UDP-glycosyltransferase 83A1	-4.36316	2.39619	0.0028858	0.00927154	NA	NA	NA	NA
LOC18054348	uncharacterized LOC18054348	4.35547	0.256722	1.19062e-49	3.34709e-48	NA	NA	NA	NA
LOC18048368	caffeic acid 3-O-methyltransferase	4.35352	1.05714	5.4934e-05	0.000216152	K13066	[EC:2.1.1.68 2.1.1.4]	cic00380;cic00940	033;081
LOC18049234	transcription factor bHLH57	-4.35281	0.110278	3.90342e-257	2.38832e-254	NA	NA	NA	NA
LOC18041918	formin-like protein 11	-4.35239	0.893946	1.0824e-05	4.56645e-05	NA	NA	NA	NA
LOC18041553	nicotianamine synthase	-4.35135	0.392064	1.19258e-22	1.38754e-21	K05953	[EC:2.5.1.43]	cic00270;cic00999	024;091
LOC18053887	elongator complex protein 4	-4.35	0.223098	1.74505e-64	7.26044e-63	K11375	NA	NA	NA
LOC18044327	uncharacterized LOC18044327	-4.34891	0.210864	2.76559e-72	1.34737e-70	NA	NA	NA	NA
LOC18032943	epoxide hydrolase A	4.34666	0.857049	2.32071e-06	1.04724e-05	NA	NA	NA	NA
LOC18034587	branched-chain-amino-acid aminotransferase 2, chloroplastic	-4.34363	0.188395	4.53047e-89	2.97311e-87	K00826	[EC:2.6.1.42]	cic00270;cic00280;cic00290;cic00770	024;025;026;068
LOC18043512	protein HOTHEAD	-4.34362	0.359191	2.89682e-26	3.87292e-25	NA	NA	NA	NA
LOC18035825	zinc finger protein 1	-4.33733	0.635152	5.88079e-10	3.4384e-09	NA	NA	NA	NA
LOC18035580	fatty acyl-CoA reductase 3	4.33611	0.984485	9.51223e-05	0.000365367	NA	NA	NA	NA
LOC18041214	LOB domain-containing protein 15	4.33565	0.876448	3.71409e-06	1.64182e-05	NA	NA	NA	NA
LOC18055361	uncharacterized LOC18055361	4.33463	0.298454	3.88026e-37	7.46726e-36	NA	NA	NA	NA
LOC18047155	leucoanthocyanidin dioxygenase	4.33258	0.222497	2.10838e-64	8.73716e-63	K05277	[EC:1.14.20.4]	cic00941	082
LOC18051306	protein trichome birefringence-like 36	-4.33156	0.234102	2.69735e-58	9.49457e-57	NA	NA	NA	NA
LOC18036910	uncharacterized LOC18036910	-4.331	0.154717	1.62651e-130	2.27089e-128	NA	NA	NA	NA
LOC18049815	probable WRKY transcription factor 47	4.32887	0.21268	1.99912e-70	9.4303e-69	NA	NA	NA	NA
LOC18041937	lysosomal alpha-glucosidase	-4.32847	0.131002	7.78473e-181	2.04995e-178	NA	NA	NA	NA
LOC18048385	uncharacterized LOC18048385	-4.32488	0.183482	3.98783e-93	2.83136e-91	NA	NA	NA	NA
LOC18041997	uncharacterized LOC18041997	4.3248	0.194574	2.11739e-83	1.25137e-81	NA	NA	NA	NA
LOC18035828	receptor-like protein 9DC3	4.32325	1.03085	7.42794e-05	0.000288451	NA	NA	NA	NA
LOC18045100	protein NEOXANTHIN-DEFICIENT 1	-4.32034	0.365121	3.16926e-25	4.09249e-24	NA	NA	NA	NA
LOC18039218	F-box/LRR-repeat protein At4g14103	-4.31927	0.523999	4.04804e-13	2.87509e-12	NA	NA	NA	NA
LOC18031499	GDSL esterase/lipase At4g16230	-4.31635	0.128472	9.20073e-187	2.58652e-184	NA	NA	NA	NA
LOC18035576	G2/mitotic-specific cyclin-2	4.31177	0.959803	8.22111e-05	0.000317534	K21777	NA	NA	NA
LOC18034369	uncharacterized LOC18034369	-4.30493	0.127708	1.41327e-188	4.20003e-186	NA	NA	NA	NA
LOC18052351	amino-acid permease BAT1	4.30467	0.609913	1.45101e-10	8.82353e-10	NA	NA	NA	NA
LOC18055993	plasma membrane ATPase 4	4.30447	0.102561	1.05793e-289	9.56876e-287	K01535	[EC:7.1.2.1]	cic00190	014
LOC18052663	endonuclease 4	-4.30424	0.374273	9.67168e-24	1.18075e-22	K05986	[EC:3.1.30.1]	NA	NA
LOC18035170	serine carboxypeptidase-like 51	-4.3027	0.579578	5.63791e-11	3.52738e-10	K09646	[EC:3.4.16.-]	NA	NA
LOC18047049	rho GTPase-activating protein 3	-4.30222	0.267583	1.19872e-44	2.94069e-43	NA	NA	NA	NA
LOC18045042	GDSL esterase/lipase At2g42990	-4.29969	0.238646	2.11284e-55	6.83567e-54	NA	NA	NA	NA
LOC18055189	cellulose synthase-like protein E6	-4.29938	2.63572	0.00593337	0.0182673	NA	NA	NA	NA
LOC18037507	caffeoyl-CoA O-methyltransferase 5	4.2986	0.288193	5.91735e-39	1.21279e-37	K00588	[EC:2.1.1.104]	cic00940;cic00941;cic00945	081;082;086
LOC18037128	transcription repressor OFP7	-4.29835	2.54574	0.00499955	0.0155627	NA	NA	NA	NA
LOC18045062	protein IQ-DOMAIN 14	-4.29621	0.436254	7.64525e-18	7.04983e-17	NA	NA	NA	NA
LOC18047814	uncharacterized LOC18047814	-4.29183	0.294803	4.83475e-37	9.26979e-36	NA	NA	NA	NA
LOC112100191	disease resistance-like protein DSC1	4.29076	0.462902	3.19463e-16	2.70815e-15	NA	NA	NA	NA
LOC18053376	flavonoid 3'-monooxygenase	4.28972	0.323648	2.48331e-31	3.96167e-30	NA	NA	NA	NA
LOC18048042	probable pectinesterase/pectinesterase inhibitor 36	4.28935	1.21922	0.00035247	0.00126837	K01051	[EC:3.1.1.11]	cic00040	004
LOC18053889	ABC transporter G family member 10	4.28787	1.45794	0.00160234	0.00532143	NA	NA	NA	NA
LOC18052330	uncharacterized LOC18052330	-4.28761	0.458288	3.14209e-16	2.6647e-15	NA	NA	NA	NA
LOC18054965	protein BIG GRAIN 1-like C	4.28714	0.438476	5.93601e-18	5.50543e-17	NA	NA	NA	NA
LOC18049378	putative disease resistance RPP13-like protein 1	-4.28325	0.946196	3.12394e-05	0.000126213	NA	NA	NA	NA
LOC18048788	transcription factor GLABRA 3	-4.28257	0.387163	3.24497e-22	3.70297e-21	NA	NA	NA	NA
LOC18052561	uncharacterized LOC18052561	-4.28022	1.02185	0.000160849	0.000602365	NA	NA	NA	NA
LOC112095894	H/ACA ribonucleoprotein complex non-core subunit NAF1	-4.27937	2.81607	0.00801743	0.0242141	NA	NA	NA	NA
LOC18044271	polygalacturonase inhibitor	4.27846	0.190936	1.80302e-84	1.09035e-82	NA	NA	NA	NA
LOC18039909	glutathione S-transferase U8	4.27192	0.83066	1.96095e-06	8.90107e-06	K00799	[EC:2.5.1.18]	cic00480	041
LOC18035703	uncharacterized LOC18035703	-4.27164	0.739786	1.08606e-07	5.43631e-07	NA	NA	NA	NA
LOC18045106	probable 2-oxoglutarate-dependent dioxygenase At5g05600	4.27054	0.277255	3.43977e-41	7.63687e-40	NA	NA	NA	NA
LOC18047002	auxin-responsive protein IAA20	-4.26864	0.555037	9.5722e-12	6.28966e-11	K14484	NA	cic04075	109
LOC18056102	60S ribosomal protein L14-1	4.26846	1.06775	0.000101245	0.000387811	K02875	NA	NA	NA
LOC18048282	protein LURP-one-related 4	-4.26697	2.5808	0.0055514	0.0171522	NA	NA	NA	NA
LOC18041830	uncharacterized LOC18041830	4.2656	0.908508	9.70608e-06	4.11653e-05	NA	NA	NA	NA
LOC18047695	21 kDa protein	-4.26429	1.25896	0.000443239	0.00157242	NA	NA	NA	NA
LOC112095738	aspartic proteinase CDR1-like	4.26355	0.384202	1.44546e-22	1.67241e-21	NA	NA	NA	NA
LOC18035126	protein PELPK1	-4.2617	0.661514	1.05073e-08	5.67011e-08	NA	NA	NA	NA
LOC112098304	protein BONZAI 3-like	-4.2587	1.06993	0.000227378	0.000838529	NA	NA	NA	NA
LOC18039473	uncharacterized LOC18039473	-4.25861	1.47113	0.00118563	0.00400402	NA	NA	NA	NA
LOC18044755	cytosolic endo-beta-N-acetylglucosaminidase 1	-4.25801	0.175388	3.10668e-98	2.46672e-96	K01227	[EC:3.2.1.96]	NA	NA
LOC18043500	piriformospora indica-insensitive protein 2	-4.25538	0.735772	2.14227e-07	1.05033e-06	NA	NA	NA	NA
LOC112098251	putative disease resistance protein RGA3	4.25446	0.230108	4.28066e-58	1.49163e-56	NA	NA	NA	NA
LOC18033220	probable trehalose-phosphate phosphatase C	4.25161	0.464107	3.38129e-16	2.85939e-15	K01087	[EC:3.1.3.12]	cic00500	042
LOC18031181	geraniol 8-hydroxylase	4.25023	0.742988	1.04922e-07	5.25952e-07	NA	NA	NA	NA
LOC18043741	acyl-CoA--sterol O-acyltransferase 1	-4.24997	0.479489	6.00067e-15	4.75188e-14	NA	NA	NA	NA
LOC18038159	uncharacterized LOC18038159	-4.24788	1.97467	0.000778479	0.00268747	NA	NA	NA	NA
LOC18042394	UDP-glucose 4-epimerase GEPI48	-4.24775	0.177136	4.29631e-96	3.21497e-94	K01784	[EC:5.1.3.2]	cic00052;cic00520	006;045
LOC18045567	probable DNA primase large subunit	-4.24699	0.223786	7.62166e-61	2.87234e-59	K02685	NA	cic03030	099
LOC18036032	probable disease resistance protein At5g63020	-4.2437	0.275623	1.27893e-40	2.77141e-39	NA	NA	NA	NA
LOC112098481	chaperonin CPN60-1, mitochondrial-like	4.24346	0.579874	4.83092e-11	3.03618e-10	NA	NA	NA	NA
LOC18046571	uncharacterized LOC18046571	4.23852	0.137607	2.11268e-156	4.3515e-154	NA	NA	NA	NA
LOC112097734	putrescine-binding periplasmic protein-like	-4.23799	0.689166	4.89604e-08	2.51363e-07	NA	NA	NA	NA
LOC18043549	uncharacterized LOC18043549	4.2378	0.202417	7.73406e-74	3.84908e-72	NA	NA	NA	NA
LOC18034041	uncharacterized LOC18034041	-4.23524	0.294104	4.88372e-36	9.03879e-35	NA	NA	NA	NA
LOC18042862	disease resistance protein At4g27190	4.23361	1.84905	0.00372647	0.0118209	NA	NA	NA	NA
LOC18044785	BTB/POZ domain-containing protein At5g03250	-4.23056	2.46183	0.00449559	0.0140952	NA	NA	NA	NA
LOC18032104	alpha carbonic anhydrase 4	4.23034	0.675419	8.78253e-09	4.76658e-08	K01674	[EC:4.2.1.1]	cic00910	079
LOC18049009	dof zinc finger protein DOF2.5	-4.22834	0.755664	6.50068e-07	3.07629e-06	NA	NA	NA	NA
LOC18042546	uncharacterized LOC18042546	-4.22699	0.357341	6.10959e-25	7.83586e-24	NA	NA	NA	NA
LOC18034655	endochitinase	-4.22505	0.286356	4.74849e-38	9.48923e-37	K20547	[EC:3.2.1.14]	cic00520;cic04016	045;107
LOC112098322	uncharacterized LOC112098322	-4.22311	0.274956	1.75121e-40	3.77127e-39	NA	NA	NA	NA
LOC18048480	serine/threonine-protein kinase Aurora-3	-4.22304	0.228181	7.29549e-58	2.51688e-56	K08850	[EC:2.7.11.1]	NA	NA
LOC18044027	transcription factor bHLH30	-4.22033	0.930231	3.29775e-05	0.000132694	NA	NA	NA	NA
LOC18045526	BTB/POZ domain and ankyrin repeat-containing protein NPR2	-4.21921	0.775823	1.22785e-06	5.68728e-06	NA	NA	NA	NA
LOC18046096	uncharacterized LOC18046096	-4.21852	0.530301	3.00844e-12	2.03395e-11	NA	NA	NA	NA
LOC18033172	uncharacterized LOC18033172	-4.21845	0.264456	1.32611e-43	3.14563e-42	NA	NA	NA	NA
LOC18050327	uncharacterized LOC18050327	-4.21782	0.957833	0.000113742	0.000433605	NA	NA	NA	NA
LOC18037831	ethylene-responsive transcription factor WIN1	-4.2136	2.41333	0.00403821	0.0127418	NA	NA	NA	NA
LOC112100268	peroxidase 3-like	-4.21213	0.0879905	0	0	NA	NA	NA	NA
LOC18046199	protein DETOXIFICATION 14	4.21134	0.398092	9.072e-21	9.53156e-20	K03327	NA	NA	NA
LOC18049638	probable serine/threonine-protein kinase At1g54610	-4.20946	0.463732	1.72077e-15	1.40381e-14	NA	NA	NA	NA
LOC112100061	TMV resistance protein N-like	-4.20791	0.246628	1.29215e-49	3.62761e-48	NA	NA	NA	NA
LOC18053240	aquaporin NIP1-2	4.2079	0.318238	9.99078e-31	1.56505e-29	K09874	NA	NA	NA
LOC18045175	leucine-rich repeat protein 1	-4.20522	0.125056	3.02335e-185	8.38597e-183	NA	NA	NA	NA
LOC18031642	protein GAST1	-4.20201	0.171266	7.46715e-100	6.13988e-98	NA	NA	NA	NA
LOC112101004	heavy metal-associated isoprenylated plant protein 47-like	4.19977	1.82378	0.00379088	0.0120179	NA	NA	NA	NA
LOC18035406	receptor-like serine/threonine-protein kinase NCRK	4.19934	0.287682	4.20709e-37	8.08873e-36	NA	NA	NA	NA
LOC18043062	glutathione S-transferase L3	4.19865	0.801002	7.71724e-07	3.63381e-06	K00799	[EC:2.5.1.18]	cic00480	041
LOC18043463	uncharacterized LOC18043463	-4.1977	0.334477	8.46859e-28	1.2009e-26	NA	NA	NA	NA
LOC18040924	uncharacterized LOC18040924	4.19706	0.28386	5.65381e-38	1.12122e-36	NA	NA	NA	NA
LOC18054060	pleiotropic drug resistance protein 1	-4.1968	0.399362	2.97297e-20	3.04964e-19	NA	NA	NA	NA
LOC18039900	uncharacterized LOC18039900	-4.19559	1.37778	0.00100519	0.0034213	NA	NA	NA	NA
LOC18049277	NAC transcription factor 47	4.19461	0.169198	4.86378e-102	4.11306e-100	NA	NA	NA	NA
LOC18032464	berberine bridge enzyme-like 13	-4.19437	1.07382	0.000317848	0.00115015	K22395	[EC:1.1.1.195]	cic00940	081
LOC112098921	protein FAR-RED IMPAIRED RESPONSE 1-like	-4.19411	1.33512	0.000819315	0.00282049	NA	NA	NA	NA
LOC18042910	homeobox-leucine zipper protein HAT9	-4.19344	1.37999	0.00101536	0.00345478	K09338	NA	NA	NA
LOC18032844	probable glutathione S-transferase	4.18634	0.108968	3.85262e-241	2.22628e-238	K00799	[EC:2.5.1.18]	cic00480	041
LOC18054539	uncharacterized LOC18054539	4.18464	0.119344	2.63791e-201	9.14608e-199	NA	NA	NA	NA
LOC112097927	putative disease resistance protein RGA1	4.18355	1.47888	0.00144981	0.00484739	NA	NA	NA	NA
LOC18045379	heat shock cognate 70 kDa protein	4.17703	0.102484	4.63877e-271	3.3276e-268	K03283	NA	cic04141;cic04144	112;113
LOC18039654	protein STRUBBELIG-RECEPTOR FAMILY 2	-4.17429	1.42549	0.00120592	0.0040674	NA	NA	NA	NA
LOC18035959	probable disease resistance protein At5g63020	-4.1717	2.30204	0.00305324	0.00976726	NA	NA	NA	NA
LOC18039519	CRIB domain-containing protein RIC4	-4.16968	2.58239	0.0064905	0.0198825	NA	NA	NA	NA
LOC18039917	glutathione S-transferase F12	-4.16788	2.38541	0.00410463	0.0129396	K00799	[EC:2.5.1.18]	cic00480	041
LOC112095686	uncharacterized LOC112095686	-4.16751	2.4064	0.0043292	0.0136105	NA	NA	NA	NA
LOC18055683	uncharacterized LOC18055683	-4.16293	0.361993	1.22474e-23	1.48822e-22	K10418	NA	NA	NA
LOC112099416	small nucleolar RNA U3	-4.16126	2.77406	0.00867748	0.0260677	NA	NA	NA	NA
LOC18053227	protein GRAVITROPIC IN THE LIGHT 1	-4.16052	0.598414	9.70557e-10	5.6038e-09	NA	NA	NA	NA
LOC18041650	uncharacterized LOC18041650	-4.16019	0.519353	2.30894e-12	1.57073e-11	NA	NA	NA	NA
LOC18047263	carbonic anhydrase 2	-4.15763	0.287435	4.3859e-36	8.1319e-35	K01673	[EC:4.2.1.1]	cic00910	079
LOC112096846	uncharacterized LOC112096846	4.15726	1.46942	0.00151749	0.00505578	NA	NA	NA	NA
LOC18036412	auxin-induced protein AUX22	-4.15358	1.09169	0.000365473	0.00131311	K14484	NA	cic04075	109
LOC18039758	abscisic acid 8'-hydroxylase 1	4.1534	0.180101	1.12653e-88	7.34644e-87	K09843	[EC:1.14.14.137]	cic00906	076
LOC18056024	uncharacterized LOC18056024	4.15188	0.280506	5.21514e-38	1.0362e-36	NA	NA	NA	NA
LOC112098871	uncharacterized LOC112098871	-4.14989	0.318982	1.85426e-29	2.79726e-28	NA	NA	NA	NA
LOC112098177	putative disease resistance RPP13-like protein 1	4.14981	0.328214	4.11765e-28	5.89535e-27	NA	NA	NA	NA
LOC18039274	GDSL esterase/lipase At5g03610	-4.14924	0.158805	1.0927e-112	1.10885e-110	NA	NA	NA	NA
LOC18052289	TPR repeat-containing protein ZIP4	-4.14923	0.222423	3.36379e-58	1.18005e-56	NA	NA	NA	NA
LOC18048517	serine/threonine-protein phosphatase 2A 65 kDa regulatory subunit A beta isoform	4.14759	0.559055	1.10527e-10	6.77857e-10	NA	NA	NA	NA
LOC18054894	rhomboid-like protein 11, chloroplastic	-4.14474	2.45696	0.00513889	0.015963	NA	NA	NA	NA
LOC18045604	uncharacterized LOC18045604	4.14459	1.31673	0.00138298	0.00463587	NA	NA	NA	NA
LOC18053065	glutathione S-transferase T3	-4.13799	2.65386	0.00763825	0.0231394	NA	NA	NA	NA
LOC18055652	uncharacterized LOC18055652	-4.13698	0.298816	4.85497e-33	8.21122e-32	NA	NA	NA	NA
LOC18048646	cytochrome P450 86A22	4.13627	0.146217	1.60331e-131	2.28449e-129	K15398	[EC:1.14.-.-]	cic00073	011
LOC112098510	shikimate O-hydroxycinnamoyltransferase-like	-4.136	0.241622	1.16015e-49	3.26585e-48	NA	NA	NA	NA
LOC18040222	polcalcin Che a 3	4.13491	2.11921	0.00215483	0.00702728	NA	NA	NA	NA
LOC18047745	uncharacterized LOC18047745	4.13265	0.385381	4.0837e-21	4.37452e-20	NA	NA	NA	NA
LOC18055552	guanine nucleotide-binding protein subunit gamma 3	-4.13263	0.439344	2.65275e-16	2.25798e-15	K24773	NA	NA	NA
LOC112098286	uncharacterized LOC112098286	4.12948	0.782871	9.79197e-07	4.57039e-06	NA	NA	NA	NA
LOC18041938	ubiquinol oxidase 3, mitochondrial	4.1282	0.985665	5.52037e-05	0.000217171	K17893	[EC:1.10.3.11]	NA	NA
LOC18048325	phytolongin Phyl2.2	-4.12643	0.335807	1.12819e-26	1.52996e-25	NA	NA	NA	NA
LOC18047427	protein NRT1/ PTR FAMILY 6.3	-4.12575	2.35786	0.00401592	0.0126734	NA	NA	NA	NA
LOC18051007	S-type anion channel SLAH1	4.12373	0.360378	1.59318e-23	1.92579e-22	NA	NA	NA	NA
LOC18042338	putative pumilio homolog 7, chloroplastic	-4.12354	0.238809	1.81736e-50	5.22189e-49	NA	NA	NA	NA
LOC18048824	RNA-binding protein 24-B	-4.12197	0.461167	4.61465e-15	3.67951e-14	NA	NA	NA	NA
LOC18040169	snakin-2	4.12182	0.368572	9.53347e-23	1.11169e-21	NA	NA	NA	NA
LOC18036204	dof zinc finger protein DOF3.4	-4.12077	0.189153	1.72142e-78	9.49883e-77	NA	NA	NA	NA
LOC18034300	uncharacterized protein At3g50808	-4.12022	2.464	0.00543151	0.0168092	NA	NA	NA	NA
LOC112100930	uncharacterized LOC112100930	-4.11837	0.64895	1.54535e-08	8.26001e-08	NA	NA	NA	NA
LOC18048729	tetrapyrrole-binding protein, chloroplastic	-4.11681	0.310733	1.11569e-30	1.74641e-29	NA	NA	NA	NA
LOC18054824	probable receptor-like protein kinase At5g20050	-4.11609	0.680712	9.77657e-08	4.90905e-07	NA	NA	NA	NA
LOC18044681	glutathione S-transferase F9	-4.11605	0.177282	4.59733e-89	3.00749e-87	K00799	[EC:2.5.1.18]	cic00480	041
LOC18033214	carboxylesterase 1	-4.11592	0.394091	1.06579e-19	1.06492e-18	NA	NA	NA	NA
LOC18043428	wall-associated receptor kinase-like 20	4.1147	0.198709	1.66839e-71	8.01562e-70	NA	NA	NA	NA
LOC18049878	uncharacterized LOC18049878	-4.11316	0.577626	1.71568e-10	1.03875e-09	NA	NA	NA	NA
LOC18049202	uncharacterized protein At5g39865	-4.11184	0.41382	4.15847e-18	3.89678e-17	K17479	NA	NA	NA
LOC18039176	36.4 kDa proline-rich protein	4.10942	0.319588	3.84361e-29	5.7195e-28	NA	NA	NA	NA
LOC18031224	uncharacterized LOC18031224	-4.10493	0.239166	1.53817e-49	4.30667e-48	NA	NA	NA	NA
LOC18043305	serine carboxypeptidase-like 27	-4.1043	0.67285	5.18726e-08	2.65397e-07	K16297	[EC:3.4.16.-]	NA	NA
LOC18037691	transcription factor bHLH25	4.10387	1.9004	0.00487496	0.0152022	NA	NA	NA	NA
LOC18046088	aldehyde dehydrogenase family 2 member B4, mitochondrial	-4.10372	0.249287	2.10811e-46	5.43433e-45	K00128	[EC:1.2.1.3]	cic00010;cic00053;cic00071;cic00280;cic00310;cic00330;cic00340;cic00380;cic00410;cic00561;cic00620;cic00770;cic00903	001;007;010;025;028;029;030;033;035;047;057;068;073
LOC18031300	zeatin O-glucosyltransferase	-4.10311	1.07123	0.000373206	0.00133812	K13495	[EC:2.4.1.215]	cic00908	077
LOC112100012	proline-rich receptor-like protein kinase PERK2	4.10193	0.527673	5.23335e-12	3.49276e-11	NA	NA	NA	NA
LOC112096167	probable polyamine transporter At1g31830	4.10145	0.248139	1.28841e-46	3.35455e-45	NA	NA	NA	NA
LOC18046963	GEM-like protein 2	4.10114	0.340909	8.38646e-26	1.1028e-24	NA	NA	NA	NA
LOC18037528	G-type lectin S-receptor-like serine/threonine-protein kinase At5g35370	4.10036	0.338497	3.9681e-26	5.27803e-25	NA	NA	NA	NA
LOC18044316	protein DETOXIFICATION 24	-4.09875	0.213137	7.48523e-62	2.91056e-60	NA	NA	NA	NA
LOC18048932	probable ADP-ribosylation factor GTPase-activating protein AGD15	-4.09207	0.755614	8.77751e-07	4.10795e-06	NA	NA	NA	NA
LOC18054346	glucan endo-1,3-beta-glucosidase 12	-4.0903	0.169212	2.03059e-96	1.53608e-94	NA	NA	NA	NA
LOC112098113	receptor-like protein kinase 2	4.0856	2.62238	0.00800457	0.0241861	NA	NA	NA	NA
LOC18044268	cytochrome P450 85A1	-4.08413	0.359764	2.59139e-23	3.10534e-22	K09590	[EC:1.14.-.-]	cic00905	075
LOC18050662	uncharacterized LOC18050662	4.08132	0.391549	6.4032e-20	6.47573e-19	NA	NA	NA	NA
LOC18048703	expansin-like B1	-4.07938	3.26916	0.0128049	0.0374551	NA	NA	NA	NA
LOC18044620	ankyrin-3	-4.06618	2.62433	0.00793215	0.0239914	NA	NA	NA	NA
LOC18036894	HVA22-like protein k	-4.06517	0.257722	2.88889e-42	6.6114e-41	K17279	NA	NA	NA
LOC18042286	PHD finger protein ALFIN-LIKE 7	-4.06261	0.175859	9.87172e-88	6.35794e-86	NA	NA	NA	NA
LOC18033881	putative zinc finger protein CONSTANS-LIKE 11	-4.06182	2.6249	0.00821853	0.0247639	NA	NA	NA	NA
LOC18041139	high mobility group B protein 9	-4.06164	0.260091	1.36708e-41	3.08454e-40	NA	NA	NA	NA
LOC18048241	uncharacterized LOC18048241	-4.05981	0.280667	5.15541e-36	9.52469e-35	K11985	[EC:2.3.2.27]	NA	NA
LOC18033130	chalcone synthase 1	-4.05555	0.39795	8.96077e-19	8.63813e-18	K00660	[EC:2.3.1.74]	cic00941;cic00960;cic04712	082;088;117
LOC112100207	cyclic nucleotide-gated ion channel 1-like	-4.05092	1.3151	0.00105862	0.00359728	NA	NA	NA	NA
LOC18036906	late embryogenesis abundant protein D-7	-4.05004	2.70189	0.00904964	0.0271232	NA	NA	NA	NA
LOC18044224	protein ASPARTIC PROTEASE IN GUARD CELL 2	-4.04996	0.281144	1.7485e-35	3.1879e-34	NA	NA	NA	NA
LOC112098436	2-hydroxyisoflavanone dehydratase-like	4.04406	0.486179	1.39231e-13	1.01487e-12	NA	NA	NA	NA
LOC18035584	beta-glucosidase BoGH3B	-4.04282	2.67422	0.0088234	0.0264867	K01188	[EC:3.2.1.21]	cic00460;cic00500;cic00999	039;042;091
LOC18052598	photosystem I reaction center subunit psaK, chloroplastic	-4.04251	0.188769	7.16987e-76	3.76654e-74	K02698	NA	cic00195	015
LOC18051487	hyccin	-4.04224	2.423	0.00564885	0.01743	K21844	NA	NA	NA
LOC18036840	codeine O-demethylase	4.03936	0.166377	9.77854e-97	7.47878e-95	NA	NA	NA	NA
LOC18045908	O-glucosyltransferase rumi	4.03652	0.146649	2.23132e-123	2.69873e-121	NA	NA	NA	NA
LOC18050520	clathrin coat assembly protein AP180	-4.03541	2.40583	0.00546708	0.0169085	NA	NA	NA	NA
LOC18038198	zinc-finger homeodomain protein 9	-4.03506	0.133223	3.40326e-149	6.32125e-147	NA	NA	NA	NA
LOC18049786	oligopeptide transporter 1	-4.03401	2.66102	0.008587	0.0258143	NA	NA	NA	NA
LOC18049771	probable LRR receptor-like serine/threonine-protein kinase At5g48740	-4.03045	0.369767	3.00247e-21	3.23462e-20	NA	NA	NA	NA
LOC18042222	40S ribosomal protein S8	-4.02613	0.427498	2.50497e-16	2.13482e-15	NA	NA	NA	NA
LOC18053265	major pollen allergen Ole e 10	-4.02563	3.16591	0.0130757	0.0381877	NA	NA	NA	NA
LOC18055350	EG45-like domain containing protein 2	-4.02184	2.58633	0.00806318	0.0243381	NA	NA	NA	NA
LOC18054542	probable sarcosine oxidase	-4.02025	0.218127	1.71683e-56	5.75125e-55	K00306	[EC:1.5.3.1 1.5.3.7]	cic00260;cic00310;cic04146	022;028;115
LOC18045977	small heat shock protein, chloroplastic	4.0198	0.4366	4.44545e-16	3.73652e-15	K13993	NA	cic04141	112
LOC18032632	endoglucanase 8	-4.01373	3.01902	0.012177	0.0357591	K01179	[EC:3.2.1.4]	cic00500	042
LOC18043488	alpha-galactosidase	-4.0131	2.90213	0.0114209	0.0337534	NA	NA	NA	NA
LOC18054689	G-type lectin S-receptor-like serine/threonine-protein kinase At4g27290	4.00919	2.98651	0.0118968	0.0350155	NA	NA	NA	NA
LOC18036482	patatin-like protein 5	4.0086	0.289515	2.39835e-33	4.08623e-32	NA	NA	NA	NA
LOC112095813	proteasome subunit alpha type-5-like	4.00689	0.25331	2.41627e-42	5.54808e-41	NA	NA	NA	NA
LOC18034799	transcription factor FER-LIKE IRON DEFICIENCY-INDUCED TRANSCRIPTION FACTOR	4.00657	0.659604	3.95102e-08	2.04461e-07	NA	NA	NA	NA
LOC18044121	protein NRT1/ PTR FAMILY 5.1	4.00491	2.88341	0.0114446	0.0338088	NA	NA	NA	NA
LOC18050409	uncharacterized LOC18050409	-4.00351	0.533994	5.013e-11	3.14777e-10	NA	NA	NA	NA
LOC18054021	homeobox-leucine zipper protein ATHB-52	4.00286	2.77653	0.00992984	0.0295988	NA	NA	NA	NA
LOC18034456	cyclin-D3-1	-4.00068	0.187202	1.54158e-75	8.03749e-74	K14505	NA	cic04075	109
LOC18038855	uncharacterized LOC18038855	-4.00004	0.353342	1.43522e-22	1.66148e-21	NA	NA	NA	NA
LOC18049711	probable methyltransferase PMT19	-3.99968	0.218213	6.8377e-56	2.24715e-54	NA	NA	NA	NA
LOC18048398	protein LONGIFOLIA 1	-3.99958	0.12112	1.11696e-176	2.83368e-174	NA	NA	NA	NA
LOC18049891	uncharacterized LOC18049891	-3.99528	1.09159	0.000652407	0.00227604	NA	NA	NA	NA
LOC18056126	double-stranded RNA-binding protein 4	3.99419	0.468073	6.56581e-14	4.88689e-13	NA	NA	NA	NA
LOC18044937	tetratricopeptide repeat protein 27 homolog	3.99348	0.253063	2.52025e-42	5.78045e-41	NA	NA	NA	NA
LOC18041910	RING-H2 finger protein ATL54	-3.99257	0.752581	1.78431e-06	8.13832e-06	NA	NA	NA	NA
LOC18051916	uncharacterized LOC18051916	-3.99069	2.20899	0.00316345	0.0101027	NA	NA	NA	NA
LOC18038265	histone H2B	-3.9895	0.186388	1.75414e-75	9.12284e-74	K11252	NA	NA	NA
LOC18052162	protein TRANSPORT INHIBITOR RESPONSE 1	-3.98904	0.566425	9.08166e-10	5.25524e-09	K14485	NA	cic04075	109
LOC18054031	ribosomal protein L11 methyltransferase	-3.98606	0.298456	8.96708e-31	1.40574e-29	NA	NA	NA	NA
LOC18038644	GDSL esterase/lipase At5g03810	-3.98498	0.836719	9.9907e-06	4.22948e-05	NA	NA	NA	NA
LOC18044066	methylesterase 1	3.98308	0.276381	6.24583e-36	1.1529e-34	NA	NA	NA	NA
LOC18037502	probable xyloglucan endotransglucosylase/hydrolase protein 6	3.98223	0.168276	1.47618e-91	1.01685e-89	K08235	[EC:2.4.1.207]	NA	NA
LOC18052152	DNA (cytosine-5)-methyltransferase CMT3	-3.97876	0.16769	6.73445e-92	4.66989e-90	K00558	[EC:2.1.1.37]	cic00270	024
LOC18041060	uncharacterized LOC18041060	3.97846	0.549475	9.64256e-11	5.94353e-10	NA	NA	NA	NA
LOC18044288	protein NUCLEAR FUSION DEFECTIVE 4	-3.97523	0.889546	5.59604e-05	0.000219857	NA	NA	NA	NA
LOC18051288	transcription factor bHLH167	3.97487	2.12679	0.00809891	0.0244318	NA	NA	NA	NA
LOC18043190	beta-amyrin synthase	3.97229	0.720951	3.77248e-07	1.81538e-06	NA	NA	NA	NA
LOC18055135	uncharacterized LOC18055135	-3.97189	0.573553	9.15143e-10	5.29414e-09	NA	NA	NA	NA
LOC18031733	structural maintenance of chromosomes protein 2-1	-3.96903	0.186579	1.30302e-74	6.67651e-73	K06674	NA	NA	NA
LOC18055317	mechanosensitive ion channel protein 10	-3.96622	0.460567	8.2336e-14	6.07604e-13	K22048	NA	NA	NA
LOC112098883	uncharacterized LOC112098883	-3.96598	0.920205	8.47351e-05	0.0003271	NA	NA	NA	NA
LOC112100279	uncharacterized LOC112100279	-3.96585	0.419218	2.29447e-16	1.96346e-15	NA	NA	NA	NA
LOC18052247	uncharacterized LOC18052247	3.96443	1.53794	0.00199498	0.00653981	NA	NA	NA	NA
LOC18037768	uncharacterized LOC18037768	3.9633	0.0840603	0	0	NA	NA	NA	NA
LOC18051519	uncharacterized LOC18051519	3.96222	1.37144	0.00277965	0.00894569	NA	NA	NA	NA
LOC18038088	1,4-alpha-glucan-branching enzyme 2-2, chloroplastic/amyloplastic	-3.9622	0.104161	3.89289e-232	1.72306e-229	K00700	[EC:2.4.1.18]	cic00500	042
LOC18048259	cytochrome P450 71A9	3.96103	0.943054	4.49493e-05	0.000178179	K20617	NA	NA	NA
LOC112098357	uncharacterized LOC112098357	-3.95748	0.426571	1.30088e-15	1.06754e-14	NA	NA	NA	NA
LOC18052243	4-coumarate--CoA ligase-like 9	-3.95735	0.352885	3.27209e-22	3.73187e-21	NA	NA	NA	NA
LOC18054232	peroxidase 46	-3.95697	0.144525	1.66653e-121	1.99247e-119	K00430	[EC:1.11.1.7]	cic00940	081
LOC18046681	60S ribosomal protein L2, mitochondrial	-3.95601	2.73939	0.0103927	0.0308811	NA	NA	NA	NA
LOC18050849	putative cyclin-D6-1	-3.9535	2.37654	0.00581648	0.0179207	K18812	NA	NA	NA
LOC18052417	myb-related protein 308	3.95147	2.31703	0.00549368	0.0169865	NA	NA	NA	NA
LOC112095538	U4 spliceosomal RNA	-3.95043	3.11623	0.0133158	0.0388292	NA	NA	NA	NA
LOC18036442	LOB domain-containing protein 36	-3.94838	1.02952	0.000508426	0.00179146	NA	NA	NA	NA
LOC18050826	uncharacterized LOC18050826	-3.94538	0.324498	1.02765e-25	1.34708e-24	NA	NA	NA	NA
LOC18054304	DNA damage-binding protein cmr1	-3.94441	0.265573	3.13654e-37	6.06407e-36	K24755	NA	NA	NA
LOC18051287	blue copper protein	-3.94397	0.28773	3.86416e-32	6.31966e-31	NA	NA	NA	NA
LOC18054032	putative disease resistance protein At1g59780	-3.94226	0.388973	6.96983e-19	6.7533e-18	NA	NA	NA	NA
LOC18052737	secretory carrier-associated membrane protein 1	-3.94043	2.55937	0.00854751	0.0256994	K19995	NA	NA	NA
LOC18036079	calcium-transporting ATPase 2, plasma membrane-type	-3.93777	0.474127	3.7222e-13	2.65091e-12	K01537	[EC:7.2.2.10]	NA	NA
LOC18032365	inactive leucine-rich repeat receptor-like protein kinase CORYNE	-3.93738	0.219372	1.97104e-53	6.07459e-52	NA	NA	NA	NA
LOC112098352	putative disease resistance RPP13-like protein 1	-3.93605	0.219235	1.36118e-53	4.20127e-52	NA	NA	NA	NA
LOC112098571	(R)-limonene synthase 1, chloroplastic-like	3.9359	0.511643	7.61347e-12	5.02484e-11	NA	NA	NA	NA
LOC18035912	protein NUCLEAR FUSION DEFECTIVE 4	-3.93198	1.26886	0.00113914	0.0038589	NA	NA	NA	NA
LOC18042141	uncharacterized LOC18042141	3.93107	0.520478	2.37263e-11	1.52198e-10	NA	NA	NA	NA
LOC18051071	uncharacterized LOC18051071	-3.93015	0.169817	2.65003e-87	1.67564e-85	NA	NA	NA	NA
LOC18054200	auxin-responsive protein IAA29	-3.92825	0.622383	2.25519e-08	1.19043e-07	K14484	NA	cic04075	109
LOC18048144	probable polygalacturonase	-3.92715	0.258631	6.60486e-39	1.35104e-37	NA	NA	NA	NA
LOC18037472	soluble inorganic pyrophosphatase	-3.92634	0.102508	1.64557e-234	7.78016e-232	K01507	[EC:3.6.1.1]	cic00190	014
LOC18043935	mitogen-activated protein kinase kinase kinase 5	-3.92586	2.7988	0.0114296	0.0337741	NA	NA	NA	NA
LOC18050450	peroxidase 3	-3.9257	0.205723	2.08223e-60	7.71947e-59	K00430	[EC:1.11.1.7]	cic00940	081
LOC18051155	protein PYRICULARIA ORYZAE RESISTANCE 21	3.92529	0.132049	1.76663e-142	3.0626e-140	NA	NA	NA	NA
LOC18033729	4-hydroxy-3-methylbut-2-enyl diphosphate reductase, chloroplastic	-3.92516	0.630947	2.22224e-08	1.17423e-07	K03527	[EC:1.17.7.4]	cic00900	072
LOC18039121	ABC transporter G family member 34	3.92485	0.119256	3.75715e-174	9.30477e-172	NA	NA	NA	NA
LOC18039420	thaumatin-like protein 1	-3.92461	1.30822	0.00197255	0.00646831	NA	NA	NA	NA
LOC18050659	high mobility group B protein 7	-3.92357	0.20047	2.28337e-63	9.25946e-62	K25507	NA	NA	NA
LOC18037491	uncharacterized LOC18037491	3.92317	1.01632	0.000482248	0.00170384	NA	NA	NA	NA
LOC18044678	protein JASON	-3.92291	0.203202	1.94771e-61	7.47567e-60	NA	NA	NA	NA
LOC18040953	uncharacterized LOC18040953	3.91969	3.55316	0.0151844	0.0439333	NA	NA	NA	NA
LOC18041987	beta-galactosidase	-3.91911	1.80904	0.00543366	0.0168134	NA	NA	NA	NA
LOC18038290	probable calcium-binding protein CML45	3.91795	0.186643	1.45693e-72	7.11465e-71	K02183	NA	cic04016;cic04070;cic04626	107;108;116
LOC18055806	protein SRG1	-3.91564	0.996304	0.000447246	0.0015861	NA	NA	NA	NA
LOC18036670	acyl-coenzyme A oxidase 2, peroxisomal	3.91331	0.13054	1.68555e-144	2.99696e-142	K00232	[EC:1.3.3.6]	cic00071;cic00410;cic00592;cic00640;cic04146	010;035;053;059;115
LOC18043617	uncharacterized LOC18043617	-3.90805	2.26591	0.00469484	0.0146757	NA	NA	NA	NA
LOC18051856	probable O-methyltransferase 3	-3.90748	0.487798	2.81314e-12	1.90438e-11	NA	NA	NA	NA
LOC112096789	uncharacterized LOC112096789	-3.90729	2.60968	0.00961739	0.0287169	NA	NA	NA	NA
LOC18049448	purple acid phosphatase 17	-3.90599	2.46851	0.00771381	0.0233581	K14379	[EC:3.1.3.2]	cic00740	065
LOC18043784	carotenoid 9,10(9',10')-cleavage dioxygenase 1	-3.90575	0.188676	5.8705e-70	2.71991e-68	K00465	[EC:1.13.11.-]	NA	NA
LOC18043235	65-kDa microtubule-associated protein 8	-3.90473	1.13817	0.00107705	0.00365752	K16732	NA	NA	NA
LOC18043079	protein RADIALIS-like 3	3.90392	0.873781	2.02208e-05	8.32975e-05	NA	NA	NA	NA
LOC112097441	uncharacterized LOC112097441	-3.90224	0.257206	8.47254e-39	1.7246e-37	NA	NA	NA	NA
LOC112095795	shikimate O-hydroxycinnamoyltransferase-like	-3.90163	2.43883	0.00740907	0.0225206	NA	NA	NA	NA
LOC112099668	uncharacterized LOC112099668	-3.89942	2.33862	0.00596913	0.0183638	NA	NA	NA	NA
LOC18032986	inositol oxygenase 1	-3.8915	0.212055	1.29412e-55	4.21968e-54	K00469	[EC:1.13.99.1]	cic00053;cic00562	007;048
LOC18041044	cytosolic sulfotransferase 15	-3.89107	0.199739	1.15519e-62	4.60371e-61	NA	NA	NA	NA
LOC18048724	mechanosensitive ion channel protein 6	-3.8893	0.159204	2.22725e-96	1.67875e-94	K22048	NA	NA	NA
LOC18049503	uncharacterized LOC18049503	3.88778	0.27373	2.25216e-34	3.9806e-33	K20523	NA	NA	NA
LOC18043919	cytochrome P450 71D11	-3.88718	0.216665	3.00166e-53	9.19639e-52	NA	NA	NA	NA
LOC18033769	uncharacterized LOC18033769	-3.88574	1.11682	0.000491694	0.00173545	NA	NA	NA	NA
LOC18052407	receptor-like serine/threonine-protein kinase SD1-8	3.88417	0.460534	1.02849e-13	7.54433e-13	NA	NA	NA	NA
LOC18041872	ABC transporter G family member 5	-3.88203	0.202	2.09045e-60	7.72427e-59	NA	NA	NA	NA
LOC18031509	heavy metal-associated isoprenylated plant protein 31	-3.88106	0.525342	1.21829e-10	7.44319e-10	NA	NA	NA	NA
LOC18031419	photosystem I reaction center subunit II, chloroplastic	-3.87786	0.200755	3.18057e-61	1.21182e-59	K02692	NA	cic00195	015
LOC18036508	G-type lectin S-receptor-like serine/threonine-protein kinase LECRK1	-3.87751	0.152115	6.34284e-105	5.6149e-103	NA	NA	NA	NA
LOC18045115	ankyrin-3	-3.8763	0.221559	9.05728e-51	2.62057e-49	NA	NA	NA	NA
LOC18048053	malonyl-CoA:anthocyanidin 5-O-glucoside-6''-O-malonyltransferase	-3.8755	2.6149	0.00997229	0.0297126	NA	NA	NA	NA
LOC18049579	21 kDa seed protein	-3.87518	0.641813	3.29898e-08	1.71615e-07	NA	NA	NA	NA
LOC18040684	kinesin-like protein KIN-14G	3.8736	0.295775	1.39108e-29	2.10463e-28	K10406	NA	NA	NA
LOC112098724	small nucleolar RNA snoR64a	-3.87335	0.548423	6.03197e-10	3.52382e-09	NA	NA	NA	NA
LOC112100721	putative disease resistance protein RGA3	3.87197	0.357456	5.74157e-21	6.1002e-20	NA	NA	NA	NA
LOC18046344	auxin-induced protein AUX28	-3.87105	0.455317	1.01082e-13	7.41996e-13	K14484	NA	cic04075	109
LOC18040823	receptor kinase-like protein Xa21	-3.87052	1.33534	0.00174825	0.00577008	NA	NA	NA	NA
LOC18045798	disease resistance-like protein DSC1	3.86935	2.55956	0.00942142	0.0281762	NA	NA	NA	NA
LOC18049618	disease resistance-like protein DSC1	3.8673	3.10453	0.0152026	0.0439737	NA	NA	NA	NA
LOC18051404	GDSL esterase/lipase At2g42990	3.86518	1.94166	0.0062984	0.0193396	NA	NA	NA	NA
LOC18043231	cytochrome P450 78A5	-3.86421	2.65813	0.0107756	0.0319552	NA	NA	NA	NA
LOC18041052	uncharacterized LOC18041052	-3.86414	0.562271	2.02217e-09	1.14531e-08	NA	NA	NA	NA
LOC18039110	protein NSP-INTERACTING KINASE 1	-3.86302	0.330671	6.0341e-24	7.43205e-23	NA	NA	NA	NA
LOC18041062	zinc-finger homeodomain protein 1	-3.86178	0.699567	1.05754e-06	4.92388e-06	NA	NA	NA	NA
LOC18055912	uncharacterized LOC18055912	-3.86145	2.57266	0.00966715	0.0288489	NA	NA	NA	NA
LOC18055394	blue copper protein	3.86117	1.29948	0.00164173	0.00544184	NA	NA	NA	NA
LOC18044895	uncharacterized LOC18044895	-3.86102	0.107842	1.07842e-203	4.00616e-201	NA	NA	NA	NA
LOC18033836	phenylalanine ammonia-lyase 1	-3.85798	0.685321	4.53001e-07	2.16638e-06	K10775	[EC:4.3.1.24]	cic00360;cic00940	032;081
LOC18037653	uncharacterized LOC18037653	-3.85795	2.41474	0.00745898	0.022659	NA	NA	NA	NA
LOC18053839	caffeic acid 3-O-methyltransferase	3.8531	2.01853	0.00759735	0.0230296	NA	NA	NA	NA
LOC18038362	uncharacterized protein At3g28850	-3.85287	0.336613	7.63271e-23	8.96574e-22	K17479	NA	NA	NA
LOC18053299	cytokinin riboside 5'-monophosphate phosphoribohydrolase LOG8	3.85278	0.409248	2.23506e-16	1.9142e-15	K22522	[EC:3.2.2.-]	NA	NA
LOC18036641	putative disease resistance RPP13-like protein 3	-3.8526	0.223199	2.03258e-49	5.67568e-48	NA	NA	NA	NA
LOC18043206	GEM-like protein 4	-3.85104	2.92041	0.0134425	0.0391768	NA	NA	NA	NA
LOC18031261	uncharacterized protein PAM68-like	-3.85068	0.412736	6.15882e-16	5.14133e-15	NA	NA	NA	NA
LOC18044846	two-component response regulator-like APRR2	-3.85045	0.0974445	1.29383e-247	7.69014e-245	NA	NA	NA	NA
LOC18044060	transcription factor bHLH62	3.84802	0.147869	7.88265e-109	7.4878e-107	NA	NA	NA	NA
LOC18054371	uncharacterized protein At1g08160	-3.84646	0.358932	2.66572e-20	2.74394e-19	NA	NA	NA	NA
LOC18034251	AAA-ATPase At3g50940	-3.84628	0.385751	8.51442e-18	7.84435e-17	K08900	NA	NA	NA
LOC18050270	dof zinc finger protein DOF4.6	-3.83998	0.421251	2.55499e-15	2.06333e-14	NA	NA	NA	NA
LOC112096148	probable carboxylesterase 2	3.83974	2.16691	0.0046835	0.0146425	NA	NA	NA	NA
LOC18042599	putative sucrose transport protein SUC6	-3.83911	0.365434	1.91504e-19	1.89707e-18	K15378	NA	NA	NA
LOC18048770	crocetin glucosyltransferase, chloroplastic	-3.834	0.160895	1.91644e-91	1.31144e-89	NA	NA	NA	NA
LOC18036418	probable disease resistance protein At5g63020	-3.82958	0.520838	1.02192e-10	6.28594e-10	NA	NA	NA	NA
LOC18051883	abnormal spindle-like microcephaly-associated protein homolog	-3.82951	0.198148	2.53048e-61	9.67675e-60	K16743	NA	NA	NA
LOC18048976	auxin-responsive protein SAUR32	3.82741	0.648999	7.75829e-08	3.92881e-07	K14488	NA	cic04075	109
LOC18049608	histone-lysine N-methyltransferase ATXR6	-3.82723	0.488035	1.04151e-11	6.82842e-11	K24406	[EC:2.1.1.369]	cic00310	028
LOC18037701	histone H3.2	-3.82608	0.224408	2.56023e-48	6.95307e-47	K11253	NA	NA	NA
LOC18051790	uncharacterized LOC18051790	3.82368	0.173078	3.43702e-79	1.9169e-77	NA	NA	NA	NA
LOC18051057	denticleless protein homolog	-3.81891	0.400354	2.30616e-16	1.97266e-15	K11790	NA	NA	NA
LOC18035011	kynurenine formamidase	3.81716	0.162559	4.45731e-89	2.93435e-87	NA	NA	NA	NA
LOC112098449	uncharacterized LOC112098449	3.81712	0.195563	2.32281e-62	9.13447e-61	NA	NA	NA	NA
LOC18045238	glutathione transferase GST 23	3.81589	0.650804	8.49939e-08	4.28949e-07	K00799	[EC:2.5.1.18]	cic00480	041
LOC18055183	cellulose synthase-like protein E1	-3.81534	0.457383	2.26718e-13	1.63367e-12	NA	NA	NA	NA
LOC112096414	UDP-glycosyltransferase 83A1-like	-3.81159	1.03836	0.000412023	0.00146844	NA	NA	NA	NA
LOC18045029	putative U-box domain-containing protein 42	3.80783	0.248001	2.01355e-39	4.19298e-38	NA	NA	NA	NA
LOC18033198	DNA-directed RNA polymerase V subunit 5C	-3.80682	0.236248	5.96191e-43	1.39355e-41	K03013	NA	cic03020	097
LOC18044646	ACT domain-containing protein ACR6	-3.80486	0.453514	2.63138e-13	1.88826e-12	NA	NA	NA	NA
LOC112101546	putative disease resistance protein RGA3	-3.80334	2.68285	0.0117101	0.0345197	NA	NA	NA	NA
LOC18049575	kunitz trypsin inhibitor 2	-3.80047	0.573999	2.46603e-09	1.38501e-08	NA	NA	NA	NA
LOC18037791	phospholipase D alpha 4	-3.79973	0.62472	7.6078e-08	3.85542e-07	K01115	[EC:3.1.4.4]	cic00564;cic00565;cic04144	049;050;113
LOC112101135	probable calcium-binding protein CML25	-3.79692	0.749025	8.3158e-06	3.55296e-05	NA	NA	NA	NA
LOC18045386	cytochrome P450 82A3	3.79382	1.10897	0.00115731	0.00391661	NA	NA	NA	NA
LOC18034745	DNA replication licensing factor MCM2	-3.79235	0.100518	3.22941e-225	1.37105e-222	K02540	[EC:5.6.2.3]	cic03030	099
LOC18039133	floral homeotic protein APETALA 2	3.78877	0.322734	4.94949e-24	6.12883e-23	K09284	NA	NA	NA
LOC112098382	putative disease resistance RPP13-like protein 1	-3.78274	0.182919	3.47557e-69	1.58507e-67	NA	NA	NA	NA
LOC18040807	auxin-responsive protein IAA16	-3.78177	0.105586	3.89285e-203	1.39626e-200	K14484	NA	cic04075	109
LOC112097688	uncharacterized LOC112097688	-3.78128	0.341209	1.80413e-21	1.97533e-20	NA	NA	NA	NA
LOC18043730	putative calcium-transporting ATPase 11, plasma membrane-type	3.78067	0.8001	8.40274e-06	3.58717e-05	K01537	[EC:7.2.2.10]	NA	NA
LOC18044863	chlorophyll a-b binding protein 6, chloroplastic	-3.78048	0.22179	7.64729e-48	2.05538e-46	K08907	NA	cic00196	016
LOC18034718	germin-like protein 9-3	3.77969	1.5954	0.00645359	0.019784	NA	NA	NA	NA
LOC18044130	uncharacterized LOC18044130	-3.77809	1.49509	0.00366682	0.0116388	NA	NA	NA	NA
LOC18055782	auxin-responsive protein IAA27	-3.77622	0.260891	2.34347e-35	4.24292e-34	K14484	NA	cic04075	109
LOC18037809	CBL-interacting serine/threonine-protein kinase 25	3.77583	0.439883	5.62457e-14	4.20589e-13	NA	NA	NA	NA
LOC112100783	chaperonin CPN60-2, mitochondrial-like	-3.77541	0.740289	7.82133e-06	3.35133e-05	NA	NA	NA	NA
LOC18031531	oil body-associated protein 1A	3.77492	0.802141	1.00438e-05	4.25024e-05	NA	NA	NA	NA
LOC18038494	uncharacterized LOC18038494	-3.77088	0.297112	1.36128e-27	1.91343e-26	NA	NA	NA	NA
[truncated: 5,270 more rows]

## Sheet: Supplementary_Table_3
Supplementary Table 3. DEGs in the pulp of developing fruitlets of ICH as related to SCM (Log2FC=1 and α=0.01). DEGs included in the KEGG pathways (Supplementary Figure 3) and genes that did not reach 100 reads in at least one of the replicates, were removed.
		Expression Data				Gene Category and Function
Gene Id	Gene Name	log2FoldChange	lfcSE	pValue	pAdj	Level 0	Level 1	Level 2	Function
LOC18033006	heat shock protein 83	-16.6867	3.64308	2.87705e-32	7.95373e-31	Cellullar Growth	Cell division	Cell cycle	Drosophyla. Molecular chaperone that promotes the maturation, structural maintenance and proper regulation of specific target proteins involved for instance in cell cycle control and signal transduction. Undergoes a functional cycle that is linked to its ATPase activity. This cycle probably induces conformational changes in the client proteins, thereby causing their activation. Interacts dynamica…
LOC18035879	acid phosphatase 1	-16.2872	3.60419	1.16581e-30	3.02643e-29	NA	Uncharacterized process	NA	Acid phosphatase activity
LOC18036667	defensin-like protein 1	-15.541	3.53014	7.9903e-28	1.83682e-26	Stress Responses	Plant defense	NA	Disease resistance protein
LOC18043348	tyrosine/DOPA decarboxylase 5	-15.1267	3.4883	2.47617e-26	5.35129e-25	Secondary Metabolism	Alkaloids	Betalains	May play an important role in providing precursors for alkaloid synthesis in the roots and germinating seedlings.
LOC18033150	F-box protein At2g02240	14.7826	2.62706	1.8655e-27	4.21112e-26	Development	Seed, embryo development	NA	Embryo development ending in seed dormancy
LOC18047282	ankyrin repeat-containing protein NPR4	14.6678	3.52694	5.84143e-24	1.14184e-22	Stress Responses	Abiotic stress	Salt	Involved in salt stress tolerance.
LOC18054015	UDP-glycosyltransferase 79B3	-14.4254	3.41558	5.71985e-24	1.1191e-22	Secondary Metabolism	Terpenoids	NA	This protein is involved in the pathway terpenoid biosynthesis, which is part of Secondary metabolite biosynthesis.
LOC18034083	secoisolariciresinol dehydrogenase	-14.1414	3.38726	6.30118e-23	1.17868e-21	NA	Lignan metabolism	NA	Oxidoreductase involved in lignan biosynthesis. Catalyzes the stereospecific conversion of (-)-secoisolariciresinol to (-)-matairesinol via a lactol intermediate.
LOC18042657	probable disease resistance protein At4g27220	-14.0561	3.37684	9.15354e-23	1.70027e-21	Stress Responses	Plant defense	NA	Probably disease resistance protein
LOC18043275	pre-mRNA-processing factor 19	-13.8967	3.36187	4.10873e-22	7.41207e-21	Gene Expression	Transcription	Post-transcription	Ubiquitin-protein ligase which is a core component of several complexes mainly involved pre-mRNA splicing and DNA repair. Required for pre-mRNA splicing as component of the spliceosome (PubMed:28502770, PubMed:28076346, PubMed:29360106, PubMed:29301961, PubMed:30705154).Core component of the PRP19C/Prp19 complex/NTC/Nineteen complex which is part of the spliceosome and participates in its assembl…
LOC18052677	protein PLANT CADMIUM RESISTANCE 2	13.8584	2.80789	2.07053e-20	3.45418e-19	Regulation and Transport	Transport	Zinc	Zinc transporter acting in both zinc extrusion and long-distance zinc transport. Involved in the loading of zinc into the xyleme and in the detoxification of excess zinc at the epidermal cells. Acts independently from the zinc transporters HMA2 and HMA4. May be also involved in cadmium resistance.
LOC112099277	uncharacterized LOC112099277	-13.8317	3.35551	7.18462e-22	1.27769e-20	NA	Uncharacterized process	NA	Uncharacterized process
LOC112099295	uncharacterized LOC112099295	-13.7855	3.34908	7.72696e-22	1.37184e-20	NA	Uncharacterized process	NA	Uncharacterized process
LOC18032537	serine/threonine-protein phosphatase 6 regulatory ankyrin repeat subunit B	13.705	2.6901	4.90235e-23	9.23508e-22	Signalling	Receptors, kinases, transduction	NA	Putative regulatory subunit of protein phosphatase 6 (PP6) that may be involved in the recognition of phosphoprotein substrates.-
LOC18034319	uncharacterized LOC18034319	-13.6688	3.3059	1.42198e-21	2.49545e-20	NA	Uncharacterized process	NA	Uncharacterized process
LOC18040068	uncharacterized LOC18040068	-13.6477	3.34767	1.71411e-20	2.86857e-19	NA	Uncharacterized process	NA	Uncharacterized process
LOC112096701	putative disease resistance protein RGA3	-13.6025	3.3285	2.38609e-21	4.14297e-20	Stress Responses	Plant defense	NA	Belongs to a four-gene family located at the same locus. Although the four genes are expressed in the resistant haplotype, only RGA2 confers the resistance to P.infestans. In the susceptible haplotype, RGA1 and RGA3 are likely to be pseudogenes created by deletions and mutations, while RGA2 contains also several modifications.
LOC18034178	vacuolar cation/proton exchanger 3	-13.4608	3.3284	6.61438e-20	1.07728e-18	Regulation and Transport	Transport	Vacuolar cation/proton exchanger	Vacuolar cation/proton exchanger (CAX). Translocates Ca2+ and other metal ions into vacuoles using the proton gradient formed by H+-ATPase and H+-pyrophosphatase (By similarity).Involved in ion homeostasis in association with CAX1.
LOC112095831	uncharacterized LOC112095831	-13.3979	3.31183	2.29635e-20	3.82192e-19	NA	Uncharacterized process	NA	Uncharacterized process
LOC18041135	basic blue protein	-13.3892	3.30624	1.1887e-20	2.00188e-19	Development	Gametophyte	Fertilization	This type 1 copper protein appears to be the same protein in cucumber seedlings, peelings, and several other plant sources. Pollination. Forms a concentration gradient along the pollen tube growth path, with a lower level in the stigma papilla cell wall and a higher level in the transmitting tract extracellular matix of the style
LOC112098433	uncharacterized LOC112098433	-13.3595	0.815546	1.06857e-49	5.08872e-48	NA	Uncharacterized process	NA	Uncharacterized process
LOC18039116	nucleosome assembly protein 1;2	13.3078	2.65266	3.71341e-22	6.7389e-21	Gene Expression	Chromatin, histones	NA	May modulate chromatin structure by regulation of nucleosome assembly/disassembly (By similarity).May function in nucleotide excision repair (NER). Involved in somatic homologous recombination.
LOC18034048	probable metal-nicotianamine transporter YSL6	-13.2216	3.28906	4.35059e-20	7.16249e-19	Regulation and Transport	Transport	Metal-nicotianamines	May be involved in the transport of nicotianamine-chelated metals.
LOC18048636	protein STICHEL-like 2	-13.1881	3.28626	6.21137e-20	1.01242e-18	NA	Uncharacterized process	NA	Uncharacterized process
LOC112097332	uncharacterized LOC112097332	-13.075	3.27534	1.62714e-19	2.58871e-18	NA	Uncharacterized process	NA	Uncharacterized process
LOC18052892	UPF0481 protein At3g47200	13.0728	3.18036	3.6492e-19	5.64949e-18	NA	Uncharacterized process	NA	Uncharacterized process
LOC18043390	sodium/hydrogen exchanger 6	-13.0689	3.23504	1.33438e-19	2.13251e-18	Regulation and Transport	Transport	Sodium	Electroneutral exchange of protons for Na+ and K+ across the early and recycling endosome membranes. Contributes to calcium homeostasis.
LOC18033043	uncharacterized LOC18033043	-13.0673	3.27264	1.30279e-19	2.08514e-18	NA	Uncharacterized process	NA	Uncharacterized process
LOC18050970	UDP-glycosyltransferase 90A1	13.0311	3.06476	5.35338e-19	8.21611e-18	NA	Uncharacterized process	NA	UDP-glycosyltransferase activity
LOC18053682	uncharacterized LOC18053682	-13.0001	3.26417	1.88958e-19	2.99282e-18	NA	Uncharacterized process	NA	Uncharacterized process
LOC112099313	uncharacterized LOC112099313	-12.9573	3.26165	3.29157e-19	5.12565e-18	NA	Uncharacterized process	NA	Uncharacterized process
LOC18044420	probable metal-nicotianamine transporter YSL7	-12.9242	3.31264	2.55983e-16	3.34712e-15	Regulation and Transport	Transport	Metal-nicotianamines	May be involved in the transport of nicotianamine-chelated metals.
LOC112097042	putative disease resistance protein RGA3	12.921	2.78186	4.56871e-20	7.51577e-19	Stress Responses	Plant defense	NA	Belongs to a four-gene family located at the same locus. Although the four genes are expressed in the resistant haplotype, only RGA2 confers the resistance to P.infestans. In the susceptible haplotype, RGA1 and RGA3 are likely to be pseudogenes created by deletions and mutations, while RGA2 contains also several modifications.
LOC112099275	uncharacterized LOC112099275	-12.8488	3.24786	4.91623e-19	7.56154e-18	NA	Uncharacterized process	NA	Uncharacterized process
LOC112096243	uncharacterized LOC112096243	-12.8452	3.25571	7.78148e-19	1.18487e-17	NA	Uncharacterized process	NA	Uncharacterized process
LOC18054401	receptor-like serine/threonine-protein kinase SD1-8	12.836	2.77663	8.73033e-20	1.41218e-18	Cellullar Growth	Cell expansion	NA	Involved in the regulation of cellular expansion and differentiation.
LOC18055469	transcription factor MYBS3	-12.7926	3.24338	9.00978e-19	1.36798e-17	Stress Responses	Abiotic stress	Cold	Transcription repressor that binds to 5'-TATCCA-3' elements in gene promoters. Contributes to the sugar-repressed transcription of promoters containing SRS or 5'-TATCCA-3' elements. Transcription repressor involved in a cold stress response pathway that confers cold tolerance. Suppresses the DREB1-dependent signaling pathway under prolonged cold stress. DREB1 responds quickly and transiently whil…
LOC112095901	uncharacterized LOC112095901	-12.7723	3.24319	1.35918e-18	2.03897e-17	NA	Uncharacterized process	NA	Uncharacterized process
LOC18046240	chaperonin CPN60-2, mitochondrial	12.7631	2.94127	3.14661e-19	4.91791e-18	Gene Expression	Ubiquitination	Proteasome	Implicated in mitochondrial protein import and macromolecular assembly. May facilitate the correct folding of imported proteins. May also prevent misfolding and promote the refolding and proper assembly of unfolded polypeptides generated under stress conditions in the mitochondrial matrix.
LOC18052683	cytochrome P450 71A1	12.7595	1.69717	3.43235e-13	3.73731e-12	Secondary Metabolism	Phenylpropanoids	NA	Involved in the metabolism of compounds associated with the development of flavor in the ripening fruit process, possibly by acting as trans-cinnamic acid 4-hydrolase.
LOC18050857	zinc transporter 8	-12.756	3.24649	2.9583e-18	4.36708e-17	Regulation and Transport	Transport	Zinc	Facilitates the accumulation of zinc from the cytoplasm into intracellular vesicles, being a zinc-efflux transporter. May be a major component for providing zinc to insulin maturation and/or storage processes in insulin-secreting pancreatic beta-cells.
LOC112098305	coumarin 8-geranyltransferase 1b, chloroplastic-like	12.6936	2.76351	2.68048e-19	4.20482e-18	Development	Chloroplast	Phenylpropanoids.	Coumarin 8-geranyltransferase 1b, chloroplastic = Prenyltransferase specific for geranyl diphosphate as prenyl donor and coumarin as prenyl acceptor. Can use umbelliferone and esculetin as substrates, and with a lower activity, 5,7-dihydroxy-coumarin and 5-methoxy-7-hydroxycoumarin. No activity with 5-hydroxy-7-methoxycoumarin, bergaptol, xanthotoxol, p-coumaric acid, caffeic acid, 2,4-dihydroxyc…
LOC112098326	uncharacterized LOC112098326	-12.6902	3.23255	1.86107e-18	2.77427e-17	NA	Uncharacterized process	NA	Uncharacterized process
LOC18035409	geraniol 8-hydroxylase	-12.5882	3.21449	6.4381e-18	9.36119e-17	Secondary Metabolism	Alkaloids	Vinblastine	Hydroxylase involved in the biosynthesis of hydroxygeraniol, a precursor of the terpenoid indole alkaloids such as vinblastine and vincristine. Also able to hydroxylate in vitro nerol and to catalyze 3'-hydroxylation of the flavanone naringenin to form eriodictyol. No activity with apigenin, kaempferol, p-coumaric acid and ferulic acid as substrates.
LOC18045399	putative disease resistance RPP13-like protein 1	-12.5841	3.22054	3.53291e-18	5.19731e-17	Stress Responses	Plant defense	NA	Potential disease resistance protein.
LOC18046075	uncharacterized protein At1g05835	-12.5622	3.22068	5.67942e-18	8.28635e-17	NA	Uncharacterized process	NA	Uncharacterized process
LOC18054884	ABC transporter C family member 3	12.459	3.30004	6.29029e-17	8.57244e-16	Regulation and Transport	Transport	ABC	Pump for glutathione S-conjugates. Mediates the transport of glutathione conjugates such as chlorodinitrobenzene-GS (DNB-GS), and of chlorophyll catabolites such as Bn-NCC-1. Transports also heavy metals such as cadmium (Cd).
LOC18040137	F-box protein PP2-B15	-12.4283	3.29913	8.89844e-14	1.00756e-12	Signalling	Receptors, kinases, transduction	NA	F-box protein
LOC18033438	major allergen Pru ar 1	12.4077	1.30246	1.14863e-22	2.12248e-21	NA	Uncharacterized process	NA	Uncharacterized process
LOC18035284	uncharacterized LOC18035284	-12.4011	3.20093	1.23771e-17	1.76826e-16	NA	Uncharacterized process	NA	Uncharacterized process
LOC112096702	putative disease resistance protein RGA3	-12.3721	3.1783	1.34747e-17	1.92121e-16	Stress Responses	Plant defense	NA	Belongs to a four-gene family located at the same locus. Although the four genes are expressed in the resistant haplotype, only RGA2 confers the resistance to P.infestans. In the susceptible haplotype, RGA1 and RGA3 are likely to be pseudogenes created by deletions and mutations, while RGA2 contains also several modifications.
LOC112099818	putative disease resistance protein RGA4	12.3666	2.5353	3.5302e-19	5.47322e-18	Stress Responses	Plant defense	NA	Belongs to a four-gene family located at the same locus. Although the four genes are expressed in the resistant haplotype, only RGA2 confers the resistance to P.infestans. In the susceptible haplotype, RGA1 and RGA3 are likely to be pseudogenes created by deletions and mutations, while RGA2 contains also several modifications.
LOC112099665	caffeic acid 3-O-methyltransferase-like	12.3178	3.28608	1.72291e-16	2.27798e-15	Secondary Metabolism	Phenylpropanoids	Lignins	Catalyzes the conversion of caffeic acid to ferulic acid and of 5-hydroxyferulic acid to sinapic acid. The resulting products may subsequently be converted to the corresponding alcohols that are incorporated into lignins.
LOC18044629	agamous-like MADS-box protein AGL29	-12.2545	3.18524	4.21808e-17	5.82297e-16	Gene Expression	Transcription	NA	Probable transcription factor
LOC18041639	protein SRG1	12.2194	3.07695	1.09296e-16	1.46881e-15	Stress Responses	Plant defense	NA	S-nitrosylation of the zinc finger protein SRG1 regulates plant immunity. Unlike the homologous protein NCS1 of Coptis japonica, SRG1 has no norcoclaurine synthase activity.
LOC112098432	uncharacterized LOC112098432	-12.1878	0.607084	9.47551e-75	8.16621e-73	NA	Uncharacterized process	NA	Uncharacterized process
LOC18034993	anti-sigma-I factor RsgI6	-12.1124	3.17	8.69035e-17	1.1753e-15	Primary Metabolism	Sugar metabolism	NA	Acetivibrio thermocellus. Xylan degradation. Anti-sigma factor for SigI6. Negatively regulates SigI6 activity through direct interaction. Binding of the polysaccharide substrate to the extracellular C-terminal sensing domain of RsgI6 may induce a conformational change in its N-terminal cytoplasmic region, leading to the release and activation of SigI6 (By similarity).Binds to and hydrolyzes insol…
LOC112098073	uncharacterized LOC112098073	12.082	2.60338	7.85271e-18	1.13406e-16	NA	Uncharacterized process	NA	Uncharacterized process
LOC18054952	cold and drought-regulated protein CORA	12.0602	0.378008	8.86819e-189	4.44517e-186	Stress Responses	Abiotic stress	Cold	May be involved in resistance of the plant to environmental stress.
LOC18047634	putative disease resistance RPP13-like protein 1	12.0563	2.93686	9.02298e-17	1.21719e-15	Stress Responses	Plant defense	NA	Potential disease resistance protein.
LOC112100803	uncharacterized LOC112100803	-12.0538	3.16198	1.05348e-16	1.41753e-15	NA	Uncharacterized process	NA	Uncharacterized process
LOC112098336	uncharacterized LOC112098336	-12.0356	3.16337	1.7379e-16	2.29495e-15	NA	Uncharacterized process	NA	Uncharacterized process
LOC18052402	G-type lectin S-receptor-like serine/threonine-protein kinase At1g11410	12.0128	2.76082	5.84867e-17	7.98593e-16	Signalling	Receptors, kinases, transduction	NA	G-type lectin S-receptor-like serine/threonine-protein kinase
LOC18035327	nitrate regulatory gene2 protein	-12.0103	3.17971	1.54567e-15	1.92864e-14	NA	Nitrate signalling	NA	Required for nitrate signaling. Regulates expression of the nitrate-responsive genes NIA1, NIR1, NRT2.1 and NPF6.3/NRT1.1.
LOC18051735	uncharacterized LOC18051735	-12.0099	3.13783	1.89876e-16	2.50426e-15	NA	Uncharacterized process	NA	Uncharacterized process
LOC18049491	ankyrin-1	-12.0078	3.15095	2.96897e-16	3.87258e-15	NA	Uncharacterized process	NA	Homo. Attaches integral membrane proteins to cytoskeletal elements; binds to the erythrocyte membrane protein band 4.2, to Na-K ATPase, to the lymphocyte membrane protein GP85, and to the cytoskeletal proteins fodrin, tubulin, vimentin and desmin. Erythrocyte ankyrins also link spectrin (beta chain) to the cytoplasmic domain of the erythrocytes anion exchange protein; they retain most or all of t…
LOC18045727	beta-amyrin synthase	12.0027	0.714377	1.18491e-51	5.93489e-50	Secondary Metabolism	Terpenoids	Triterpenes	Converts oxidosqualene to beta-amyrin. Triterpenoid biosynthetic process
LOC112097182	disease resistance protein At4g27190-like	-11.938	3.14885	2.10381e-16	2.76273e-15	Stress Responses	Plant defense	NA	Disease resistance protein
LOC18035999	putative disease resistance protein At4g19050	-11.9266	3.1487	2.55645e-16	3.34475e-15	Stress Responses	Plant defense	NA	Disease resistance protein
LOC18037321	G-type lectin S-receptor-like serine/threonine-protein kinase At1g67520	-11.9159	3.14616	2.35408e-16	3.08568e-15	Signalling	Receptors, kinases, transduction	NA	G-type lectin S-receptor-like serine/threonine-protein kinase
LOC18040493	beta-galactosidase 6	-11.8907	3.14537	3.43831e-16	4.45473e-15	Primary Metabolism	Sugar metabolism	NA	Hydrolysis of terminal non-reducing beta-D-galactose residues in beta-D-galactosides
LOC18036655	uncharacterized LOC18036655	-11.8754	3.14328	3.60725e-16	4.6651e-15	NA	Uncharacterized process	NA	Uncharacterized process
LOC112101110	uncharacterized LOC112101110	-11.864	3.14599	5.97066e-16	7.63348e-15	NA	Uncharacterized process	NA	Uncharacterized process
LOC112096194	uncharacterized LOC112096194	-11.8388	3.14466	8.15951e-16	1.03449e-14	NA	Uncharacterized process	NA	Uncharacterized process
LOC18050534	MDIS1-interacting receptor like kinase 2	-11.7726	3.13847	1.22255e-15	1.53355e-14	Development	Gametophyte	Fertilization	Involved in the pollen tube perception of the female signal.
LOC18052012	patatin-like protein 1	-11.7695	3.13046	6.22022e-16	7.943e-15	Primary Metabolism	Lipids and Fatty Acids	NA	Possesses non-specific lipolytic acyl hydrolase (LAH) activity. Catalyzes the hydrolysis of the neutral lipids monogalactosyldiacylglycerol (MGDG), digalactosyldiacylglycerol (DGDG) and phosphatidylglycerol (PG), and less efficiently the polar lipids phosphatidylcholine (PC) and phosphatidylinositol (PI), but not the storage lipid triacylglycerol (TAG). May play a role in root development.
LOC18043155	tryptophan aminotransferase-related protein 3	-11.7683	3.13938	1.61778e-15	2.01625e-14	NA	Amino acid metabolism	NA	Probable aminotransferase.
LOC112096713	putative disease resistance protein RGA3	-11.7501	3.13103	9.36762e-16	1.18554e-14	Stress Responses	Plant defense	NA	Belongs to a four-gene family located at the same locus. Although the four genes are expressed in the resistant haplotype, only RGA2 confers the resistance to P.infestans. In the susceptible haplotype, RGA1 and RGA3 are likely to be pseudogenes created by deletions and mutations, while RGA2 contains also several modifications.
LOC18034668	uncharacterized LOC18034668	11.7318	2.8755	3.76226e-16	4.85967e-15	NA	Uncharacterized process	NA	Uncharacterized process
LOC18035663	uncharacterized LOC18035663	11.6916	2.65889	1.05296e-16	1.41753e-15	NA	Uncharacterized process	NA	Uncharacterized process
LOC18035901	probable indole-3-acetic acid-amido synthetase GH3.1	-11.6916	3.13474	3.75633e-15	4.59282e-14	Regulation and Transport	Hormonal regulation	Auxins	Catalyzes the synthesis of indole-3-acetic acid (IAA)-amino acid conjugates, providing a mechanism for the plant to cope with the presence of excess auxin.
LOC18036712	putative disease resistance RPP13-like protein 2	-11.6841	3.12017	9.67651e-16	1.22391e-14	Stress Responses	Plant defense	NA	Potential disease resistance protein.
LOC18044478	metal transporter Nramp6	-11.678	3.06777	8.73908e-16	1.10731e-14	Regulation and Transport	Transport	Cadmium	Probable intracellular cadmium (Cd) transporter that participates in the distribution or availability of Cd within the cell.
LOC18033574	LOB domain-containing protein 4	11.6565	2.80691	1.02398e-15	1.29285e-14	Gene Expression	Transcription	NA	transcription cis-regulatory region binding
LOC18053506	WUSCHEL-related homeobox 6	-11.6322	1.31365	4.81741e-20	7.90656e-19	Development	Gametophyte	Fertilization	Transcription factor that plays a central role in ovule patterning by regulating cell proliferation of the maternal integuments and differentiation of the maegaspore mother cell (MCC). Involved in AGAMOUS (AG) repression in leaves.
LOC18032066	two-component response regulator ARR12	-11.6188	3.1246	2.67358e-15	3.29545e-14	Regulation and Transport	Hormonal regulation	Cytokinins	Transcriptional activator that binds specifically to the DNA sequence 5'-[AG]GATT-3'. Functions as a response regulator involved in His-to-Asp phosphorelay signal transduction system. Phosphorylation of the Asp residue in the receiver domain activates the ability of the protein to promote the transcription of target genes. Could directly activate some type-A response regulators in response to cyt…
LOC112100170	uncharacterized LOC112100170	11.5559	2.52462	1.42519e-16	1.89613e-15	NA	Uncharacterized process	NA	Uncharacterized process
LOC112097434	uncharacterized LOC112097434	-11.5542	3.10668	2.37162e-15	2.93515e-14	NA	Uncharacterized process	NA	Uncharacterized process
LOC112100350	uncharacterized LOC112100350	-11.5306	3.10528	3.10494e-15	3.81831e-14	NA	Uncharacterized process	NA	Uncharacterized process
LOC18034978	BEL1-like homeodomain protein 1	11.5101	1.2968	1.37139e-19	2.19e-18	Gene Expression	Transcription	NA	DNA-binding transcription factor activity
LOC112097255	uncharacterized LOC112097255	-11.5101	3.10196	3.16653e-15	3.88955e-14	NA	Uncharacterized process	NA	Uncharacterized process
LOC112098278	uncharacterized LOC112098278	-11.505	3.10295	3.81373e-15	4.66032e-14	NA	Uncharacterized process	NA	Uncharacterized process
LOC18038551	uncharacterized LOC18038551	-11.5002	3.10013	3.1251e-15	3.84087e-14	NA	Uncharacterized process	NA	Uncharacterized process
LOC112100059	uncharacterized LOC112100059	-11.4817	3.10555	5.15049e-15	6.23655e-14	NA	Uncharacterized process	NA	Uncharacterized process
LOC18037596	uncharacterized LOC18037596	-11.4756	3.0988	4.18449e-15	5.10167e-14	NA	Uncharacterized process	NA	Uncharacterized process
LOC112095900	uncharacterized LOC112095900	-11.4552	3.09551	4.27612e-15	5.20742e-14	NA	Uncharacterized process	NA	Uncharacterized process
LOC18045400	auxin response factor 4	-11.4448	0.962937	2.58776e-25	5.39525e-24	Regulation and Transport	Hormonal regulation	Auxins	Auxin response factors (ARFs) are transcriptional factors that bind specifically to the DNA sequence 5'-TGTCTC-3' found in the auxin-responsive promoter elements (AuxREs). Seems to act as transcriptional repressor. Formation of heterodimers with Aux/IAA proteins may alter their ability to modulate early auxin response genes expression. Promotes flowering, stamen development, floral organ abscissi…
LOC18032835	bidirectional sugar transporter SWEET17	-11.4438	3.07221	4.49096e-15	5.46593e-14	Regulation and Transport	Transport	Sugars	Acts as a vacuolar hexose transporter (PubMed:25988582).Regulates fructose (Fru) homeostasis in leaves and roots by exporting/importing Fru through the tonoplast regarding metabolic demand (PubMed:23583552, PubMed:24381066).
LOC112097248	50S ribosomal protein HLP, mitochondrial-like	-11.4419	3.09304	4.193e-15	5.10913e-14	Gene Expression	Translation	Ribosomal proteins	Ribosomal protein
LOC18052579	putative lipid-transfer protein DIR1	-11.4129	0.710718	5.1841e-47	2.25673e-45	Stress Responses	Plant defense	NA	Putative lipid transfer protein required for systemic acquired resistance (SAR) long distance signaling. May interact with a lipid-derived molecule to promote long distance signaling associated with SAR. Together with AZI1, required for glycerol-3-phosphate- (G3P) and azelaic acid- (AA) induced systemic acquired resistance (SAR). Component of plant systemic immunity involved in priming defenses i…
LOC112097050	uncharacterized LOC112097050	-11.4128	3.09133	5.82713e-15	7.04385e-14	NA	Uncharacterized process	NA	Uncharacterized process
LOC112097740	uncharacterized LOC112097740	11.3623	2.46604	3.6043e-16	4.66412e-15	NA	Uncharacterized process	NA	Uncharacterized process
LOC112098872	phosphoglucan phosphatase DSP4, amyloplastic-like	-11.3548	3.09377	1.52085e-14	1.79758e-13	Development	Chloroplast	Starch	protein tyrosine/serine/threonine phosphatase activity
LOC18050105	BAG family molecular chaperone regulator 6	-11.3496	3.08801	1.21564e-14	1.44404e-13	Stress Responses	Cell death	NA	Co-chaperone that regulates diverse cellular pathways, such as programmed cell death and stress responses (PubMed:16003391).Involved in plant basal resistance (PubMed:16636050, PubMed:26739014). Involved in basal heat response through the regulation of the heat induced small HSP (sHSP) transcriptional cascade (PubMed:26580143).
LOC18040621	DNA-directed RNA polymerase II subunit 1	-11.3482	3.22605	1.00597e-10	9.42522e-10	Gene Expression	Transcription	RNA polymerase	DNA-directed RNA polymerase II subunit 1
LOC18044735	probable RNA-binding protein ARP1	-11.3424	3.0831	8.57901e-15	1.02654e-13	Regulation and Transport	Hormonal regulation	Abscicic acid	Probable RNA-binding protein involved in the regulation of abscisic acid (ABA) response during seed germination. May regulate transcript levels of several germination-responsive genes under ABA.
LOC18048819	CSC1-like protein At4g02900	-11.3	3.0788	1.15368e-14	1.37274e-13	Regulation and Transport	Transport	Cation chanel	Acts as an osmosensitive calcium-permeable cation channel.
LOC18055428	lachrymatory-factor synthase	-11.286	1.31224	7.5669e-19	1.15384e-17	NA	Uncharacterized process	NA	Produces lacrymatory factor (propanthial S-oxide) from 1-propenylsulphenic acid, an unstable compound resulting from the degradation of trans-1-propenyl-L-cysteine sulphoxide (PRENCSO) by alliinase.
LOC18033101	probable methyltransferase PMT15	-11.2638	3.07651	1.6852e-14	1.98631e-13	NA	Uncharacterized process	NA	Methyltransferase activity
LOC18045170	aldehyde oxidase GLOX	-11.2525	3.07621	1.97216e-14	2.3143e-13	Stress Responses	Plant defense	NA	Catalyzes the oxidation of aldehydes to the corresponding carboxylate by coupling the reaction to the reduction of dioxygen to hydrogen peroxide. Substrates include glyoxal and other aldehydes (By similarity). Involved in disease resistance against the grapevine powdery mildew E.necator. Is sufficient to confer disease resistance to E.necator (PubMed:20512385, PubMed:23090239). Can produce hydrog…
LOC18035133	uncharacterized LOC18035133	-11.2458	3.06714	1.69204e-14	1.99328e-13	NA	Uncharacterized process	NA	Uncharacterized process
LOC18031586	trans-resveratrol di-O-methyltransferase	11.1915	3.17052	2.87044e-13	3.1351e-12	NA	Phytoalexins	Phenylpropanoids	Catalyzes the biosynthesis of pterostilbene from resveratrol. Pterostilbene has both antifungal and pharmacological properties. Also has activity toward resveratrol monomethyl ether (RME).
LOC18044764	putative ABC transporter C family member 15	-11.1015	3.07498	1.78203e-13	1.97367e-12	Regulation and Transport	Transport	ABC	Pump for glutathione S-conjugates.
LOC18031593	sugar transport protein 8	-11.0894	3.06371	9.65405e-14	1.08906e-12	Regulation and Transport	Transport	Sugars	monosaccharide transmembrane transporter activity
LOC18041693	putative disease resistance protein RGA3	-11.0735	3.02475	3.28683e-14	3.79635e-13	Stress Responses	Plant defense	NA	Belongs to a four-gene family located at the same locus. Although the four genes are expressed in the resistant haplotype, only RGA2 confers the resistance to P.infestans. In the susceptible haplotype, RGA1 and RGA3 are likely to be pseudogenes created by deletions and mutations, while RGA2 contains also several modifications.
LOC18036713	uncharacterized LOC18036713	-11.0627	3.024	3.27326e-14	3.78273e-13	NA	Uncharacterized process	NA	Uncharacterized process
LOC112098365	putative 12-oxophytodienoate reductase 11	11.0522	3.01127	5.65113e-13	6.03288e-12	Primary Metabolism	Lipids and Fatty Acids	Oxylipin	Putative oxophytodienoate reductase that may be involved in the biosynthesis or metabolism of oxylipin signaling molecules.
LOC112096001	small nucleolar RNA snoR28	11.0177	3.15337	8.9137e-13	9.39336e-12	Gene Expression	Nucleic acids processing	NA	Small nucleolar RNA R28 is a non-coding RNA (ncRNA) molecule which functions in the modification of other small nuclear RNAs (snRNAs)
LOC18046843	cytochrome P450 71A26	10.9805	0.809417	3.30742e-33	9.55292e-32	Stress Responses	Redox	Oxidoreductases	iron ion binding
LOC112101571	uncharacterized LOC112101571	-10.9445	3.0394	9.45122e-14	1.06731e-12	NA	Uncharacterized process	NA	Uncharacterized process
LOC18045036	golgin subfamily B member 1	-10.9324	3.04487	1.09077e-13	1.22658e-12	Regulation and Transport	Trafficking, vesicles	NA	May participate in forming intercisternal cross-bridges of the Golgi complex.
LOC18044909	uncharacterized LOC18044909	-10.884	3.03516	1.69077e-13	1.87553e-12	NA	Uncharacterized process	NA	Uncharacterized process
LOC112098884	uncharacterized LOC112098884	-10.8561	3.02361	1.47238e-13	1.64528e-12	NA	Uncharacterized process	NA	Uncharacterized process
LOC18032191	ankyrin repeat-containing protein At5g02620	10.8457	2.65327	1.67844e-13	1.86282e-12	NA	Uncharacterized process	NA	Protein phosphatase regulator activity
LOC18052011	uncharacterized LOC18052011	-10.8301	3.02372	1.91071e-13	2.10961e-12	NA	Uncharacterized process	NA	Uncharacterized process
LOC18038600	15.7 kDa heat shock protein, peroxisomal	10.8068	2.78851	2.83812e-13	3.10139e-12	Stress Responses	Abiotic stress	NA	Heat shock protein
LOC18052870	flavonoid 3'-monooxygenase	-10.7464	1.31757	6.6633e-17	9.06916e-16	Secondary Metabolism	Flavonoids	Flavanones, flavonols	Catalyzes the 3'-hydroxylation of the flavonoid B-ring to the 3',4'-hydroxylated state. Convert naringenin to eriodictyol and dihydrokaempferol to dihydroquercetin.
LOC18038442	F-box/FBD/LRR-repeat protein At5g53840	-10.7403	3.01377	2.48107e-13	2.7168e-12	Signalling	Receptors, kinases, transduction	NA	F-box/FBD/LRR-repeat protein
LOC18038412	putative UPF0481 protein At3g02645	-10.737	3.01453	2.77765e-13	3.03687e-12	NA	Uncharacterized process	NA	Uncharacterized process
LOC18034249	hevein-like preproprotein	10.7344	3.00143	3.63083e-12	3.69806e-11	Stress Responses	Plant defense	NA	Fungal growth inhibitors. Neither CB-HEL nor CD-HEL have chitinase activity, but both have antimicrobial activities. CD-HEL has RNase, but no DNase activity.
LOC112098990	caffeoylshikimate esterase-like	-10.7256	3.01573	3.62295e-13	3.93277e-12	Secondary Metabolism	Phenylpropanoids	Lignins	Caffeoylshikimate esterase = Esterase involved in the biosynthesis of lignin. Hydrolyzes caffeoylshikimate into caffeate and shikimate. Together with 4-coumarate--CoA ligase (4CL), acts on an alternative reaction for the formation of caffeoyl-CoA and bypasses the second reaction of shikimate O-hydroxycinnamoyltransferase (HST). Accepts also 4-coumaroylshikimate as substrate, but with lower activi…
LOC18042992	uncharacterized LOC18042992	10.6991	2.41251	1.43951e-14	1.70522e-13	NA	Uncharacterized process	NA	Uncharacterized process
LOC18040808	auxin-induced protein 22D	-10.6715	3.0119	5.86797e-13	6.25563e-12	Regulation and Transport	Hormonal regulation	Auxins	Aux/IAA proteins are short-lived transcriptional factors that function as repressors of early auxin response genes at low auxin concentrations. Repression is thought to result from the interaction with auxin response factors (ARFs), proteins that bind to the auxin-responsive promoter element (AuxRE). Formation of heterodimers with ARF proteins may alter their ability to modulate early auxin respo…
LOC112098987	caffeoylshikimate esterase-like	-10.6705	3.01029	5.83707e-13	6.22826e-12	Secondary Metabolism	Phenylpropanoids	Lignins	Caffeoylshikimate esterase = Esterase involved in the biosynthesis of lignin. Hydrolyzes caffeoylshikimate into caffeate and shikimate. Together with 4-coumarate--CoA ligase (4CL), acts on an alternative reaction for the formation of caffeoyl-CoA and bypasses the second reaction of shikimate O-hydroxycinnamoyltransferase (HST). Accepts also 4-coumaroylshikimate as substrate, but with lower activi…
LOC18036656	uncharacterized LOC18036656	-10.6662	0.970329	6.99489e-22	1.24499e-20	NA	Uncharacterized process	NA	Uncharacterized process
LOC112098556	uncharacterized LOC112098556	-10.628	3.0066	7.23371e-13	7.6609e-12	NA	Uncharacterized process	NA	Uncharacterized process
LOC18039967	protein FAR1-RELATED SEQUENCE 5	-10.6177	2.93928	3.73092e-13	4.04174e-12	Regulation and Transport	Light signalling	NA	Putative transcription activator involved in regulating light control of development.
LOC112100154	uncharacterized LOC112100154	-10.6122	3.00176	6.22557e-13	6.61956e-12	NA	Uncharacterized process	NA	Uncharacterized process
LOC112095597	uncharacterized LOC112095597	-10.6027	3.0084	9.46037e-13	9.94484e-12	NA	Uncharacterized process	NA	Uncharacterized process
LOC18053696	caffeic acid 3-O-methyltransferase	10.5862	2.87003	3.21271e-12	3.28478e-11	Secondary Metabolism	Phenylpropanoids	Lignins	Catalyzes the conversion of caffeic acid to ferulic acid and of 5-hydroxyferulic acid to sinapic acid. The resulting products may subsequently be converted to the corresponding alcohols that are incorporated into lignins.
LOC18040304	disease resistance protein At4g27190	-10.571	1.30164	1.1578e-16	1.5491e-15	Stress Responses	Plant defense	NA	NB-ARC domain-containing disease resistance protein.
LOC18055028	endoribonuclease YBEY, chloroplastic	-10.5553	2.99757	1.01581e-12	1.0652e-11	Development	Chloroplast	NA	Endoribonuclease required for chloroplast ribosomal RNA (rRNA) processing and essential for normal growth and development. May be involved in maturation of both the 5' and 3' ends of 16S, 23S, and 4.5S rRNAs. Cleaves chloroplast rRNAs, mRNAs and tRNAs in vitro.
LOC18033773	shikimate O-hydroxycinnamoyltransferase	-10.5484	2.99377	8.3598e-13	8.82276e-12	Secondary Metabolism	Phenylpropanoids	Lignins	Acyltransferase involved in the biosynthesis of lignin (PubMed:15161961, PubMed:26858288). Accepts caffeoyl-CoA and p-coumaroyl-CoA as substrates and transfers the acyl group on both shikimate and quinate acceptors (PubMed:15161961).
LOC112099095	uncharacterized LOC112099095	-10.5192	3.00571	2.99976e-12	3.07295e-11	NA	Uncharacterized process	NA	Uncharacterized process
LOC18049487	uncharacterized LOC18049487	-10.5143	2.99984	2.09812e-12	2.16809e-11	NA	Uncharacterized process	NA	Uncharacterized process
LOC18037669	G-type lectin S-receptor-like serine/threonine-protein kinase CES101	-10.5075	2.9757	9.18799e-13	9.66806e-12	Development	Chloroplast	NA	Promotes the expression of genes involved in photosynthesis at least in dedifferentiated calli.
LOC18044457	BTB/POZ domain-containing protein At3g56230	-10.5036	0.806296	1.18149e-30	3.05967e-29	Gene Expression	Ubiquitination	Proteasome	May act as a substrate-specific adapter of an E3 ubiquitin-protein ligase complex (CUL3-RBX1-BTB) which mediates the ubiquitination and subsequent proteasomal degradation of target proteins.
LOC18039773	probable LRR receptor-like serine/threonine-protein kinase At3g47570	-10.4977	2.99584	2.21945e-12	2.28792e-11	Signalling	Receptors, kinases, transduction	NA	probable LRR receptor-like serine/threonine-protein kinase
LOC18037281	uncharacterized LOC18037281	10.4927	3.1103	3.78935e-11	3.65326e-10	NA	Uncharacterized process	NA	Uncharacterized process
LOC18050418	protein STRICTOSIDINE SYNTHASE-LIKE 4	-10.4903	2.99615	3.73651e-12	3.79843e-11	NA	Uncharacterized process	NA	Uncharacterized process
LOC18043334	cation/H(+) antiporter 15	-10.4746	2.99206	2.0592e-12	2.12994e-11	Regulation and Transport	Transport	Cation/H+ antiporter	May operate as a cation/H+ antiporter.
LOC18031543	uncharacterized LOC18031543	-10.4395	2.97248	1.73829e-12	1.8059e-11	NA	Uncharacterized process	NA	Uncharacterized process
LOC112096183	uncharacterized LOC112096183	-10.4167	2.98027	1.91991e-12	1.9907e-11	NA	Uncharacterized process	NA	Uncharacterized process
LOC112098019	protein ALP1-like	10.4139	2.46824	2.32541e-13	2.55291e-12	Gene Expression	Nucleic acids processing	NA	Transposase-derived protein that may have nuclease activity.
LOC18031710	cyclic nucleotide-gated ion channel 1	10.4104	2.77416	5.53625e-12	5.56585e-11	Signalling	Membranes, RE, signalling	NA	Acts as cyclic nucleotide-gated ion channel. Can be activated by cyclic AMP which leads to an opening of the cation channel. May be responsible for cAMP-induced calcium entry in cells and thus should be involved in the calcium signal transduction. Could transport K+, Na+ and Pb2+.
LOC18054044	6-hydroxynicotinate 3-monooxygenase	10.3889	0.56175	2.5776e-62	1.68311e-60	Secondary Metabolism	Alkaloids	Nicotine	Flavin-dependent monooxygenase (FMO) that catalyzes the decarboxylative hydroxylation of 6-hydroxynicotinic acid (6-HNA) to 2,5-dihydroxypyridine (2,5-DHP) with concomitant oxidation of NADH, a step in the aerobic nicotinate degradation pathway. Uses NADH in preference to NADPH as an electron donor.
LOC112096719	2-hydroxyisoflavanone dehydratase-like	10.3636	0.550707	1.14811e-65	7.98687e-64	Secondary Metabolism	Flavonoids	Isoflavones	Dehydratase that mediates the biosynthesis of isoflavonoids. Can use both 4'-hydroxylated and 4'-methoxylated 2-hydroxyisoflavanones as substrates. Has also a slight carboxylesterase activity toward p-nitrophenyl butyrate.
LOC112096298	pre-mRNA-splicing factor CWC21-like	-10.3506	2.97203	2.59483e-12	2.66584e-11	Gene Expression	Transcription	Post-transcription	Involved in pre-mRNA splicing. May function at or prior to the first catalytic step of splicing at the catalytic center of the spliceosome, together with ISY1. May do so by stabilizing the catalytic center or the position of the RNA substrate.
LOC18054362	LRR receptor-like serine/threonine-protein kinase	-10.3475	2.95059	2.49676e-12	2.56633e-11	Signalling	Receptors, kinases, transduction	NA	LRR receptor-like serine/threonine-protein kinase
LOC18032149	early light-induced protein 1, chloroplastic	-10.3366	2.97243	3.24606e-12	3.31569e-11	Development	Chloroplast	Chlorophyll	Prevents excess accumulation of free chlorophyll by inhibiting the entire chlorophyll biosynthesis pathway (e.g. 5-aminolevulinate synthesis and Mg-protoporphyrin IX chelatase activity), and hence prevent photooxidative stress (By similarity).Probably involved in the integration of pigments into the mature light-harvesting pigment-protein complexes. Light-harvesting chlorophyll (LHC) a/b-binding …
LOC112101176	uncharacterized LOC112101176	-10.3285	2.97283	3.63404e-12	3.69956e-11	NA	Uncharacterized process	NA	Uncharacterized process
LOC18052682	MLP-like protein 43	10.3219	3.09345	8.22677e-11	7.74197e-10	NA	Uncharacterized process	NA	Uncharacterized process
LOC18050786	AT-hook motif nuclear-localized protein 28	-10.3094	2.96555	2.86232e-12	2.9364e-11	Gene Expression	Transcription	NA	Transcription factor that specifically binds AT-rich DNA sequences related to the nuclear matrix attachment regions (MARs).
LOC18037099	sulfite exporter TauE/SafE family protein 3	-10.2776	0.850076	1.01991e-26	2.23362e-25	Gene Expression	Ubiquitination	Proteasome	protein ubiquitination
LOC18044991	uncharacterized LOC18044991	-10.2676	2.94657	3.10952e-12	3.1808e-11	NA	Uncharacterized process	NA	Uncharacterized process
LOC112101133	uncharacterized LOC112101133	-10.2508	2.96635	6.60619e-12	6.61769e-11	NA	Uncharacterized process	NA	Uncharacterized process
LOC18041724	uncharacterized LOC18041724	-10.2466	1.3023	1.10883e-15	1.39584e-14	NA	Uncharacterized process	NA	Uncharacterized process
LOC18050035	disease resistance-like protein DSC1	-10.2259	2.95005	4.25167e-12	4.31183e-11	Stress Responses	Plant defense	NA	TIR-NB-LRR receptor-like protein involved in plant defense. Acts as a trigger of hypersensitive response (HR). Functions as guard of CAMTA3, a negative regulator of immunity, during pathogen infection.
LOC18045508	protodermal factor 1	-10.2231	0.196377	0	0	Development	Organ development, differentiation	NA	May be involved in the regulation of meristem growth.
LOC112097791	uncharacterized LOC112097791	10.2036	3.07959	1.60693e-10	1.47443e-09	NA	Uncharacterized process	NA	Uncharacterized process
LOC18035232	uncharacterized LOC18035232	10.1891	2.39995	3.27832e-13	3.57508e-12	NA	Uncharacterized process	NA	Uncharacterized process
LOC18036714	uncharacterized LOC18036714	-10.1818	2.96643	6.08818e-12	6.11028e-11	NA	Uncharacterized process	NA	Uncharacterized process
LOC18048780	protein SHORT-ROOT	10.1754	2.60056	1.39668e-11	1.37326e-10	Development	Organ development, differentiation	NA	Transcription factor required for quiescent center cells specification and maintenance of surrounding stem cells, and for the asymmetric cell division involved in radial pattern formation in roots. Essential for both cell division and cell specification. Regulates the radial organization of the shoot axial organs and is required for normal shoot gravitropism. Directly controls the transcription o…
LOC18048295	TMV resistance protein N	10.129	1.32357	6.20166e-15	7.48383e-14	Stress Responses	Plant defense	NA	Disease resistance protein
LOC112096169	auxin-induced protein 15A-like	-10.12	2.94869	1.08964e-11	1.07785e-10	Regulation and Transport	Hormonal regulation	Auxins	Response to auxin
LOC112099081	uncharacterized LOC112099081	10.0815	3.06931	3.33535e-10	2.96617e-09	NA	Uncharacterized process	NA	Uncharacterized process
LOC112096228	uncharacterized LOC112096228	10.0751	2.82336	4.61341e-11	4.41771e-10	NA	Uncharacterized process	NA	Uncharacterized process
LOC112096456	gamma-terpinene synthase, chloroplastic-like	-10.0607	0.752549	6.79127e-33	1.92754e-31	Development	Chloroplast	NA	Terpene synthase activity
LOC18054339	calcium-binding protein PBP1	-10.0386	2.94436	2.27685e-11	2.22022e-10	Signalling	Membranes, RE, signalling	NA	Potential calcium sensor that binds calcium in vitro
LOC18055479	seed lectin	-10.0233	2.97159	1.05413e-10	9.84179e-10	NA	Uncharacterized process	NA	Lectin that binds galactose.
LOC18031408	S-type anion channel SLAH2	10.0185	1.63386	5.88116e-10	5.11615e-09	Regulation and Transport	Transport		Slow, weak voltage-dependent S-type anion efflux channel involved in maintenance of anion homeostasis.
LOC18040265	uncharacterized LOC18040265	-9.98344	2.93797	2.91805e-11	2.8312e-10	NA	Uncharacterized process	NA	Uncharacterized process
LOC18042961	uncharacterized LOC18042961	-9.98119	3.09425	2.36961e-08	1.8396e-07	NA	Uncharacterized process	NA	Uncharacterized process
LOC112097652	uncharacterized LOC112097652	-9.97921	0.970936	4.11717e-19	6.35549e-18	NA	Uncharacterized process	NA	Uncharacterized process
LOC18036496	probably inactive leucine-rich repeat receptor-like protein kinase At2g25790	-9.97722	2.92847	1.73261e-11	1.69651e-10	NA	Uncharacterized process	NA	Uncharacterized process
LOC18031442	wall-associated receptor kinase 2	-9.96178	1.30782	1.08546e-14	1.29302e-13	Cellullar Growth	Cell expansion	NA	Serine/threonine-protein kinase that may function as a signaling receptor of extracellular matrix component. Binding to pectin may have significance in the control of cell expansion, morphogenesis and development.
LOC18042589	uncharacterized LOC18042589	-9.91396	2.95703	1.37646e-10	1.27118e-09	NA	Uncharacterized process	NA	Uncharacterized process
LOC18045144	uncharacterized LOC18045144	-9.89496	2.92769	4.63256e-11	4.43205e-10	NA	Uncharacterized process	NA	Uncharacterized process
LOC18054024	protein CUP-SHAPED COTYLEDON 2	-9.89342	2.92675	7.7747e-11	7.32625e-10	Development	Seed, embryo development	NA	Transcription activator of STM and KNAT6. Involved in molecular mechanisms regulating shoot apical meristem (SAM) formation during embryogenesis and organ separation. Required for the fusion of septa of gynoecia along the length of the ovaries. Activates the shoot formation in callus in a STM-dependent manner. Controls leaf margin development and required for leaf serration. Involved in axillary …
LOC18050780	uncharacterized LOC18050780	9.88428	3.05673	1.30679e-09	1.10916e-08	NA	Uncharacterized process	NA	Uncharacterized process
LOC112100324	uncharacterized LOC112100324	-9.86485	1.29754	1.27802e-14	1.51645e-13	NA	Uncharacterized process	NA	Uncharacterized process
LOC18038022	putative FBD-associated F-box protein At5g56440	-9.84395	2.91793	4.71389e-11	4.50784e-10	NA	Uncharacterized process	NA	Uncharacterized process
LOC18045035	protein disulfide-isomerase C17H9.14c	-9.84003	2.92364	6.62532e-11	6.2793e-10	Signalling	Membranes, RE, signalling	NA	Participates in the folding of proteins containing disulfide bonds, may be involved in glycosylation, prolyl hydroxylation and triglyceride transfer.
LOC18033164	putative F-box protein PP2-B12	9.78859	2.54438	5.34638e-11	5.09438e-10	Signalling	Receptors, kinases, transduction	NA	Putative F-box protein
LOC112096859	mitochondrial carrier protein MTM1-like	-9.7854	0.969603	2.19036e-18	3.25602e-17	NA	Uncharacterized process	NA	Involved in the mitochondrial activation of MSD1 by specifically facilitating insertion of the essential manganese cofactor. Has the ability to activate iron regulon in an iron-dependent manner.
LOC18037094	uncharacterized LOC18037094	-9.75881	2.90564	6.18014e-11	5.86259e-10	NA	Uncharacterized process	NA	Uncharacterized process
LOC112099690	2-oxoglutarate-dependent dioxygenase mpl2-like	9.73455	0.82769	5.10491e-25	1.0469e-23	NA	Mycotoxin biosynthesis	NA	mpl2=2-oxoglutarate-dependent dioxygenase; part of the gene cluster that mediates the biosynthesis of the mycotoxin citrinin, a hepato-nephrotoxic compound to humans due to inhibition of respiration complex III (PubMed:17586673, PubMed:19012408, PubMed:28238725, PubMed:19111642, PubMed:27913218).The pathway begins with the synthesis of a keto-aldehyde intermediate by the citrinin PKS (pksCT) from…
LOC18042779	cytochrome P450 CYP82D47	9.70496	0.829557	7.54372e-25	1.53815e-23	Stress Responses	Redox	Oxidoreductases	Probable heme-thiolate monooxygenase.
LOC112100964	uncharacterized LOC112100964	9.68784	2.44816	2.04327e-11	1.99702e-10	NA	Uncharacterized process	NA	Uncharacterized process
LOC18039952	tropinone reductase-like 1	9.65567	2.54759	2.98981e-11	2.8995e-10	Secondary Metabolism	Alkaloids	Tropane	Catalyzes the stereospecific reduction of tropinone to tropine.
LOC112100009	beta-glucosidase 11-like	9.6184	1.26087	1.63522e-12	1.70131e-11	Primary Metabolism	Sugar metabolism	NA	Hydrolysis of terminal, non-reducing beta-D-glucosyl residues with release of beta-D-glucose. EC:3.2.1.22
LOC18040529	BAHD acyltransferase BIA1	9.60371	1.3334	4.54378e-13	4.89492e-12	Regulation and Transport	Hormonal regulation	Brassinosteroids	Monitors brassinosteroids (BR) responses and homeostasis, particularly in the root and hypocotyl in darkness (PubMed:22956280, PubMed:22544867). Promotes flavonoid biosynthesis (PubMed:22956280).
LOC18040371	sugar transporter ERD6-like 18	9.5966	2.38605	2.30755e-11	2.24913e-10	Regulation and Transport	Transport	Sugars	Sugar transporter.
LOC18048704	expansin-like B1	-9.53326	1.30614	1.76426e-13	1.95501e-12	Cellullar Growth	Cell wall	NA	May cause loosening and extension of plant cell walls by disrupting non-covalent bonding between cellulose microfibrils and matrix glucans. No enzymatic activity has been found. May be required for rapid internodal elongation in deepwater rice during submergence
LOC18037635	protein DETOXIFICATION 27	-9.51588	0.805697	5.73307e-25	1.17233e-23	Regulation and Transport	Transport	Xenobiotics	DTX27. Xenobiotic transmembrane transporter activity.
LOC18036830	probable disease resistance protein At1g61300	-9.51401	1.29716	1.3447e-13	1.50577e-12	Stress Responses	Plant defense	NA	Probably disease resistance protein
LOC18048915	protein HOTHEAD	9.48566	0.498513	4.08674e-64	2.76173e-62	Development	Flowering	NA	Involved in regulating post-genital organ fusion. EDA17, EMBRYO SAC DEVELOPMENT ARREST 17, HOTHEAD, HTH Probable FAD-dependent enzyme. Required to limit cellular interactions between contacting epidermal cells during floral development.
LOC18050960	non-specific lipid-transfer protein	-9.45154	2.92775	5.00815e-09	4.05143e-08	NA	Uncharacterized process	NA	Uncharacterized process
LOC18052679	MLP-like protein 43	9.42408	3.25169	0.000366494	0.00194941	NA	Uncharacterized process	NA	Uncharacterized process
LOC18038096	GDSL esterase/lipase At1g09390	-9.41617	1.30351	3.43515e-13	3.73845e-12	NA	Uncharacterized process	NA	Lipid catabolic process
LOC18034899	protein TOPLESS	9.41272	0.990203	2.00252e-16	2.63459e-15	Development	Seed, embryo development	NA	Transcriptional corepressor. May repress the expression of root-promoting genes in the top half of the embryo to allow proper differentiation of the shoot pole during the transition stage of embryogenesis. Regulates the expression of PLT1 and PLT2. Negative regulator of jasmonate responses. Negative regulator of auxin responses. Negative regulator of multiple floral organ identity genes (PubMed:2…
LOC18043148	uncharacterized LOC18043148	-9.38618	2.90759	3.14016e-09	2.58987e-08	NA	Uncharacterized process	NA	Uncharacterized process
LOC18053044	beta-glucosidase 24	9.36079	1.34606	1.84751e-12	1.9175e-11	Primary Metabolism	Sugar metabolism	NA	Hydrolysis of terminal, non-reducing beta-D-glucosyl residues with release of beta-D-glucose. EC:3.2.1.23
LOC18041202	photosystem I chlorophyll a/b-binding protein 5, chloroplastic	-9.33983	1.30177	4.79869e-13	5.15907e-12	Development	Chloroplast	Photosynthesis	Photosynthesis, chloroplast
LOC18032752	uncharacterized LOC18032752	-9.3315	0.810981	9.10991e-24	1.76614e-22	NA	Uncharacterized process	NA	Uncharacterized process
LOC112096188	shikimate O-hydroxycinnamoyltransferase-like	-9.29291	1.29091	5.23052e-13	5.60071e-12	Secondary Metabolism	Phenylpropanoids	Lignins	Auxin homeostasis. Cell wall organization. Lignin biosynthetic process. Positive regulation of flavonoid biosynthetic process
LOC18053327	uncharacterized protein At4g04980	-9.28106	1.29633	5.97282e-13	6.36354e-12	NA	Uncharacterized process	NA	Uncharacterized process
LOC18052680	protein PLANT CADMIUM RESISTANCE 2	9.2213	1.33114	4.50157e-12	4.55225e-11	Regulation and Transport	Transport	Zinc	Zinc transporter acting in both zinc extrusion and long-distance zinc transport. Involved in the loading of zinc into the xyleme and in the detoxification of excess zinc at the epidermal cells. Acts independently from the zinc transporters HMA2 and HMA4. May be also involved in cadmium resistance.
LOC18035157	geraniol 8-hydroxylase	9.21272	3.1866	0.000403608	0.00213775	Secondary Metabolism	Alkaloids	Vinblastine	Hydroxylase involved in the biosynthesis of hydroxygeraniol, a precursor of the terpenoid indole alkaloids such as vinblastine and vincristine. Also able to hydroxylate in vitro nerol and to catalyze 3'-hydroxylation of the flavanone naringenin to form eriodictyol. No activity with apigenin, kaempferol, p-coumaric acid and ferulic acid as substrates.
LOC112101210	uncharacterized LOC112101210	-9.19653	0.982439	6.51833e-16	8.31371e-15	NA	Uncharacterized process	NA	Uncharacterized process
LOC18053836	uncharacterized LOC18053836	9.17609	1.33828	5.29788e-12	5.33977e-11	NA	Uncharacterized process	NA	Uncharacterized process
LOC18033356	UDP-glycosyltransferase 88B1	-9.17406	0.34525	7.37226e-123	1.58518e-120	Secondary Metabolism	Terpenoids	Diterpenoids	May glycosylate diterpenes or flavonols in leaves.
LOC112095800	uncharacterized LOC112095800	-9.17229	2.8602	3.02063e-09	2.49806e-08	NA	Uncharacterized process	NA	Uncharacterized process
LOC18035878	uncharacterized LOC18035878	-9.16556	1.29097	1.00195e-12	1.05118e-11	NA	Uncharacterized process	NA	Uncharacterized process
LOC112096258	uncharacterized LOC112096258	-9.12055	0.816456	2.00782e-22	3.68452e-21	NA	Uncharacterized process	NA	Uncharacterized process
LOC112101597	uncharacterized LOC112101597	9.11002	0.950695	4.84565e-16	6.22131e-15	NA	Uncharacterized process	NA	Uncharacterized process
LOC112100768	uncharacterized LOC112100768	-9.1022	0.636033	3.49497e-36	1.07822e-34	NA	Uncharacterized process	NA	Uncharacterized process
LOC18032506	UPF0481 protein At3g47200	9.07386	0.822677	1.02572e-21	1.81349e-20	NA	Uncharacterized process	NA	Uncharacterized process
LOC112101114	uncharacterized LOC112101114	-8.97828	0.811315	6.46768e-22	1.15404e-20	NA	Uncharacterized process	NA	Uncharacterized process
LOC18049781	E3 ubiquitin-protein ligase MARCH11	8.95077	0.825328	3.53097e-21	6.08614e-20	Gene Expression	Ubiquitination	Proteasome	E3 ubiquitin-protein ligase that mediates polyubiquitination of CD4. E3 ubiquitin ligases accept ubiquitin from an E2 ubiquitin-conjugating enzyme in the form of a thioester and then directly transfer the ubiquitin to targeted substrates. May play a role in ubuquitin-dependent protein sorting in developmenting spermatids.
LOC18034902	17.3 kDa class I heat shock protein	-8.92669	0.585241	6.94532e-41	2.51437e-39	Stress Responses	Abiotic stress	NA	Heat shock protein
LOC18046561	PE-PGRS family protein PE_PGRS33	-8.91278	0.203773	0	0	Signalling	Receptors, kinases, transduction	NA	Induces TNF-alpha release through human Toll-like receptor 2 (TLR2) signaling pathway, leading to macrophage apoptosis (PubMed:17095513, PubMed:17223373, PubMed:24106104).The signaling pathway involves TLR2-dependent activation of the mitogen-activated protein kinase kinase kinase 5 (ASK1), which activates the p38 and JNK MAPKs, leading to enhanced expression of TNF-alpha and tumor necrosis facto…
LOC112101121	glucan endo-1,3-beta-glucosidase 11-like	8.90597	1.25508	4.46472e-12	4.51713e-11	Stress Responses	Plant defense	NA	Disease resistance protein
LOC112100269	uncharacterized LOC112100269	8.89658	1.26997	7.4882e-12	7.48012e-11	NA	Uncharacterized process	NA	Uncharacterized process
LOC18037346	LRR receptor-like serine/threonine-protein kinase HSL2	8.89365	1.3163	1.61284e-11	1.58068e-10	Development	Flowering	NA	Receptor-like serine/threonine-kinase acting on substrates that controls floral organ abscission. Regulated by the 'INFLORESCENCE DEFICIENT IN ABSCISSION' (IDA) family of ligands.
LOC18037251	probable disease resistance protein At5g43730	-8.88411	0.635945	2.1741e-34	6.42778e-33	Stress Responses	Plant defense	NA	Probably disease resistance protein
LOC112100297	uncharacterized LOC112100297	8.8834	1.67452	7.95345e-08	5.95934e-07	NA	Uncharacterized process	NA	Uncharacterized process
LOC18034500	uncharacterized LOC18034500	-8.86861	1.29386	7.02537e-12	7.02768e-11	NA	Uncharacterized process	NA	Uncharacterized process
LOC18053707	lectin-like protein At3g16530	8.8418	0.404634	8.8144e-84	8.97761e-82	Stress Responses	Plant defense	NA	response to chitin
LOC18049402	germin-like protein subfamily 1 member 17	8.81386	0.902193	3.30161e-18	4.86376e-17	Stress Responses	Plant defense	NA	May play a role in plant defense. Probably has no oxalate oxidase activity even if the active site is conserved.
LOC18053209	indole-3-acetic acid-amido synthetase GH3.6	-8.75566	0.973227	1.3221e-14	1.56789e-13	Regulation and Transport	Hormonal regulation	Auxins	Catalyzes the synthesis of indole-3-acetic acid (IAA)-amino acid conjugates, providing a mechanism for the plant to cope with the presence of excess auxin. Strongly reactive with Glu, Gln, Trp, Asp, Ala, Leu, Phe, Gly, Tyr, Met, Ile and Val. Little or no product formation with His, Ser, Thr, Arg, Lys, or Cys. Also active on pyruvic and butyric acid analogs of IAA, PAA and the synthetic auxin naph…
LOC18035713	cysteine proteinase COT44	-8.73772	0.312639	1.14226e-134	2.89467e-132	Development	Organ development, differentiation	NA	May function in an early event in cortical cell differentiation. Expressed maximally during postgerminative growth.
LOC18038632	protein HEADING DATE 3A	8.73237	1.84529	3.4612e-06	2.26424e-05	Development	Flowering	NA	Probable mobile flower-promoting signal (florigen) that moves from the leaf to the shoot apical meristem (SAM) and induces flowering. Promotes the transition from vegetative growth to flowering downstream of HD1 and EHD1 under short day (SD) conditions. Acts upstream of MADS14 and MADS15.
LOC18046345	auxin-induced protein 22D	-8.72608	0.973272	1.46693e-14	1.73673e-13	Regulation and Transport	Hormonal regulation	Auxins	Aux/IAA proteins are short-lived transcriptional factors that function as repressors of early auxin response genes at low auxin concentrations. Repression is thought to result from the interaction with auxin response factors (ARFs), proteins that bind to the auxin-responsive promoter element (AuxRE). Formation of heterodimers with ARF proteins may alter their ability to modulate early auxin respo…
LOC18036888	probable disease resistance protein At4g27220	-8.72579	0.965452	1.0726e-14	1.27842e-13	Stress Responses	Plant defense	NA	Probably disease resistance protein
LOC18052879	heavy metal-associated isoprenylated plant protein 6	8.71971	1.34231	8.98502e-11	8.43316e-10	Stress Responses	Abiotic stress	Hypoxia	Cellular response to hypoxia. Heavy-metal-binding protein. Involved in the maintenance of heavy metal homeostasis and/or in detoxification.
LOC18035407	caffeic acid 3-O-methyltransferase	8.69295	1.32545	7.56659e-11	7.14596e-10	Secondary Metabolism	Phenylpropanoids	Lignins	Catalyzes the conversion of caffeic acid to ferulic acid and of 5-hydroxyferulic acid to sinapic acid. The resulting products may subsequently be converted to the corresponding alcohols that are incorporated into lignins.
LOC112097725	LRR receptor-like serine/threonine-protein kinase GSO1	8.68107	1.29803	4.37777e-11	4.19773e-10	Cellullar Growth	Cell division	NA	Together with GSO2, receptor-like serine/threonine-kinase required during the development of the epidermal surface in embryos and cotyledons (PubMed:18088309).In coordination with GSO2, regulates root growth through control of cell division and cell fate specification. Controls seedling root growth by modulating sucrose response after germination (PubMed:24123341).Receptor of the peptide hormones…
LOC18043419	probable LRR receptor-like serine/threonine-protein kinase At3g47570	-8.65253	1.31586	5.75957e-11	5.48073e-10	Signalling	Receptors, kinases, transduction	NA	probable LRR receptor-like serine/threonine-protein kinase
LOC112098473	uncharacterized LOC112098473	8.63112	0.42736	1.94278e-70	1.53739e-68	NA	Uncharacterized process	NA	Uncharacterized process
LOC18046422	transcription factor MYB52	-8.61792	0.981543	4.95711e-14	5.6824e-13	Regulation and Transport	Hormonal regulation	Abscisic acid	Transcription factor that confers sensitivity to abscisic acid (ABA) and salt, but tolerance to drought (PubMed:21399993).Regulates secondary cell wall (SCW) biosynthesis, especially in interfascicular and xylary fibers (PubMed:18952777, PubMed:23781226).
LOC18048328	uncharacterized protein At4g00950	8.58505	0.738011	3.53205e-24	6.96819e-23	NA	Uncharacterized process	NA	Uncharacterized process
LOC18033276	major allergen Pru ar 1	8.5768	1.57679	1.41008e-07	1.0372e-06	NA	Uncharacterized process	NA	Uncharacterized process
LOC18041395	TMV resistance protein N	8.5618	0.551594	7.27144e-42	2.72034e-40	Stress Responses	Plant defense	NA	Disease resistance protein
LOC18038358	uncharacterized LOC18038358	8.54657	0.590249	1.1743e-36	3.69273e-35	NA	Uncharacterized process	NA	Uncharacterized process
LOC18035128	cyclin-D4-1	-8.53235	0.480108	9.77519e-55	5.26796e-53	Cellullar Growth	Cell division	Cell cycle	Cyclin-dependent protein serine/threonine kinase regulator activity. Cell division
LOC18046257	21 kDa seed protein	8.52073	1.34076	3.37835e-10	3.0002e-09	NA	Uncharacterized process	NA	Uncharacterized process
LOC18037489	histidine kinase 1	-8.51556	0.342083	1.42076e-106	2.30869e-104	Regulation and Transport	Hormonal regulation	Abscisic acid	Functions as an osmosensor histidine kinase that detects water stress and transmits the stress signal to a downstream MAPK cascade. This protein undergoes an ATP-dependent autophosphorylation at a conserved histidine residue in the kinase core, and a phosphoryl group is then transferred to a conserved aspartate residue in the receiver domain. Positive regulator of drought and salt stress response…
LOC18039381	uncharacterized acetyltransferase At3g50280	8.51476	0.995641	2.06048e-13	2.27379e-12	NA	Uncharacterized process	NA	Uncharacterized process
LOC112098314	uncharacterized LOC112098314	8.49729	0.81032	2.11008e-19	3.33214e-18	NA	Uncharacterized process	NA	Uncharacterized process
LOC18045371	heat shock 70 kDa protein 18	-8.49489	0.97904	1.19787e-13	1.34347e-12	Stress Responses	Abiotic stress	NA	Heat shock protein
LOC18049103	uncharacterized LOC18049103	-8.41956	1.32044	2.22703e-10	2.02075e-09	NA	Uncharacterized process	NA	Uncharacterized process
LOC18031372	cyclic nucleotide-gated ion channel 1	8.37884	0.854066	1.33781e-17	1.9087e-16	Signalling	Membranes, RE, signalling	NA	Acts as cyclic nucleotide-gated ion channel. Can be activated by cyclic AMP which leads to an opening of the cation channel. May be responsible for cAMP-induced calcium entry in cells and thus should be involved in the calcium signal transduction. Could transport K+, Na+ and Pb2+.
LOC18051386	uncharacterized LOC18051386	-8.34783	1.29553	1.51701e-10	1.39735e-09	NA	Uncharacterized process	NA	Uncharacterized process
LOC18031330	hexose carrier protein HEX6	-8.34616	1.30194	2.00952e-10	1.83041e-09	Regulation and Transport	Transport	Sugars	Active uptake of hexoses. Probable glucose/hydrogen symport
LOC112100750	uncharacterized LOC112100750	-8.33069	2.75733	7.8307e-08	5.87358e-07	NA	Uncharacterized process	NA	Uncharacterized process
LOC18039156	protein ABSCISIC ACID-INSENSITIVE 5	-8.32132	1.27654	1.18505e-10	1.10158e-09	Regulation and Transport	Hormonal regulation	Abscicic acid	Participates in ABA-regulated gene expression during seed development and subsequent vegetative stage by acting as the major mediator of ABA repression of growth. Binds to the embryo specification element and the ABA-responsive element (ABRE) of the Dc3 gene promoter and to the ABRE of the Em1 and Em6 genes promoters. Can also trans-activate its own promoter, suggesting that it is autoregulated. …
LOC18051202	probable LRR receptor-like serine/threonine-protein kinase At3g47570	-8.30011	0.646373	6.82648e-29	1.63828e-27	Signalling	Receptors, kinases, transduction	NA	probable LRR receptor-like serine/threonine-protein kinase
LOC18035053	uncharacterized LOC18035053	-8.27185	0.829488	7.2966e-18	1.0559e-16	NA	Uncharacterized process	NA	Uncharacterized process
LOC18036262	transcription factor WER	-8.27091	1.29744	2.51542e-10	2.26792e-09	Development	Organ development, differentiation	NA	Transcription activator, when associated with BHLH2/EGL3/MYC146 or BHLH12/MYC1. Involved in epidermal cell fate specification in roots and hypocotyl. Together with GL3 or BHLH2, promotes the formation of non-hair developing cells (atrichoblasts) et the N position in root epidermis. Regulates stomata spatial distribution in hypocotyls. Binds to the WER-binding sites (WBS) promoter regions and acti…
LOC18055487	lectin	-8.26594	1.04806	2.17829e-12	2.24766e-11	NA	Uncharacterized process	NA	Lectins are carbohydrate-binding proteins that are highly specific for sugar groups that are part of other molecules, so cause agglutination of particular cells or precipitation of glycoconjugates and polysaccharides.
LOC18045181	uncharacterized LOC18045181	8.22274	1.0065	2.09499e-12	2.16591e-11	NA	Uncharacterized process	NA	Uncharacterized process
LOC18033572	cyclic nucleotide-gated ion channel 1	-8.21208	1.29431	3.33584e-10	2.96617e-09	Signalling	Membranes, RE, signalling	NA	Acts as cyclic nucleotide-gated ion channel. Can be activated by cyclic AMP which leads to an opening of the cation channel. May be responsible for cAMP-induced calcium entry in cells and thus should be involved in the calcium signal transduction. Could transport K+, Na+ and Pb2+.
LOC18032262	short-chain dehydrogenase TIC 32, chloroplastic	8.16297	0.846163	6.08018e-17	8.29672e-16	Development	Chloroplast	NA	Involved in protein precursor import into chloroplasts. Part of the redox regulon consisting of TIC32, TIC 55 and TIC62. Has a NADPH-dependent dehydrogenase activity, but only after preincubation with lipids.
LOC18047430	36.4 kDa proline-rich protein	-8.15247	0.351609	6.44045e-92	8.06458e-90	NA	Uncharacterized process	NA	Uncharacterized process
LOC112097062	uncharacterized LOC112097062	-8.15043	1.29048	4.0758e-10	3.59559e-09	NA	Uncharacterized process	NA	Uncharacterized process
LOC18044330	uncharacterized LOC18044330	8.12341	0.740446	2.40884e-21	4.17905e-20	NA	Uncharacterized process	NA	Uncharacterized process
LOC18033435	protein STRICTOSIDINE SYNTHASE-LIKE 2	8.11977	1.0417	1.87975e-11	1.83889e-10	NA	Uncharacterized process	NA	Uncharacterized process
LOC18039966	sodium/hydrogen exchanger 6	-8.11347	0.714128	9.9112e-23	1.83461e-21	Regulation and Transport	Transport	Sodium	Electroneutral exchange of protons for Na+ and K+ across the early and recycling endosome membranes. Contributes to calcium homeostasis.
LOC18042762	magnesium transporter MRS2-3	8.11181	0.978159	2.49426e-12	2.56499e-11	Regulation and Transport	Transport	Magnesium	Magnesium transporter that may mediate the influx of magnesium.
LOC18040354	receptor-like protein 12	8.08856	0.766336	3.22828e-20	5.35206e-19	Cellullar Growth	Cell wall	Matrix	Involved in the perception of CLV3 and CLV3-like peptides, that act as extracellular signals regulating meristems maintenance.
LOC18036396	uncharacterized LOC18036396	-8.05	1.29265	7.4881e-10	6.47701e-09	NA	Uncharacterized process	NA	Uncharacterized process
LOC18034927	phosphatidylinositol/phosphatidylcholine transfer protein SFH3	-8.04547	0.996053	4.75104e-12	4.79315e-11	Regulation and Transport	Trafficking, vesicles	NA	Required for transport of secretory proteins from the Golgi complex. Catalyzes the transfer of phosphatidylinositol and phosphatidylcholine between membranes in vitro (By similarity).
LOC18049412	germin-like protein subfamily 1 member 17	8.03443	0.55364	3.13329e-36	9.69454e-35	Stress Responses	Plant defense	NA	May play a role in plant defense. Probably has no oxalate oxidase activity even if the active site is conserved.
LOC18053302	probable sulfate transporter 3.3	8.03111	0.394211	3.97652e-71	3.21857e-69	Regulation and Transport	Transport	Sulfate	H+/sulfate cotransporter that may play a role in the regulation of sulfate assimilation.
LOC18040575	copper transport protein ATX1	8.01662	0.215636	3.86849e-232	3.16725e-229	Regulation and Transport	Transport	Copper	Plays an important role in copper homeostasis by conferring tolerance to excess of copper and subclinical copper deficiency during vegetative stage. Can complement the yeast mutants atx1 and sod1.
LOC18031462	gamma-glutamyl hydrolase 1	-7.96404	0.828037	1.41594e-16	1.885e-15	Secondary Metabolism	Cofactors, vitamins	NA	Cleaves the polyglutamate sidechains of folate polyglutamates in the vacuole. Is important for polyglutamyl tail length determination before vacuolar exit. Plays a role in folate stability and intracellular folate content.
LOC18052412	calcium-binding protein PBP1	-7.93684	1.30424	1.93674e-09	1.62376e-08	Signalling	Membranes, RE, signalling	NA	Potential calcium sensor that binds calcium in vitro
LOC18049794	uncharacterized LOC18049794	-7.92448	0.965485	3.6731e-12	3.73754e-11	NA	Uncharacterized process	NA	Uncharacterized process
LOC18041157	protein ANTHESIS POMOTING FACTOR 1	-7.91935	0.440775	2.99739e-55	1.64024e-53	Development	Flowering	NA	Component of a chromatin regulatory complex involved in regulating chromatin structure in the nucleus (By similarity).Promotes flowering under long days (LD) via the regulation of bolting (PubMed:27968983).
LOC18033833	proline-rich protein 4	7.90946	0.339523	5.92043e-93	7.50168e-91	NA	Uncharacterized process	NA	Uncharacterized process
LOC18043497	ABC transporter G family member 6	-7.88677	0.710861	1.43467e-21	2.51564e-20	Regulation and Transport	Transport	ABC	ABC transporter
LOC18043945	caffeic acid 3-O-methyltransferase	7.87345	0.664083	9.61622e-25	1.95325e-23	Secondary Metabolism	Phenylpropanoids	Lignins	Catalyzes the conversion of caffeic acid to ferulic acid and of 5-hydroxyferulic acid to sinapic acid. The resulting products may subsequently be converted to the corresponding alcohols that are incorporated into lignins.
LOC112101533	uncharacterized LOC112101533	-7.86002	0.962389	5.36673e-12	5.40405e-11	NA	Uncharacterized process	NA	Uncharacterized process
LOC18035085	UDP-glucose iridoid glucosyltransferase	-7.81578	0.971843	1.02205e-11	1.01239e-10	Secondary Metabolism	Alkaloids	Secologanin	Secologanin synthesis. Secologanin is a secoiridoid monoterpene synthesized from geranyl pyrophosphate in the mevalonate pathway. Secologanin then proceeds with dopamine or tryptamine to form ipecac and terpene indole alkaloids, respectively. This iridoid glucosyltransferase acting on a broad range of substrates, including both 7-deoxyloganetic acid and 7-deoxyloganetin, curcumin, genistein, lute…
LOC18036422	cytochrome P450 71A1	-7.79028	0.590632	3.556e-30	9.02223e-29	Secondary Metabolism	Phenylpropanoids	NA	Involved in the metabolism of compounds associated with the development of flavor in the ripening fruit process, possibly by acting as trans-cinnamic acid 4-hydrolase.
LOC18031421	cytochrome P450 76M5	7.77819	0.189092	4.65644e-282	6.19511e-279	NA	Phytoalexins	Diterpenoids	Enzyme of the diterpenoid metabolism involved in the biosynthesis of the oryzalexin class of phytoalexins. Hydroxylates ent-sandaracopimaradien.
LOC18053500	MLP-like protein 43	7.73887	0.341288	7.68563e-88	8.56565e-86	NA	Uncharacterized process	NA	Uncharacterized process
LOC112097790	putative disease resistance protein RGA1	7.7372	0.529709	1.17441e-36	3.69273e-35	Stress Responses	Plant defense	NA	Belongs to a four-gene family located at the same locus. Although the four genes are expressed in the resistant haplotype, only RGA2 confers the resistance to P.infestans. In the susceptible haplotype, RGA1 and RGA3 are likely to be pseudogenes created by deletions and mutations, while RGA2 contains also several modifications.
LOC18046702	uncharacterized LOC18046702	-7.73578	0.959459	1.08905e-11	1.07776e-10	NA	Uncharacterized process	NA	Uncharacterized process
LOC112096808	uncharacterized LOC112096808	7.73451	0.811634	5.51798e-16	7.06747e-15	NA	Uncharacterized process	NA	Uncharacterized process
LOC18054772	indole-3-acetic acid-amido synthetase GH3.6	-7.72401	0.98286	2.55294e-11	2.48035e-10	Regulation and Transport	Hormonal regulation	Auxins	Catalyzes the synthesis of indole-3-acetic acid (IAA)-amino acid conjugates, providing a mechanism for the plant to cope with the presence of excess auxin. Strongly reactive with Glu, Gln, Trp, Asp, Ala, Leu, Phe, Gly, Tyr, Met, Ile and Val. Little or no product formation with His, Ser, Thr, Arg, Lys, or Cys. Also active on pyruvic and butyric acid analogs of IAA, PAA and the synthetic auxin naph…
LOC18035398	aquaporin AQPAn.G	7.71836	0.35922	7.29858e-78	6.69677e-76	Regulation and Transport	Transport	Aquaporins	Forms a water-specific channel.
LOC18040405	NAD(P)H-quinone oxidoreductase subunit N, chloroplastic	-7.71156	1.29071	4.25781e-09	3.46601e-08	Development	Chloroplast	Photosynthesis	Photosynthesis, chloroplast
LOC18034558	pathogenesis-related protein PR-4	7.70918	0.16186	0	0	Stress Responses	Plant defense	NA	Disease resistance protein
LOC18037613	sodium/hydrogen exchanger 6	-7.67625	0.555573	7.88337e-33	2.22564e-31	Regulation and Transport	Transport	Sodium	Electroneutral exchange of protons for Na+ and K+ across the early and recycling endosome membranes. Contributes to calcium homeostasis.
LOC18047368	F-box/kelch-repeat protein At1g74510	-7.67613	0.964875	1.99723e-11	1.95292e-10	Signalling	Receptors, kinases, transduction	NA	F-box/kelch-repeat protein
LOC18048273	sulfate transporter 3.1	-7.6448	0.462869	2.82713e-46	1.19644e-44	Regulation and Transport	Transport	Sulfate	H+/sulfate cotransporter that may play a role in the regulation of sulfate assimilation.
LOC18046383	dirigent protein 5	7.63392	1.83979	2.7802e-05	0.000166945	NA	Lignan metabolism	NA	Dirigent proteins impart stereoselectivity on the phenoxy radical-coupling reaction, yielding optically active lignans from two molecules of coniferyl alcohol in the biosynthesis of lignans, flavonolignans, and alkaloids and thus plays a central role in plant secondary metabolism.
LOC18047048	transcription factor MYC2	-7.62746	0.466545	2.4215e-45	1.0009e-43	Regulation and Transport	Hormonal regulation	Abscicic acid	Transcriptional activator. Common transcription factor of light, abscisic acid (ABA), and jasmonic acid (JA) signaling pathways. With MYC3 and MYC4, controls additively subsets of JA-dependent responses. In cooperation with MYB2 is involved in the regulation of ABA-inducible genes under drought stress conditions. Can form complexes with all known glucosinolate-related MYBs to regulate glucosinola…
LOC18045329	GDSL esterase/lipase At1g29670	-7.62605	0.975586	4.13449e-11	3.97161e-10	NA	Uncharacterized process	NA	Lipid catabolic process
LOC18032722	uncharacterized LOC18032722	-7.5919	0.807011	1.2513e-15	1.56869e-14	NA	Uncharacterized process	NA	Uncharacterized process
LOC18050002	uncharacterized LOC18050002	7.58311	1.28903	1.32129e-08	1.04365e-07	NA	Uncharacterized process	NA	Uncharacterized process
LOC18039588	uncharacterized LOC18039588	-7.57838	0.564831	5.19254e-31	1.36968e-29	NA	Uncharacterized process	NA	Uncharacterized process
LOC18051888	probable zinc transporter 10	7.55399	0.52406	3.44387e-36	1.064e-34	Regulation and Transport	Transport	Zinc	Probably mediates zinc uptake from the rhizosphere.
LOC18053991	uncharacterized LOC18053991	-7.54344	0.407459	1.17577e-57	6.87598e-56	NA	Uncharacterized process	NA	Uncharacterized process
LOC112100244	uncharacterized LOC112100244	-7.53824	0.719878	2.77494e-19	4.34659e-18	NA	Uncharacterized process	NA	Uncharacterized process
LOC18035118	18.1 kDa class I heat shock protein	-7.53565	1.29707	1.22448e-08	9.68975e-08	Stress Responses	Abiotic stress	NA	Heat shock protein
LOC18048848	beta-glucosidase 11	7.53488	0.424701	1.22172e-54	6.56738e-53	Primary Metabolism	Sugar metabolism	NA	Hydrolysis of terminal, non-reducing beta-D-glucosyl residues with release of beta-D-glucose. EC:3.2.1.21
LOC112096490	probable carboxylesterase 12	7.53055	0.788425	1.45251e-16	1.93006e-15	NA	Uncharacterized process	NA	Carboxylesterase acting on esters with varying acyl chain length.
LOC112096708	uncharacterized LOC112096708	-7.50961	1.28358	9.634e-09	7.67511e-08	NA	Uncharacterized process	NA	Uncharacterized process
LOC18045752	receptor-like protein Cf-9	7.50311	2.29013	0.000199537	0.00109192	Stress Responses	Plant defense	NA	Involved in plant defense. Confers resistance to the fungal pathogen C.fulvum through recognition of the AVR9 elicitor protein.
LOC18037774	protein JINGUBANG	-7.49253	0.702065	9.89076e-20	1.59262e-18	Development	Gametophyte	Fertilization	Negative regulator of pollen germination (PubMed:27468890).Prevents pollination in moist environments by inhibiting jasmonic acid synthesis (PubMed:27468890).-Stabilizes pollen tube growth (PubMed:27468890).
LOC18054495	cytochrome b-c1 complex subunit 8	7.47292	0.294772	6.66438e-107	1.09127e-104	Regulation and Transport	Transport	Electron. Mitocondrial	Component of the ubiquinol-cytochrome c oxidoreductase, a multisubunit transmembrane complex that is part of the mitochondrial electron transport chain which drives oxidative phosphorylation. The respiratory chain contains 3 multisubunit complexes succinate dehydrogenase (complex II, CII), ubiquinol-cytochrome c oxidoreductase (cytochrome b-c1 complex, complex III, CIII) and cytochrome c oxidase …
LOC18036271	AP2-like ethylene-responsive transcription factor AIL1	-7.47224	0.646823	3.97086e-23	7.52027e-22	Regulation and Transport	Hormonal regulation	Ethylene	Probably acts as a transcriptional activator. Binds to the GCC-box pathogenesis-related promoter element. May be involved in the regulation of gene expression by stress factors and by components of stress signal transduction pathways (By similarity).
LOC18046196	ethylene-responsive transcription factor ERF022	7.46036	1.01675	5.6691e-10	4.93571e-09	Regulation and Transport	Hormonal regulation	Ethylene	Acts as a transcriptional activator. Binds to the GCC-box pathogenesis-related promoter element. Involved in the regulation of gene expression by stress factors and by components of stress signal transduction pathways.
LOC18033593	nucleobase-ascorbate transporter 4	-7.41992	0.4668	1.07161e-42	4.09542e-41	Regulation and Transport	Transport	Ascorbate	transmembrane transporter activity
LOC18047284	disease resistance-like protein DSC1	-7.41925	0.986327	2.1781e-10	1.97719e-09	Stress Responses	Plant defense	NA	TIR-NB-LRR receptor-like protein involved in plant defense. Acts as a trigger of hypersensitive response (HR). Functions as guard of CAMTA3, a negative regulator of immunity, during pathogen infection.
LOC18034460	protodermal factor 1	-7.41892	0.365885	1.12931e-68	8.5247e-67	Development	Organ development, differentiation	NA	May be involved in the regulation of meristem growth.
LOC18055959	probable protein ABIL4	-7.41573	0.967923	1.15635e-10	1.07679e-09	Cellullar Growth	Cytoskeleton	NA	Involved in regulation of actin and microtubule organization. Part of a WAVE complex that activates the Arp2/3 complex (By similarity).
LOC18051359	cold and drought-regulated protein CORA	-7.40079	0.718657	1.29262e-18	1.94323e-17	Stress Responses	Abiotic stress	Cold	May be involved in resistance of the plant to environmental stress.
LOC18037492	probable disease resistance protein At5g63020	-7.39597	0.545065	2.19105e-31	5.88157e-30	Stress Responses	Plant defense	NA	Other names: SUPPRESSORS OF TOPP4-1, SUT1. Nucleotide binding leucine rich repeat protein of the C-NB-LRR (CNL) type. Involved in TOPP4 mediated immune response.
LOC112100147	2-alkenal reductase (NADP(+)-dependent)-like	-7.39209	0.521148	3.35404e-34	9.86154e-33	Stress Responses	Redox	Oxidoreductases	Reduces the C=C double bonds of alpha, beta unsaturated enones, but has no activity on enones with an endocyclic C=C double-bond. Shows a high specificity for NADPH as the hybrid donor. Substrates are 1-nitrocyclohexene, 2-methylpentenal, trans-cinnamaldehyde, methyl-trans-2-methylcinnamaldehyde, trans-2-nonenal and 1-octen-3-one. Reduced activity with aplha-methyl transcinnamaldehyde, 1-cyclohex…
LOC18034045	gamma-glutamyl hydrolase 1	7.38822	0.770871	1.50912e-16	1.99905e-15	Secondary Metabolism	Cofactors, vitamins	NA	Cleaves the polyglutamate sidechains of folate polyglutamates in the vacuole. Is important for polyglutamyl tail length determination before vacuolar exit. Plays a role in folate stability and intracellular folate content.
LOC18035182	receptor-like protein EIX2	7.38655	1.01362	6.03362e-10	5.24449e-09	Stress Responses	Plant defense	NA	Involved in plant defense. Confers resistance to the fungal pathogen T.viride through recognition of the EIX elicitor protein.
LOC18036378	boron transporter 4	-7.38031	1.00462	4.49761e-10	3.94072e-09	Regulation and Transport	Transport	Boron	Efflux-type boron transporter polarly localized in roots. Boron is essential for maintaining the integrity of plants cell walls.
LOC18043085	isoflavone 2'-hydroxylase	7.37979	0.883353	6.17242e-13	6.56633e-12	Secondary Metabolism	Flavonoids	Isoflavones	Catalyzes the hydroxylation of isoflavones, daidzein and formononetin, to yield 2'-hydroxyisoflavones, 2'-hydroxydaidzein, and 2'-hydroxyformononetin, respectively.
LOC18054751	G-type lectin S-receptor-like serine/threonine-protein kinase At4g27290	7.36739	0.285016	2.94212e-110	5.09178e-108	Signalling	Receptors, kinases, transduction	NA	G-type lectin S-receptor-like serine/threonine-protein kinase
LOC18046891	14 kDa proline-rich protein DC2.15	-7.3554	0.972633	2.11421e-10	1.92084e-09	Regulation and Transport	Hormonal regulation	Auxins	May be connected with the initiation of embryogenesis or with the metabolic changes produced by the removal of auxins.
LOC112097624	protein disulfide isomerase-like 5-4	7.33781	0.886892	9.71392e-13	1.02063e-11	Signalling	Membranes, RE, signalling	NA	Acts as a protein-folding catalyst that interacts with nascent polypeptides to catalyze the formation, isomerization, and reduction or oxidation of disulfide bonds. May play a role in storage protein biogenesis (By similarity).
LOC18052711	putative receptor-like protein kinase At4g00960	-7.33364	0.594919	5.1736e-26	1.1002e-24	Signalling	Receptors, kinases, transduction	NA	Putative receptor-like protein kinase
LOC18045744	beta-D-glucosyl crocetin beta-1,6-glucosyltransferase	7.32118	0.239861	1.12275e-152	3.67691e-150	Secondary Metabolism	Terpenoids	Carotenoids	Glucosyltransferase catalyzing the beta 1-6 glucosylation of the sugar moiety of crocetin glucosyl esters to produce crocetin gentiobiosyl esters. Weak activity toward curcumin glucosides, but no activity with flavonoid glucosides, coumarin glucosides, 4-nitrophenyl glucoside or crocetin. Involved with UGT75L6 in sequential glycosylation of crocetin to crocin (bis(beta-D-gentiobiosyl) crocetin).C…
LOC18044125	WEB family protein At2g40480	-7.31976	0.24822	2.80089e-143	7.84506e-141	Development	Chloroplast	NA	Chloroplast accumulation movement
LOC112100214	uncharacterized LOC112100214	-7.31091	0.987067	4.20287e-10	3.70308e-09	NA	Uncharacterized process	NA	Uncharacterized process
LOC112099053	putative receptor-like protein kinase At3g47110	7.28773	1.02534	1.89249e-09	1.58792e-08	Signalling	Receptors, kinases, transduction	NA	Putative receptor-like protein kinase
LOC18034444	wound-induced protein WIN2	7.28218	1.07016	4.54075e-09	3.68646e-08	Stress Responses	Plant defense	NA	Defense response to bacterium/fungus
LOC18037494	uncharacterized LOC18037494	-7.28213	0.810844	2.85558e-14	3.30542e-13	NA	Uncharacterized process	NA	Uncharacterized process
LOC112100123	uncharacterized LOC112100123	7.27432	0.697883	4.32135e-19	6.65619e-18	NA	Uncharacterized process	NA	Uncharacterized process
LOC112095854	shikimate O-hydroxycinnamoyltransferase-like	7.27308	0.769535	4.56313e-16	5.87276e-15	Secondary Metabolism	Phenylpropanoids	Lignins	Auxin homeostasis. Cell wall organization. Lignin biosynthetic process. Positive regulation of flavonoid biosynthetic process
LOC18052666	quinone oxidoreductase PIG3	-7.27299	0.513337	6.94393e-34	2.02765e-32	Stress Responses	Redox	Oxidoreductases	May be involved in the generation of reactive oxygen species (ROS). Has low NADPH-dependent beta-naphthoquinone reductase activity, with a preference for 1,2-beta-naphthoquinone over 1,4-beta-naphthoquinone. Has low NADPH-dependent diamine reductase activity (in vitro).
LOC18032251	uncharacterized membrane protein At1g16860	-7.21244	0.6016	1.18978e-24	2.40064e-23	NA	Uncharacterized process	NA	Uncharacterized process
LOC18051037	mitochondrial pyruvate carrier 4	-7.16675	0.824938	1.81826e-13	2.01171e-12	Regulation and Transport	Transport	Mitochondrial pyruvate carrier	Mediates the uptake of pyruvate into mitochondria.
LOC18045796	inositol 2-dehydrogenase/D-chiro-inositol 3-dehydrogenase	-7.16119	0.708512	9.34925e-18	1.3429e-16	Signalling	Membranes, RE, signalling	NA	Involved in the oxidation of myo-inositol (MI) and D-chiro-inositol (DCI) to 2-keto-myo-inositol (2KMI or 2-inosose) and 1-keto-D-chiro-inositol (1KDCI), respectively.
LOC18047729	uncharacterized LOC18047729	-7.15418	0.276084	3.94659e-110	6.77508e-108	NA	Uncharacterized process	NA	Uncharacterized process
LOC18033633	cation/H(+) antiporter 24	7.12608	0.690279	1.04113e-18	1.57629e-17	Regulation and Transport	Transport	Cation/H+ antiporter	May operate as a cation/H+ antiporter.
LOC18049514	uncharacterized LOC18049514	-7.11615	0.663701	5.37696e-20	8.79104e-19	NA	Uncharacterized process	NA	Uncharacterized process
LOC18043928	transcription factor TCP15	-7.09119	0.296565	1.47768e-93	1.8949e-91	Regulation and Transport	Hormonal regulation	Gibberellins	Transcription factor involved the regulation of plant development. Together with TCP14, modulates plant stature by promoting cell division in young internodes. Represses cell proliferation in developing leaf blade and specific floral tissues (PubMed:21668538).Together with TCP15, acts downstream of gibberellin (GA), and the stratification pathways that promote seed germination. Involved in the co…
LOC112098329	uncharacterized LOC112098329	7.07616	0.965509	1.21932e-09	1.03947e-08	NA	Uncharacterized process	NA	Uncharacterized process
LOC18051247	O-fucosyltransferase 8	-7.06603	0.97812	1.36368e-09	1.1556e-08	Cellullar Growth	Cell wall	NA	Glycosyltransferase activity
LOC18039951	tropinone reductase-like 1	7.03352	0.269647	1.14236e-110	2.0097e-108	Secondary Metabolism	Alkaloids	Tropane	Catalyzes the stereospecific reduction of tropinone to tropine.
LOC18031275	ABC transporter G family member 8	-7.02572	0.437231	5.99696e-43	2.32104e-41	Regulation and Transport	Transport	ABC	ABC transporter
LOC18034637	uncharacterized LOC18034637	-6.99852	0.993121	3.05432e-09	2.522e-08	NA	Uncharacterized process	NA	Uncharacterized process
LOC18038859	U-box domain-containing protein 40	-6.9905	0.496034	1.90998e-33	5.53167e-32	Gene Expression	Ubiquitination	Proteasome	Functions as an E3 ubiquitin ligase.
LOC112099705	protein SUPPRESSOR OF npr1-1, CONSTITUTIVE 1-like	-6.98937	0.588856	6.92826e-24	1.34933e-22	Stress Responses	Plant defense	NA	Defense response, hydrolase activity.
LOC18033888	auxin-responsive protein SAUR50	-6.9811	0.697335	9.83698e-18	1.412e-16	Regulation and Transport	Hormonal regulation	Auxins	Effector of hormonal and environmental signals in plant growth.
LOC18039659	disease resistance protein At4g27190	-6.9618	0.394464	1.56992e-51	7.82645e-50	Stress Responses	Plant defense	NA	NB-ARC domain-containing disease resistance protein.
LOC18052316	uncharacterized LOC18052316	-6.9184	0.725676	5.87843e-16	7.52008e-15	NA	Uncharacterized process	NA	Uncharacterized process
LOC18039199	putative receptor-like protein kinase At3g47110	6.90365	1.07687	3.71002e-08	2.84493e-07	Signalling	Receptors, kinases, transduction	NA	Putative receptor-like protein kinase
LOC18039580	homeobox-leucine zipper protein HAT7	6.81289	0.570973	2.71931e-25	5.65292e-24	Gene Expression	Transcription	NA	Probable transcription factor.
LOC18032990	basic 7S globulin	-6.81179	0.858193	1.29917e-11	1.27975e-10	Development	Seed, embryo development	NA	Seed storage protein. Has a protein kinase activity. Binds leginsulin.
LOC18048826	uncharacterized LOC18048826	6.80986	0.706338	1.33464e-16	1.78122e-15	NA	Uncharacterized process	NA	Uncharacterized process
LOC18041562	disease resistance protein At4g27190	-6.80728	0.364084	2.34526e-57	1.35294e-55	Stress Responses	Plant defense	NA	NB-ARC domain-containing disease resistance protein.
LOC112098085	DEAD-box ATP-dependent RNA helicase 5-like	6.79865	0.5148	1.12717e-29	2.79326e-28	Gene Expression	Nucleic acids processing	NA	RNA helicase activity
LOC18031687	3,9-dihydroxypterocarpan 6A-monooxygenase	-6.79456	0.742313	7.61404e-15	9.13127e-14	NA	Phytoalexins	Isoflavones	Cytochrome P450 involved in the biosynthesis of the phytoalexin glyceollin. Stereospecific for (6aR,11aR)-3,9-dihydroxypterocarpan.
LOC18049882	transcription factor bHLH128	-6.79079	0.518673	1.24531e-28	2.95859e-27	Gene Expression	Transcription	NA	DNA-binding transcription factor activity
LOC18052687	21 kDa protein	-6.78407	0.560547	9.84888e-25	1.9986e-23	NA	Uncharacterized process	NA	Uncharacterized process
LOC18038912	interactor of constitutive active ROPs 2, chloroplastic	-6.78178	0.155208	1.78751e-304	3.45916e-301	Development	Chloroplast	NA	Acts as a scaffold, mediating interaction of ROPs with different proteins.
LOC18044661	protein PHLOEM PROTEIN 2-LIKE A1	-6.76591	0.384461	8.22222e-51	4.04218e-49	NA	Uncharacterized process	NA	Uncharacterized process
LOC18036350	G-type lectin S-receptor-like serine/threonine-protein kinase At1g67520	-6.76396	0.497638	7.89151e-31	2.0688e-29	Signalling	Receptors, kinases, transduction	NA	G-type lectin S-receptor-like serine/threonine-protein kinase
LOC112100821	peroxidase 15-like	6.75681	0.835269	2.96512e-12	3.03893e-11	Stress Responses	Redox	Oxidoreductases	Removal of H2O2, oxidation of toxic reductants, biosynthesis and degradation of lignin, suberization, auxin catabolism, response to environmental stresses such as wounding, pathogen attack and oxidative stress. These functions might be dependent on each isozyme/isoform in each plant tissue.
LOC18044011	cytochrome P450 82A3	6.7537	0.690636	1.11562e-16	1.49548e-15	Stress Responses	Redox	Oxidoreductases	iron ion binding
LOC112097724	uncharacterized LOC112097724	-6.74435	1.30984	5.65489e-07	3.96625e-06	NA	Uncharacterized process	NA	Uncharacterized process
LOC112097254	cationic peroxidase 1-like	-6.74222	0.75993	2.91501e-15	3.58889e-14	Stress Responses	Redox	Oxidoreductases	Removal of H2O2, oxidation of toxic reductants, biosynthesis and degradation of lignin, suberization, auxin catabolism, response to environmental stresses such as wounding, pathogen attack and oxidative stress. These functions might be dependent on each isozyme/isoform in each plant tissue.
LOC18052146	putative UPF0481 protein At3g02645	6.74195	0.257411	1.09688e-110	1.94578e-108	NA	Uncharacterized process	NA	Uncharacterized process
LOC112096594	18S ribosomal RNA	6.72958	0.589644	2.64111e-23	5.02874e-22	Gene Expression	Translation	Ribosomal proteins	Ribosomal protein
LOC18041559	NAC transcription factor 29	6.71805	0.628568	1.62361e-19	2.58502e-18	Regulation and Transport	Hormonal regulation	Abscicis acid	Transcription activator that binds to, and transactivates the promoter of the abscisic aldehyde oxidase AAO3. Promotes chlorophyll degradation in leaves by enhancing transcription of AAO3, which leads to increased levels of the senescence-inducing hormone abscisic acid (ABA) (PubMed:25516602).Involved in the control of dehydration in senescing leaves. Binds to the DNA sequence 5'-CACGTAAGT-3' of …
LOC18049516	uncharacterized LOC18049516	-6.70529	0.429488	1.93128e-40	6.94446e-39	NA	Uncharacterized process	NA	Uncharacterized process
LOC18046195	ethylene-responsive transcription factor ERF021	6.69835	0.607139	4.5411e-21	7.75813e-20	Regulation and Transport	Hormonal regulation	Ethylene	Acts as a transcriptional activator. Binds to the GCC-box pathogenesis-related promoter element. Involved in the regulation of gene expression by stress factors and by components of stress signal transduction pathways.
LOC18040857	aspartyl protease AED3	-6.69084	0.161677	4.92542e-272	5.82486e-269	Stress Responses	Cell death	NA	Aspartic-type endopeptidase activity
LOC112095422	probable pectinesterase/pectinesterase inhibitor 21	6.68669	0.328037	1.76999e-67	1.28593e-65	Cellullar Growth	Cell wall	NA	Acts in the modification of cell walls via demethylesterification of cell wall pectin.
LOC18045901	disease resistance-like protein DSC1	6.66638	0.878158	1.01576e-10	9.50857e-10	Stress Responses	Plant defense	NA	TIR-NB-LRR receptor-like protein involved in plant defense. Acts as a trigger of hypersensitive response (HR). Functions as guard of CAMTA3, a negative regulator of immunity, during pathogen infection.
LOC18042814	uncharacterized LOC18042814	6.65433	0.879835	1.32629e-10	1.22697e-09	NA	Uncharacterized process	NA	Uncharacterized process
LOC18048519	disease resistance-like protein DSC1	-6.65327	0.484784	2.92212e-31	7.80467e-30	Stress Responses	Plant defense	NA	TIR-NB-LRR receptor-like protein involved in plant defense. Acts as a trigger of hypersensitive response (HR). Functions as guard of CAMTA3, a negative regulator of immunity, during pathogen infection.
LOC18038792	phosphate transporter PHO1 homolog 3	-6.65315	0.402585	8.63586e-45	3.4949e-43	Regulation and Transport	Transport	Inorganic phosphate	May transport inorganic phosphate (Pi).
LOC112100401	probable RNA-dependent RNA polymerase 1	-6.64354	0.850461	4.34728e-11	4.17037e-10	Gene Expression	Transcription	RNA polymerase	RNA polymerase
LOC18049265	GDSL esterase/lipase At4g28780	-6.63577	0.183534	1.45126e-207	9.36149e-205	NA	Uncharacterized process	NA	Lipid catabolic process
LOC18035114	4-coumarate--CoA ligase-like 7	6.63489	0.128286	0	0	Regulation and Transport	Hormonal regulation	Jasmonic acid	Contributes to jasmonic acid biosynthesis by initiating the beta-oxidative chain shortening of its precursors.
LOC18055220	condensin complex subunit 2	-6.62776	0.421956	4.41835e-41	1.61604e-39	Cellullar Growth	Cell division	Mitosis	Homo. Regulatory subunit of the condensin complex, a complex required for conversion of interphase chromatin into mitotic-like condense chromosomes. The condensin complex probably introduces positive supercoils into relaxed DNA in the presence of type I topoisomerases and converts nicked DNA into positive knotted forms in the presence of type II topoisomerases
LOC18042376	berberine bridge enzyme-like 18	6.62344	0.24663	5.84449e-116	1.13102e-113	NA	Uncharacterized process	NA	Uncharacterized process
LOC112097682	uncharacterized LOC112097682	-6.6217	0.486083	1.05639e-30	2.74906e-29	NA	Uncharacterized process	NA	Uncharacterized process
LOC18031235	agamous-like MADS-box protein AGL18	-6.61953	0.55815	1.04902e-23	2.02636e-22	Development	Flowering	NA	Probable transcription factor involved in the negative regulation of flowering, probably through the photoperiodic pathway. Prevents premature flowering. Downstream regulator of a subset of the MIKC* MADS-controlled genes required during pollen maturation.
LOC18037574	histidine kinase 1	-6.61354	0.341252	1.19926e-60	7.53056e-59	Regulation and Transport	Hormonal regulation	Abscisic acid	Functions as an osmosensor histidine kinase that detects water stress and transmits the stress signal to a downstream MAPK cascade. This protein undergoes an ATP-dependent autophosphorylation at a conserved histidine residue in the kinase core, and a phosphoryl group is then transferred to a conserved aspartate residue in the receiver domain. Positive regulator of drought and salt stress response…
LOC112101056	probable F-box protein At1g30780	6.6006	0.455536	1.04388e-35	3.16992e-34	Signalling	Receptors, kinases, transduction	NA	probable F-box protein
LOC112098067	disease resistance protein At4g27190-like	6.59937	0.536855	6.16693e-26	1.30622e-24	Stress Responses	Plant defense	NA	Disease resistance protein
LOC18037583	uncharacterized LOC18037583	-6.59781	0.495354	1.98672e-29	4.87228e-28	NA	Uncharacterized process	NA	Uncharacterized process
LOC18048645	silicon efflux transporter LSI2	-6.59366	0.96074	1.35547e-08	1.06946e-07	Regulation and Transport	Transport	Silicon	Silicon efflux transporter involved in silicon transport from the root cells to the apoplast. Is coupled with the silicon influx transporter NIP2-1/LSI1 in both exodermal and endodermal root cells for an efficient silicon transport across the cells into the stele. Silicon is beneficial to plant growth and helps plants to overcome abiotic and biotic stresses by preventing lodging (falling over) an…
LOC18055692	early nodulin-93	-6.588	0.381377	4.32442e-49	2.03209e-47	NA	Uncharacterized process	NA	Nodulation
LOC18051950	uncharacterized LOC18051950	6.57279	0.847188	5.78984e-11	5.50707e-10	NA	Uncharacterized process	NA	Uncharacterized process
LOC18049519	probable leucine-rich repeat receptor-like serine/threonine-protein kinase At3g14840	6.56904	0.92577	1.57347e-09	1.32809e-08	Signalling	Receptors, kinases, transduction	NA	probable leucine-rich repeat receptor-like serine/threonine-protein kinase
LOC18038664	UDP-glycosyltransferase 83A1	6.53121	0.15053	1.6212e-296	2.87587e-293	NA	Uncharacterized process	NA	UDP-glycosyltransferase activity
LOC18047119	disease resistance-like protein DSC1	6.52971	0.28352	9.68131e-85	1.01023e-82	Stress Responses	Plant defense	NA	TIR-NB-LRR receptor-like protein involved in plant defense. Acts as a trigger of hypersensitive response (HR). Functions as guard of CAMTA3, a negative regulator of immunity, during pathogen infection.
LOC18043233	transcription and mRNA export factor ENY2	6.51481	0.534975	3.38896e-25	7.01076e-24	Gene Expression	Chromatin, histones	NA	Involved in mRNA export coupled transcription activation by association with both the TREX-2 and the SAGA complexes. The transcription regulatory histone acetylation (HAT) complex SAGA is a multiprotein complex that activates transcription by remodeling chromatin and mediating histone acetylation and deubiquitination. Within the SAGA complex, participates in a subcomplex that specifically deubiqu…
LOC18047823	transcription factor UNE10	6.50936	0.327689	4.5994e-64	3.09833e-62	Development	Gametophyte	Fertilization	Required during the fertilization of ovules by pollen.
LOC18032146	repetitive proline-rich cell wall protein 1	6.50867	0.562179	3.09935e-23	5.88019e-22	Cellullar Growth	Cell wall	NA	This is a developmentally regulated putative cell wall protein.
LOC18054703	receptor-like protein EIX2	6.50542	0.770341	4.30446e-13	4.64886e-12	Stress Responses	Plant defense	NA	Involved in plant defense. Confers resistance to the fungal pathogen T.viride through recognition of the EIX elicitor protein.
LOC18038673	gibberellin-regulated protein 5	6.49527	0.225403	1.03939e-131	2.48601e-129	Regulation and Transport	Hormonal regulation	Gibberellins	Gibberellin-regulated protein that acts as a negative regulator of gibberellin-induced flowering and stem growth. May inhibit flowering and inflorescence growth via a pathway involving GAI and by enhancing FLC expression and repressing FT and LFY. Acts as a negative regulator in thermotolerance by resogulating both salicylic acid (SA) signaling and heat shock-protein accumulation.
LOC112098448	uncharacterized LOC112098448	-6.49349	0.168181	4.90162e-235	4.34753e-232	NA	Uncharacterized process	NA	Uncharacterized process
LOC18042403	uncharacterized LOC18042403	6.49268	0.376971	7.41124e-49	3.44461e-47	NA	Uncharacterized process	NA	Uncharacterized process
LOC18039132	protein LITTLE ZIPPER 4	-6.49254	0.860385	1.98622e-10	1.81151e-09	Development	Organ development, differentiation	NA	Competitive inhibitor of the HD-ZIPIII transcription factors in shoot apical meristem (SAM) development (Probable). Acts by forming non-functional heterodimers (Probable). Part of a negative feedback loop (Probable). Essential for proper functioning of stem cells in the SAM (PubMed:18408069).
LOC18054035	PRA1 family protein H	-6.48259	0.255576	5.6241e-102	8.14423e-100	Regulation and Transport	Trafficking, vesicles	NA	May be involved in both secretory and endocytic intracellular trafficking in the endosomal/prevacuolar compartments.
LOC18038629	aspartic proteinase PCS1	-6.46738	0.513976	1.8964e-26	4.11506e-25	Stress Responses	Cell death	NA	Embryo-specific aspartic protease that limits programmed cell death during reproductive development. Possesses peptidase activity toward casein in vitro.
LOC18044059	protein TORNADO 2	6.46279	1.08965	8.40611e-08	6.28745e-07	Regulation and Transport	Hormonal regulation	Auxins	Involved in the basipetal transport of auxin (IAA) that modulates growth and organs organization, as well as cell differentiation. Regulates shoot apical meristem (SAM) organization in the peripheral zone. Required for initial meristematic divisions in the epidermal/lateral root cap leading to the formation of epidermal cells and a clone of lateral root cap cells, as well as for the maintenance o…
LOC112100916	zinc finger CCCH domain-containing protein 5-like	6.45159	1.09149	7.11553e-08	5.35035e-07	Gene Expression	Transcription	NA	zinc finger CCCH domain-containing protein
LOC112098312	spermidine-binding periplasmic protein SpuE-like	-6.44034	0.549139	6.50629e-23	1.21491e-21	NA	Uncharacterized process	NA	Uncharacterized process
LOC112097730	uncharacterized LOC112097730	-6.43935	0.568095	9.05677e-22	1.6066e-20	NA	Uncharacterized process	NA	Uncharacterized process
LOC18052219	cationic amino acid transporter 1	-6.427	0.653013	1.46263e-16	1.93988e-15	Regulation and Transport	Transport	Amino acids	High-affinity permease involved in the transport of the cationic amino acids (e.g. arginine, lysine, histidine, citrulline, valine, and glutamate). Transport mostly basic amino acids, and, to a lower extent neutral and acidic amino acids. May function as a proton symporter.
LOC18041974	heat stress transcription factor B-4	-6.42397	0.594374	1.20062e-19	1.92596e-18	Stress Responses	Abiotic stress	Heat	Transcriptional regulator that specifically binds DNA sequence 5'-AGAAnnTTCT-3' known as heat shock promoter elements (HSE).
LOC112100186	uncharacterized LOC112100186	-6.42285	0.719681	7.69119e-14	8.73652e-13	NA	Uncharacterized process	NA	Uncharacterized process
LOC18045619	thylakoid lumenal 19 kDa protein, chloroplastic	-6.41231	0.59348	1.09393e-19	1.75747e-18	Development	Chloroplast	NA	Chloroplast
LOC18054557	pentatricopeptide repeat-containing protein At4g04790, mitochondrial	-6.40763	0.595095	1.65319e-19	2.6282e-18	NA	Uncharacterized process	NA	tetratricopeptide repeat protein
LOC18034046	chitinase 2	-6.37925	0.567541	2.35293e-21	4.08871e-20	Stress Responses	Plant defense	NA	Chitinase involved in the remodeling of chitin in the fungal cell wall. Plays a role in cell separation.
LOC18046233	tyrosine-specific transport protein	-6.36705	0.848204	3.03577e-10	2.71295e-09	Regulation and Transport	Transport	Amino acids	Involved in transporting tyrosine across the cytoplasmic membrane.
LOC18050765	methanol O-anthraniloyltransferase	-6.35843	0.196379	6.41655e-164	2.3963e-161	Secondary Metabolism	Alkaloids	Acridine	Acyltransferase that catalyzes the formation of methyl anthranilate, a compound implicated in the 'foxy' odor character of Concord grapes. Can use a variety of alcohol substrates when assayed with both benzoyl-CoA and anthraniloyl-CoA. The compound responsible for the pungency in the essential oils of leaves from Citrus reticulata is methyl-N-methylanthranilate
LOC18052450	protein YLS3	-6.35027	0.332722	2.56888e-58	1.52323e-56	NA	Uncharacterized process	NA	Uncharacterized process
LOC112096716	putative disease resistance protein RGA3	-6.34655	0.601198	8.55102e-19	1.29926e-17	Stress Responses	Plant defense	NA	Belongs to a four-gene family located at the same locus. Although the four genes are expressed in the resistant haplotype, only RGA2 confers the resistance to P.infestans. In the susceptible haplotype, RGA1 and RGA3 are likely to be pseudogenes created by deletions and mutations, while RGA2 contains also several modifications.
LOC18037735	patellin-3	-6.34466	0.136718	0	0	Cellullar Growth	Cell division	Cytokinesis	Carrier protein that may be involved in membrane-trafficking events associated with cell plate formation during cytokinesis. Binds to some hydrophobic molecules such as phosphoinositides and promotes their transfer between the different cellular sites (By similarity).
LOC18032545	uncharacterized LOC18032545	6.33889	0.43571	1.06433e-34	3.17316e-33	NA	Uncharacterized process	NA	Uncharacterized process
LOC18053910	uncharacterized LOC18053910	-6.33362	0.366792	4.23214e-48	1.92089e-46	NA	Uncharacterized process	NA	Uncharacterized process
LOC18052432	protein trichome birefringence-like 43	-6.32479	0.63708	1.10341e-16	1.48004e-15	Cellullar Growth	Cell wall	NA	May act as a bridging protein that binds pectin and other cell wall polysaccharides. Probably involved in maintaining esterification of pectins (By similarity).May be involved in the specific O-acetylation of cell wall polymers (By similarity).
LOC18033796	protein DMR6-LIKE OXYGENASE 2	6.28947	0.19804	1.01449e-157	3.66024e-155	Regulation and Transport	Hormonal regulation	Salicylic acid	Converts salicylic acid (SA) to 2,3-dihydroxybenzoic acid (2,3-DHBA) (By similarity).Negative regulator of defense against Hyaloperonospora arabidopsidis (PubMed:25376907).
LOC18053063	disease resistance protein RPP13	-6.28796	0.466153	8.64321e-30	2.15191e-28	Stress Responses	Plant defense	NA	Disease resistance protein
LOC18037144	growth-regulating factor 1	-6.28575	0.678023	6.78595e-15	8.16577e-14	Cellullar Growth	Cell expansion	NA	Transcription activator that plays a role in the regulation of cell expansion in leaf and cotyledons tissues. Component of a network formed by miR396, the GRFs and their interacting factors (GIFs) acting in the regulation of meristem function, at least partially through the control of cell proliferation. microRNA396-GRF1/GRF3 regulatory module acts as a developmental regulator in the reprogrammin…
LOC18048423	protein LIGHT-DEPENDENT SHORT HYPOCOTYLS 1	-6.284	0.673199	4.77064e-15	5.79307e-14	Regulation and Transport	Light signalling	NA	Probable transcription regulator that acts as a developmental regulator by promoting cell growth in response to continuous red (cR), far-red (cFR) and blue (cB) light in a phytochrome-dependent manner, at least during seedling development.
LOC112100345	BTB/POZ and TAZ domain-containing protein 3-like	6.27726	0.415088	2.98408e-37	9.59549e-36	Development	Gametophyte	Fertilization	May act as a substrate-specific adapter of an E3 ubiquitin-protein ligase complex (CUL3-RBX1-BTB) which mediates the ubiquitination and subsequent proteasomal degradation of target proteins. Essential for female and male gametophyte development.
LOC18040500	FT-interacting protein 1	-6.27681	0.46301	5.33506e-30	1.33766e-28	Development	Flowering	NA	Involved in the export of FT from the phloem companion cells to the sieve elements through the plasmodesmata. Regulates flowering time under long days.
LOC112100231	probable glutathione S-transferase	6.27384	0.467613	1.44066e-29	3.55356e-28	Stress Responses	Redox	Oxidoreductases	The chemical reactions and pathways involving glutathione, the tripeptide glutamylcysteinylglycine, which acts as a coenzyme for some enzymes and as an antioxidant in the protection of sulfhydryl groups in enzymes and other proteins; it has a specific role in the reduction of hydrogen peroxide (H2O2) and oxidized ascorbate, and it participates in the gamma-glutamyl cycle.
LOC18046115	LEAF RUST 10 DISEASE-RESISTANCE LOCUS RECEPTOR-LIKE PROTEIN KINASE-like 2.1	6.271	0.79298	2.52895e-11	2.45901e-10	Regulation and Transport	Hormonal regulation	Abscisic acid	Probable receptor-like serine/threonine-protein kinase involved in abscisic acid (ABA) signaling. Acts as a positive regulator of abiotic stress response.
LOC18049030	uncharacterized LOC18049030	-6.24768	0.364195	5.11956e-47	2.2332e-45	NA	Uncharacterized process	NA	Uncharacterized process
LOC18040227	receptor like protein 42	6.24705	1.02681	1.15321e-07	8.55347e-07	Stress Responses	Plant defense	NA	Recognizes fungal (e.g. B.cinerea and A.niger) endopolygalacturonases (PGs, e.g. BcPG3, BcPG2, BcPG4, BcPG6 and AnPGB) and acts as a microbe-associated molecular pattern (MAMP) receptor to mediate defense response against fungi (e.g. B.cinerea) and oomycetes (e.g. H.arabidopsidis). Functionality seems to depend on the presence of the receptor kinase SOBIR1 as an adapter protein.
LOC18035320	protein NRT1/ PTR FAMILY 1.2	-6.24503	0.643305	2.51611e-16	3.29401e-15	Regulation and Transport	Transport	Nitrate	Low-affinity nitrate transporter involved in xylem-to-phloem transfer for redistributing nitrate into developing leaves. Not involved in dipeptides transport.
LOC18037227	AP2-like ethylene-responsive transcription factor AIL6	-6.21791	0.37184	1.10488e-44	4.45446e-43	Regulation and Transport	Hormonal regulation	Ethylene	Probably acts as a transcriptional activator. Binds to the GCC-box pathogenesis-related promoter element. May be involved in the regulation of gene expression by stress factors and by components of stress signal transduction pathways (By similarity).
LOC18044100	protein SRG1	-6.20228	0.394085	1.03289e-39	3.59265e-38	Stress Responses	Plant defense	NA	S-nitrosylation of the zinc finger protein SRG1 regulates plant immunity. Unlike the homologous protein NCS1 of Coptis japonica, SRG1 has no norcoclaurine synthase activity.
LOC18041660	kunitz trypsin inhibitor 2	-6.19372	0.373761	5.77825e-44	2.28627e-42	Stress Responses	Cell death	NA	Water-soluble and chlorophyll-binding protein that probably does not function as a chloroplast chlorophyll carrier and is not involved in photosynthesis (PubMed:11577184, PubMed:26160583). Involved in the control of cell death in the transmitting tract and septum epidermis during flower development. Binds and inhibits the activity of the cysteine protease RD21A as a pro-death protein (PubMed:2616…
LOC18040092	mitoferrin	6.186	0.594576	1.83994e-18	2.7447e-17	Regulation and Transport	Transport	Mitochondrial iron transporter	Mitochondrial iron transporter that mediates iron uptake. Probably required for heme synthesis of hemoproteins and Fe-S cluster assembly.
LOC18043264	V-type proton ATPase subunit H	-6.17817	0.659791	5.00949e-15	6.07619e-14	Regulation and Transport	Transport	Vacuolar ATPase	Subunit of the peripheral V1 complex of vacuolar ATPase. Subunit H activates the ATPase activity of the enzyme and couples ATPase activity to proton flow. Vacuolar ATPase is responsible for acidifying a variety of intracellular compartments in eukaryotic cells, thus providing most of the energy required for transport processes in the vacuolar system (By similarity).Involved in the endocytosis med…
LOC18039167	probable inactive receptor kinase At5g58300	-6.17298	0.278765	7.10278e-77	6.40664e-75	Signalling	Receptors, kinases, transduction	NA	probable inactive receptor kinase
LOC18054621	glutamate receptor 2.8	-6.15523	0.502935	1.01056e-24	2.04874e-23	Regulation and Transport	Light signalling	NA	Glutamate-gated receptor that probably acts as non-selective cation channel. May be involved in light-signal transduction and calcium homeostasis via the regulation of calcium influx into cells.
LOC18051086	palmitoyl-acyl carrier protein thioesterase, chloroplastic	6.15438	0.324903	3.62275e-57	2.06749e-55	Primary Metabolism	Lipids and Fatty Acids	NA	Plays an essential role in chain termination during de novo fatty acid synthesis. Possesses high thioesterase activity for palmitoyl-ACP versus other acyl-ACPs. Substrate preference is 16:0 > 18:1 > 18:0 > 16:1. Plays an essential role in the supply of saturated fatty acids necessary for plant growth and seed development. Contributes to 16:0 production particularly in flowers. May be involved in …
LOC18048655	ethylene-responsive transcription factor ERF039	6.13971	0.834041	2.8236e-10	2.53291e-09	Regulation and Transport	Hormonal regulation	Ethylene	Acts as a transcriptional activator. Binds to the GCC-box pathogenesis-related promoter element. Involved in the regulation of gene expression by stress factors and by components of stress signal transduction pathways.
LOC112098484	chaperonin CPN60-1, mitochondrial-like	6.13814	0.597616	4.25047e-18	6.23139e-17	Gene Expression	Ubiquitination	Proteasome	Maybe implicated in mitochondrial protein import and macromolecular assembly. May facilitate the correct folding of imported proteins. May also prevent misfolding and promote the refolding and proper assembly of unfolded polypeptides generated under stress conditions in the mitochondrial matrix (By similarity).
LOC18053263	uncharacterized LOC18053263	-6.13641	0.254245	7.54848e-92	9.28812e-90	NA	Uncharacterized process	NA	Uncharacterized process
LOC18054047	6-hydroxynicotinate 3-monooxygenase	6.11278	0.368134	1.02453e-44	4.13837e-43	Secondary Metabolism	Alkaloids	Nicotine	Flavin-dependent monooxygenase (FMO) that catalyzes the decarboxylative hydroxylation of 6-hydroxynicotinic acid (6-HNA) to 2,5-dihydroxypyridine (2,5-DHP) with concomitant oxidation of NADH, a step in the aerobic nicotinate degradation pathway. Uses NADH in preference to NADPH as an electron donor.
LOC112096098	disease resistance protein SUMM2-like	-6.09758	0.167715	5.29078e-203	3.21785e-200	Stress Responses	Plant defense	NA	Disease resistance protein
LOC112097709	uncharacterized LOC112097709	-6.08847	0.432916	5.15195e-32	1.41509e-30	NA	Uncharacterized process	NA	Uncharacterized process
LOC18049411	germin-like protein subfamily 1 member 17	6.08228	0.323687	3.84946e-56	2.13951e-54	Stress Responses	Plant defense	NA	May play a role in plant defense. Probably has no oxalate oxidase activity even if the active site is conserved.
LOC18047309	probable pectinesterase 68	-6.07371	0.26478	4.16979e-82	4.16725e-80	Cellullar Growth	Cell wall	NA	Acts in the modification of cell walls via demethylesterification of cell wall pectin.
LOC18045460	probable calcium-binding protein CML16	6.07361	0.75103	5.50777e-12	5.54083e-11	Signalling	Membranes, RE, signalling	NA	Potential calcium sensor.
LOC18047966	putative anthocyanidin reductase	6.07226	0.271664	1.2236e-78	1.13741e-76	Secondary Metabolism	Flavonoids	Anthocyanis	This protein is involved in the pathway flavonoid biosynthesis
LOC18041136	carboxyvinyl-carboxyphosphonate phosphorylmutase, chloroplastic	6.05509	1.1704	1.48034e-06	1.0007e-05	Development	Chloroplast	NA	Uncharacterized processes
LOC18052881	uncharacterized LOC18052881	-6.0514	0.658099	1.81977e-14	2.14019e-13	NA	Uncharacterized process	NA	Uncharacterized process
LOC18033035	defensin Ec-AMP-D1	6.04979	0.430789	1.3546e-32	3.78915e-31	Stress Responses	Plant defense	NA	Disease resistance protein
LOC18031424	uncharacterized LOC18031424	-6.01098	0.692005	3.69618e-13	4.00614e-12	NA	Uncharacterized process	NA	Uncharacterized process
LOC18042767	cytochrome P450 CYP82D47	6.01056	0.301368	5.69033e-63	3.77352e-61	Stress Responses	Redox	Oxidoreductases	Probable heme-thiolate monooxygenase.
LOC112098529	uncharacterized LOC112098529	-6.00847	0.318411	7.9982e-56	4.38808e-54	NA	Uncharacterized process	NA	Uncharacterized process
LOC18049129	uncharacterized LOC18049129	-6.00629	0.387343	3.38519e-38	1.12594e-36	NA	Uncharacterized process	NA	Uncharacterized process
LOC18035586	B3 domain-containing transcription factor VRN1	-5.99171	0.655098	2.97864e-14	3.44413e-13	Development	Flowering	NA	Involved in the regulation of vernalization. Acts as transcriptional repressor of FLC, a major target of the vernalization pathway.
LOC112097396	36.4 kDa proline-rich protein-like	5.9883	0.523517	2.00313e-22	3.67908e-21	NA	Uncharacterized process	NA	Uncharacterized process
LOC18047714	cytochrome P450 71A1	-5.98817	0.382245	7.94276e-39	2.67952e-37	Secondary Metabolism	Phenylpropanoids	NA	Involved in the metabolism of compounds associated with the development of flavor in the ripening fruit process, possibly by acting as trans-cinnamic acid 4-hydrolase.
LOC18040656	pathogen-related protein	5.98809	0.233302	1.25329e-101	1.80262e-99	Stress Responses	Plant defense	NA	Disease resistance protein
LOC18038440	probable leucine-rich repeat receptor-like protein kinase At1g35710	-5.98681	0.490374	1.29572e-24	2.60207e-23	Signalling	Receptors, kinases, transduction	NA	probable leucine-rich repeat receptor-like protein kinase
LOC18052503	peroxidase A2	5.98584	0.698227	5.09917e-13	5.46281e-12	Stress Responses	Redox	Oxidoreductases	Removal of H2O2, oxidation of toxic reductants, biosynthesis and degradation of lignin, suberization, auxin catabolism, response to environmental stresses such as wounding, pathogen attack and oxidative stress. These functions might be dependent on each isozyme/isoform in each plant tissue.
LOC112098377	disease resistance RPP8-like protein 3	-5.98183	0.166408	2.70958e-197	1.47895e-194	Stress Responses	Plant defense	NA	Disease resistance protein
LOC18031567	glutaredoxin	-5.97337	0.596238	3.65699e-17	5.06483e-16	Regulation and Transport	Hormonal regulation	Salicylic acid	In Arabidopsis GRXs are involved in flower development and Salicylic acid signalling. Component of the glutathione system which performs several activities such as glutathione-dependent oxidoreductase, glutathione peroxidase and glutathione S-transferase (GST) activity (PubMed:11875065, PubMed:12684511).The disulfide bond functions as an electron carrier in the glutathione-dependent synthesis of …
LOC18055199	oligopeptide transporter 1	-5.96911	0.836363	3.0597e-09	2.52547e-08	Regulation and Transport	Transport	Oligopeptides	Involved in the translocation of tetra- and pentapeptides across the cellular membrane in an energy-dependent manner.
LOC112101151	uncharacterized LOC112101151	5.96842	0.87919	5.13179e-09	4.14418e-08	NA	Uncharacterized process	NA	Uncharacterized process
LOC18040170	gibberellin-regulated protein 1	5.90148	0.0746652	0	0	Regulation and Transport	Hormonal regulation	Gibberellins	Gibberellin-regulated protein that may function in hormonal controlled steps of development such as seed germination, flowering and seed maturation.
LOC18046161	uncharacterized LOC18046161	-5.89406	0.374219	1.46368e-39	5.05803e-38	NA	Uncharacterized process	NA	Uncharacterized process
LOC18045834	uncharacterized LOC18045834	-5.88548	0.528191	2.30692e-20	3.83652e-19	NA	Uncharacterized process	NA	Uncharacterized process
LOC112098550	disease resistance protein RGA2-like	5.88531	0.483766	1.73984e-24	3.47103e-23	Stress Responses	Plant defense	NA	Belongs to a four-gene family located at the same locus. Although the four genes are expressed in the resistant haplotype, only RGA2 confers the resistance to P.infestans. In the susceptible haplotype, RGA1 and RGA3 are likely to be pseudogenes created by deletions and mutations, while RGA2 contains also several modifications.
LOC18035077	photosystem I subunit O	-5.88307	0.666978	2.48967e-13	2.72482e-12	Development	Chloroplast	Photosynthesis	Photosynthesis, chloroplast
LOC18041709	hippocampus abundant transcript-like protein 1	-5.88193	0.569996	6.49141e-18	9.42583e-17	NA	Uncharacterized process	NA	Uncharacterized process
LOC18033764	deSI-like protein At4g17486	-5.87713	0.270526	1.01029e-72	8.43371e-71	NA	Uncharacterized process	NA	Uncharacterized process
LOC18046706	protein ACCELERATED CELL DEATH 6	5.87525	0.629584	2.33215e-15	2.88799e-14	Regulation and Transport	Hormonal regulation	Salicylic acid	Dose-dependent activator of the defense response against virulent pathogens, including bacteria, fungi and oomycetes, that acts in a positive feedback loop with the defense signal salicylic acid (SA) (PubMed:14507999, PubMed:20520716, PubMed:10488236, PubMed:16297071, PubMed:19144005).Regulates the salicylic acid (SA) signaling pathway leading to cell death and modulating cell fate (e.g. cell enl…
LOC18054632	uncharacterized LOC18054632	-5.86841	0.649269	6.70619e-14	7.62986e-13	NA	Uncharacterized process	NA	Uncharacterized process
LOC18033243	disease resistance protein RPP5	-5.86255	0.30721	1.93133e-56	1.07623e-54	Stress Responses	Plant defense	NA	Disease resistance protein
LOC112098407	putative disease resistance RPP13-like protein 1	-5.83849	0.323253	9.27755e-51	4.54003e-49	Stress Responses	Plant defense	NA	Potential disease resistance protein.
LOC112096710	probable LRR receptor-like serine/threonine-protein kinase At5g45780	-5.8329	0.752021	1.02797e-10	9.61021e-10	Signalling	Receptors, kinases, transduction	NA	probable LRR receptor-like serine/threonine-protein kinase
LOC112101209	uncharacterized LOC112101209	-5.82884	0.551082	2.33257e-18	3.45536e-17	NA	Uncharacterized process	NA	Uncharacterized process
LOC18054041	6-hydroxynicotinate 3-monooxygenase	5.8169	0.345808	4.50531e-45	1.84787e-43	Secondary Metabolism	Alkaloids	Nicotine	Flavin-dependent monooxygenase (FMO) that catalyzes the decarboxylative hydroxylation of 6-hydroxynicotinic acid (6-HNA) to 2,5-dihydroxypyridine (2,5-DHP) with concomitant oxidation of NADH, a step in the aerobic nicotinate degradation pathway. Uses NADH in preference to NADPH as an electron donor.
LOC18052996	protein NUCLEAR FUSION DEFECTIVE 4	-5.81527	0.371379	1.88541e-38	6.31049e-37	Development	Gametophyte	Fertilization	Required for karyogamy during female gametophyte development, when the two polar nuclei fuse to form the diploid central cell nucleus (PubMed:16698901).
LOC112097394	uncharacterized LOC112097394	5.81409	0.708613	5.30484e-12	5.34426e-11	NA	Uncharacterized process	NA	Uncharacterized process
LOC18037884	uncharacterized LOC18037884	-5.81368	0.655052	2.08581e-13	2.29817e-12	NA	Uncharacterized process	NA	Uncharacterized process
LOC18036386	putative cyclic nucleotide-gated ion channel 7	-5.81021	0.621244	8.63391e-15	1.03253e-13	Regulation and Transport	Transport	Ion channel	Putative cyclic nucleotide-gated ion channel.
LOC112098308	elongation of fatty acids protein 3-like	-5.80738	0.401737	3.88089e-33	1.1179e-31	Regulation and Transport	Hormonal regulation	Abscicic acid	Probable very long-chain fatty acid (VLCFA) elongase that controls VLCFA composition and functions to inhibit abscisic acid (ABA)-mediated stress responses, including regulation of stomatal aperture, maintenance of primary root growth and inhibition of germination. VLCFA pathway and products may function as signaling components acting upstream of sphingosine-1-phosphate, ceramide and the heterotr…
LOC18031486	inhibitor of trypsin and hageman factor	-5.79516	0.80784	1.23705e-09	1.05333e-08	Stress Responses	Abiotic stress	Wounding	Specifically inhibits both trypsin and activated Hageman factor. Response to wounding
LOC18055489	probable calcium-binding protein CML21	5.78156	0.361694	3.34273e-40	1.18792e-38	Signalling	Membranes, RE, signalling	NA	Potential calcium sensor.
LOC18033425	major allergen Pru ar 1	5.77746	0.263269	1.9958e-74	1.71309e-72	NA	Uncharacterized process	NA	Uncharacterized process
LOC18034475	receptor-like protein EIX2	5.77001	0.542506	3.36512e-19	5.22109e-18	Stress Responses	Plant defense	NA	Involved in plant defense. Confers resistance to the fungal pathogen T.viride through recognition of the EIX elicitor protein.
LOC18052515	disease resistance protein At4g27190	5.76767	0.570877	6.57395e-17	8.95327e-16	Stress Responses	Plant defense	NA	NB-ARC domain-containing disease resistance protein.
LOC18052333	cinnamoyl-CoA reductase 1	5.75682	0.139208	1.71573e-256	1.92225e-253	Secondary Metabolism	Phenylpropanoids	Lignins	Involved in the latter stages of lignin biosynthesis. Catalyzes one of the last steps of monolignol biosynthesis, the conversion of cinnamoyl-CoAs into their corresponding cinnamaldehydes.
LOC18042936	floral homeotic protein DEFICIENS	-5.74882	0.290557	3.4925e-60	2.16749e-58	Development	Flowering	NA	Transcription factor involved in the genetic control of flower development. Acts in conjunction with GLOBOSA (glo).
LOC18045829	FT-interacting protein 1	-5.7343	0.411035	7.88872e-31	2.0688e-29	Development	Flowering	NA	Involved in the export of FT from the phloem companion cells to the sieve elements through the plasmodesmata. Regulates flowering time under long days. Unlike other flowering promoters, overexpression of FTIP1 causes late flowering due to the deregulation of FT transport out of the phloem system
LOC18046029	uncharacterized LOC18046029	-5.70193	0.172033	5.17997e-165	1.96904e-162	NA	Uncharacterized process	NA	Uncharacterized process
LOC18040570	uncharacterized LOC18040570	5.69731	0.545974	5.7694e-18	8.41186e-17	NA	Uncharacterized process	NA	Uncharacterized process
LOC18050504	receptor-like protein 9DC3	-5.69174	0.232001	6.6889e-91	7.99925e-89	Stress Responses	Plant defense	NA	Involved in plant defense. Confers resistance to the fungal pathogen C.fulvum through recognition of the AVR9 elicitor protein.
LOC18032415	arogenate dehydratase/prephenate dehydratase 2, chloroplastic	-5.68903	0.290457	1.01142e-58	6.13393e-57	Development	Chloroplast	NA	Converts the prephenate produced from the shikimate-chorismate pathway into phenylalanine.
LOC18043439	transcription factor PIF4	-5.68294	0.484326	3.58062e-22	6.51459e-21	Regulation and Transport	Light signalling	NA	Transcription factor acting negatively in the phytochrome B signaling pathway. May regulate the expression of a subset of genes involved in cell expansion by binding to the G-box motif (By similarity).Activated by CRY1 and CRY2 in response to low blue light (LBL) by direct binding at chromatin on E-box variant 5'-CA[CT]GTG-3' to stimulate specific gene expression to adapt global physiology (e.g. …
LOC18040420	protein RALF-like 33	-5.68288	0.43339	1.6668e-27	3.7746e-26	Signalling	Membranes, RE, signalling	NA	Cell signaling peptide that may regulate plant stress, growth, and development. Mediates a rapid alkalinization of extracellular space by mediating a transient increase in the cytoplasmic Ca2+ concentration leading to a calcium-dependent signaling events through a cell surface receptor and a concomitant activation of some intracellular mitogen-activated protein kinases (By similarity).
LOC18049087	TMV resistance protein N	-5.68224	0.680364	4.52051e-12	4.56923e-11	Stress Responses	Plant defense	NA	Disease resistance protein
LOC18046366	cytochrome P450 83B1	5.65311	0.758544	3.63169e-10	3.21848e-09	Regulation and Transport	Hormonal regulation	Auxins	Involved in the metabolism of aromatic oximes. Catalyzes the oxime metabolizing step in indole glucosinolate biosynthesis by converting indole-3-acetaldoxime into indole-3-S-alkyl-thiohydroximate. Probably required for glucosinolate activation in response to pathogens. Functions in auxin homeostasis because indole-3-acetaldoxime also serves as a precursor for auxin biosynthesis. Specifically meta…
LOC112100757	receptor-like protein EIX1	5.6348	0.737064	8.99262e-11	8.43658e-10	Stress Responses	Plant defense	NA	Involved in plant defense. Confers resistance to the fungal pathogen T.viride through recognition of the EIX elicitor protein.
LOC18037906	vinorine synthase	5.63303	0.267016	2.54169e-68	1.88519e-66	Secondary Metabolism	Alkaloids	Ajmaline	Acetyltransferase that catalyzes the formation of vinorine, a precursor of the antiarrhythmic monoterpenoid indole alkaloid ajmaline. Acts on gardneral, but not on polyneuridine aldehyde or N-methylgardneral.
LOC18049115	transcription factor MYB11	-5.63302	0.220671	1.38293e-98	1.91158e-96	Secondary Metabolism	Flavonoids	Flavonols	Modulates overall growth by reducing the proliferation activity of meristematic cells and delaying development (PubMed:18359753).Flavonol-specific transcription activator involved in the regulation of several genes of flavonoid biosynthesis. Activates the expression of CHS, CHI, F3H and FLS1 (PubMed:17419845, PubMed:20731781).onfers tolerance to UV-B (PubMed:19895401).
LOC18049969	nudix hydrolase 8	-5.61325	0.499934	2.14164e-20	3.57001e-19	Regulation and Transport	Hormonal regulation	Salicylic acid	Probably mediates the hydrolysis of some nucleoside diphosphate derivatives (By similarity).May be involved in plant immunity and act as a positive regulator of defense response through salicylic acid (SA) signaling (PubMed:25436909).
LOC18036154	protein BIG GRAIN 1-like B	-5.60986	0.480034	5.75895e-22	1.03017e-20	Regulation and Transport	Hormonal regulation	Auxins	Involved in auxin transport. Regulator of the auxin signaling pathway.
LOC18041279	uncharacterized LOC18041279	-5.58432	0.177993	1.07647e-146	3.18262e-144	NA	Uncharacterized process	NA	Uncharacterized process
LOC112095429	uncharacterized LOC112095429	-5.57803	0.552856	7.47737e-17	1.01642e-15	NA	Uncharacterized process	NA	Uncharacterized process
LOC18032922	flavonoid 3'-monooxygenase	-5.57664	0.355748	8.12376e-38	2.65638e-36	Secondary Metabolism	Flavonoids	Flavanones, flavonols	Catalyzes the 3'-hydroxylation of the flavonoid B-ring to the 3',4'-hydroxylated state. Convert naringenin to eriodictyol and dihydrokaempferol to dihydroquercetin.
LOC18039484	pleiotropic drug resistance protein 3	-5.55695	0.384249	1.74975e-32	4.86887e-31	Stress Responses	Plant defense	NA	May be a general defense protein.
LOC18047772	uncharacterized LOC18047772	-5.55606	0.745759	7.53831e-10	6.51779e-09	NA	Uncharacterized process	NA	Uncharacterized process
LOC18049947	receptor-like protein 9DC3	-5.55349	0.426165	8.01866e-27	1.76518e-25	Stress Responses	Plant defense	NA	Involved in plant defense. Confers resistance to the fungal pathogen C.fulvum through recognition of the AVR9 elicitor protein.
LOC112098452	putative disease resistance protein RGA4	-5.54845	0.42194	1.39036e-27	3.17219e-26	Stress Responses	Plant defense	NA	Belongs to a four-gene family located at the same locus. Although the four genes are expressed in the resistant haplotype, only RGA2 confers the resistance to P.infestans. In the susceptible haplotype, RGA1 and RGA3 are likely to be pseudogenes created by deletions and mutations, while RGA2 contains also several modifications.
LOC112096619	H/ACA ribonucleoprotein complex subunit 1-like	-5.54521	0.448005	1.57696e-24	3.15199e-23	Gene Expression	Translation	Ribosomal proteins	Required for ribosome biogenesis and telomere maintenance. Part of the H/ACA small nucleolar ribonucleoprotein (H/ACA snoRNP) complex, which catalyzes pseudouridylation of rRNA. This involves the isomerization of uridine such that the ribose is subsequently attached to C5, instead of the normal N1. Each rRNA can contain up to 100 pseudouridine ('psi') residues, which may serve to stabilize the co…
LOC18055788	protein SPEAR3	5.54459	0.369527	3.50698e-35	1.05741e-33	Development	Organ development, differentiation	NA	Transcriptional regulator of leaf development. Acts as an adapter-like transcriptional repressor recruiting TPL/TPR corepressors to inhibit the CIN-like TCP transcription factors (PubMed:23444332).
LOC18035781	BTB/POZ domain-containing protein At3g49900	-5.54441	0.322219	1.59537e-45	6.64592e-44	Gene Expression	Ubiquitination	Proteasome	May act as a substrate-specific adapter of an E3 ubiquitin-protein ligase complex (CUL3-RBX1-BTB) which mediates the ubiquitination and subsequent proteasomal degradation of target proteins.
LOC18033321	nucleolar GTP-binding protein 1	5.54052	0.618408	7.89936e-14	8.95865e-13	Gene Expression	Translation	Ribosomal proteins	Involved in the biogenesis of the 60S ribosomal subunit.
LOC18050499	receptor-like protein 9DC3	-5.54033	0.234295	4.4426e-84	4.56858e-82	Stress Responses	Plant defense	NA	Involved in plant defense. Confers resistance to the fungal pathogen C.fulvum through recognition of the AVR9 elicitor protein.
LOC18046384	disease resistance response protein 206	5.53743	0.451451	1.20335e-24	2.42115e-23	Stress Responses	Plant defense	NA	Disease resistance protein
LOC18050875	phosphoenolpyruvate/phosphate translocator 2, chloroplastic	5.53125	1.30535	5.09454e-05	0.000297279	Development	Chloroplast	NA	Phosphoenolpyruvate/phosphate translocator that transports phosphoenolpyruvate (PEP), 2-phosphoglycerate and 3-phosphoglycerate.
LOC18042214	uncharacterized LOC18042214	-5.52587	0.149787	1.86501e-201	1.07299e-198	NA	Uncharacterized process	NA	Uncharacterized process
LOC112096730	autophagy-related protein 101-like	5.5246	0.60702	4.22546e-14	4.8594e-13	Regulation and Transport	Trafficking, vesicles	NA	Autophagy factor required for autophagosome formation. Stabilizes ATG13, protecting it from proteasomal degradation.-
LOC18035536	uncharacterized LOC18035536	5.51925	0.408459	6.14997e-29	1.47759e-27	NA	Uncharacterized process	NA	Uncharacterized process
LOC18044407	protein NRT1/ PTR FAMILY 3.1	-5.5081	0.455956	3.56531e-23	6.75822e-22	Regulation and Transport	Transport	Nitrite	May act as an efflux-type nitrite transporter. Not regulated by the PII protein involved in the regulation of nitrite uptake into higher plant chloroplasts.
LOC18050978	serine/threonine-protein kinase STY13	-5.5043	0.312234	2.70836e-47	1.19364e-45	Signalling	Receptors, kinases, transduction	NA	Serine/threonine protein kinase that phosphorylates proteins on serine, threonine and tyrosine residues.
LOC18049496	probable leucine-rich repeat receptor-like serine/threonine-protein kinase At3g14840	-5.49873	0.558344	6.99684e-16	8.90267e-15	Signalling	Receptors, kinases, transduction	NA	probable leucine-rich repeat receptor-like serine/threonine-protein kinase
LOC18051014	cellulose synthase-like protein B4	-5.49766	0.339458	4.41043e-41	1.61592e-39	Cellullar Growth	Cell wall	NA	Thought to be a Golgi-localized beta-glycan synthase that polymerize the backbones of noncellulosic polysaccharides (hemicelluloses) of plant cell wall.
LOC18041804	ethylene-responsive transcription factor ERF014	5.493	0.189346	2.54271e-125	5.69755e-123	Regulation and Transport	Hormonal regulation	Ethylene	Acts as a transcriptional activator. Binds to the GCC-box pathogenesis-related promoter element. Involved in the regulation of gene expression by stress factors and by components of stress signal transduction pathways.
LOC18055776	UDP-glycosyltransferase 91C1	5.4795	0.213696	5.30554e-98	7.28639e-96	NA	Uncharacterized process	NA	UDP-glycosyltransferase activity
LOC18033231	7-ethoxycoumarin O-deethylase	5.47695	0.25731	1.20411e-68	9.05719e-67	NA	Uncharacterized process	NA	Capable of dealkylating a model xenobiotic compound, 7-ethoxycoumarin. Metabolizes with high efficiency a wide range of xenobiotics, including alkoxycoumarins, alkoxyresorufins, and several herbicides of the class of phenylureas. Catalyzes the double N-dealkylation (oxidative N-demethylation) of phenylureas such as chlortoluron and isoproturon with turnover rates comparable to those reported for …
LOC18031830	polygalacturonase At1g48100	-5.46614	0.175784	1.70472e-143	4.90384e-141	NA	Uncharacterized process	NA	Polygalacturonase not involved in the final stages of pod shatter.
LOC18040130	transcription factor MYB1R1	-5.46326	0.259744	2.40267e-66	1.69356e-64	Regulation and Transport	Hormonal regulation	Abscisic acid	Binds selectively to the DNA sequence 5'-[GA]GATAA-3' and may act as a transcription factor involved in the regulation of drought-responsive genes. Enhances stomatal closure in response to abscisic acid (ABA). Confers drought and salt tolerance.
LOC18053781	calcium uptake protein, mitochondrial	-5.4627	0.766969	2.43847e-09	2.02764e-08	Regulation and Transport	Transport	Calcium uniporter	Key regulator of mitochondrial calcium uniporter (MCU) that senses calcium level via its EF-hand domains.MICU1 and MICU2 form a disulfide-linked heterodimer that stimulates and inhibits MCU activity, depending on the concentration of calcium. MICU1 acts both as an activator or inhibitor of mitochondrial calcium uptake (PubMed:26903221).Acts as a gatekeeper of MCU at low concentration of calcium, …
LOC18048269	VAN3-binding protein	-5.45253	0.246378	8.58971e-74	7.22724e-72	Regulation and Transport	Hormonal regulation	Auxins	Auxin-activated signaling pathway. Phloem or xylem histogenesis
LOC18043360	protein DETOXIFICATION 24	-5.44975	0.595203	7.67098e-14	8.71821e-13	Regulation and Transport	Transport	Xenobiotics	Xenobiotic transmembrane transporter activity.
LOC18033777	cell division protein FtsZ homolog 2-1, chloroplastic	-5.44932	0.477529	9.55999e-21	1.61639e-19	Development	Chloroplast	NA	Exhibits GTPase activity. Component of the plastid division machinery that forms a contractile ring at the division site. Required for plastid division in a dose-dependent manner.
LOC18050572	WAT1-related protein At5g40240	-5.44677	0.388195	1.33732e-30	3.45481e-29	Regulation and Transport	Transport		transmembrane transporter activity
LOC18044878	protein LOL1	-5.4449	0.261172	3.11514e-65	2.1391e-63	Stress Responses	Cell death	NA	Positive regulator of reactive oxygen-induced cell death. May be involved in the repression of the copper/zinc superoxide dismutase CSD1 and CSD2 that detoxify accumulating superoxide before the reactive oxygen species (ROS) can trigger a cell death cascade. LSD1 and LOL1 have antagonistic effects on CSD1 and CSD2 accumulation to regulate oxidative stress-induced cell death.
LOC18055322	putative hydrolase YtaP	-5.42902	0.302465	7.203e-49	3.35515e-47	NA	Uncharacterized process	NA	Uncharacterized process
LOC18033714	hemoglobin-2	-5.41654	0.149089	2.33617e-194	1.21293e-191	NA	Uncharacterized process	NA	This molluscan globin lacks one of the heme-binding histidine residues found in most other globins.
LOC18047571	calcineurin B-like protein 7	-5.39822	0.549078	7.30421e-16	9.28267e-15	Signalling	Membranes, RE, signalling	NA	Acts as a calcium sensor. CBL proteins interact with CIPK serine-threonine protein kinases. Binding of a CBL protein to the regulatory NAF domain of a CIPK protein lead to the activation of the kinase in a calcium-dependent manner.
LOC112096177	disease resistance protein SUMM2-like	-5.39624	0.561114	3.86884e-15	4.72496e-14	Stress Responses	Plant defense	NA	Disease resistance protein
LOC18040909	uncharacterized LOC18040909	-5.39372	0.222856	5.99208e-87	6.60898e-85	NA	Uncharacterized process	NA	Uncharacterized process
LOC18034333	transcription factor FER-LIKE IRON DEFICIENCY-INDUCED TRANSCRIPTION FACTOR	-5.38718	0.62382	5.03819e-13	5.40292e-12	Stress Responses	Abiotic stress	Fe deficiency	Transcription factor. Essential protein involved in iron uptake responses. Regulates FRO2 at the level of mRNA accumulation and IRT1 at the level of protein accumulation. Confers enhanced iron mobilization responses at low iron supply.
LOC18044702	zinc finger protein ZAT1	5.38604	0.434313	1.11749e-24	2.26122e-23	Gene Expression	Transcription	NA	zinc finger protein
LOC18051814	probable inactive leucine-rich repeat receptor-like protein kinase At3g03770	-5.38247	0.475774	1.04787e-20	1.76891e-19	Signalling	Receptors, kinases, transduction	NA	probable inactive leucine-rich repeat receptor-like protein kinase
LOC18039780	protein SCARECROW	-5.38173	0.215936	7.37411e-92	9.12632e-90	Development	Organ development, differentiation	NA	Transcription factor required for quiescent center cells specification and maintenance of surrounding stem cells, and for the asymmetric cell division involved in radial pattern formation in roots. Essential for cell division but not differentiation of the ground tissue. Also required for normal shoot gravitropism. Regulates the radial organization of the shoot axial organs. Binds to the promoter…
LOC18037851	uncharacterized LOC18037851	-5.36835	0.389231	1.74749e-29	4.29052e-28	NA	Uncharacterized process	NA	Uncharacterized process
LOC18038263	non-specific lipid-transfer protein	5.35862	0.181624	2.12354e-128	4.86062e-126	NA	Uncharacterized process	NA	Uncharacterized process
LOC112098100	uncharacterized LOC112098100	-5.35572	0.430004	4.79842e-24	9.41419e-23	NA	Uncharacterized process	NA	Uncharacterized process
LOC18033215	carboxylesterase 1	-5.35197	0.246849	4.92516e-70	3.85448e-68	NA	Uncharacterized process	NA	Uncharacterized processes
LOC112096802	uncharacterized LOC112096802	-5.34819	0.366681	7.82648e-33	2.21251e-31	NA	Uncharacterized process	NA	Uncharacterized process
LOC112095677	alpha-copaene synthase-like	-5.34038	0.707633	2.82031e-10	2.53103e-09	Secondary Metabolism	Terpenoids	Sesquiterpenes	Alpha-copaene synthase = (E)-beta-farnesene synthase. Sesquiterpene cyclase catalyzing mainly the production of beta-farnesene and alpha-bergamotene in equal amounts from farnesyl diphosphate (terpenoids)
LOC18045123	leucine-rich repeat receptor protein kinase EMS1	-5.32274	0.669353	8.37144e-11	7.87463e-10	Development	Gametophyte	Fertilization	Receptor with a serine/threonine-protein kinase activity required for the specification of the correct number of male archesporial initials and for the subsequent specification of tapetal and middle cell layer identities. In seeds, required for enhancing cell size and the rate of embryonic development.
LOC112100713	leucoanthocyanidin reductase-like	-5.31517	0.305364	1.56003e-45	6.51145e-44	Secondary Metabolism	Flavonoids	Anthocyanis	Leucoanthocyanidin reductase = Catalyzes the synthesis of catechin from 3,4-cis-leucocyanidin. Also synthesizes afzelechin and gallocatechin.
LOC18041172	sugar transporter ERD6-like 10	-5.30796	0.270254	1.31887e-57	7.67069e-56	Regulation and Transport	Transport	Sugars	Sugar transporter.
LOC18039847	nodulation-signaling pathway 2 protein	5.30529	0.844864	4.15067e-08	3.17482e-07	Development	Organ development, differentiation	NA	Transcriptional regulator essential for Nod-factor-induced gene expression (Probable) (PubMed:17244637, PubMed:17071642).Acts downstream of calcium spiking and a calcium/calmodulin-dependent protein kinase required for activation of early nodulation gene expression (PubMed:17244637, PubMed:17071642, PubMed:24329948). Transcription factor involved in the induction of NIN and ENOD40 genes, which ar…
LOC112098957	uncharacterized LOC112098957	5.3047	0.733437	1.47428e-09	1.24734e-08	NA	Uncharacterized process	NA	Uncharacterized process
LOC18032540	transcription repressor OFP12	-5.30359	0.217707	2.06363e-87	2.28794e-85	Development	Organ development, differentiation	NA	Transcriptional repressor that regulates multiple aspects of plant growth and development through the regulation of BEL1-LIKE (BLH) and KNOX TALE (KNAT) homeodomain transcription factors.
LOC18043313	protein NRT1/ PTR FAMILY 7.3	-5.30086	0.293075	5.60188e-49	2.62082e-47	Regulation and Transport	Transport	Nitrate	Low-affinity proton-dependent bidirectional nitrate transporter. Involved in nitrate loading into xylem and not in nitrate uptake. Not involved in histidine or dipeptides transport.
LOC112095824	uncharacterized LOC112095824	-5.29787	0.359886	6.08783e-33	1.73251e-31	NA	Uncharacterized process	NA	Uncharacterized process
LOC112099303	uncharacterized LOC112099303	5.28667	0.774158	7.13165e-09	5.7201e-08	NA	Uncharacterized process	NA	Uncharacterized process
LOC18052443	EP1-like glycoprotein 2	-5.28593	1.22706	5.2381e-05	0.000305071	NA	Uncharacterized process	NA	Carbohydrate binding
LOC112099695	disease resistance-like protein DSC1	-5.27284	0.566816	2.31286e-14	2.69922e-13	Stress Responses	Plant defense	NA	TIR-NB-LRR receptor-like protein involved in plant defense. Acts as a trigger of hypersensitive response (HR). Functions as guard of CAMTA3, a negative regulator of immunity, during pathogen infection.
LOC112096011	28S ribosomal RNA	5.27232	0.901563	2.55879e-07	1.84766e-06	Gene Expression	Translation	Ribosomal proteins	Ribosomal protein
LOC18034510	CDPK-related kinase 5	-5.26698	0.211577	1.00503e-90	1.18856e-88	Signalling	Membranes, RE, signalling	NA	May play a role in signal transduction pathways that involve calcium as a second messenger.
LOC18048167	classical arabinogalactan protein 26	-5.25957	0.412488	3.43762e-25	7.10454e-24	Development	Organ development, differentiation	NA	Proteoglycan that seems to be implicated in diverse developmental roles such as differentiation, cell-cell recognition, embryogenesis and programmed cell death.
LOC112100286	uncharacterized LOC112100286	5.25584	1.09986	1.22572e-05	7.62921e-05	NA	Uncharacterized process	NA	Uncharacterized process
LOC18050261	pectinesterase	-5.24857	0.134314	5.66812e-220	4.02191e-217	Cellullar Growth	Cell wall	NA	Acts in the modification of cell walls via demethylesterification of cell wall pectin (By similarity).Demethylates protein phosphatase 2A (PP2A) that have been reversibly carboxymethylated by LCMT1. Acts as negative regulators of genes involved in salt stress response (PubMed:28741704).
LOC18054168	pathogenesis-related protein PR-1	-5.24519	0.166842	3.14085e-143	8.68303e-141	Stress Responses	Plant defense	NA	Disease resistance protein
LOC18040378	uncharacterized LOC18040378	5.24307	0.195646	3.70178e-105	5.83701e-103	NA	Uncharacterized process	NA	Uncharacterized process
LOC18036440	transcription factor HHO5	5.22635	0.202492	4.62877e-97	6.12004e-95	Development	Flowering	NA	Transcriptional repressor that functions with ULT1 in a pathway which regulates floral meristem homeostasis and organ number in the flower. Binds specifically to the DNA sequence motif 5'-GTAGATTCCT-3' of WUS promoter, and may be involved in direct regulation of WUS expression. Binds specifically to the DNA sequence motif 5'-AAGAATCTTT-3' found in the promoters of AG and the NAC domain genes CUC1…
LOC18047874	uncharacterized LOC18047874	-5.20983	0.329675	1.83571e-37	5.95681e-36	NA	Uncharacterized process	NA	Uncharacterized process
LOC18047164	GATA transcription factor 4	5.20305	0.201307	3.19223e-97	4.27378e-95	Regulation and Transport	Light signalling	NA	Transcriptional activator that specifically binds 5'-GATA-3' or 5'-GAT-3' motifs within gene promoters. May be involved in the regulation of some light-responsive genes.
LOC18044391	beta-D-glucosyl crocetin beta-1,6-glucosyltransferase	5.19697	0.320252	4.62809e-40	1.6338e-38	Secondary Metabolism	Terpenoids	Carotenoids	Glucosyltransferase catalyzing the beta 1-6 glucosylation of the sugar moiety of crocetin glucosyl esters to produce crocetin gentiobiosyl esters. Weak activity toward curcumin glucosides, but no activity with flavonoid glucosides, coumarin glucosides, 4-nitrophenyl glucoside or crocetin. Involved with UGT75L6 in sequential glycosylation of crocetin to crocin (bis(beta-D-gentiobiosyl) crocetin).C…
LOC18042325	probable acyl-activating enzyme 9	5.19296	0.490558	3.43455e-18	5.0561e-17	NA	Uncharacterized process	NA	May act as an acid--thiol ligase that activates carboxylic acids by forming acyl-CoAs.
LOC18035870	monooxygenase 2	5.19215	0.36971	2.43464e-30	6.22162e-29	Stress Responses	Redox	Oxidoreductases	Monooxygenase activity
LOC18048525	TMV resistance protein N	-5.18984	0.227695	5.07936e-76	4.54304e-74	Stress Responses	Plant defense	NA	Disease resistance protein
LOC18033697	B3 domain-containing protein Os01g0234100	-5.18231	0.564817	1.05117e-13	1.1833e-12	Gene Expression	Transcription	NA	DNA-binding transcription factor activity
LOC112098092	zinc finger BED domain-containing protein RICESLEEPER 1-like	5.17679	0.699774	4.07152e-10	3.59331e-09	Development	Organ development, differentiation	NA	Transposase-like protein that is essential for plant growth and development. May regulate global gene expression by recruiting other cellular factors.
LOC18032733	uncharacterized LOC18032733	-5.17649	0.366684	1.93145e-30	4.96554e-29	NA	Uncharacterized process	NA	Uncharacterized process
LOC18033003	serine/threonine-protein kinase BRI1-like 2	-5.17479	0.293587	3.74487e-46	1.57855e-44	Development	Organ development, differentiation	NA	Receptor with a serine/threonine-protein kinase activity, which may transduce extracellular spatial and temporal signals into downstream cell differentiation responses in provascular and procambial cells. In contrast to BRI1, BRL1 and BRL3, it does not bind brassinolide.
LOC18047480	protein SRG1	5.16648	0.201796	1.24807e-95	1.62992e-93	Stress Responses	Plant defense	NA	S-nitrosylation of the zinc finger protein SRG1 regulates plant immunity. Unlike the homologous protein NCS1 of Coptis japonica, SRG1 has no norcoclaurine synthase activity.
LOC18049217	probable LRR receptor-like serine/threonine-protein kinase At3g47570	-5.1481	0.672075	2.98072e-10	2.66936e-09	Signalling	Receptors, kinases, transduction	NA	probable LRR receptor-like serine/threonine-protein kinase
LOC112099851	protein SRG1-like	5.14454	0.396532	4.96816e-26	1.05863e-24	Regulation and Transport	Hormonal regulation	Jasmonic acid	Oxidoreductase activity. Regulation of jasmonic acid mediated signaling pathway
LOC112098229	uncharacterized LOC112098229	-5.14096	0.544692	1.5475e-14	1.82807e-13	NA	Uncharacterized process	NA	Uncharacterized process
LOC18042560	transcription factor bHLH96	-5.12601	0.427569	1.41002e-22	2.59645e-21	Gene Expression	Transcription	NA	DNA-binding transcription factor activity
LOC18054752	G-type lectin S-receptor-like serine/threonine-protein kinase At4g27290	5.11951	0.407373	2.4532e-24	4.85328e-23	Signalling	Receptors, kinases, transduction	NA	G-type lectin S-receptor-like serine/threonine-protein kinase
LOC18032628	TIMELESS-interacting protein	-5.11042	0.381979	3.07055e-27	6.87305e-26	Cellullar Growth	Cell division	DNA replication	Plays an important role in the control of DNA replication and the maintenance of replication fork stability. Important for cell survival after DNA damage or replication stress. May be specifically required for the ATR-CHEK1 pathway in the replication checkpoint induced by hydroxyurea or ultraviolet light. Forms a complex with TIMELESS and this complex regulates DNA replication processes under bot…
LOC18051435	uncharacterized LOC18051435	-5.081	0.401712	1.77509e-24	3.53473e-23	NA	Uncharacterized process	NA	Uncharacterized process
LOC18054538	uncharacterized LOC18054538	5.06498	0.485452	5.21472e-17	7.15704e-16	NA	Uncharacterized process	NA	Uncharacterized process
LOC18043965	DNA ligase 1	5.06097	0.168538	4.74744e-129	1.09846e-126	Gene Expression	Nucleic acids processing	NA	DNA ligase that seals nicks in double-stranded DNA during DNA replication, DNA recombination and DNA repair.
LOC18043359	axial regulator YABBY 4	-5.05821	0.484155	3.06676e-17	4.26401e-16	Development	Gametophyte	Fertilization	Essential for the formation and the abaxial-adaxial asymmetric growth of the ovule outer integument.
LOC18046562	glycine-rich protein 23	-5.05599	0.105742	0	0	NA	Uncharacterized process	NA	Uncharacterized process
LOC18045779	uncharacterized LOC18045779	5.04241	0.354447	8.37623e-31	2.18779e-29	NA	Uncharacterized process	NA	Uncharacterized process
LOC18054089	protein DETOXIFICATION 19	-5.01552	0.119738	4.95741e-247	5.27642e-244	Regulation and Transport	Transport	Xenobiotics	Required for protection of the roots from inhibitory compounds. When expressed in a heterologous system, confers resistance to tetramethylammonium chloride.
LOC18038735	PH, RCC1 and FYVE domains-containing protein 1	-5.00885	0.27847	2.45436e-47	1.08394e-45	Signalling	Membranes, RE, signalling	NA	Binds to phosphatidic acid and to phosphoinositides such as PtdIns3P, PtdIns(3,4)P2, PtdIns(3,4,5)P3 and PtdIns(4,5)P2. Catalyzes guanine nucleotide exchange on specific Rab proteins.
LOC18039298	uncharacterized LOC18039298	-5.0031	0.160586	2.70393e-138	7.10599e-136	NA	Uncharacterized process	NA	Uncharacterized process
LOC18033115	receptor-like protein EIX2	-5.00065	0.541101	4.29948e-14	4.94185e-13	Stress Responses	Plant defense	NA	Involved in plant defense. Confers resistance to the fungal pathogen T.viride through recognition of the EIX elicitor protein.
LOC18042467	receptor-like protein 9DC3	4.99562	0.429747	2.46949e-21	4.27382e-20	Stress Responses	Plant defense	NA	Involved in plant defense. Confers resistance to the fungal pathogen C.fulvum through recognition of the AVR9 elicitor protein.
LOC18055047	lachrymatory-factor synthase	-4.99454	0.224621	3.59826e-71	2.92351e-69	NA	Uncharacterized process	NA	Produces lacrymatory factor (propanthial S-oxide) from 1-propenylsulphenic acid, an unstable compound resulting from the degradation of trans-1-propenyl-L-cysteine sulphoxide (PRENCSO) by alliinase.
LOC18053646	beta-amyrin synthase	4.97864	0.409578	4.13098e-23	7.80268e-22	Secondary Metabolism	Terpenoids	Triterpenes	Converts oxidosqualene to beta-amyrin. Triterpenoid biosynthetic process
LOC18038685	ABC transporter G family member 14	-4.97748	0.30909	3.4872e-38	1.15807e-36	Regulation and Transport	Hormonal regulation	Cytokinins	Positive regulator of plant growth which acts as an efflux pump involved in the major root-to-shoot (acropetal) long-distance cytokinin (CK) transport via the xylem sap (PubMed:24513716, PubMed:24778257, PubMed:26517905, PubMed:28398838).Together with ABCG9 and ABCG11, required for vascular development by regulating lipid/sterol homeostasis (PubMed:24112720).Involved in CK-dependent responses to …
LOC112098474	putative disease resistance RPP13-like protein 1	-4.97682	0.180271	1.9973e-108	3.37433e-106	Stress Responses	Plant defense	NA	Potential disease resistance protein.
LOC112098486	(R)-limonene synthase 1, chloroplastic-like	-4.97577	0.338817	1.22366e-32	3.44097e-31	Secondary Metabolism	Terpenoids	Monoterpenes	Catalyzes the conversion of geranyl diphosphate to (+)-(4R)-limonene (PubMed:28272875, PubMed:28272876).Produces exclusively the (+)-enantiomer (PubMed:28272875).Can use neryl diphosphate as substrate (PubMed:28272876).Has no activity with farnesyl diphosphate (PubMed:28272875).
LOC18043584	probable methyltransferase At1g27930	-4.96767	0.342223	2.19523e-31	5.88538e-30	NA	Uncharacterized process	NA	Protein methylation
LOC18034884	protein DMR6-LIKE OXYGENASE 1	4.96111	0.396004	3.84442e-24	7.57743e-23	Regulation and Transport	Hormonal regulation	Salicylic acid	Converts salicylic acid (SA) to both 2,3-dihydroxybenzoic acid (2,3-DHBA) and 2,5-DHBA in vitro but only 2,3-DHBA in vivo. Component of a negative feedback regulation system of SA levels during senescence. Regulates both onset and progression of leaf senescence (PubMed:23959884).Negative regulator of defense against Hyaloperonospora arabidopsidis (PubMed:25376907).
LOC18050842	coumaroyl-CoA:anthocyanidin 3-O-glucoside-6''-O-coumaroyltransferase 2	4.96019	0.459894	2.05072e-18	3.05057e-17	Secondary Metabolism	Flavonoids	Anthocyanis	Involved in the acylation of the 6'' position of the 3-O-glucose residue of anthocyanin. Also able to use flavonol 3-glucosides as the acyl acceptor.
LOC112099316	uncharacterized LOC112099316	-4.95215	0.30393	5.18877e-39	1.75881e-37	NA	Uncharacterized process	NA	Uncharacterized process
LOC112098064	disease resistance protein At4g27190-like	4.94228	0.574277	2.00994e-12	2.08e-11	Stress Responses	Plant defense	NA	Disease resistance protein
LOC18045785	chlorophyll a-b binding protein P4, chloroplastic	-4.94038	0.249962	6.81585e-57	3.85875e-55	Development	Chloroplast	Photosynthesis	Photosynthesis, chloroplast
LOC18040168	uncharacterized LOC18040168	-4.93447	0.246738	1.22651e-57	7.15309e-56	NA	Uncharacterized process	NA	Uncharacterized process
LOC18053549	tetraspanin-19	-4.92762	0.380898	1.33764e-25	2.8109e-24	NA	Uncharacterized process	NA	Uncharacterized process
LOC18055589	alpha-aminoadipic semialdehyde synthase	-4.92576	0.480785	1.71317e-16	2.26651e-15	NA	Amino acid metabolism	NA	Bifunctional enzyme that catalyzes the first two steps in lysine degradation. The N-terminal and the C-terminal contain lysine-oxoglutarate reductase and saccharopine dehydrogenase activity, respectively. Negatively regulates free Lys accumulation in seeds.
LOC18049409	germin-like protein subfamily 1 member 17	4.91621	0.379061	2.60952e-25	5.4353e-24	Stress Responses	Plant defense	NA	May play a role in plant defense. Probably has no oxalate oxidase activity even if the active site is conserved.
LOC112098124	putative leucine-rich repeat receptor-like serine/threonine-protein kinase At2g24130	4.91057	0.632486	1.59218e-10	1.46341e-09	NA	Uncharacterized process	NA	Uncharacterized process
LOC18043307	MLO-like protein 12	-4.90972	0.516143	2.26506e-14	2.6478e-13	Stress Responses	Plant defense	NA	May be involved in modulation of pathogen defense and leaf cell death. Activity seems to be regulated by Ca2+-dependent calmodulin binding and seems not to require heterotrimeric G proteins (By similarity).
LOC18050740	transcription activator GLK1	-4.90775	0.208014	1.90487e-79	1.80218e-77	Development	Chloroplast	NA	Transcriptional activator that functions with GLK2 to promote chloroplast development. Acts as an activator of nuclear photosynthetic genes involved in chlorophyll biosynthesis, light harvesting, and electron transport. Acts in a cell-autonomous manner to coordinate and maintain the photosynthetic apparatus within individual cells. May function in photosynthetic capacity optimization by integrati…
LOC18052127	dirigent protein 22	-4.90742	0.207798	1.36476e-79	1.29695e-77	NA	Lignan metabolism	NA	Dirigent proteins impart stereoselectivity on the phenoxy radical-coupling reaction, yielding optically active lignans from two molecules of coniferyl alcohol in the biosynthesis of lignans, flavonolignans, and alkaloids and thus plays a central role in plant secondary metabolism.
LOC18035843	putative leucine-rich repeat receptor-like protein kinase At2g19210	4.90174	0.531519	4.51447e-14	5.18336e-13	NA	Uncharacterized process	NA	Uncharacterized process
LOC112097788	putative disease resistance protein RGA3	4.89667	0.424486	9.50466e-21	1.60831e-19	Stress Responses	Plant defense	NA	Belongs to a four-gene family located at the same locus. Although the four genes are expressed in the resistant haplotype, only RGA2 confers the resistance to P.infestans. In the susceptible haplotype, RGA1 and RGA3 are likely to be pseudogenes created by deletions and mutations, while RGA2 contains also several modifications.
LOC18044004	putative invertase inhibitor	-4.8958	0.466181	1.63361e-17	2.3106e-16	Primary Metabolism	Sugar metabolism	Invertases	Invertase inhibitor (Probable).
LOC18044262	protein BIG GRAIN 1-like E	-4.8927	0.206146	4.84367e-80	4.64447e-78	Regulation and Transport	Hormonal regulation	Auxins	Involved in auxin transport. Regulator of the auxin signaling pathway.
LOC18050123	uncharacterized LOC18050123	-4.89114	0.255383	1.16479e-52	5.98912e-51	NA	Uncharacterized process	NA	Uncharacterized process
LOC18051320	plasma membrane-associated cation-binding protein 1	4.88475	0.125676	1.46105e-210	9.7192e-208	Signalling	Membranes, RE, signalling	NA	May be involved in intracellular signaling through interaction with PtdInsPs and calmodulin (CaM); may keep PtdInsPs attached to the plasma membrane until Ca2+-CaM reaches a competitive concentration subsequent to an increase triggered by a stimulus, thus leading to PtdInsPs release and subsequent activation of InsPs-dependent signaling cascade. Interacts competitively at the N-terminus with calc…
LOC18053770	growth-regulating factor 6	-4.88048	0.137465	8.43351e-176	3.74009e-173	Cellullar Growth	Cell expansion	NA	Transcription activator that plays a role in the regulation of cell expansion in leaf and cotyledons tissues.
LOC18031628	cyclic nucleotide-gated ion channel 1	-4.87739	0.475991	1.45701e-16	1.93483e-15	Signalling	Membranes, RE, signalling	NA	Acts as cyclic nucleotide-gated ion channel. Can be activated by cyclic AMP which leads to an opening of the cation channel. May be responsible for cAMP-induced calcium entry in cells and thus should be involved in the calcium signal transduction. Could transport K+, Na+ and Pb2+.
LOC18047768	hypersensitive-induced response protein 1	-4.87055	0.435137	2.36966e-19	3.73099e-18	Stress Responses	Plant defense	NA	Positive regulator of hypersensitive response (HR)-like cell death. May be involved in potassium ion channel regulation.
LOC18047896	1-aminocyclopropane-1-carboxylate oxidase homolog 1	4.87012	0.393188	1.81092e-23	3.46665e-22	Stress Responses	Redox	Oxidoreductases	2-oxoglutarate (2OG) and Fe(II)-dependent oxygenase superfamily protein
LOC18032723	21 kDa protein	-4.866	0.180447	7.39902e-103	1.10142e-100	NA	Uncharacterized process	NA	Uncharacterized process
LOC18034463	L-ascorbate oxidase homolog	-4.86009	0.395715	6.49804e-23	1.21443e-21	Development	Gametophyte	Fertilization	Probable oxidoreductase that may be involved in pollen tube growth.
LOC18054309	leucine-rich repeat receptor-like protein kinase TDR	-4.85921	0.33566	8.02213e-31	2.10046e-29	Development	Organ development, differentiation	NA	Acts with CLE41p and CLE44p peptides as a ligand-receptor pair in a signal transduction pathway involved in the regulation of procambium maintenance and polarity during vascular-tissue development (PubMed:17570668, PubMed:18812507, PubMed:27055373).Mediates repression of tracheary element differentiation and the promotion of procambial cells formation and polar division adjacent to phloem cells i…
LOC18041775	glutathione S-transferase zeta class	4.85511	0.359788	2.70733e-27	6.07922e-26	Stress Responses	Redox	Oxidoreductases	Glutathione transferase activity
LOC18049742	protein NRT1/ PTR FAMILY 7.2	4.84551	0.545136	4.38723e-13	4.73345e-12	Regulation and Transport	Transport	Nitrate	Low-affinity nitrate transporter. Involved in nitrate removal from xylem sap. Not involved in oligopeptides transport.
LOC18040326	probable LRR receptor-like serine/threonine-protein kinase At4g36180	-4.84153	0.32025	1.61462e-33	4.689e-32	Signalling	Receptors, kinases, transduction	NA	probable LRR receptor-like serine/threonine-protein kinase
LOC18046162	uncharacterized LOC18046162	-4.83828	0.469245	1.37006e-16	1.8262e-15	NA	Uncharacterized process	NA	Uncharacterized process
LOC18031231	GDSL esterase/lipase At3g27950	4.83371	0.338426	1.93431e-30	4.96692e-29	NA	Uncharacterized process	NA	Lipid catabolic process
LOC18032223	cellulose synthase-like protein G2	-4.83338	0.214812	1.88629e-71	1.53844e-69	Cellullar Growth	Cell wall	NA	Thought to be a Golgi-localized beta-glycan synthase that polymerize the backbones of noncellulosic polysaccharides (hemicelluloses) of plant cell wall.
LOC18054046	6-hydroxynicotinate 3-monooxygenase	-4.82984	0.308917	3.79093e-36	1.16615e-34	Secondary Metabolism	Alkaloids	Nicotine	Flavin-dependent monooxygenase (FMO) that catalyzes the decarboxylative hydroxylation of 6-hydroxynicotinic acid (6-HNA) to 2,5-dihydroxypyridine (2,5-DHP) with concomitant oxidation of NADH, a step in the aerobic nicotinate degradation pathway. Uses NADH in preference to NADPH as an electron donor.
LOC18053194	G-type lectin S-receptor-like serine/threonine-protein kinase At2g19130	4.82692	0.544807	4.82465e-13	5.18437e-12	Signalling	Receptors, kinases, transduction	NA	G-type lectin S-receptor-like serine/threonine-protein kinase
LOC18031336	potassium channel SKOR	4.82575	0.291755	8.03092e-40	2.81638e-38	Regulation and Transport	Transport	Potassium	Highly selective outward-rectifying potassium channel. Involved in potassium release into the xylem sap toward the shoots. Assuming opened or closed conformations in response to the voltage difference across the membrane, the channel is activated by depolarization. The voltage-dependence of the channel is abolished by internal or external acidification. May interact with the cytoskeleton or with …
LOC18052204	nudix hydrolase 2	-4.81967	0.451005	1.02863e-17	1.47352e-16	NA	Uncharacterized process	NA	Probably mediates the hydrolysis of some nucleoside diphosphate derivatives. In vitro, it can use both NADH and ADP-ribose as substrates; however the relevance of such substrates in vivo is unclear.
LOC18049003	translocator protein homolog	4.81965	0.180614	7.97777e-100	1.12465e-97	Stress Responses	Abiotic stress	Salt	Stress-induced membrane protein that can bind heme and may play a role in the transport of tetrapyrrole intermediates during salt stress and contribute to the detoxification of highly reactive porphyrins in the cytoplasm.
LOC18041487	protein WALLS ARE THIN 1	-4.8185	0.533999	4.62945e-13	4.98216e-12	Cellullar Growth	Cell wall	NA	Required for secondary wall formation in fibers, especially in short days conditions. Promotes indole metabolism and transport (e.g. tryptophan, neoglucobrassicin and auxin (indole-3-acetic acid)). May prevent salicylic-acid (SA) accumulation.
LOC112097690	methionine S-methyltransferase-like	-4.81482	0.488541	1.96333e-15	2.43978e-14	NA	S-adenosylmethionine metabolism	NA	Catalyzes the S-methylmethionine (SMM) biosynthesis from adenosyl-L-homocysteine (AdoMet) and methionine. SMM biosynthesis (by MMT1) and degradation (by HMT-1, HMT-2 and HMT-3) constitute the SMM cycle in plants, which is probably required to achieve short term control of AdoMet level. Also able to catalyze the selenium-methylmethionine (SeMM) from AdoMet and selenium-methionine (SeMet). May play…
LOC18047428	14 kDa proline-rich protein DC2.15	-4.81035	0.135057	1.303e-175	5.6606e-173	Regulation and Transport	Hormonal regulation	Auxins	May be connected with the initiation of embryogenesis or with the metabolic changes produced by the removal of auxins.
LOC18041806	probable histone H2A.5	-4.80703	0.19328	1.52479e-86	1.66452e-84	Gene Expression	Chromatin, histones	NA	Probable histone H2A.5
LOC18055004	transcription factor bHLH35	-4.80688	0.471845	1.73785e-16	2.29495e-15	Gene Expression	Transcription	NA	DNA-binding transcription factor activity
LOC18051764	protein POLLENLESS 3	-4.8039	0.491675	5.13532e-15	6.22171e-14	Development	Gametophyte	Fertilization	Essential for male fertility, especially for microspore and pollen grain production (PubMed:9750346, Ref. 2).Involved in the regulation of cell division after male meiosis I and II to facilitate exit from meiosis and transition to G1 (PubMed:9451956, PubMed:21119056).
LOC18046698	protein DOWNY MILDEW RESISTANCE 6	4.79756	0.246303	1.63324e-54	8.73535e-53	Regulation and Transport	Hormonal regulation	Salicylic acid	Converts salicylic acid (SA) to 2,3-dihydroxybenzoic acid (2,3-DHBA) (By similarity).Suppressor of immunity. Regulates negatively defense associated genes expression (e.g. PR-1, PR-2, and PR-5) (PubMed:18248595, PubMed:25376907).Negative regulator of defense against Hyaloperonospora arabidopsidis (PubMed:25376907).
LOC18043537	MLP-like protein 423	4.78269	0.191286	4.15325e-88	4.6778e-86	Regulation and Transport	Hormonal regulation	Abscicic acid	abscisic acid-activated signaling pathway
LOC18048532	TMV resistance protein N	-4.77657	0.226907	1.09021e-62	7.1849e-61	Stress Responses	Plant defense	NA	Disease resistance protein
LOC18055854	aspartic proteinase CDR1	4.77122	0.623822	3.69333e-10	3.26902e-09	Regulation and Transport	Hormonal regulation	Salicylic acid	Involved in salicylic acid-dependent inducible resistance responses. May release an endogenous peptide elicitor required for the activation of inducible resistance mechanisms. Possesses protease activity in vitro.
LOC18043758	uncharacterized LOC18043758	4.75407	0.447437	1.41556e-17	2.01425e-16	NA	Uncharacterized process	NA	Uncharacterized process
LOC18041198	cytochrome P450 CYP82D47	4.75127	0.504345	2.50999e-14	2.9149e-13	Stress Responses	Redox	Oxidoreductases	Probable heme-thiolate monooxygenase.
LOC18037995	uncharacterized acetyltransferase At3g50280	-4.74889	0.256509	1.1378e-48	5.27675e-47	NA	Uncharacterized process	NA	Uncharacterized process
LOC18047672	probable phosphoinositide phosphatase SAC9	-4.74348	0.353093	8.90508e-27	1.95627e-25	Signalling	Membranes, RE, signalling	NA	Probable phosphoinositide phosphatase that could be involved in stress signaling.
LOC112100742	dehydrin HIRD11-like	4.73554	0.157116	1.17533e-125	2.66161e-123	NA	Uncharacterized process	NA	Intrinsically disordered and metal-binding protein. Binds to the divalent cations cobalt, nickel, copper and zinc, but not to magnesium, calcium, manganese or cadmium (Ref. 8). Binding to metal ions decreases disordered state, decreases susceptibility to trypsin and promotes self-association. Can reduce the formation of reactive oxygen species (ROS) in a copper-ascorbate in vitro system (PubMed:2…
LOC18051499	uncharacterized LOC18051499	4.73183	0.384757	9.16443e-23	1.70081e-21	NA	Uncharacterized process	NA	Uncharacterized process
LOC18036005	ankyrin repeat-containing protein ITN1	-4.72561	0.274519	3.36601e-42	1.27269e-40	Regulation and Transport	Hormonal regulation	Abscicic acid	Involved in salt stress tolerance. May act through abscisic acid (ABA) signaling pathways and promote reactive oxygen species (ROS) production.
LOC18036526	tubby-like protein 8	-4.72462	0.442949	2.0109e-17	2.82548e-16	NA	Uncharacterized process	NA	Uncharacterized process
LOC112100315	uncharacterized LOC112100315	-4.72105	0.435657	2.76868e-18	4.09284e-17	NA	Uncharacterized process	NA	Uncharacterized process
LOC112095843	uncharacterized LOC112095843	4.72029	0.333762	1.24046e-29	3.07043e-28	NA	Uncharacterized process	NA	Uncharacterized process
LOC18036784	dormancy-associated protein homolog 4	4.71998	0.25742	5.60579e-48	2.51752e-46	NA	Uncharacterized process	NA	Uncharacterized process
LOC18037834	transcription factor bHLH61	-4.7142	0.183618	2.17362e-91	2.62897e-89	Gene Expression	Transcription	NA	DNA-binding transcription factor activity
LOC18035420	protein DMR6-LIKE OXYGENASE 2	4.70284	0.223217	1.37298e-62	9.02055e-61	Regulation and Transport	Hormonal regulation	Salicylic acid	Converts salicylic acid (SA) to 2,3-dihydroxybenzoic acid (2,3-DHBA) (By similarity).Negative regulator of defense against Hyaloperonospora arabidopsidis (PubMed:25376907).
LOC18053412	zinc finger CCCH domain-containing protein 43	-4.69987	0.390843	9.51467e-22	1.68642e-20	Gene Expression	Transcription	NA	zinc finger CCCH domain-containing protein
LOC18032370	leucine-rich repeat extensin-like protein 6	4.69957	0.29048	6.00289e-38	1.98114e-36	Cellullar Growth	Cell wall	NA	Modulates cell morphogenesis by regulating cell wall formation and assembly, and/or growth polarization.
LOC18047387	cytochrome P450 71A1	4.68973	0.444514	1.57902e-17	2.23637e-16	Secondary Metabolism	Phenylpropanoids	NA	Involved in the metabolism of compounds associated with the development of flavor in the ripening fruit process, possibly by acting as trans-cinnamic acid 4-hydrolase.
LOC18039319	putative homeobox-leucine zipper protein ATHB-51	-4.68903	0.195119	4.61215e-80	4.44248e-78	Gene Expression	Transcription	NA	Putative transcription factor.
LOC18047553	oligopeptide transporter 7	-4.68308	0.408866	9.60913e-20	1.54962e-18	Regulation and Transport	Transport	Oligopeptides	Involved in the translocation of tetra- and pentapeptides across the cellular membrane in an energy-dependent manner. May also transport cadmium complexes.
LOC112099066	phosphatidylinositol-3-phosphatase myotubularin-1-like	-4.67346	0.242828	3.75465e-52	1.91667e-50	Signalling	Membranes, RE, signalling	NA	Phosphatase with phosphoinositide 3'-phosphatase activity that can use phosphatidylinositol-3-phosphate (PtdIns3P) and phosphatidylinositol-3,5-diphosphate (PtdIns3,5P2) as substrates and produces phosphatidylinositol-5-phosphate (PtdIns5P); participates in pathway(s) that transfer gene regulatory signals to the nucleus. Required for recovery after water deprivation, via the accumulation of PtdIn…
LOC18055410	protein ACCELERATED CELL DEATH 6	-4.67342	0.142516	4.25684e-147	1.27627e-144	Stress Responses	Cell death	NA	ACD6. ankyrin repeat family protein;(source:Araport11).TAIR Curator Summary encodes a novel protein with putative ankyrin and transmembrane regions. It is a member of one of the largest uncharacterized gene families in higher plants. The gene is involved in resistance to Pseudomonas syringae.TAIR Short Description ankyrin repeat family protein. Dose-dependent activator of the defense response aga…
LOC18052816	uncharacterized LOC18052816	-4.67329	0.51234	3.19758e-13	3.49061e-12	NA	Uncharacterized process	NA	Uncharacterized process
LOC18036901	cytochrome P450 CYP736A12	4.66359	0.941036	1.27255e-05	7.90911e-05	Stress Responses	Redox	Oxidoreductases	Probable heme-thiolate monooxygenase.
LOC18051932	LRR receptor-like serine/threonine-protein kinase RPK2	-4.66316	0.261149	2.25375e-45	9.33376e-44	Development	Gametophyte	Fertilization	Key regulator of anther development (e.g. lignification pattern), including tapetum degradation during pollen maturation (e.g. germination capacity). Together with RPK1, required for pattern formation along the radial axis (e.g. the apical embryonic domain cell types that generate cotyledon primordia), and the apical-basal axis (e.g. differentiation of the basal pole during early embryogenesis).
LOC18042369	7-deoxyloganetin glucosyltransferase	4.66178	0.337839	2.65492e-28	6.23101e-27	Secondary Metabolism	Alkaloids	Secologanin	Secologanin synthesis. Secologanin is a secoiridoid monoterpene synthesized from geranyl pyrophosphate in the mevalonate pathway. Secologanin then proceeds with dopamine or tryptamine to form ipecac and terpene indole alkaloids, respectively. This iridoid glucosyltransferase acting exclusively on 7-deoxyloganetin. No activity with 7-deoxyloganetic acid.
LOC112096218	peroxiredoxin-2-like	4.66042	0.276759	1.9926e-40	7.15286e-39	Stress Responses	Redox	Oxidoreductases	Thiol-specific peroxidase that catalyzes the reduction of hydrogen peroxide and organic hydroperoxides to water and alcohols, respectively. Plays a role in cell protection against oxidative stress by detoxifying peroxides and as sensor of hydrogen peroxide-mediated signaling events. Might participate in the signaling cascades of growth factors and tumor necrosis factor-alpha by regulating the int…
LOC18038067	F-box protein At2g02240	4.65822	0.248226	9.71086e-50	4.64528e-48	Development	Seed, embryo development	NA	Embryo development ending in seed dormancy
LOC18055352	EG45-like domain containing protein 2	4.65785	0.292483	1.25479e-36	3.93964e-35	Regulation and Transport	Transport	Water	Plays a systemic role in water and solute homeostasis.
LOC18054050	aurachin C monooxygenase/isomerase	4.65385	0.61308	4.60475e-10	4.03048e-09	NA	Uncharacterized process	NA	Catalyzes the initial step in the conversion of aurachin C to aurachin B. Catalyzes the epoxidation of the C2-C3 double bond of aurachin C, which is followed by a semipinacol rearrangement, causing migration of the farnesyl group from C3 to C4. Accepts both NADH and NADPH, but has a preference for NADH. A third group o f antibiotics, the aurachins, have been isolated from the m yxobacterium Stigm…
LOC18037022	nodulation receptor kinase	4.64392	0.304057	1.61067e-33	4.68394e-32	NA	Symbiotic interaction	NA	Involved in the perception of symbiotic fungi and bacteria. Part of the perception/transduction system leading to nodulation or mycorrhizal infection (PubMed:12087406, PubMed:12087405).
LOC18033738	60S ribosomal protein L14-1	4.63837	0.412325	3.31521e-19	5.15869e-18	Gene Expression	Translation	Ribosomal proteins	Ribosomal protein
LOC18050359	cytochrome P450 83B1	-4.6272	0.3781	3.82189e-22	6.90633e-21	Regulation and Transport	Hormonal regulation	Auxins	Involved in the metabolism of aromatic oximes. Catalyzes the oxime metabolizing step in indole glucosinolate biosynthesis by converting indole-3-acetaldoxime into indole-3-S-alkyl-thiohydroximate. Probably required for glucosinolate activation in response to pathogens. Functions in auxin homeostasis because indole-3-acetaldoxime also serves as a precursor for auxin biosynthesis. Specifically meta…
LOC18033781	NDR1/HIN1-like protein 1	-4.62033	0.271299	5.37048e-41	1.95088e-39	Stress Responses	Plant defense	NA	May play a role in plant immunity.
LOC18042735	UDP-glycosyltransferase 83A1	4.61578	0.317959	2.02781e-30	5.20073e-29	NA	Uncharacterized process	NA	UDP-glycosyltransferase activity
LOC18045502	transcription factor PAR1	-4.61571	0.23936	4.03114e-52	2.05289e-50	Regulation and Transport	Hormonal regulation	Auxins	Atypical bHLH transcription factor that acts as negative regulator of a variety of shade avoidance syndrome (SAS) responses, including seedling elongation and photosynthetic pigment accumulation. Acts as direct transcriptional repressor of two auxin-responsive genes, SAUR15 and SAUR68. May function in integrating shade and hormone transcriptional networks in response to light and auxin changes.
LOC18050317	uncharacterized LOC18050317	-4.61403	0.410942	4.05076e-19	6.26205e-18	NA	Uncharacterized process	NA	Uncharacterized process
LOC18037723	uncharacterized protein At5g65660	4.61238	0.292833	9.51011e-36	2.89616e-34	NA	Uncharacterized process	NA	Uncharacterized process
LOC18054111	uncharacterized LOC18054111	-4.60506	0.100564	2.42864e-282	3.44657e-279	NA	Uncharacterized process	NA	Uncharacterized process
LOC112098420	putative disease resistance RPP13-like protein 1	-4.60042	0.166584	6.76882e-104	1.0366e-101	Stress Responses	Plant defense	NA	Potential disease resistance protein.
LOC18055837	probable serine incorporator	-4.59455	0.331497	7.89794e-28	1.81755e-26	Signalling	Membranes, RE, signalling	NA	Enhances the incorporation of serine into phosphatidylserine and sphingolipids.
LOC18043425	protein JINGUBANG	-4.59017	0.238346	1.0139e-51	5.10236e-50	Development	Gametophyte	Fertilization	Negative regulator of pollen germination (PubMed:27468890).Prevents pollination in moist environments by inhibiting jasmonic acid synthesis (PubMed:27468890).-Stabilizes pollen tube growth (PubMed:27468890).
LOC18050348	flavonol 3-sulfotransferase	-4.58727	0.422309	6.79031e-18	9.85313e-17	Secondary Metabolism	Flavonoids	Flavonols	Sulfotransferase that utilizes 3'-phospho-5'-adenylyl sulfate (PAPS) as sulfonate donor to catalyze the sulfate conjugation of quercetin, rhamnetin and isorhamnetin but not kaempferol. O-sulfation of position 3 of flavonol. May play a role in auxin transport.
LOC18052315	protein BREAST CANCER SUSCEPTIBILITY 1 homolog	-4.57953	0.258089	3.14489e-44	1.25366e-42	Cellullar Growth	Cell division	DNA repair	Plays a role in DNA repair and in cell-cycle control. Required for the repair of DNA double-strand breaks (DSBs), both natural and induced by genotoxic stress, by homologous recombination (HR).
LOC18050423	cationic amino acid transporter 7, chloroplastic	-4.57286	0.444757	3.06223e-16	3.98689e-15	Development	Chloroplast	NA	Permease involved in the transport of the cationic amino acids.
LOC18034058	monooxygenase 2	4.5574	0.408887	1.2631e-18	1.90019e-17	Stress Responses	Redox	Oxidoreductases	Monooxygenase activity
LOC112098536	putative disease resistance RPP13-like protein 1	-4.54628	0.181957	5.74853e-85	6.08801e-83	Stress Responses	Plant defense	NA	Potential disease resistance protein.
LOC18055681	metallothiol transferase FosB	4.53858	0.44134	1.90731e-16	2.51399e-15	NA	Uncharacterized process	NA	Metallothiol transferase which confers resistance to fosfomycin by catalyzing the addition of a thiol cofactor to fosfomycin. L-cysteine is probably the physiological thiol donor.
LOC18050865	polygalacturonase QRT3	-4.52953	0.189418	4.65037e-78	4.28539e-76	Development	Gametophyte	Fertilization	Polygalacturonase required for degrading the pollen mother cell wall during microspore development.
LOC112100288	heavy metal-associated isoprenylated plant protein 39	4.5282	0.132232	1.47336e-157	5.14154e-155	NA	Uncharacterized process	NA	Probable heavy-metal-binding protein.
LOC18049203	protein IQ-DOMAIN 1	-4.52595	0.419795	1.95235e-17	2.74684e-16	Signalling	Membranes, RE, signalling	NA	May be involved in cooperative interactions with calmodulins or calmodulin-like proteins. Modulates expression of glucosinolate pathway genes. May associate with nucleic acids and regulate gene expression at the transcriptional or post-transcriptional level (PubMed:15960618, PubMed:23204523).Recruits KLCR1 and calmodulin proteins to microtubules, thus being a potential scaffold in cellular signal…
LOC18034340	purple acid phosphatase 2	-4.52498	0.296744	6.0117e-33	1.71313e-31	NA	Uncharacterized process	NA	Acid phosphatase activity
LOC18048854	putative cell division cycle ATPase	-4.51624	0.175015	3.21e-90	3.71366e-88	NA	Uncharacterized process	NA	Uncharacterized process
LOC18055625	protein EFFECTOR OF TRANSCRIPTION 2	-4.51026	0.164184	1.52452e-102	2.22277e-100	Regulation and Transport	Hormonal regulation	Gibberellins	Transcriptional regulator involved in the regulation of cell differentiation in meristems. Probably regulates the expression of various KNAT genes involved in the maintenance of the cells in an undifferentiated, merismastic state. Plays a role in the regulation of gibberellin 20 oxidase and the gibberellin-regulated protein GASA4. Localizes in the nucleus during the cellular differentiation state…
LOC112100887	uncharacterized LOC112100887	-4.5075	0.463566	2.09587e-14	2.45541e-13	NA	Uncharacterized process	NA	Uncharacterized process
LOC18045296	sulfated surface glycoprotein 185	-4.50275	0.171652	4.45028e-93	5.67265e-91	Cellullar Growth	Cell wall	Matrix	The extracellular matrix (ECM) of Volvox contains insoluble fibrous layers that surround individual cells at a distance to form contiguous cellular compartments. SSG 185 is the monomeric precursor of this substructure (C3Z structure).
LOC18036274	G2/mitotic-specific cyclin-2	-4.49972	0.364797	4.54621e-22	8.18741e-21	Cellullar Growth	Cell division	Cell cycle	Essential for the control of the cell cycle at the G2/M (mitosis) transition. G2/M cyclins accumulate steadily during G2 and are abruptly destroyed at mitosi
LOC18031220	somatic embryogenesis receptor kinase 1	-4.49955	0.328681	6.57704e-27	1.45385e-25	Regulation and Transport	Hormonal regulation	Brassinosteroids	Seems to be related with early development of tissues in general rather than with embryogenesis.Dual specificity kinase acting on both serine/threonine- and tyrosine-containing substrates. Phosphorylates BRI1 on 'Ser-887' and CDC48 on at least one threonine residue and on 'Ser-41'. Confers embryogenic competence. Acts redundantly with SERK2 as a control point for sporophytic development controlli…
LOC18038301	uncharacterized LOC18038301	-4.49882	0.29636	1.94584e-32	5.4004e-31	NA	Uncharacterized process	NA	Uncharacterized process
LOC112098456	uncharacterized LOC112098456	4.49799	0.33797	9.10374e-26	1.91873e-24	NA	Uncharacterized process	NA	Uncharacterized process
LOC112097705	putative disease resistance protein At3g14460	-4.49175	0.456395	9.30882e-15	1.11262e-13	Stress Responses	Plant defense	NA	Disease resistance protein
LOC18052295	uncharacterized LOC18052295	-4.49024	0.243235	3.49936e-47	1.53907e-45	NA	Uncharacterized process	NA	Uncharacterized process
LOC112098494	putative disease resistance RPP13-like protein 1	-4.48983	0.234268	1.77787e-50	8.60127e-49	Stress Responses	Plant defense	NA	Potential disease resistance protein.
LOC18053261	chlorophyll a-b binding protein of LHCII type 1	-4.47843	0.162892	1.63941e-101	2.34215e-99	Development	Chloroplast	Photosynthesis	Photosynthesis, chloroplast
LOC18049650	GDSL esterase/lipase At5g33370	4.47613	0.253841	1.61491e-43	6.35428e-42	NA	Uncharacterized process	NA	Lipid catabolic process
LOC18039148	zinc finger protein CONSTANS-LIKE 2	-4.47208	0.248338	6.31405e-45	2.56014e-43	Gene Expression	Transcription	NA	Putative transcription factor. Does not affect flowering time.
LOC18036211	salicylic acid-binding protein 2	-4.47043	0.21217	4.88248e-61	3.08408e-59	Regulation and Transport	Hormonal regulation	Salicylic acid	Required to convert methyl salicylate (MeSA) to salicylic acid (SA) as part of the signal transduction pathways that activate systemic acquired resistance in systemic tissue. MeSA is believed to be an inactive form that needs to be demethylated to exert a biological effect. Also able to catalyze the conversion of acibenzolar-S-methyl into acibenzolar to induce systemic acquired resistance.
LOC112096297	disease resistance protein At4g27190-like	4.46985	0.253379	3.38039e-43	1.32034e-41	Stress Responses	Plant defense	NA	Disease resistance protein
LOC18035773	probable receptor-like protein kinase At2g23200	-4.46847	0.462489	2.62855e-14	3.0476e-13	Signalling	Receptors, kinases, transduction	NA	probable receptor-like protein kinase
LOC112100383	uncharacterized LOC112100383	-4.46701	0.39161	3.95368e-19	6.11643e-18	NA	Uncharacterized process	NA	Uncharacterized process
LOC18043949	protein disulfide isomerase-like 1-3	-4.46546	0.349622	1.09567e-23	2.11456e-22	Signalling	Membranes, RE, signalling	NA	Acts as a protein-folding catalyst that interacts with nascent polypeptides to catalyze the formation, isomerization, and reduction or oxidation of disulfide bonds.
LOC18041363	cytochrome P450 83B1	4.46477	0.372532	2.22688e-21	3.87284e-20	Regulation and Transport	Hormonal regulation	Auxins	Involved in the metabolism of aromatic oximes. Catalyzes the oxime metabolizing step in indole glucosinolate biosynthesis by converting indole-3-acetaldoxime into indole-3-S-alkyl-thiohydroximate. Probably required for glucosinolate activation in response to pathogens. Functions in auxin homeostasis because indole-3-acetaldoxime also serves as a precursor for auxin biosynthesis. Specifically meta…
LOC112100294	arabinogalactan peptide 14-like	-4.46397	0.31966	8.88738e-28	2.03864e-26	NA	Uncharacterized process	NA	Arabinogalactan peptide
LOC18034020	uncharacterized LOC18034020	4.46301	0.415475	2.19148e-17	3.0711e-16	NA	Uncharacterized process	NA	Uncharacterized process
LOC18035463	nuclear transcription factor Y subunit B-10	-4.45789	0.401008	2.21657e-18	3.29039e-17	Gene Expression	Transcription	NA	Component of the NF-Y/HAP transcription factor complex. The NF-Y complex stimulates the transcription of various genes by recognizing and binding to a CCAAT motif in promoters.
LOC18035994	ABC transporter G family member 29	-4.4561	0.535733	3.8737e-11	3.7312e-10	Stress Responses	Plant defense	NA	May be a general defense protein.
LOC18049091	TMV resistance protein N	-4.45583	0.286545	2.75227e-34	8.11928e-33	Stress Responses	Plant defense	NA	Disease resistance protein
LOC18053823	early nodulin-like protein 3	4.45466	0.4534	4.60538e-15	5.59879e-14	NA	Uncharacterized process	NA	Nodulation
LOC112097793	putative disease resistance protein RGA4	4.45192	0.70726	4.8259e-07	3.40726e-06	Stress Responses	Plant defense	NA	Belongs to a four-gene family located at the same locus. Although the four genes are expressed in the resistant haplotype, only RGA2 confers the resistance to P.infestans. In the susceptible haplotype, RGA1 and RGA3 are likely to be pseudogenes created by deletions and mutations, while RGA2 contains also several modifications.
LOC112100209	uncharacterized LOC112100209	-4.44789	0.532775	3.29629e-11	3.19382e-10	NA	Uncharacterized process	NA	Uncharacterized process
LOC18054745	probable pectinesterase/pectinesterase inhibitor 12	4.43845	0.312641	1.08959e-28	2.59732e-27	Cellullar Growth	Cell wall	NA	Acts in the modification of cell walls via demethylesterification of cell wall pectin.
LOC18044631	folylpolyglutamate synthase	-4.43777	0.294832	5.27785e-32	1.44781e-30	Secondary Metabolism	Cofactors, vitamins	NA	Catalyzes conversion of folates to polyglutamate derivatives allowing concentration of folate compounds in the cell and the intracellular retention of these cofactors, which are important substrates for most of the folate-dependent enzymes that are involved in one-carbon transfer reactions involved in purine, pyrimidine and amino acid synthesis. Essential for organellar and whole-plant folate hom…
LOC112101156	probable sugar phosphate/phosphate translocator At1g06470	-4.43454	0.351203	6.88415e-23	1.28434e-21	Regulation and Transport	Transport	Sugars	UDP-glucose transmembrane transport
LOC18041004	protein NUCLEAR FUSION DEFECTIVE 4	4.43434	0.148983	3.07077e-118	6.10912e-116	Development	Gametophyte	Fertilization	Required for karyogamy during female gametophyte development, when the two polar nuclei fuse to form the diploid central cell nucleus (PubMed:16698901).
LOC18039380	protein CHLORORESPIRATORY REDUCTION 7, chloroplastic	-4.42902	0.316035	1.02323e-27	2.33958e-26	Development	Chloroplast	Photosynthesis	Required for both formation and activity of the chloroplast NAD(P)H dehydrogenase (NDH) complex of the photosynthetic electron transport chain. May function in assembly or stabilization of the NDH complex (PubMed:16359395, PubMed:20444231).Required for the accumulation of NDH subcomplex A, which is a core part of NDH. May be involved in post-translational steps during the biogenesis of subcomplex…
LOC18054479	14 kDa proline-rich protein DC2.15	4.42762	0.289828	5.11137e-33	1.46048e-31	Regulation and Transport	Hormonal regulation	Auxins	May be connected with the initiation of embryogenesis or with the metabolic changes produced by the removal of auxins.
LOC18055556	protein STRICTOSIDINE SYNTHASE-LIKE 4	4.40246	0.575709	9.12791e-10	7.83807e-09	NA	Uncharacterized process	NA	Uncharacterized process
LOC18047316	probable polygalacturonase	-4.40153	0.136635	1.44725e-137	3.75702e-135	Cellullar Growth	Cell wall	NA	Involved in maceration and soft-rotting of plant tissue. Hydrolyzes the 1,4-alpha glycosidic bonds of de-esterified pectate in the smooth region of the plant cell wall.
LOC18055310	trihelix transcription factor GT-2	-4.39595	0.159516	6.12516e-101	8.69242e-99	Gene Expression	Transcription	NA	Probable transcription factor that binds specific DNA sequence.
LOC18054400	receptor-like serine/threonine-protein kinase SD1-8	4.39432	0.192467	4.27648e-70	3.35916e-68	Cellullar Growth	Cell expansion	NA	Involved in the regulation of cellular expansion and differentiation.
LOC18054912	probable disease resistance protein At1g61190	-4.39014	0.338963	4.8491e-24	9.50486e-23	Stress Responses	Plant defense	NA	Probably disease resistance protein
LOC18055484	putative GATA transcription factor 22	-4.38772	0.406415	3.52784e-17	4.89232e-16	NA	Uncharacterized process	NA	Uncharacterized process
LOC18037348	nitrate regulatory gene2 protein	-4.38443	0.244841	8.81753e-44	3.48235e-42	NA	Nitrate signalling	NA	Required for nitrate signaling. Regulates expression of the nitrate-responsive genes NIA1, NIR1, NRT2.1 and NPF6.3/NRT1.1.
LOC18038601	uncharacterized LOC18038601	-4.38301	0.316713	1.76219e-27	3.98214e-26	NA	Uncharacterized process	NA	Uncharacterized process
LOC18045628	uncharacterized LOC18045628	-4.38066	0.417948	2.80998e-16	3.66969e-15	NA	Uncharacterized process	NA	Uncharacterized process
[truncated: 2,067 more rows]

## Sheet: Supplementary_Table_4
Supplemental Table 4. Expression of genes encoding last steps in the biosynthesis of amino acids and amino acid-derived compounds, in the pulp of developing fruitlets of ICH as related to SCM.
[truncated: 47 more rows]

[truncated: 3 more sheets: Supplementary_Table_5, Supplementary_Table_6, Supplementary_Table_7]
